# Supplementary material for: Cohesin controls intestinal stem cell identity by maintaining association of Escargot with target promoters
Source: eLife. 2020 Feb 5;9:e48160. doi: 10.7554/eLife.48160 (PMC7002041; doi:10.7554/eLife.48160)
Supplement: Figure 6—source data 1. — Raw data; overlaps of genes sets between Rad21 RNAi and UAS-Rad21-HA; upregulated genes in Rad21 RNAi and Esg RNAi (Korzelius et al., 2014); upregulated genes in Rad21 RNAi and EC-specific genes (Doupé et al., 2018). [file elife-48160-fig6-data1.xlsx]

## Sheet: all_data
tracking_id	gene_short_name	tss_id	locus	Rad21RNAi_0	Rad21RNAi_1	Rad21RNAi_2	Rad21RNAi_3	Rad21HA_0	Rad21HA_1	Rad21HA_2	Rad21HA_3	Control_0	Control_1	Control_2	Control_3	status_Control%Rad21RNAi	Control	Rad21RNAi	log2(fold_change)	test_stat	p_value	q_value	significant	status_Control%Rad21HA	Control	Rad21HA	log2(fold_change)	test_stat	p_value	q_value	significant	status_Rad21RNAi%Rad21HA	Rad21RNAi	Rad21HA	log2(fold_change)	test_stat	p_value	q_value	significant
XLOC_000001	CG11023	TSS1	chr2L:7528-9484	0.757157	2.45678	1.47979	1.23689	0.630379	1.02964	1.31811	1.84908	0.785394	1.82888	2.1964	2.01927	OK	1.70749	1.48266	-0.203693	-0.198188	0.68765	0.947372	no	OK	1.70749	1.2068	-0.500687	-0.477877	0.34545	0.760367	no	OK	1.48266	1.2068	-0.296995	-0.289841	0.56755	0.904849	no
XLOC_000002	CR43609	TSS2	chr2L:21822-25155	3.74168	3.20365	4.53442	4.44538	2.6145	3.01431	3.26563	3.82236	2.84762	2.76048	3.05009	2.13716	OK	2.69884	3.98128	0.560896	0.723593	0.1508	0.520716	no	OK	2.69884	3.1792	0.236326	0.297251	0.5493	0.897133	no	OK	3.98128	3.1792	-0.32457	-0.429171	0.38925	0.797416	no
XLOC_000003	CR45339	TSS3	chr2L:65998-66242	0	4.2537	0.451667	2.39914	2.90583	0	0.401004	0	4.31029	2.54806	0	0.937275	OK	1.94891	1.77613	-0.13393	-0.0848173	0.4897	0.864854	no	OK	1.94891	0.826709	-1.23721	-0.765039	0.41815	0.820336	no	OK	1.77613	0.826709	-1.10328	-0.668303	0.36395	0.775957	no
XLOC_000004	CR45340,dbr	TSS4,TSS5,TSS6	chr2L:66317-76211	22.4765	22.7464	24.4672	31.2152	26.3579	23.9904	20.9714	26.2869	24.2411	26.9523	24.6617	23.4855	OK	24.8351	25.2263	0.0225484	0.0336235	0.9384	0.992823	no	OK	24.8351	24.4016	-0.0254055	-0.0251998	0.9289	0.991067	no	OK	25.2263	24.4016	-0.0479539	-0.0449648	0.87465	0.985234	no
XLOC_000005	galectin	TSS10,TSS7,TSS8,TSS9	chr2L:66317-76211	65.7698	64.8724	57.8959	54.6324	63.2212	55.2778	52.0109	59.607	60.0055	64.7045	60.5818	75.715	OK	65.2517	60.7926	-0.102118	-0.182569	0.7241	0.957846	no	OK	65.2517	57.5292	-0.181719	-0.328834	0.516	0.880183	no	OK	60.7926	57.5292	-0.0796011	-0.143252	0.77515	0.96798	no
XLOC_000006	CG11374	TSS11	chr2L:76347-77783	0	1.20498	1.7195	1.49061	1.42617	1.95145	1.30142	1.71019	7.01001	8.83671	8.47192	10.2759	OK	8.64863	1.10377	-2.97003	-2.71073	0.0001	0.00237535	yes	OK	8.64863	1.59731	-2.43683	-2.7841	5e-05	0.00129868	yes	OK	1.10377	1.59731	0.533202	0.426934	0.3799	0.789335	no
XLOC_000007	Zir	TSS12	chr2L:94738-102086	49.5039	57.3006	36.2734	45.0325	27.8789	33.7642	36.2436	37.6753	31.4765	33.4731	34.877	37.8464	OK	34.4182	47.0276	0.450335	1.23273	0.01325	0.107773	no	OK	34.4182	33.8905	-0.0222914	-0.0608103	0.90345	0.988309	no	OK	47.0276	33.8905	-0.472626	-1.29119	0.0091	0.0820117	no
XLOC_000008	CG11377	TSS13	chr2L:102379-106732	11.4846	10.5479	10.6345	11.7687	11.9976	9.9158	12.2538	10.0861	7.60414	7.68185	7.6787	8.3396	OK	7.82607	11.1089	0.505361	0.578876	0.26195	0.675051	no	OK	7.82607	11.0633	0.499427	0.581252	0.25335	0.666529	no	OK	11.1089	11.0633	-0.0059336	-0.00703188	0.9867	0.997708	no
XLOC_000009	Sam-S	TSS14,TSS15,TSS16,TSS17,TSS18	chr2L:106902-114432	175.222	174.931	184.637	172.523	239.086	256.245	233.851	226.198	250.475	260.383	197.7	312.211	OK	255.192	176.828	-0.529236	-1.42058	0.0048	0.0516311	no	OK	255.192	238.845	-0.0955098	-0.258863	0.6004	0.91739	no	OK	176.828	238.845	0.433726	1.18454	0.01575	0.12267	no
XLOC_000010	CG11455,CG3436	TSS19,TSS20,TSS21,TSS22,TSS23	chr2L:114725-157666	138.464	136.137	152.501	172.472	162.663	162.218	183.121	126.709	190.672	159.633	136.367	141.298	OK	156.993	149.894	-0.0667578	-0.0522695	0.9279	0.990915	no	OK	156.993	158.678	0.0154054	0.0124336	0.98365	0.997235	no	OK	149.894	158.678	0.0821632	0.0659459	0.905	0.988318	no
XLOC_000011	CR44969	TSS24	chr2L:114725-157666	124.07	148.376	96.4306	142.429	135.304	139.593	129.397	130.228	126.776	124.598	124.251	157.21	OK	133.209	127.826	-0.0595064	-0.0643548	0.89365	0.987025	no	OK	133.209	133.631	0.00456032	0.00506056	0.99045	0.998138	no	OK	127.826	133.631	0.0640667	0.0698043	0.8869	0.98629	no
XLOC_000012	Gs1	TSS25	chr2L:114725-157666	10.0666	6.87859	8.87149	5.91986	11.9738	9.69118	10.6782	13.5781	11.0539	5.22538	9.61441	8.69567	OK	8.64734	7.93414	-0.124183	-0.0502298	0.90855	0.988609	no	OK	8.64734	11.4803	0.408835	0.176814	0.73575	0.960305	no	OK	7.93414	11.4803	0.533018	0.23621	0.7024	0.951549	no
XLOC_000013	CR44185	TSS26	chr2L:114725-157666	0	0	0	0	0	0	0.124493	0	0	0	0	0.175959	NOTEST	0.0439897	0	#NAME?	0	1	1	no	NOTEST	0.0439897	0.0311233	-0.499169	0	1	1	no	NOTEST	0	0.0311233	inf	0	1	1	no
XLOC_000014	CR44186	TSS27	chr2L:114725-157666	0	0	0.352989	0	0	0.389669	0	0	0	0	0	0	NOTEST	0	0.0882471	inf	0	1	1	no	NOTEST	0	0.0974172	inf	0	1	1	no	NOTEST	0.0882471	0.0974172	0.142628	0	1	1	no
XLOC_000015	CG11454	TSS28	chr2L:114725-157666	21.9303	16.0522	18.3751	19.7311	23.7757	20.3207	20.3471	19.8116	20.2128	20.1329	16.3784	21.1136	OK	19.4594	19.0221	-0.0327894	-0.0127	0.9647	0.994778	no	OK	19.4594	21.0638	0.114295	0.0448809	0.93605	0.992476	no	OK	19.0221	21.0638	0.147084	0.0584732	0.92535	0.990915	no
XLOC_000016	spen	TSS29,TSS30	chr2L:159031-203397	39.0649	45.9362	65.86	58.3378	39.3295	47.891	57.8632	62.2514	41.1975	43.6158	60.8577	59.2027	OK	51.2184	52.2997	0.0301405	0.0817709	0.8754	0.985234	no	OK	51.2184	51.8338	0.0172296	0.0471238	0.92845	0.990989	no	OK	52.2997	51.8338	-0.0129108	-0.0351544	0.9466	0.993315	no
XLOC_000017	mRpL10	TSS31	chr2L:203778-210725	12.1252	6.99818	12.0842	8.98248	11.0852	8.6072	15.8471	10.5	7.11422	11.5595	13.6226	10.6926	OK	10.7473	10.0475	-0.0971272	-0.0984462	0.83905	0.97981	no	OK	10.7473	11.5099	0.0989044	0.107687	0.8265	0.977342	no	OK	10.0475	11.5099	0.196032	0.197706	0.68645	0.947019	no
XLOC_000018	Tbc1d15-17	TSS32,TSS33	chr2L:203778-210725	9.63373	8.63067	12.9888	8.38903	5.85144	6.00175	7.8824	8.99402	5.50723	7.16825	8.61143	6.81927	OK	7.02655	9.91056	0.496151	0.894305	0.0764	0.352539	no	OK	7.02655	7.1824	0.0316507	0.0541034	0.91625	0.98972	no	OK	9.91056	7.1824	-0.4645	-0.835082	0.09495	0.405332	no
XLOC_000019	CR44220	TSS34	chr2L:210734-250823	0	0	0	0.352612	0	0	0.442219	0	0.771361	0.525198	0	0.167853	NOTEST	0.366103	0.088153	-2.05417	0	1	1	no	NOTEST	0.366103	0.110555	-1.72749	0	1	1	no	NOTEST	0.088153	0.110555	0.32668	0	1	1	no
XLOC_000020	CR44222	TSS35	chr2L:210734-250823	0	0.167897	0.0781983	0.450973	0.490564	0.0420367	0.64993	0.307155	0.0598219	0.119338	0.180998	0.347407	NOTEST	0.176891	0.174267	-0.0215616	0	1	1	no	NOTEST	0.176891	0.372421	1.07407	0	1	1	no	NOTEST	0.174267	0.372421	1.09563	0	1	1	no
XLOC_000021	CR44221	TSS36	chr2L:210734-250823	10.5995	8.25173	6.97912	5.50096	5.84704	9.46755	8.91904	7.72473	2.98373	2.32852	5.7679	7.96478	OK	4.76123	7.83283	0.718198	0.0964911	0.5787	0.909717	no	OK	4.76123	7.98959	0.746786	0.100046	0.5449	0.894592	no	OK	7.83283	7.98959	0.0285889	0.00438058	0.98305	0.997235	no
XLOC_000022	CG13693	TSS37	chr2L:210734-250823	2.43311	1.55233	2.1214	1.09764	1.3049	0.833877	1.43216	1.42401	0.737098	0.653995	1.98978	1.19122	OK	1.14302	1.80112	0.656038	0.0843719	0.6191	0.924676	no	OK	1.14302	1.24874	0.127614	0.0151036	0.91775	0.989731	no	OK	1.80112	1.24874	-0.528424	-0.0689053	0.67915	0.944642	no
XLOC_000023	CR44218	TSS38	chr2L:210734-250823	3.90027	0.815455	1.9482	0.567746	0	1.57875	0.805502	0.460528	0.495913	0.165701	0.6677	1.07049	OK	0.59995	1.80792	1.59141	0.116101	0.2978	0.713301	no	OK	0.59995	0.711196	0.245405	0.0152459	0.87065	0.98459	no	OK	1.80792	0.711196	-1.34601	-0.10582	0.4484	0.838805	no
XLOC_000024	CR44219	TSS39	chr2L:252588-271744	4.63702	6.14259	3.79502	1.99168	1.33551	0.514946	0.296888	0.70977	2.07028	0.763077	0.888029	1.14134	OK	1.21568	4.14158	1.76841	0.722553	0.31525	0.731706	no	OK	1.21568	0.714279	-0.767208	-0.218972	0.6986	0.950382	no	OK	4.14158	0.714279	-2.53562	-0.823866	0.1204	0.464261	no
XLOC_000025	CG3345	TSS40	chr2L:252588-271744	1.54723	0.34335	0.196341	0.168316	0.049444	0.114352	0.109188	0.233725	0.21763	0.668907	0.316984	0.290009	OK	0.373383	0.563809	0.594552	0.217118	0.77885	0.96869	no	NOTEST	0.373383	0.126677	-1.5595	0	1	1	no	OK	0.563809	0.126677	-2.15405	-0.550322	0.24275	0.656974	no
XLOC_000026	CG11555	TSS41,TSS42	chr2L:273835-283269	16.295	14.3726	11.2366	12.6107	15.6062	14.3768	17.1456	10.4233	18.2429	23.887	13.1491	12.6269	OK	16.9765	13.6287	-0.316887	-0.260398	0.6079	0.920857	no	OK	16.9765	14.388	-0.238672	-0.20731	0.6886	0.947524	no	OK	13.6287	14.388	0.0782151	0.0638921	0.9011	0.987752	no
XLOC_000027	smo	TSS43	chr2L:273835-283269	2.48293	3.2178	2.78513	2.89545	2.68927	2.08535	2.53361	2.58443	2.71196	5.09303	3.85714	3.06975	OK	3.68297	2.84533	-0.372275	-0.323891	0.51495	0.87986	no	OK	3.68297	2.47316	-0.574512	-0.514699	0.31305	0.729499	no	OK	2.84533	2.47316	-0.202237	-0.16613	0.74315	0.961931	no
XLOC_000028	CG11562	TSS44	chr2L:292418-294681	20.301	17.8791	18.1416	21.1982	23.806	26.3846	22.0745	14.5636	25.7248	20.6751	16.9903	20.1449	OK	20.8838	19.38	-0.107818	-0.121683	0.80545	0.973334	no	OK	20.8838	21.7072	0.0557884	0.0616337	0.89875	0.987025	no	OK	19.38	21.7072	0.163606	0.187053	0.7041	0.952094	no
XLOC_000029	Hop	TSS45	chr2L:295121-297449	126.07	111.963	89.6475	112.318	159.524	158.399	163.635	114.808	141.961	93.5453	78.6393	158.923	OK	118.267	109.999	-0.104555	-0.279389	0.5736	0.907817	no	OK	118.267	149.091	0.334146	0.900927	0.0704	0.335955	no	OK	109.999	149.091	0.438701	1.19421	0.0188	0.138617	no
XLOC_000030	Pi3K21B	TSS46,TSS47	chr2L:297879-305233	23.135	30.7433	18.6214	25.9005	19.3771	22.462	24.9648	20.9117	26.8445	25.7497	20.0595	27.4197	OK	25.0184	24.6001	-0.0243254	-0.0594416	0.90425	0.988309	no	OK	25.0184	21.9289	-0.190152	-0.483647	0.3351	0.751749	no	OK	24.6001	21.9289	-0.165827	-0.402424	0.41515	0.817786	no
XLOC_000031	CR45367,Plc21C	TSS48,TSS49,TSS50	chr2L:305934-358174	21.6832	28.0713	30.1503	22.6058	21.7999	18.8386	20.6465	23.1657	23.6741	23.1397	24.0118	22.4151	OK	23.3102	25.6276	0.136741	0.173933	0.7072	0.953628	no	OK	23.3102	21.1127	-0.14285	-0.216493	0.6633	0.939511	no	OK	25.6276	21.1127	-0.27959	-0.348483	0.4495	0.839546	no
XLOC_000032	CG33127	TSS51	chr2L:305934-358174	4.22243	17.0852	31.6413	8.33529	3.04928	1.30648	5.08956	9.04025	0.517664	1.2843	5.60595	8.26136	OK	3.91732	15.321	1.96758	0.981165	0.14005	0.503536	no	OK	3.91732	4.62139	0.238462	0.101959	0.88535	0.986119	no	OK	15.321	4.62139	-1.72912	-0.906271	0.21675	0.626227	no
XLOC_000033	CR45366	TSS52	chr2L:305934-358174	3.34118	7.20658	8.92058	9.17551	4.9412	7.87504	8.32635	6.14678	12.9932	10.0728	9.04986	8.47937	OK	10.1488	7.16096	-0.503087	-0.227575	0.62195	0.92606	no	OK	10.1488	6.82235	-0.572973	-0.325213	0.48515	0.86121	no	OK	7.16096	6.82235	-0.0698856	-0.0291677	0.95365	0.993348	no
XLOC_000034	al	TSS53	chr2L:378111-387439	0	0	0	0	0.679008	0.78553	0.898536	0.19226	0	0.248212	0.0377814	0.723525	NOTEST	0.252379	0	#NAME?	0	1	1	no	OK	0.252379	0.638833	1.33985	0.805979	0.1145	0.450307	no	OK	0	0.638833	inf	#NAME?	5e-05	0.00129868	yes
XLOC_000035	CR43718	TSS54	chr2L:396119-396571	0	1.80758	0	0	0	0	0.121086	0	0	0.286152	0.635226	0	NOTEST	0.230344	0.451895	0.972197	0	1	1	no	NOTEST	0.230344	0.0302714	-2.92777	0	1	1	no	NOTEST	0.451895	0.0302714	-3.89996	0	1	1	no
XLOC_000036	RpI135	TSS55	chr2L:404284-407969	2.00528	4.62376	12.4394	9.4352	13.6043	13.57	14.9207	12.2825	14.5896	26.7231	16.3246	16.0604	OK	18.4244	7.12592	-1.37047	-2.8587	5e-05	0.00129868	yes	OK	18.4244	13.5944	-0.438612	-1.03393	0.0337	0.208246	no	OK	7.12592	13.5944	0.931862	1.92366	0.0001	0.00237535	yes
XLOC_000037	ebi	TSS56	chr2L:415066-419652	21.7001	26.9171	22.0843	22.5751	27.8465	30.2909	26.8742	23.8208	27.3899	30.3367	23.8623	28.8942	OK	27.6208	23.3191	-0.24424	-0.60416	0.22325	0.634819	no	OK	27.6208	27.2081	-0.0217181	-0.0534394	0.91425	0.98972	no	OK	23.3191	27.2081	0.222522	0.545255	0.27705	0.693182	no
XLOC_000038	RpLP1	TSS57	chr2L:419951-420864	5188.17	4921.34	5372.21	6003.74	4855.59	5478.49	4539.85	4544.73	5341.35	5925.68	5012.46	6038.27	OK	5579.44	5371.37	-0.0548316	-0.152182	0.75955	0.964769	no	OK	5579.44	4854.67	-0.200749	-0.558107	0.2682	0.681706	no	OK	5371.37	4854.67	-0.145917	-0.407623	0.41105	0.81463	no
XLOC_000039	CG13692	TSS58	chr2L:421770-422489	0	0	0.0796968	0.33475	0.225256	0.347394	0.489111	1.6171	0.974394	0.899641	0.614027	0.672096	OK	0.79004	0.103612	-2.93074	-1.112	0.2381	0.652666	no	OK	0.79004	0.669717	-0.238375	-0.118545	0.81655	0.975746	no	OK	0.103612	0.669717	2.69236	1.05743	0.238	0.652666	no
XLOC_000040	BBS8	TSS59	chr2L:422872-425321	0.578798	0.205145	0.134346	0.180988	0.451842	0.655981	0.385786	0.590567	0.819074	0.349997	0.518618	1.08686	OK	0.693638	0.274819	-1.3357	-0.973561	0.0383	0.227299	no	OK	0.693638	0.521044	-0.412779	-0.342148	0.4622	0.847505	no	OK	0.274819	0.521044	0.922923	0.658575	0.1358	0.495665	no
XLOC_000041	ex	TSS60	chr2L:431226-453024	36.5389	42.9496	33.5484	35.1549	23.0067	33.7781	22.9301	29.3412	37.5992	44.2029	38.7367	42.0929	OK	40.6579	37.048	-0.134143	-0.271814	0.58665	0.91279	no	OK	40.6579	27.264	-0.576539	-1.16751	0.0203	0.146581	no	OK	37.048	27.264	-0.442396	-0.858967	0.0853	0.37918	no
XLOC_000042	CR43717	TSS61	chr2L:431226-453024	0	0.43111	0	0.520676	0.282803	0.870135	0.26092	0.0648599	0	0	0.305205	0.689881	NOTEST	0.248771	0.237946	-0.0641847	0	1	1	no	NOTEST	0.248771	0.369679	0.571454	0	1	1	no	NOTEST	0.237946	0.369679	0.635639	0	1	1	no
XLOC_000043	CG4164	TSS62	chr2L:453107-454654	22.2233	25.2766	17.1968	18.503	17.0741	15.2816	16.1521	18.9029	19.3791	21.6832	14.2317	18.9636	OK	18.5644	20.7999	0.164039	0.333863	0.4944	0.867959	no	OK	18.5644	16.8527	-0.139563	-0.276662	0.5795	0.910161	no	OK	20.7999	16.8527	-0.303602	-0.609862	0.21485	0.623634	no
XLOC_000044	CG4133	TSS63	chr2L:455530-458745	0.570694	1.29448	1.50116	0.700902	1.06104	0.818317	0.682103	1.41014	0.59677	0.462556	0.478759	0.726916	OK	0.56625	1.01681	0.844538	0.775016	0.1221	0.46792	no	OK	0.56625	0.992899	0.810207	0.736273	0.1431	0.508309	no	OK	1.01681	0.992899	-0.0343306	-0.0337427	0.9468	0.993315	no
XLOC_000045	MED15,ush	TSS64,TSS65,TSS66,TSS67,TSS68	chr2L:458875-540560	34.1261	30.0423	25.7854	27.1705	22.0792	23.558	21.9797	21.5576	22.8551	21.1196	18.9215	21.9999	OK	21.224	29.2811	0.464269	0.670068	0.1922	0.589893	no	OK	21.224	22.2936	0.0709326	0.0957548	0.8522	0.981669	no	OK	29.2811	22.2936	-0.393336	-0.551528	0.27495	0.689737	no
XLOC_000046	nAChRbeta3	TSS69	chr2L:544924-552923	602.204	480.43	185.068	292.149	235.95	276.171	238.764	202.881	305.843	243.669	205.597	284.249	OK	259.84	389.963	0.585716	0.669791	0.17665	0.56444	no	OK	259.84	238.442	-0.123984	-0.158532	0.75095	0.963073	no	OK	389.963	238.442	-0.7097	-0.826394	0.1046	0.427404	no
XLOC_000047	CG2789	TSS70	chr2L:553741-560523	585.582	561.125	419.451	554.472	588.636	600.764	579.031	465.327	757.069	611.905	523.456	891	OK	695.858	530.157	-0.392371	-1.04183	0.03555	0.216315	no	OK	695.858	558.44	-0.317391	-0.826013	0.09395	0.402926	no	OK	530.157	558.44	0.0749808	0.196763	0.69935	0.950458	no
XLOC_000048	CG2794	TSS71	chr2L:564162-568121	10.0292	4.64609	8.52538	8.91321	10.5595	12.5865	13.8861	8.31723	10.5666	11.5596	9.14283	11.6621	OK	10.7328	8.02848	-0.418828	-0.582894	0.23865	0.653622	no	OK	10.7328	11.3373	0.0790551	0.1118	0.81995	0.976428	no	OK	8.02848	11.3373	0.497883	0.688216	0.1719	0.55672	no
XLOC_000049	CG2807	TSS72	chr2L:568339-572907	16.4743	22.5326	22.5096	19.3313	19.5082	19.7395	21.504	18.805	17.0554	22.5244	20.8345	18.7006	OK	19.7787	20.2119	0.0312592	0.0782112	0.87475	0.985234	no	OK	19.7787	19.8892	0.00803559	0.0202258	0.96725	0.995379	no	OK	20.2119	19.8892	-0.0232236	-0.0584551	0.9043	0.988309	no
XLOC_000050	cold	TSS73,TSS74	chr2L:574290-576896	7.67876	6.95253	5.95478	5.27946	3.48454	4.27752	3.6258	4.3513	4.23317	6.10906	4.59481	4.32097	OK	4.8145	6.46638	0.425572	0.463268	0.3515	0.765268	no	OK	4.8145	3.93479	-0.2911	-0.303675	0.54675	0.895697	no	OK	6.46638	3.93479	-0.716673	-0.7525	0.1263	0.476673	no
XLOC_000051	Pph13	TSS75	chr2L:577485-579549	0	0.20043	0.0936788	0.515405	0.974368	0.626238	0.40945	0.521312	0.214217	0.379974	0.126552	0.34616	NOTEST	0.266726	0.202378	-0.398302	0	1	1	no	OK	0.266726	0.632842	1.24649	0.808992	0.09405	0.403174	no	OK	0.202378	0.632842	1.64479	0.973107	0.0673	0.327997	no
XLOC_000052	CG13689	TSS76	chr2L:602812-604430	9.08325	3.3276	9.62054	6.95634	8.94264	5.29416	8.21064	6.82294	6.58549	6.27703	10.8007	8.50299	OK	8.04155	7.24693	-0.150103	-0.167106	0.7361	0.960305	no	OK	8.04155	7.3176	-0.136103	-0.157236	0.753	0.96359	no	OK	7.24693	7.3176	0.0139995	0.0156433	0.9777	0.996794	no
XLOC_000053	CR43648	TSS77	chr2L:605913-606412	0	0	0	0	0	0	0	0	0	0	0	0	NOTEST	0	0	0	0	1	1	no	NOTEST	0	0	0	0	1	1	no	NOTEST	0	0	0	0	1	1	no
XLOC_000054	CR44797	TSS78	chr2L:623106-623665	0	0	0	0	0	0	0	0	0	0	0	0	NOTEST	0	0	0	0	1	1	no	NOTEST	0	0	0	0	1	1	no	NOTEST	0	0	0	0	1	1	no
XLOC_000055	lectin-21Ca	TSS79	chr2L:624616-625556	0	0	0	0	0	0	0	0	0	0	0	0.0765607	NOTEST	0.0191402	0	#NAME?	0	1	1	no	NOTEST	0.0191402	0	#NAME?	0	1	1	no	NOTEST	0	0	0	0	1	1	no
XLOC_000056	CG2839	TSS80	chr2L:625651-628200	0	0	0	0	0.0233353	0	0	0	0	0	0.0651023	0.0332068	NOTEST	0.0245773	0	#NAME?	0	1	1	no	NOTEST	0.0245773	0.00583384	-2.07481	0	1	1	no	NOTEST	0	0.00583384	inf	0	1	1	no
XLOC_000057	CR45369	TSS81	chr2L:628728-629052	0	0	0	0	0	0	0	0	0	0	0	0	NOTEST	0	0	0	0	1	1	no	NOTEST	0	0	0	0	1	1	no	NOTEST	0	0	0	0	1	1	no
XLOC_000058	CR44988	TSS82	chr2L:640012-715307	0	0	0	0	0	0	0	0	0	0	0	0	NOTEST	0	0	0	0	1	1	no	NOTEST	0	0	0	0	1	1	no	NOTEST	0	0	0	0	1	1	no
XLOC_000059	Hsp60B	TSS83	chr2L:728361-730564	0	0	0	0	0.218496	0.0842591	0.379135	0.0516381	0.270494	0.0998966	0.0456703	0.0776847	NOTEST	0.123437	0	#NAME?	0	1	1	no	NOTEST	0.123437	0.183382	0.571084	0	1	1	no	NOTEST	0	0.183382	inf	0	1	1	no
XLOC_000060	GABA-B-R3	TSS84,TSS85,TSS86	chr2L:749944-762399	0	0.113378	0	0.00795084	1.33443	1.02037	0.431006	0.290775	0.659133	0.314656	0.170086	0.724828	OK	0.467176	0.0303321	-3.94505	-1.5018	0.0769	0.35399	no	OK	0.467176	0.769145	0.719291	0.688743	0.14365	0.509392	no	OK	0.0303321	0.769145	4.66434	1.80439	0.07665	0.35335	no
XLOC_000061	CR44614	TSS87	chr2L:772513-773093	0	0	0	0	0	0	0	0	0	0	0.22131	0	NOTEST	0.0553276	0	#NAME?	0	1	1	no	NOTEST	0.0553276	0	#NAME?	0	1	1	no	NOTEST	0	0	0	0	1	1	no
XLOC_000062	CG12506	TSS88	chr2L:773546-774017	0	0	0	0	0.557538	0	0	0.33847	0	0	0	0.193601	NOTEST	0.0484003	0	#NAME?	0	1	1	no	NOTEST	0.0484003	0.224002	2.21042	0	1	1	no	NOTEST	0	0.224002	inf	0	1	1	no
XLOC_000063	CG13946	TSS89	chr2L:776535-776941	0	0	0	0	0	0	0	0	0	0	0	0.163702	NOTEST	0.0409255	0	#NAME?	0	1	1	no	NOTEST	0.0409255	0	#NAME?	0	1	1	no	NOTEST	0	0	0	0	1	1	no
XLOC_000064	CG13947	TSS90	chr2L:779172-779655	0	0	0	0.130956	0	0.413249	1.42247	0	0.190673	0.51604	1.72407	0	OK	0.607695	0.0327391	-4.21426	-0.887218	0.26285	0.675757	no	OK	0.607695	0.458929	-0.405077	-0.196819	0.37505	0.785933	no	NOTEST	0.0327391	0.458929	3.80918	0	1	1	no
XLOC_000065	Gr21a	TSS91,TSS92	chr2L:780481-782885	0	0	0	0.0409814	0	0	0	0	0.0894203	0	0.196415	0.0315694	NOTEST	0.0793511	0.0102453	-2.95328	0	1	1	no	NOTEST	0.0793511	0	#NAME?	0	1	1	no	NOTEST	0.0102453	0	#NAME?	0	1	1	no
XLOC_000066	CG3544	TSS93	chr2L:784335-790798	1.27946	0.518323	1.18673	0.912941	0.202045	0.155399	0.211722	0.491594	1.14475	0.0982178	0.464252	0.405977	OK	0.528299	0.974363	0.883105	0.297586	0.6673	0.941125	no	OK	0.528299	0.26519	-0.994328	-0.260663	0.5062	0.875995	no	OK	0.974363	0.26519	-1.87743	-0.523174	0.28865	0.704594	no
XLOC_000067	CR45259	TSS94	chr2L:799855-800323	0	0	0	0	0	0	0	0.170878	0	0	0	0	NOTEST	0	0	0	0	1	1	no	NOTEST	0	0.0427195	inf	0	1	1	no	NOTEST	0	0.0427195	inf	0	1	1	no
XLOC_000068	Nnf1b	TSS95	chr2L:810576-811531	23.0769	5.99262	11.3726	10.1724	10.539	7.84691	9.00053	6.59831	12.2372	7.66733	10.4601	8.41484	OK	9.69487	12.6536	0.384257	0.518713	0.29965	0.715515	no	OK	9.69487	8.4962	-0.190404	-0.245161	0.60915	0.920921	no	OK	12.6536	8.4962	-0.574661	-0.759665	0.1151	0.451921	no
XLOC_000069	Dbp21E2	TSS96	chr2L:811583-815950	8.50971	4.7168	6.53405	7.30455	11.0596	10.2576	10.2152	6.52568	7.22732	7.4347	6.86324	8.9532	OK	7.61962	6.76628	-0.171356	-0.233573	0.6456	0.933475	no	OK	7.61962	9.51453	0.320415	0.462763	0.35465	0.768029	no	OK	6.76628	9.51453	0.491771	0.716125	0.1515	0.522141	no
XLOC_000070	Pex12	TSS97	chr2L:815992-819508	0.468822	0.841936	1.55415	0.933698	1.26333	1.86014	1.73872	1.76367	1.1687	1.65907	1.39182	1.6432	OK	1.4657	0.949651	-0.626116	-0.374394	0.45685	0.843694	no	OK	1.4657	1.65646	0.176522	0.142284	0.7669	0.966874	no	OK	0.949651	1.65646	0.802638	0.497805	0.3162	0.732486	no
XLOC_000071	Clp	TSS98	chr2L:819963-821209	4.20682	4.85278	6.48972	7.5431	9.86769	12.0328	10.0566	6.16645	5.3174	9.61688	8.89886	8.61989	OK	8.11326	5.77311	-0.490934	-0.680364	0.17415	0.560961	no	OK	8.11326	9.53088	0.232327	0.351756	0.4755	0.855864	no	OK	5.77311	9.53088	0.723261	1.02327	0.041	0.236888	no
XLOC_000072	CG3662	TSS100,TSS99	chr2L:821288-825861	307.447	305.749	256.645	248.083	161.72	125.569	134.73	201.924	128.312	157.201	197.235	181.078	OK	165.956	279.481	0.751946	2.03463	5e-05	0.00129868	yes	OK	165.956	155.986	-0.0893925	-0.235436	0.6468	0.933581	no	OK	279.481	155.986	-0.841338	-2.24327	5e-05	0.00129868	yes
XLOC_000073	dock	TSS101	chr2L:825968-833241	42.9251	45.482	26.7048	39.5209	33.4082	37.6161	29.5218	33.2426	29.1912	29.2492	26.047	33.5566	OK	29.511	38.6582	0.389523	1.01749	0.0417	0.239723	no	OK	29.511	33.4472	0.180632	0.470424	0.35075	0.764916	no	OK	38.6582	33.4472	-0.208891	-0.545062	0.27435	0.689319	no
XLOC_000074	CR44060	TSS102	chr2L:833583-851163	65.5259	88.7722	62.0461	83.068	45.7976	68.9928	56.1892	80.0733	90.7704	81.6853	92.4603	99.1259	OK	91.0105	74.853	-0.281971	-0.186327	0.7086	0.953876	no	OK	91.0105	62.7632	-0.536113	-0.365061	0.4609	0.846422	no	OK	74.853	62.7632	-0.254142	-0.169854	0.72765	0.958446	no
XLOC_000075	kraken	TSS103	chr2L:852767-854539	84.8863	73.0377	51.1972	63.5345	70.8648	90.0705	75.0277	62.7634	83.4495	70.7196	56.3932	81.3781	OK	72.9851	68.1639	-0.0985938	-0.244141	0.62295	0.926511	no	OK	72.9851	74.6816	0.0331512	0.0834381	0.8695	0.98459	no	OK	68.1639	74.6816	0.131745	0.327596	0.5171	0.880799	no
XLOC_000076	CG13949	TSS104,TSS105	chr2L:855336-856639	0	0	0	0.0681445	0	0	0	0	0	0	0	0	NOTEST	0	0.0170361	inf	0	1	1	no	NOTEST	0	0	0	0	1	1	no	NOTEST	0.0170361	0	#NAME?	0	1	1	no
XLOC_000077	CR45345	TSS106	chr2L:857402-857795	0	0	0	0	0	0	0.303681	0	0	0	0	0.345936	NOTEST	0.086484	0	#NAME?	0	1	1	no	NOTEST	0.086484	0.0759202	-0.18795	0	1	1	no	NOTEST	0	0.0759202	inf	0	1	1	no
XLOC_000078	CG13950	TSS107	chr2L:860308-861806	0	0	0.176425	0	0.246361	0	0	0	0	0	0.238165	0	NOTEST	0.0595413	0.0441063	-0.432908	0	1	1	no	NOTEST	0.0595413	0.0615902	0.0488089	0	1	1	no	NOTEST	0.0441063	0.0615902	0.481717	0	1	1	no
XLOC_000079	PNUTS	TSS108,TSS109	chr2L:870464-877038	96.0515	89.5601	100.972	108.202	65.6166	69.2209	64.4072	84.4925	81.5055	115.734	117.094	104.175	OK	104.627	98.6963	-0.0841885	-0.220173	0.65995	0.938182	no	OK	104.627	70.9343	-0.560701	-1.43587	0.00395	0.0445999	yes	OK	98.6963	70.9343	-0.476513	-1.23709	0.013	0.106193	no
XLOC_000080	ninaA	TSS110	chr2L:877171-885141	0	0.487756	0	0.297064	0.476432	0.183705	0.39669	0.481879	0	0.231303	0.130988	0.64427	NOTEST	0.25164	0.196205	-0.359001	0	1	1	no	NOTEST	0.25164	0.384677	0.612283	0	1	1	no	NOTEST	0.196205	0.384677	0.971284	0	1	1	no
XLOC_000081	Lsp1beta	TSS111,TSS112	chr2L:898499-901316	0.124167	0	0.329536	0.622508	0.364767	0.369251	0.201572	0.226538	0.49799	0.133468	0.292614	0.349187	NOTEST	0.318315	0.269053	-0.242564	0	1	1	no	NOTEST	0.318315	0.290532	-0.131756	0	1	1	no	NOTEST	0.269053	0.290532	0.110808	0	1	1	no
XLOC_000082	CR45261	TSS113	chr2L:904028-904347	0	0	0	0	0	0	0	0	0	0.26787	0	0	NOTEST	0.0669675	0	#NAME?	0	1	1	no	NOTEST	0.0669675	0	#NAME?	0	1	1	no	NOTEST	0	0	0	0	1	1	no
XLOC_000083	GluRIIC	TSS114	chr2L:914085-917805	0	0	0.0566633	0	0	0	0.0247543	0.0185493	0	0	0	0.0209147	NOTEST	0.00522867	0.0141658	1.4379	0	1	1	no	NOTEST	0.00522867	0.0108259	1.04997	0	1	1	no	NOTEST	0.0141658	0.0108259	-0.387928	0	1	1	no
XLOC_000084	CG4341	TSS115	chr2L:922792-958098	32.1591	18.3138	25.8864	10.6156	8.63649	4.01172	2.76286	10.7561	5.17171	3.37133	4.18516	4.1619	OK	4.22253	21.7437	2.36442	4.84265	5e-05	0.00129868	yes	OK	4.22253	6.54179	0.63158	1.18042	0.0147	0.116392	no	OK	21.7437	6.54179	-1.73284	-3.7181	5e-05	0.00129868	yes
XLOC_000085	CG4415	TSS116	chr2L:1008377-1048053	3.37442	0.382864	0.892603	0.449198	0.248589	0.0383436	0.437235	0.397622	0	0.440435	0.964257	0.873939	OK	0.569658	1.27477	1.16207	0.0525908	0.4183	0.820406	no	OK	0.569658	0.280447	-1.02237	-0.0373869	0.5038	0.874751	no	OK	1.27477	0.280447	-2.18444	-0.0741747	0.1608	0.539386	no
XLOC_000086	ast	TSS117	chr2L:1077947-1080803	3.22929	4.72772	8.36904	6.74339	6.63965	9.17789	8.30698	7.39761	6.81638	10.0976	9.32635	7.86299	OK	8.52583	5.76736	-0.563929	-1.02544	0.0401	0.233289	no	OK	8.52583	7.88053	-0.113547	-0.218671	0.6599	0.938182	no	OK	5.76736	7.88053	0.450382	0.81115	0.10055	0.418442	no
XLOC_000087	Atg4a	TSS118	chr2L:1080910-1102504	53.789	57.7654	40.82	39.9057	23.2203	31.3115	25.4574	32.5953	30.2862	33.9825	33.808	28.5001	OK	31.6442	48.07	0.603196	1.20985	0.0163	0.125587	no	OK	31.6442	28.1461	-0.169004	-0.334949	0.5117	0.878555	no	OK	48.07	28.1461	-0.772201	-1.55703	0.0025	0.0311933	yes
XLOC_000088	CG14339	TSS119	chr2L:1108539-1112694	0.34192	0.526228	0.661528	0.570708	0.286824	0.732799	0.702623	0.747339	0.256946	0.36748	0.921539	0.919107	OK	0.616268	0.525096	-0.230976	-0.195725	0.69725	0.949811	no	OK	0.616268	0.617396	0.00263871	0.00220346	0.993	0.998502	no	OK	0.525096	0.617396	0.233615	0.195789	0.7002	0.950458	no
XLOC_000089	CG14340	TSS120	chr2L:1112940-1114138	0	0	0.509131	0.4369	0.388075	0.399043	0.891186	0.878681	0.918208	0.613101	0.78543	0.525947	OK	0.710671	0.236508	-1.5873	-0.891953	0.05815	0.300696	no	OK	0.710671	0.639246	-0.152811	-0.103543	0.8232	0.977029	no	OK	0.236508	0.639246	1.43448	0.792072	0.09	0.391917	no
XLOC_000090	CG4552	TSS121	chr2L:1129315-1134098	35.3025	32.2461	25.954	27.3411	22.1737	24.1729	25.4913	26.8018	24.4277	26.0196	25.1088	23.9825	OK	24.8846	30.2109	0.279816	0.690013	0.16715	0.549166	no	OK	24.8846	24.6599	-0.0130879	-0.0317078	0.9501	0.993315	no	OK	30.2109	24.6599	-0.292904	-0.717805	0.1477	0.515047	no
XLOC_000091	CG4577	TSS122	chr2L:1134692-1141156	356.492	343.254	269.47	193.932	326.637	189.109	220.732	418.764	270.72	124.609	122.926	254.579	OK	193.209	290.787	0.589801	1.5851	0.00155	0.0215681	yes	OK	193.209	288.811	0.579963	1.54697	0.00165	0.0226622	yes	OK	290.787	288.811	-0.00983874	-0.0267697	0.95575	0.993716	no
XLOC_000092	CR45717,MFS3	TSS123,TSS124	chr2L:1142868-1147395	29.0993	20.329	10.0007	10.294	26.4666	29.2596	16.5966	19.8549	38.8662	28.8082	16.4894	30.9249	OK	28.7722	17.4307	-0.723041	-1.52588	0.00275	0.0335951	yes	OK	28.7722	23.0444	-0.320255	-0.709261	0.13825	0.499827	no	OK	17.4307	23.0444	0.402785	0.842372	0.0914	0.395666	no
XLOC_000093	CG4749	TSS125	chr2L:1147821-1150677	2.38237	3.58382	3.32003	3.22096	2.85771	3.58516	3.71851	3.05377	3.01222	3.36948	2.11781	3.35424	OK	2.96344	3.12679	0.0774123	0.0699181	0.889	0.98629	no	OK	2.96344	3.30379	0.156848	0.145245	0.7691	0.967325	no	OK	3.12679	3.30379	0.0794362	0.0731723	0.87925	0.98534	no
XLOC_000094	Vps29	TSS126	chr2L:1150765-1158262	40.1823	27.7543	23.7088	27.4352	25.2317	26.0826	26.885	20.8929	27.6133	29.548	24.3204	21.5346	OK	25.7541	29.7701	0.209066	0.150562	0.76065	0.964793	no	OK	25.7541	24.7731	-0.0560281	-0.0420492	0.9329	0.991806	no	OK	29.7701	24.7731	-0.265094	-0.184548	0.7107	0.954413	no
XLOC_000095	Tango14	TSS127	chr2L:1158575-1160220	24.5106	25.6864	25.844	25.0353	24.8899	26.9785	22.3529	22.6974	22.7053	34.9514	31.1133	22.8771	OK	27.9118	25.2691	-0.143502	-0.299023	0.5489	0.896838	no	OK	27.9118	24.2297	-0.204097	-0.423125	0.3955	0.802808	no	OK	25.2691	24.2297	-0.0605957	-0.124565	0.8025	0.973334	no
XLOC_000096	IntS14	TSS128	chr2L:1164442-1166425	1.03307	3.5642	3.94834	4.30507	6.93023	5.0277	6.26433	4.8412	3.20086	5.32225	3.75274	3.48557	OK	3.94035	3.21267	-0.294551	-0.388044	0.4141	0.817039	no	OK	3.94035	5.76586	0.549212	0.79834	0.10095	0.419278	no	OK	3.21267	5.76586	0.843762	1.17095	0.01415	0.113196	no
XLOC_000097	CG14341	TSS129	chr2L:1166505-1172805	9.15266	11.6504	10.1855	10.8706	15.4637	12.5564	15.394	10.8944	10.6322	10.9696	11.738	9.41106	OK	10.6877	10.4648	-0.0304071	-0.0166557	0.9717	0.99603	no	OK	10.6877	13.5771	0.345226	0.18637	0.7301	0.958802	no	OK	10.4648	13.5771	0.375633	0.203265	0.70285	0.95173	no
XLOC_000098	CG31922	TSS130	chr2L:1166505-1172805	4.12009	4.42335	10.861	6.77734	4.6159	7.3813	11.3246	7.8108	7.85733	5.31167	7.98904	8.03233	OK	7.29759	6.54544	-0.15693	-0.0579392	0.92765	0.990915	no	OK	7.29759	7.78315	0.0929338	0.032847	0.9594	0.994308	no	OK	6.54544	7.78315	0.249864	0.0870399	0.88925	0.986298	no
XLOC_000099	CG4887	TSS131	chr2L:1173008-1177589	34.9437	35.4813	39.8469	42.4597	32.6845	35.2113	37.7553	34.7857	36.5733	34.1019	37.6122	33.7849	OK	35.518	38.1829	0.104374	0.270903	0.58925	0.914152	no	OK	35.518	35.1092	-0.0167026	-0.0434167	0.93125	0.991185	no	OK	38.1829	35.1092	-0.121077	-0.315147	0.524	0.884484	no
XLOC_000100	CG4896	TSS132	chr2L:1177689-1184020	6.34497	8.61939	10.9281	9.52732	8.915	8.9391	11.6304	10.1493	10.429	8.22124	10.4945	9.50276	OK	9.66187	8.85496	-0.125818	-0.224743	0.6594	0.938096	no	OK	9.66187	9.90845	0.036356	0.066269	0.89845	0.987025	no	OK	8.85496	9.90845	0.162174	0.28472	0.5752	0.908199	no
XLOC_000101	Tgt	TSS133	chr2L:1184064-1185698	53.8684	49.2681	28.619	35.2222	29.2915	34.5308	29.8589	27.2135	42.0229	36.9921	35.2444	34.8847	OK	37.286	41.7444	0.16295	0.384964	0.43895	0.833161	no	OK	37.286	30.2237	-0.302955	-0.706306	0.1511	0.521202	no	OK	41.7444	30.2237	-0.465904	-1.07954	0.0295	0.190906	no
XLOC_000102	CG5001	TSS134,TSS135,TSS136	chr2L:1185756-1196807	69.7544	81.5564	47.4609	56.2225	26.9898	34.1124	30.4633	46.6743	46.3456	59.8303	54.8502	56.267	OK	54.3233	63.7486	0.230822	0.584661	0.246	0.660531	no	OK	54.3233	34.5599	-0.65247	-1.59319	0.00125	0.0183387	yes	OK	63.7486	34.5599	-0.883293	-2.16353	5e-05	0.00129868	yes
XLOC_000103	CG43348	TSS137	chr2L:1199411-1199924	9.16983	10.1745	12.4208	8.02692	5.53938	5.15029	6.30539	13.7219	6.97671	5.4188	4.55993	6.92534	OK	5.97019	9.948	0.736628	0.758336	0.12435	0.47249	no	OK	5.97019	7.67923	0.363183	0.354677	0.47275	0.853778	no	OK	9.948	7.67923	-0.373445	-0.391132	0.4336	0.830157	no
XLOC_000104	CG43349	TSS138	chr2L:1200204-1200663	152.177	100.905	125.489	90.6095	93.2901	139.61	130.569	169.268	78.7162	102.251	92.0263	131.591	OK	101.146	117.295	0.213704	0.421892	0.40135	0.807808	no	OK	101.146	133.184	0.396984	0.791043	0.11015	0.440277	no	OK	117.295	133.184	0.18328	0.373565	0.45075	0.840063	no
XLOC_000105	CG5011	TSS139,TSS140	chr2L:1200670-1201220	36.5771	27.9205	38.3408	34.3701	40.3968	45.5462	31.6966	48.5464	26.0825	29.2735	37.1981	41.5172	OK	33.5178	34.3021	0.0333697	0.0506235	0.91745	0.989731	no	OK	33.5178	41.5465	0.309798	0.492916	0.32595	0.742731	no	OK	34.3021	41.5465	0.276429	0.437303	0.3779	0.788442	no
XLOC_000106	CG14342	TSS141	chr2L:1204214-1205250	0	2.43346	0.376238	1.25032	0	0.407682	0.0549279	0.205233	0.766086	0.320587	0.483407	0.124169	OK	0.423562	1.01501	1.26084	0.653392	0.2282	0.640872	no	NOTEST	0.423562	0.166961	-1.34307	0	1	1	no	OK	1.01501	0.166961	-2.60391	-1.19181	0.22335	0.634977	no
XLOC_000107	CG42329	TSS142	chr2L:1219292-1229802	1.6381	0.631664	0.678092	0.601164	1.56419	2.11586	1.96005	0.89929	4.95531	4.96563	1.77206	5.09329	OK	4.19657	0.887255	-2.24179	-2.29362	0.00035	0.00662569	yes	OK	4.19657	1.63485	-1.36006	-1.69428	0.0017	0.0232041	yes	OK	0.887255	1.63485	0.881735	0.82401	0.1083	0.436356	no
XLOC_000108	CG5397	TSS143	chr2L:1240035-1243018	0	0	0	0.0437424	0	0	0	0.0136645	0	0	0	0	NOTEST	0	0.0109356	inf	0	1	1	no	NOTEST	0	0.00341613	inf	0	1	1	no	NOTEST	0.0109356	0.00341613	-1.6786	0	1	1	no
XLOC_000109	robo3	TSS144	chr2L:1256416-1296596	0	0	0	0	0.0520064	0.0561572	0.0131705	0	0.0689152	0.121919	0	0.0111225	NOTEST	0.0504892	0	#NAME?	0	1	1	no	NOTEST	0.0504892	0.0303335	-0.735062	0	1	1	no	NOTEST	0	0.0303335	inf	0	1	1	no
XLOC_000110	a5	TSS145	chr2L:1329160-1329993	0	0	0	0	0	0	0	0	0	0.133717	0	0	NOTEST	0.0334292	0	#NAME?	0	1	1	no	NOTEST	0.0334292	0	#NAME?	0	1	1	no	NOTEST	0	0	0	0	1	1	no
XLOC_000111	CG5440	TSS146	chr2L:1334127-1335514	0	0	0	0	0	0	0	0	0	0	0	0	NOTEST	0	0	0	0	1	1	no	NOTEST	0	0	0	0	1	1	no	NOTEST	0	0	0	0	1	1	no
XLOC_000112	Cdlc2	TSS147	chr2L:1344399-1345135	0	0	0	0	0	0	0	0	0	0	0	0	NOTEST	0	0	0	0	1	1	no	NOTEST	0	0	0	0	1	1	no	NOTEST	0	0	0	0	1	1	no
XLOC_000113	CG14346	TSS148	chr2L:1367995-1369050	0	0	0.135305	0	0	0.0734255	0	0	0	0	0	0	NOTEST	0	0.0338263	inf	0	1	1	no	NOTEST	0	0.0183564	inf	0	1	1	no	NOTEST	0.0338263	0.0183564	-0.881863	0	1	1	no
XLOC_000114	CR44897	TSS149	chr2L:1380082-1420453	111.551	114.689	129.819	124.997	65.4441	62.5166	65.6959	75.0225	81.5739	104.422	132.376	92.446	OK	102.704	120.264	0.227708	0.310353	0.5341	0.889173	no	OK	102.704	67.1698	-0.612614	-0.812979	0.10395	0.426025	no	OK	120.264	67.1698	-0.840322	-1.1277	0.0256	0.172859	no
XLOC_000115	CG43401	TSS150	chr2L:1428473-1429159	0	0	0	0	0	0	0	0	0	0	0	0	NOTEST	0	0	0	0	1	1	no	NOTEST	0	0	0	0	1	1	no	NOTEST	0	0	0	0	1	1	no
XLOC_000116	snRNA:U3:22A	TSS151	chr2L:1432710-1432921	0	0	0	0	0	0	0	0	0	0	0	0	NOTEST	0	0	0	0	1	1	no	NOTEST	0	0	0	0	1	1	no	NOTEST	0	0	0	0	1	1	no
XLOC_000117	CG43402	TSS152	chr2L:1442626-1443832	0	0	0.385014	0.0807399	0	0.289701	0.134731	0.20164	0	0.195832	0.148529	0.0760159	NOTEST	0.105094	0.116439	0.147887	0	1	1	no	NOTEST	0.105094	0.156518	0.574648	0	1	1	no	NOTEST	0.116439	0.156518	0.426761	0	1	1	no
XLOC_000118	CG31928	TSS153	chr2L:1492294-1493859	0	0.434985	0	0.106353	0	0	0.0295624	0	0	0	0	0.0282669	NOTEST	0.00706672	0.135335	4.25934	0	1	1	no	NOTEST	0.00706672	0.0073906	0.064649	0	1	1	no	NOTEST	0.135335	0.0073906	-4.1947	0	1	1	no
XLOC_000119	CG33128	TSS154	chr2L:1494069-1495456	0	0	0	0.0688218	0	0.035218	0	0.0859573	0	0	0	0.0647636	NOTEST	0.0161909	0.0172054	0.0876826	0	1	1	no	NOTEST	0.0161909	0.0302938	0.903841	0	1	1	no	NOTEST	0.0172054	0.0302938	0.816159	0	1	1	no
XLOC_000120	CG31926	TSS155,TSS156	chr2L:1495459-1497071	0	0.218972	0	0.0356901	0	0	0	0.0445746	0.169191	0	0.0262703	0.10077	NOTEST	0.0740579	0.0636655	-0.218143	0	1	1	no	NOTEST	0.0740579	0.0111436	-2.73243	0	1	1	no	NOTEST	0.0636655	0.0111436	-2.51429	0	1	1	no
XLOC_000121	CG31661	TSS157	chr2L:1497242-1500608	0	0.584924	0.102308	0.0357521	0	0	0	0.0669773	0	0	0.0263162	0.084119	NOTEST	0.0276088	0.180746	2.71076	0	1	1	no	NOTEST	0.0276088	0.0167443	-0.721455	0	1	1	no	NOTEST	0.180746	0.0167443	-3.43222	0	1	1	no
XLOC_000122	CR44064	TSS158	chr2L:1500783-1504204	0	0	0.120111	0.0839529	0	0.129171	0	0	0	0	0.0308846	0	NOTEST	0.00772115	0.0510159	2.72406	0	1	1	no	NOTEST	0.00772115	0.0322927	2.06432	0	1	1	no	NOTEST	0.0510159	0.0322927	-0.659739	0	1	1	no
XLOC_000123	Or22a	TSS159	chr2L:1520490-1522156	0	0.410703	0	0.200895	0.843997	0.205553	0.307265	0.543667	0.243552	0.356914	0.172543	0.315057	NOTEST	0.272017	0.152899	-0.831113	0	1	1	no	OK	0.272017	0.475121	0.804598	0.452625	0.3443	0.759465	no	OK	0.152899	0.475121	1.63571	0.875231	0.1441	0.509836	no
XLOC_000124	Or22b	TSS160	chr2L:1522696-1524257	0	0.227687	0.106172	0.18552	0.147828	0.342026	0.0928688	0.324363	0	0.395759	0.109234	0.227004	NOTEST	0.182999	0.129845	-0.495051	0	1	1	no	NOTEST	0.182999	0.226771	0.309401	0	1	1	no	NOTEST	0.129845	0.226771	0.804453	0	1	1	no
XLOC_000125	haf	TSS161	chr2L:1555128-1611157	0	0.153908	0.180338	0.264431	0.299035	0.141408	0.26022	0.372078	0.192323	0.392027	0.612859	0.239772	NOTEST	0.359245	0.149669	-1.26319	0	1	1	no	NOTEST	0.359245	0.268185	-0.421739	0	1	1	no	NOTEST	0.149669	0.268185	0.841452	0	1	1	no
XLOC_000126	CG14352	TSS162	chr2L:1611409-1614160	4.03178	1.5915	3.70277	1.89323	3.1046	3.0427	2.91661	2.96934	3.67283	2.16943	2.21348	2.4468	OK	2.62564	2.80482	0.0952414	0.0382393	0.94115	0.993315	no	OK	2.62564	3.00831	0.196287	0.0812111	0.84755	0.9812	no	OK	2.80482	3.00831	0.101046	0.0423182	0.87545	0.985234	no
XLOC_000127	chinmo	TSS163,TSS164	chr2L:1651257-1704682	0.258489	0.221751	0.219228	0.229306	0.317321	0.143597	0.0944486	0.435395	0.257346	0.20969	0.299228	0.200858	NOTEST	0.24178	0.232194	-0.0583683	0	1	1	no	NOTEST	0.24178	0.24769	0.0348404	0	1	1	no	NOTEST	0.232194	0.24769	0.0932088	0	1	1	no
XLOC_000128	cpb	TSS165,TSS166	chr2L:1704901-1706962	173.543	161.926	98.43	107.154	82.9545	84.414	83.9412	81.7951	76.6966	104.567	88.1275	84.6273	OK	88.5045	135.263	0.611946	1.61156	0.0014	0.0200261	yes	OK	88.5045	83.2762	-0.0878471	-0.230694	0.6479	0.93392	no	OK	135.263	83.2762	-0.699793	-1.84242	0.00025	0.00508582	yes
XLOC_000129	CR44976	TSS167	chr2L:1707131-1710421	97.3604	78.4386	39.108	43.4561	39.6989	33.0217	36.5283	32.6652	39.7581	45.1898	32.3435	37.2737	OK	38.6413	64.5908	0.741185	0.814185	0.1103	0.440385	no	OK	38.6413	35.4785	-0.123198	-0.126386	0.80655	0.973716	no	OK	64.5908	35.4785	-0.864383	-0.90942	0.07555	0.350708	no
XLOC_000130	mRpL48	TSS168	chr2L:1710461-1715851	26.3074	33.3229	24.5292	30.5381	38.694	37.2765	32.8845	26.4944	32.8397	30.8365	30.312	28.2037	OK	30.548	28.6744	-0.0913143	-0.127516	0.7987	0.972858	no	OK	30.548	33.8374	0.14754	0.208585	0.6737	0.942652	no	OK	28.6744	33.8374	0.238854	0.338901	0.49335	0.867545	no
XLOC_000131	Rrp40	TSS169	chr2L:1724767-1729762	8.48932	3.42381	12.7138	9.01737	11.6467	13.6971	16.3418	9.13141	13.4807	13.6518	14.2047	11.0682	OK	13.1013	8.41108	-0.639348	-0.234233	0.7769	0.968155	no	OK	13.1013	12.7043	-0.0444001	-0.0184027	0.98555	0.997433	no	OK	8.41108	12.7043	0.594948	0.226377	0.81215	0.974917	no
XLOC_000132	CG31937	TSS170	chr2L:1729886-1732356	37.3412	23.2956	24.8947	25.65	23.5771	22.4539	21.4703	18.0738	24.5388	26.1293	22.6054	26.0147	OK	24.822	27.7954	0.163224	0.313111	0.52535	0.8851	no	OK	24.822	21.3938	-0.214431	-0.395023	0.42455	0.824234	no	OK	27.7954	21.3938	-0.377656	-0.715588	0.14725	0.514355	no
XLOC_000133	CG17646	TSS171,TSS172	chr2L:1732523-1750612	11.4388	6.17223	5.11635	8.37611	15.1295	10.8008	13.575	11.3223	7.13626	5.00019	7.09618	8.54363	OK	6.94407	7.77587	0.163223	0.312418	0.5364	0.890257	no	OK	6.94407	12.7069	0.87176	1.77429	0.00045	0.00814181	yes	OK	7.77587	12.7069	0.708537	1.48004	0.0038	0.0432303	yes
XLOC_000134	CG17648	TSS173	chr2L:1752307-1752848	0	0	0	0	0	0	0	0	0	0	0	0	NOTEST	0	0	0	0	1	1	no	NOTEST	0	0	0	0	1	1	no	NOTEST	0	0	0	0	1	1	no
XLOC_000135	Gr22e	TSS174	chr2L:1784061-1785286	0	0	0	0	0	0	0	0	0	0	0	0	NOTEST	0	0	0	0	1	1	no	NOTEST	0	0	0	0	1	1	no	NOTEST	0	0	0	0	1	1	no
XLOC_000136	wry	TSS175	chr2L:1836537-1858550	0	0	0.0229574	0.016044	0.0316735	0.00814131	0.00668234	0	0	0.0231705	0	0.0225787	NOTEST	0.0114373	0.00975037	-0.230218	0	1	1	no	NOTEST	0.0114373	0.0116243	0.023394	0	1	1	no	NOTEST	0.00975037	0.0116243	0.253612	0	1	1	no
XLOC_000137	CG7295	TSS176	chr2L:1858608-1881480	0	0	0	0.084966	0.226026	0	0	0.19712	0.803529	0	0.156283	0.0600088	NOTEST	0.254955	0.0212415	-3.58529	0	1	1	no	NOTEST	0.254955	0.105787	-1.26909	0	1	1	no	NOTEST	0.0212415	0.105787	2.3162	0	1	1	no
XLOC_000138	CR44075	TSS177	chr2L:1858608-1881480	0	0	0.0610987	0	1.11531	0	0.0535078	0.0399901	0	0.124887	0	0.0604793	NOTEST	0.0463415	0.0152747	-1.60117	0	1	1	no	NOTEST	0.0463415	0.302203	2.70514	0	1	1	no	NOTEST	0.0152747	0.302203	4.30631	0	1	1	no
XLOC_000139	CG7337	TSS178,TSS179,TSS180	chr2L:1884621-1944289	27.0588	26.723	29.7441	28.622	25.9524	25.9571	23.374	30.8547	30.1099	28.3391	27.3575	30.894	OK	29.1751	28.037	-0.0574076	-0.15281	0.75865	0.964714	no	OK	29.1751	26.5345	-0.136867	-0.364788	0.4662	0.850318	no	OK	28.037	26.5345	-0.0794592	-0.210238	0.66865	0.941313	no
XLOC_000140	Der-1	TSS181,TSS182	chr2L:1973956-1975413	47.1439	51.7281	39.7053	41.0475	35.0763	35.9276	38.3141	34.8841	36.5487	35.5279	33.8429	34.2686	OK	35.047	44.9062	0.357623	0.792934	0.1076	0.434514	no	OK	35.047	36.0505	0.040729	0.088265	0.856	0.981712	no	OK	44.9062	36.0505	-0.316894	-0.7043	0.1541	0.526726	no
XLOC_000141	CG15362	TSS183	chr2L:1981175-1982099	0	1.46179	3.63741	0.646964	0.692778	0.868141	1.13401	2.0178	1.03559	0.945363	1.94868	1.12909	OK	1.26468	1.43654	0.183822	0.131308	0.7869	0.970085	no	OK	1.26468	1.17818	-0.102212	-0.0725873	0.88805	0.98629	no	OK	1.43654	1.17818	-0.286034	-0.205482	0.6834	0.945935	no
XLOC_000142	CG7289	TSS184	chr2L:1982216-1987758	7.63316	13.7298	12.5554	13.6491	11.7855	12.3673	13.9763	13.1869	9.88067	12.0813	15.1081	11.8034	OK	12.2184	11.8919	-0.0390762	-0.0319322	0.9491	0.993315	no	OK	12.2184	12.829	0.070356	0.059265	0.90405	0.988309	no	OK	11.8919	12.829	0.109432	0.0965044	0.84575	0.98109	no
XLOC_000143	Npc2a	TSS185	chr2L:1988289-1988940	273.932	250.111	141.392	288.963	284.246	292.93	285.689	184.716	285.765	218.046	265.657	311.183	OK	270.163	238.599	-0.179238	-0.465261	0.3368	0.753437	no	OK	270.163	261.895	-0.0448388	-0.117528	0.8075	0.974145	no	OK	238.599	261.895	0.134399	0.347655	0.47675	0.856409	no
XLOC_000144	CR42874	TSS186	chr2L:1989449-1990894	0.250731	0.355581	0.563994	0.556474	4.61587	4.84147	7.25398	1.9113	4.45263	2.19122	3.09781	5.02402	OK	3.69142	0.431695	-3.09609	-2.52504	5e-05	0.00129868	yes	OK	3.69142	4.65566	0.334808	0.411387	0.38425	0.79302	no	OK	0.431695	4.65566	3.4309	2.83692	5e-05	0.00129868	yes
XLOC_000145	CR43464	TSS187	chr2L:1997101-2006313	0.33193	0.338811	0.052845	0.184561	0.0731457	0	0.076968	0.103794	0.214774	0	0	0.0867264	NOTEST	0.0753751	0.227037	1.59077	0	1	1	no	NOTEST	0.0753751	0.063477	-0.247855	0	1	1	no	NOTEST	0.227037	0.063477	-1.83862	0	1	1	no
XLOC_000146	CR45712	TSS188	chr2L:2006762-2007688	0	0	0	0.382895	0	0	0	0.0796161	0	0	0	0.240788	NOTEST	0.060197	0.0957237	0.669185	0	1	1	no	NOTEST	0.060197	0.019904	-1.59663	0	1	1	no	NOTEST	0.0957237	0.019904	-2.26582	0	1	1	no
XLOC_000147	Nplp4	TSS189	chr2L:2008413-2009072	0	0	0	0.384612	0	0	0.48244	0	0	0	0	0.824998	NOTEST	0.20625	0.096153	-1.10099	0	1	1	no	NOTEST	0.20625	0.12061	-0.774043	0	1	1	no	NOTEST	0.096153	0.12061	0.326944	0	1	1	no
XLOC_000148	CG4238	TSS190,TSS191,TSS192,TSS193	chr2L:2009858-2030788	2.70695	2.83017	3.80446	3.94611	2.83915	2.81052	3.71618	3.01375	1.93208	1.77305	2.90645	2.17538	OK	2.19674	3.32192	0.596654	0.888689	0.0722	0.34102	no	OK	2.19674	3.0949	0.494529	0.731625	0.14175	0.505962	no	OK	3.32192	3.0949	-0.102125	-0.161807	0.74405	0.962052	no
XLOC_000149	Su(dx)	TSS194,TSS195,TSS196	chr2L:2037713-2044372	99.8168	106.619	55.7935	73.0713	65.4883	84.0151	73.7685	69.5318	80.4726	67.0141	56.6252	67.4609	OK	67.8932	83.8251	0.304115	0.825637	0.09545	0.406678	no	OK	67.8932	73.201	0.108596	0.300151	0.5511	0.897997	no	OK	83.8251	73.201	-0.195519	-0.53015	0.2952	0.710401	no
XLOC_000150	Kebab	TSS197	chr2L:2045493-2048054	0	0.806939	2.13477	1.25476	1.76098	1.57467	2.45608	1.53708	1.18673	1.13141	1.31893	1.06888	OK	1.17649	1.04912	-0.165313	-0.149706	0.8269	0.977342	no	OK	1.17649	1.8322	0.639091	0.65726	0.19715	0.596703	no	OK	1.04912	1.8322	0.804404	0.76443	0.31335	0.729601	no
XLOC_000151	Or22c	TSS198	chr2L:2054588-2057967	0	0.164758	0	0.0805089	0.321047	0.618991	0.36945	0.050266	0.878484	0.156214	0.29621	0.208443	NOTEST	0.384838	0.0613168	-2.6499	0	1	1	no	NOTEST	0.384838	0.339938	-0.178977	0	1	1	no	NOTEST	0.0613168	0.339938	2.47092	0	1	1	no
XLOC_000152	CG12674	TSS199	chr2L:2058789-2109878	0	0	0.266722	0	1.3817	2.90527	0.800581	0.623578	2.85052	1.00845	0.235151	0.469244	OK	1.14084	0.0666805	-4.09669	-1.10139	0.101	0.419278	no	OK	1.14084	1.42778	0.32368	0.232232	0.64995	0.934621	no	OK	0.0666805	1.42778	4.42037	1.19887	0.0944	0.40419	no
XLOC_000153	CR44808	TSS200	chr2L:2058789-2109878	0	0	0	0	0	0	0	0	0	0	0	0	NOTEST	0	0	0	0	1	1	no	NOTEST	0	0	0	0	1	1	no	NOTEST	0	0	0	0	1	1	no
XLOC_000154	CR44055	TSS201	chr2L:2058789-2109878	1.80735	0	0	0	0	0	0	0	0	0	0	0	NOTEST	0	0.451838	inf	0	1	1	no	NOTEST	0	0	0	0	1	1	no	NOTEST	0.451838	0	#NAME?	0	1	1	no
XLOC_000155	GlyP	TSS202	chr2L:2130812-2137296	54.9672	42.1743	56.1432	52.6992	56.5487	40.6955	44.6879	63.4019	43.4722	33.2801	48.9552	51.7476	OK	44.3638	51.496	0.215076	0.569688	0.24865	0.662735	no	OK	44.3638	51.3335	0.210517	0.555153	0.2639	0.676665	no	OK	51.496	51.3335	-0.00455903	-0.0121116	0.9799	0.996794	no
XLOC_000156	CG7261	TSS203	chr2L:2147517-2151664	37.2483	36.9644	26.0326	31.1517	22.0931	23.9179	26.7116	23.2767	25.8641	23.1005	23.2826	26.8283	OK	24.7689	32.8492	0.40733	1.05402	0.0348	0.212974	no	OK	24.7689	23.9998	-0.0455054	-0.116449	0.81345	0.975179	no	OK	32.8492	23.9998	-0.452835	-1.16914	0.0185	0.136899	no
XLOC_000157	AIF	TSS204	chr2L:2151753-2155389	14.8433	16.279	18.9888	16.0264	17.2816	18.0956	19.2044	16.7653	19.9543	27.4305	21.1333	17.8032	OK	21.5803	16.5344	-0.384248	-0.899569	0.06915	0.332596	no	OK	21.5803	17.8367	-0.274867	-0.649551	0.1994	0.599733	no	OK	16.5344	17.8367	0.109382	0.252203	0.6161	0.923666	no
XLOC_000158	CG15382	TSS205	chr2L:2155752-2178754	1.91067	1.97116	1.19255	0.913979	1.85881	1.53203	1.00347	1.35113	0.559979	1.16854	1.55658	0.906411	OK	1.04788	1.49709	0.514691	0.153082	0.784	0.96961	no	OK	1.04788	1.43636	0.454949	0.131869	0.8043	0.973334	no	OK	1.49709	1.43636	-0.0597417	-0.0196	0.973	0.996195	no
XLOC_000159	CR43751	TSS206	chr2L:2181961-2185495	0.186998	0	0	0.143067	0.0514669	0	0.0433879	0.0650304	0	0.0251215	0.0671155	0.0488714	NOTEST	0.0352771	0.0825161	1.22594	0	1	1	no	NOTEST	0.0352771	0.0399713	0.180232	0	1	1	no	NOTEST	0.0825161	0.0399713	-1.04571	0	1	1	no
XLOC_000160	CR44065	TSS207	chr2L:2189913-2192386	5.12556	7.97428	11.7488	8.886	6.281	6.16073	8.40843	7.94857	7.59728	10.7639	7.31121	7.59321	OK	8.3164	8.43367	0.0202013	0.0250128	0.9616	0.994712	no	OK	8.3164	7.19968	-0.208026	-0.255456	0.60805	0.920857	no	OK	8.43367	7.19968	-0.228228	-0.274551	0.58885	0.913928	no
XLOC_000161	CG34174	TSS208	chr2L:2214265-2216311	6.01545	16.4559	7.5472	6.5647	9.42193	7.73429	7.30711	5.83404	6.14947	11.7823	6.86882	4.70218	OK	7.3757	9.14582	0.310332	0.283673	0.58835	0.913597	no	OK	7.3757	7.57434	0.0383406	0.0348614	0.9481	0.993315	no	OK	9.14582	7.57434	-0.271991	-0.247141	0.6312	0.928982	no
XLOC_000162	mio	TSS209	chr2L:2217289-2220625	6.94701	5.90877	12.2332	9.78175	11.2366	12.2008	11.3434	10.6225	11.1983	12.7022	13.3073	11.6867	OK	12.2236	8.71769	-0.487654	-1.00751	0.04785	0.263691	no	OK	12.2236	11.3508	-0.106875	-0.231405	0.6431	0.933371	no	OK	8.71769	11.3508	0.380779	0.781237	0.1192	0.461312	no
XLOC_000163	papi	TSS210,TSS211,TSS212,TSS213	chr2L:2220747-2225544	10.0752	13.8564	17.9449	17.1492	17.2299	18.7572	17.4271	17.5987	18.3717	24.2177	19.3507	22.5079	OK	21.112	14.7564	-0.516719	-1.1386	0.02275	0.15925	no	OK	21.112	17.7532	-0.249979	-0.565329	0.25865	0.67187	no	OK	14.7564	17.7532	0.26674	0.581879	0.2387	0.653622	no
XLOC_000164	rti	TSS214,TSS215	chr2L:2226341-2231099	37.8397	49.1169	43.9436	39.8296	41.67	39.0856	41.4904	41.893	44.042	40.4907	39.0503	43.0244	OK	41.6519	42.6824	0.0352618	0.0830895	0.866	0.983972	no	OK	41.6519	41.0347	-0.021535	-0.0507266	0.91885	0.989736	no	OK	42.6824	41.0347	-0.0567967	-0.13367	0.79245	0.971072	no
XLOC_000165	CR44115	TSS216	chr2L:2231105-2237022	14.2575	15.0115	14.82	14.2507	20.2707	17.8397	16.4794	17.0011	11.9197	17.1233	15.9863	16.9828	OK	15.503	14.5849	-0.0880708	-0.0484569	0.9211	0.989887	no	OK	15.503	17.8977	0.207227	0.137576	0.76785	0.966985	no	OK	14.5849	17.8977	0.295297	0.171455	0.7055	0.952615	no
XLOC_000166	CG4267,CR42859	TSS217,TSS218	chr2L:2242377-2247383	42.6055	53.7151	59.3368	68.2049	65.3918	78.2969	69.1288	70.831	74.8273	96.7335	108.481	85.5622	OK	91.4009	55.9656	-0.707669	-1.7122	0.0007	0.0116489	yes	OK	91.4009	70.9121	-0.366177	-0.905774	0.06675	0.326373	no	OK	55.9656	70.9121	0.341492	0.820567	0.0973	0.411255	no
XLOC_000167	CG17234	TSS219	chr2L:2253044-2253852	0	0	0.310631	0.651963	0.436394	0.269222	0.653018	0.40667	0.0948725	0.127033	1.29315	0.584308	OK	0.524841	0.240648	-1.12495	-0.549495	0.37845	0.788784	no	OK	0.524841	0.441326	-0.250035	-0.127262	0.8027	0.973334	no	NOTEST	0.240648	0.441326	0.874918	0	1	1	no
XLOC_000168	CG4270	TSS220	chr2L:2263441-2265321	0	0	0	0.0803413	0	0	0.0832633	0	0.29026	0	0	0	NOTEST	0.0725649	0.0200853	-1.85313	0	1	1	no	NOTEST	0.0725649	0.0208158	-1.80159	0	1	1	no	NOTEST	0.0200853	0.0208158	0.0515404	0	1	1	no
XLOC_000169	CG4271	TSS221	chr2L:2285162-2286873	0	0	0	0.139904	0.750182	0.433873	0.0583922	0.261754	0.508985	0	0.56509	0.264073	NOTEST	0.334537	0.034976	-3.25773	0	1	1	no	NOTEST	0.334537	0.37605	0.168759	0	1	1	no	NOTEST	0.034976	0.37605	3.42649	0	1	1	no
XLOC_000170	CG31949	TSS222	chr2L:2300102-2300888	0	0	0	0	0	0.0821388	0	0.148285	0	0.0773885	0	0.109227	NOTEST	0.0466538	0	#NAME?	0	1	1	no	NOTEST	0.0466538	0.057606	0.304224	0	1	1	no	NOTEST	0	0.057606	inf	0	1	1	no
XLOC_000171	CG16995	TSS223	chr2L:2307947-2358944	0	0	3.51576	0.225965	0.101126	0.0779813	0.377278	0.469648	0	0	0	1.4579	OK	0.364475	0.93543	1.35981	0.344478	0.6547	0.935991	no	NOTEST	0.364475	0.256509	-0.506814	0	1	1	no	OK	0.93543	0.256509	-1.86662	-0.388153	0.4291	0.826786	no
XLOC_000172	eys	TSS224	chr2L:2307947-2358944	0.127468	0.182201	0.0920049	0.0709982	0.173534	0.118403	0.0465178	0.0475578	0.0488123	0.0880399	0.0374049	0.111881	NOTEST	0.0715344	0.118168	0.72413	0	1	1	no	NOTEST	0.0715344	0.0965031	0.431937	0	1	1	no	NOTEST	0.118168	0.0965031	-0.292193	0	1	1	no
XLOC_000173	Axud1	TSS225,TSS226	chr2L:2365344-2370137	20.2772	21.7261	20.2785	20.3636	19.3568	24.042	20.7573	21.1372	21.1337	18.3201	19.8828	20.6831	OK	20.0049	20.6613	0.0465778	0.117217	0.81695	0.975838	no	OK	20.0049	21.3233	0.0920768	0.23152	0.64595	0.933581	no	OK	20.6613	21.3233	0.0454991	0.114522	0.8177	0.975876	no
XLOC_000174	CG15390	TSS227	chr2L:2374712-2375697	0	0.901246	0.628305	0.219708	0.219948	0.45232	0.687587	0.856869	1.03899	1.33549	1.69588	0.595408	OK	1.16644	0.437315	-1.41537	-0.722498	0.39205	0.800093	no	OK	1.16644	0.554181	-1.07368	-0.538284	0.4622	0.847505	no	OK	0.437315	0.554181	0.341685	0.158671	0.8484	0.981241	no
XLOC_000175	Atxn7	TSS228,TSS229,TSS230	chr2L:2375840-2380506	5.32379	6.14369	7.54122	6.98434	6.65383	8.47679	7.63691	8.03609	8.42617	8.18787	8.93776	7.34114	OK	8.22323	6.49826	-0.339653	-0.668897	0.18415	0.576968	no	OK	8.22323	7.70091	-0.0946774	-0.191801	0.70425	0.952117	no	OK	6.49826	7.70091	0.244975	0.483113	0.3342	0.750907	no
XLOC_000176	Eogt	TSS231	chr2L:2381096-2383073	2.93439	3.32847	4.31338	3.80411	4.18429	3.90786	5.23354	2.97018	3.17126	4.24688	4.54897	4.34331	OK	4.07761	3.59509	-0.181696	-0.242993	0.6238	0.927052	no	OK	4.07761	4.07397	-0.00128768	-0.00179783	0.99655	0.998924	no	OK	3.59509	4.07397	0.180408	0.241331	0.6305	0.928882	no
XLOC_000177	CG9870	TSS232	chr2L:2383201-2384747	0.684727	1.42413	3.11223	1.23524	2.8559	1.52237	2.51016	1.6023	1.52055	1.68761	0.536353	1.28134	OK	1.25646	1.61408	0.361346	0.303769	0.55325	0.898682	no	OK	1.25646	2.12268	0.756523	0.685026	0.1826	0.574284	no	OK	1.61408	2.12268	0.395176	0.350675	0.4871	0.862764	no
XLOC_000178	VGlut	TSS233,TSS234,TSS235	chr2L:2391659-2416720	0	0	0	0	0	0	0.0122554	0	0	0	0	0	NOTEST	0	0	0	0	1	1	no	NOTEST	0	0.00306385	inf	0	1	1	no	NOTEST	0	0.00306385	inf	0	1	1	no
XLOC_000179	CG9886	TSS236	chr2L:2420829-2424647	1.38478	3.00235	3.04279	2.28834	1.19746	1.5932	1.90643	1.54172	1.91019	1.83781	2.16719	1.45712	OK	1.84308	2.42957	0.398582	0.449323	0.36465	0.776497	no	OK	1.84308	1.5597	-0.240847	-0.257605	0.6017	0.917971	no	OK	2.42957	1.5597	-0.639429	-0.690843	0.16265	0.542034	no
XLOC_000180	CG44139	TSS237	chr2L:2424796-2425041	0	0	0	0	0	0	0	0	0	0	0	0	NOTEST	0	0	0	0	1	1	no	NOTEST	0	0	0	0	1	1	no	NOTEST	0	0	0	0	1	1	no
XLOC_000181	dpp	TSS238,TSS239,TSS240,TSS241	chr2L:2428371-2459823	1.78728	0.193095	0.22847	0.382466	0.535288	0.337332	0.37185	0.477218	0.730935	0.130127	0.309288	0.279835	OK	0.362546	0.647827	0.837442	0.720309	0.17765	0.566371	no	NOTEST	0.362546	0.430422	0.247586	0	1	1	no	OK	0.647827	0.430422	-0.589856	-0.523227	0.3246	0.741443	no
XLOC_000182	oaf	TSS242	chr2L:2492954-2498846	23.6767	21.2611	19.2431	24.4855	21.706	20.6113	21.6391	20.8489	18.3992	21.616	20.4005	25.4625	OK	21.4695	22.1666	0.046095	0.11238	0.81975	0.976428	no	OK	21.4695	21.2013	-0.0181389	-0.043927	0.93	0.991132	no	OK	22.1666	21.2013	-0.0642339	-0.157484	0.7476	0.962612	no
XLOC_000183	CR44113	TSS243	chr2L:2555749-2556089	4.34626	0	0	0	0	0	0	0	0	0	0	0	OK	0	1.08656	inf	#NAME?	0.0979	0.412572	no	NOTEST	0	0	0	0	1	1	no	OK	1.08656	0	#NAME?	#NAME?	0.0976	0.412036	no
XLOC_000184	Elba2	TSS244	chr2L:2577686-2579179	2.62479	1.87726	2.90072	2.18543	2.26792	2.26736	1.53252	2.15618	1.88916	2.02513	2.02881	1.50483	OK	1.86198	2.39705	0.364418	0.376914	0.45165	0.840146	no	OK	1.86198	2.056	0.142998	0.14036	0.7823	0.969423	no	OK	2.39705	2.056	-0.221421	-0.226773	0.6459	0.933581	no
XLOC_000185	Arpc5	TSS245	chr2L:2580291-2585430	137.767	128.077	108.206	120.45	93.9042	109.144	97.6707	88.5381	120.889	128.411	104.954	95.7054	OK	112.49	123.625	0.13618	0.23985	0.62715	0.928128	no	OK	112.49	97.3143	-0.209069	-0.353985	0.4804	0.85844	no	OK	123.625	97.3143	-0.345249	-0.603495	0.22675	0.639309	no
XLOC_000186	CG15394	TSS246,TSS247	chr2L:2591868-2592773	0	0	0	0.1352	0.271671	0.515958	0.248042	0.246702	0	0	0	0.127572	NOTEST	0.0318931	0.0338	0.0837803	0	1	1	no	NOTEST	0.0318931	0.320593	3.32943	0	1	1	no	NOTEST	0.0338	0.320593	3.24565	0	1	1	no
XLOC_000187	CG15395	TSS248	chr2L:2609993-2611283	0	0	0	0	0	0	0	0	0	0	0	0	NOTEST	0	0	0	0	1	1	no	NOTEST	0	0	0	0	1	1	no	NOTEST	0	0	0	0	1	1	no
XLOC_000188	CG43403	TSS249	chr2L:2620186-2620782	0	0	0	0	0	0	0	0	0	0	0	0	NOTEST	0	0	0	0	1	1	no	NOTEST	0	0	0	0	1	1	no	NOTEST	0	0	0	0	1	1	no
XLOC_000189	CR43852	TSS250	chr2L:2646029-2646281	0	0	0	0	0	0	0	0	0	0	0	0	NOTEST	0	0	0	0	1	1	no	NOTEST	0	0	0	0	1	1	no	NOTEST	0	0	0	0	1	1	no
XLOC_000190	CG43851	TSS251	chr2L:2647885-2652414	0	0	0	0	0	0	0	0	0	0	0	0	NOTEST	0	0	0	0	1	1	no	NOTEST	0	0	0	0	1	1	no	NOTEST	0	0	0	0	1	1	no
XLOC_000191	Prosbeta4R1	TSS252	chr2L:2653045-2653926	0	0	0	0	0	0	0	0	0	0	0	0	NOTEST	0	0	0	0	1	1	no	NOTEST	0	0	0	0	1	1	no	NOTEST	0	0	0	0	1	1	no
XLOC_000192	Or23a,Prosbeta4R2	TSS253,TSS254	chr2L:2654048-2657102	0	0	0	0	0	0	0	0	0	0	0	0	NOTEST	0	0	0	0	1	1	no	NOTEST	0	0	0	0	1	1	no	NOTEST	0	0	0	0	1	1	no
XLOC_000193	CG9879	TSS255	chr2L:2665061-2666264	0	0	0	0	0	0	0	0	0	0	0	0	NOTEST	0	0	0	0	1	1	no	NOTEST	0	0	0	0	1	1	no	NOTEST	0	0	0	0	1	1	no
XLOC_000194	Gr23a	TSS256,TSS257	chr2L:2669822-2672186	0	0	0	0	0	0	0	0	0	0	0	0	NOTEST	0	0	0	0	1	1	no	NOTEST	0	0	0	0	1	1	no	NOTEST	0	0	0	0	1	1	no
XLOC_000195	CG31690	TSS258	chr2L:2677733-2719431	4.56919	3.00867	6.09283	2.61049	3.17353	0.890068	0.809309	3.74993	2.18684	1.20129	1.59186	1.39955	OK	1.59488	4.07029	1.35168	1.82377	0.0009	0.0141387	yes	OK	1.59488	2.15571	0.434712	0.537783	0.2775	0.69358	no	OK	4.07029	2.15571	-0.91697	-1.30965	0.0101	0.0885157	no
XLOC_000196	CG31689	TSS259,TSS260,TSS261,TSS262	chr2L:2725673-2739830	96.8648	91.3143	73.9868	70.9525	63.0149	40.2217	44.4016	63.7731	47.7008	33.666	57.3327	42.5286	OK	45.307	83.2796	0.878228	2.2924	5e-05	0.00129868	yes	OK	45.307	52.8528	0.222246	0.565517	0.26395	0.676732	no	OK	83.2796	52.8528	-0.655983	-1.71087	0.00095	0.0147702	yes
XLOC_000197	mir-4914	TSS263	chr2L:2725673-2739830	0	0	56.8895	0	0	0	0	41.6433	0	0	0	38.2215	NOTEST	9.55538	14.2224	0.573777	0	1	1	no	NOTEST	9.55538	10.4108	0.123701	0	1	1	no	NOTEST	14.2224	10.4108	-0.450076	0	1	1	no
XLOC_000198	Hrs	TSS264,TSS265	chr2L:2739985-2744934	105.656	102.816	71.1094	83.3915	69.8141	77.6823	71.1456	69.5887	68.2494	60.7427	70.2754	69.4842	OK	67.1879	90.7433	0.433589	1.17251	0.0196	0.142896	no	OK	67.1879	72.0577	0.10095	0.271321	0.58285	0.911635	no	OK	90.7433	72.0577	-0.332639	-0.903922	0.0695	0.333663	no
XLOC_000199	Cwc25	TSS266	chr2L:2745097-2758176	13.4588	13.6747	11.9049	10.5406	11.8219	14.3352	14.5348	11.8085	13.5737	10.7502	12.2587	10.1785	OK	11.6903	12.3947	0.0844172	0.040705	0.6681	0.941166	no	OK	11.6903	13.1251	0.167023	0.0843956	0.87725	0.98534	no	OK	12.3947	13.1251	0.0826056	0.0407196	0.66585	0.940472	no
XLOC_000200	Bacc	TSS267,TSS268,TSS269	chr2L:2745097-2758176	532.903	489.969	412.491	457.874	421.385	424.301	510.553	448.758	494.175	399.411	400.862	351.709	OK	411.539	473.309	0.201753	0.446007	0.3715	0.782734	no	OK	411.539	451.249	0.132895	0.295815	0.5523	0.898311	no	OK	473.309	451.249	-0.0688577	-0.155413	0.75395	0.963735	no
XLOC_000201	Trn-SR	TSS270	chr2L:2759923-2765665	4.43513	5.52157	9.20476	6.42396	7.18295	7.02744	6.49842	6.20257	6.3009	9.32606	7.71131	6.82226	OK	7.54013	6.39635	-0.23734	-0.273162	0.5707	0.906662	no	OK	7.54013	6.72784	-0.164445	-0.240786	0.6303	0.928882	no	OK	6.39635	6.72784	0.0728947	0.084872	0.85325	0.981712	no
XLOC_000202	aph-1	TSS271	chr2L:2766232-2767281	19.4835	15.3123	19.071	20.8715	15.6042	16.8543	14.2602	14.6755	20.2282	24.171	18.9156	15.9393	OK	19.8135	18.6846	-0.0846383	-0.147139	0.7668	0.966874	no	OK	19.8135	15.3485	-0.368383	-0.625803	0.2051	0.608602	no	OK	18.6846	15.3485	-0.283745	-0.481596	0.3322	0.748529	no
XLOC_000203	Taf10	TSS272	chr2L:2767889-2770069	25.8564	16.2378	28.7477	19.7057	21.6686	27.674	24.2942	20.6981	20.2589	28.1909	28.3626	20.2825	OK	24.2737	22.6369	-0.10072	-0.121723	0.80915	0.974596	no	OK	24.2737	23.5837	-0.0416032	-0.051983	0.9163	0.98972	no	OK	22.6369	23.5837	0.0591168	0.0725088	0.8826	0.985491	no
XLOC_000204	CG2862	TSS273	chr2L:2770134-2771776	256.773	162.091	185.954	217.053	195.363	210.828	193.801	171.256	203.819	227.432	193.918	175.206	OK	200.094	205.468	0.038238	0.0957011	0.8444	0.980781	no	OK	200.094	192.812	-0.0534805	-0.133949	0.78525	0.96961	no	OK	205.468	192.812	-0.0917185	-0.228229	0.64505	0.933371	no
XLOC_000205	CR43821	TSS274	chr2L:2772326-2799979	0	0	0	0	0.174726	0.269428	0	0.478555	0	0	0	0.121543	NOTEST	0.0303858	0	#NAME?	0	1	1	no	NOTEST	0.0303858	0.230677	2.9244	0	1	1	no	NOTEST	0	0.230677	inf	0	1	1	no
XLOC_000206	daw	TSS275,TSS276	chr2L:2805260-2812376	1.73776	1.66498	0.636186	1.35243	0.942951	1.00657	0.747771	0.774188	2.65964	1.12717	1.60879	2.12938	OK	1.88125	1.34784	-0.481042	-0.54094	0.2794	0.695596	no	OK	1.88125	0.867869	-1.11614	-1.16726	0.02405	0.165676	no	OK	1.34784	0.867869	-0.635097	-0.643108	0.20155	0.603322	no
XLOC_000207	CG2964	TSS277	chr2L:2812436-2815760	0.9443	0	0.0682751	0	0	0.0730106	0	0.0148998	0.0346936	0	0	0.0224238	NOTEST	0.0142794	0.253144	4.14795	0	1	1	no	NOTEST	0.0142794	0.0219776	0.622104	0	1	1	no	NOTEST	0.253144	0.0219776	-3.52585	0	1	1	no
XLOC_000208	Cpr23B	TSS278	chr2L:2838410-2839547	0	0	0	0	0	0	0	0	0	0	0	0	NOTEST	0	0	0	0	1	1	no	NOTEST	0	0	0	0	1	1	no	NOTEST	0	0	0	0	1	1	no
XLOC_000209	CG2975	TSS279	chr2L:2840024-2844513	0	0	0	0	0	0	0	0.0458915	0	0	0	0	NOTEST	0	0	0	0	1	1	no	NOTEST	0	0.0114729	inf	0	1	1	no	NOTEST	0	0.0114729	inf	0	1	1	no
XLOC_000210	CG2983	TSS280	chr2L:2847631-2855778	0	0	0	0	0	0	0	0.0459742	0	0	0	0.051973	NOTEST	0.0129933	0	#NAME?	0	1	1	no	NOTEST	0.0129933	0.0114936	-0.176938	0	1	1	no	NOTEST	0	0.0114936	inf	0	1	1	no
XLOC_000211	RpS21	TSS281	chr2L:2856069-2857029	2647.8	2484.23	3382	3672.19	3020.89	3080.6	2897.31	3033.46	3326.69	3434.96	3593.91	3835.57	OK	3547.78	3046.56	-0.219738	-0.605046	0.21925	0.629195	no	OK	3547.78	3008.06	-0.238082	-0.656741	0.1838	0.576409	no	OK	3046.56	3008.06	-0.0183447	-0.0502563	0.9194	0.989854	no
XLOC_000212	CG2991	TSS282,TSS283	chr2L:2857163-2868548	74.6854	69.1111	54.4219	61.2986	60.3715	63.0398	54.5111	62.0028	57.1586	59.696	55.2164	47.375	OK	54.8615	64.8792	0.241962	0.650945	0.1923	0.59001	no	OK	54.8615	59.9813	0.128719	0.345516	0.4919	0.866494	no	OK	64.8792	59.9813	-0.113244	-0.305301	0.54495	0.894592	no
XLOC_000213	CG8813	TSS284	chr2L:2868626-2874489	2.18447	2.1693	1.34542	5.29199	2.08279	2.17619	1.8085	1.73004	0.953319	1.12653	1.29715	3.01561	OK	1.59815	2.7478	0.781871	0.167409	0.62145	0.925797	no	OK	1.59815	1.94938	0.286611	0.0594706	0.84045	0.980319	no	OK	2.7478	1.94938	-0.49526	-0.111055	0.7431	0.961931	no
XLOC_000214	CG8814	TSS285	chr2L:2874889-2878232	15.5268	9.38981	16.4594	11.9762	16.5084	15.199	15.2777	12.6746	15.6457	13.4769	11.7869	11.702	OK	13.1529	13.3381	0.0201729	0.0310971	0.94795	0.993315	no	OK	13.1529	14.9149	0.181381	0.301864	0.54735	0.896014	no	OK	13.3381	14.9149	0.161208	0.252779	0.6122	0.922377	no
XLOC_000215	CG31950	TSS286	chr2L:2878343-2879001	7.38971	10.3164	13.4154	14.2575	10.2827	14.2723	12.7545	14.3879	15.4394	14.6828	16.1882	10.2645	OK	14.1437	11.3447	-0.318138	-0.42267	0.3805	0.789414	no	OK	14.1437	12.9244	-0.130069	-0.173343	0.7222	0.95706	no	OK	11.3447	12.9244	0.188069	0.241945	0.61455	0.922749	no
XLOC_000216	betaggt-II	TSS287	chr2L:2879111-2885850	23.6663	21.3575	20.5339	18.507	19.1391	22.8028	18.6493	17.1299	21.9542	20.3119	19.8755	20.2226	OK	20.591	21.0162	0.0294827	0.0226618	0.95815	0.993951	no	OK	20.591	19.4303	-0.08371	-0.0606355	0.89295	0.987025	no	OK	21.0162	19.4303	-0.113193	-0.110929	0.81575	0.975542	no
XLOC_000217	lilli	TSS288,TSS289,TSS290,TSS291	chr2L:2885928-2954406	39.1354	36.9479	29.5677	39.2874	32.9972	33.9277	37.3769	29.6553	36.7004	31.0274	30.9001	44.8358	OK	35.866	36.2346	0.0147526	0.0388099	0.93815	0.992823	no	OK	35.866	33.4893	-0.0989159	-0.261342	0.6012	0.917719	no	OK	36.2346	33.4893	-0.113668	-0.299638	0.549	0.896868	no
XLOC_000218	Rbp9	TSS292,TSS293,TSS294	chr2L:2954761-2969638	8.39515	8.41024	6.21764	3.25779	3.36657	1.94272	1.34978	3.86104	2.37893	1.83747	2.15496	1.81957	OK	2.04773	6.57021	1.68191	1.98014	0.00255	0.0316242	yes	OK	2.04773	2.63003	0.36105	0.264903	0.6262	0.927441	no	OK	6.57021	2.63003	-1.32086	-1.08245	0.098	0.41269	no
XLOC_000219	gammaTub23C	TSS295	chr2L:2972890-2974858	20.5927	17.1362	20.6175	18.4844	21.5881	14.9415	21.7113	16.3538	17.4054	15.4459	15.4371	14.8796	OK	15.792	19.2077	0.28249	0.592525	0.2321	0.645303	no	OK	15.792	18.6487	0.239879	0.501828	0.3056	0.721774	no	OK	19.2077	18.6487	-0.0426117	-0.0909583	0.8531	0.981712	no
XLOC_000220	CG3165	TSS296	chr2L:2977121-2979288	45.934	53.8354	28.3208	33.7094	33.2186	41.6091	35.6307	30.0666	34.626	29.6514	24.2139	29.2627	OK	29.4385	40.4499	0.458432	0.908627	0.07135	0.338626	no	OK	29.4385	35.1313	0.255051	0.507657	0.31545	0.731933	no	OK	40.4499	35.1313	-0.203381	-0.416691	0.4072	0.812075	no
XLOC_000221	Bem46	TSS297	chr2L:2988115-2992759	5.10013	4.6728	5.48331	5.39279	7.43051	6.48189	7.22496	5.32523	4.16026	5.56329	5.81716	5.03341	OK	5.14353	5.16226	0.00524413	0.0058579	0.99095	0.998169	no	OK	5.14353	6.61565	0.363124	0.434372	0.3908	0.799036	no	OK	5.16226	6.61565	0.35788	0.427744	0.3918	0.800064	no
XLOC_000222	CG3558	TSS298,TSS299	chr2L:2992869-2998726	44.333	51.5872	27.263	35.5165	26.3404	30.889	26.6817	29.7278	29.6313	30.7676	28.7335	30.5226	OK	29.9137	39.6749	0.407419	1.0633	0.03635	0.219735	no	OK	29.9137	28.4097	-0.0744229	-0.192357	0.7052	0.952614	no	OK	39.6749	28.4097	-0.481842	-1.25351	0.01285	0.105449	no
XLOC_000223	CG17265	TSS300	chr2L:2999285-3016069	5.33279	5.88109	8.13302	7.05008	5.62008	4.33467	5.94787	6.201	7.40406	7.1643	9.60145	6.26513	OK	7.60874	6.59925	-0.205356	-0.396664	0.43115	0.828353	no	OK	7.60874	5.52591	-0.461446	-0.868414	0.0765	0.352886	no	OK	6.59925	5.52591	-0.25609	-0.47528	0.329	0.745712	no
XLOC_000224	CG17264	TSS301,TSS302	chr2L:3018507-3023141	11.2625	16.8716	11.7861	13.6109	13.2599	21.3525	19.3473	13.8467	6.05024	14.1416	16.977	11.1082	OK	12.0693	13.3827	0.149038	0.247776	0.6272	0.928154	no	OK	12.0693	16.9516	0.490084	0.833331	0.10385	0.425859	no	OK	13.3827	16.9516	0.341047	0.624934	0.2159	0.624781	no
XLOC_000225	CG3542	TSS303	chr2L:3023225-3029168	13.3186	12.0646	12.1185	13.0954	16.7169	17.0712	16.4213	14.3987	13.2803	16.8842	14.4331	14.4559	OK	14.7634	12.6493	-0.222967	-0.357225	0.4721	0.85334	no	OK	14.7634	16.152	0.129693	0.211025	0.6738	0.942652	no	OK	12.6493	16.152	0.35266	0.571553	0.25485	0.667887	no
XLOC_000226	CG17219,GABPI	TSS304,TSS305	chr2L:3029252-3035348	29.5143	25.8955	21.4771	21.7966	20.4185	20.8238	22.1063	19.8936	23.679	18.5333	19.4814	21.5862	OK	20.82	24.6709	0.24484	0.490723	0.3337	0.750078	no	OK	20.82	20.8106	-0.000652809	-0.00127686	0.99805	0.999167	no	OK	24.6709	20.8106	-0.245493	-0.501964	0.32075	0.737357	no
XLOC_000227	CG17260	TSS306,TSS307	chr2L:3035492-3038793	8.77348	11.639	6.521	8.34764	14.3213	14.2764	14.4489	8.18098	16.5548	11.2525	7.27354	16.9538	OK	13.0087	8.82029	-0.560574	-0.420899	0.42615	0.825284	no	OK	13.0087	12.8069	-0.0225524	-0.016478	0.97685	0.996785	no	OK	8.82029	12.8069	0.538022	0.414467	0.4438	0.836211	no
XLOC_000228	CG17221	TSS308,TSS309	chr2L:3039975-3041890	6.82275	7.75249	7.64408	5.54465	8.4806	5.98526	6.20616	5.3754	6.93578	5.12622	5.94315	6.2558	OK	6.06524	6.94099	0.194578	0.279659	0.5763	0.908639	no	OK	6.06524	6.51185	0.102505	0.147041	0.7717	0.967536	no	OK	6.94099	6.51185	-0.0920736	-0.132938	0.7919	0.971072	no
XLOC_000229	CG17261	TSS310,TSS311	chr2L:3042550-3043593	6.56321	1.95658	0.397503	0.595993	2.33942	2.50232	1.42724	0.558773	1.64725	2.34391	1.44219	1.09737	OK	1.63268	2.37832	0.542703	0.374606	0.4721	0.85334	no	OK	1.63268	1.70694	0.0641686	0.0482174	0.92965	0.991108	no	OK	2.37832	1.70694	-0.478534	-0.338834	0.5266	0.885234	no
XLOC_000230	v(2)k05816	TSS312	chr2L:3043946-3056143	3.35347	3.59483	1.73724	3.81222	3.93679	5.20543	3.77123	3.45321	4.27151	4.11417	3.85031	4.39557	OK	4.15789	3.12444	-0.412254	-0.837882	0.09265	0.399145	no	OK	4.15789	4.09167	-0.0231633	-0.0490119	0.9207	0.989854	no	OK	3.12444	4.09167	0.38909	0.784393	0.11615	0.454423	no
XLOC_000231	CR43708	TSS313	chr2L:3043946-3056143	0	39.0058	0	0	7.75177	6.58164	4.74891	4.74971	0	10.9479	5.34148	7.97129	OK	6.06516	9.75144	0.68507	0.347955	0.7466	0.962435	no	OK	6.06516	5.95801	-0.0257157	-0.00440351	0.94605	0.993315	no	OK	9.75144	5.95801	-0.710785	-0.127873	0.72065	0.956955	no
XLOC_000232	snRNA:U5:23D	TSS314	chr2L:3043946-3056143	0	0	0	0	0	0	12.1974	0	0	0	0	2.69802	NOTEST	0.674505	0	#NAME?	0	1	1	no	NOTEST	0.674505	3.04934	2.1766	0	1	1	no	NOTEST	0	3.04934	inf	0	1	1	no
XLOC_000233	CG3523	TSS315,TSS316	chr2L:3056597-3068177	79.3012	79.8286	83.912	79.2651	107.732	127.397	114.864	103.61	116.544	96.8993	107.125	88.078	OK	102.162	80.5767	-0.342418	-0.963307	0.05235	0.28013	no	OK	102.162	113.401	0.150575	0.422953	0.3921	0.800093	no	OK	80.5767	113.401	0.492993	1.38872	0.00435	0.0480734	yes
XLOC_000234	PpD6	TSS317	chr2L:3068344-3144786	0	0	0	0	0	0	0	0.0903755	0	0	0	0	HIDATA	0	0	0	0	1	1	no	HIDATA	0	0.0225939	0	0	1	1	no	NOTEST	0	0.0225939	inf	0	1	1	no
XLOC_000235	CG15403	TSS318	chr2L:3068344-3144786	0	0	0	0	0	0	0	0	0	0	0	0	HIDATA	0	0	0	0	1	1	no	HIDATA	0	0	0	0	1	1	no	NOTEST	0	0	0	0	1	1	no
XLOC_000236	gkt	TSS319	chr2L:3159949-3162399	14.2954	8.81729	9.46026	11.9403	10.1249	10.6695	9.60053	9.94314	9.41437	11.526	13.8079	10.9154	OK	11.4159	11.1283	-0.0368141	-0.0722153	0.8824	0.985491	no	OK	11.4159	10.0845	-0.178905	-0.345122	0.48315	0.859972	no	OK	11.1283	10.0845	-0.142091	-0.273943	0.58145	0.910767	no
XLOC_000237	Hydr2	TSS320	chr2L:3163644-3169462	157.209	163.114	100.486	136.343	130.479	147.793	136.274	159.212	163.255	185.894	172.063	144.838	OK	166.512	139.288	-0.25756	-0.709442	0.15585	0.529672	no	OK	166.512	143.44	-0.215185	-0.596012	0.23015	0.643444	no	OK	139.288	143.44	0.042375	0.116632	0.8188	0.976307	no
XLOC_000238	CG15404	TSS321	chr2L:3173971-3174504	0	0	0	0	0	0	0	0	0	0	0	0	NOTEST	0	0	0	0	1	1	no	NOTEST	0	0	0	0	1	1	no	NOTEST	0	0	0	0	1	1	no
XLOC_000239	CR45336	TSS322	chr2L:3210514-3211156	0	0	0	0	0	0	0	0	0	0	0	0	NOTEST	0	0	0	0	1	1	no	NOTEST	0	0	0	0	1	1	no	NOTEST	0	0	0	0	1	1	no
XLOC_000240	CR44484	TSS323	chr2L:3268268-3268646	0	0	0	0	0	0	0	0	0	0	0	0	NOTEST	0	0	0	0	1	1	no	NOTEST	0	0	0	0	1	1	no	NOTEST	0	0	0	0	1	1	no
XLOC_000241	CG3347	TSS324,TSS325	chr2L:3269436-3271806	0	0	0	0	0	0	0	0	0	0	0	0	NOTEST	0	0	0	0	1	1	no	NOTEST	0	0	0	0	1	1	no	NOTEST	0	0	0	0	1	1	no
XLOC_000242	CR44485	TSS326	chr2L:3287821-3288591	0	0	0	0	0	0.143172	0.0578164	0.129591	0	0	0.0508682	0.130729	NOTEST	0.0453993	0	#NAME?	0	1	1	no	NOTEST	0.0453993	0.082645	0.864258	0	1	1	no	NOTEST	0	0.082645	inf	0	1	1	no
XLOC_000243	CG3277	TSS327	chr2L:3304099-3319872	18.0753	14.1407	23.59	19.1862	14.4747	11.2029	16.0117	21.0786	15.6111	13.5859	23.1449	18.5133	OK	17.7138	18.7481	0.0818676	0.172925	0.72975	0.958802	no	OK	17.7138	15.692	-0.174846	-0.371204	0.4548	0.841864	no	OK	18.7481	15.692	-0.256714	-0.54031	0.27785	0.694031	no
XLOC_000244	CG15406	TSS328	chr2L:3304099-3319872	2.25107	1.04465	1.16556	1.22163	0.715108	1.1611	0.97168	1.10024	1.85982	1.43041	1.06702	1.09559	OK	1.36321	1.42073	0.0596234	0.0243044	0.9708	0.99583	no	OK	1.36321	0.987034	-0.465835	-0.177741	0.82105	0.976763	no	OK	1.42073	0.987034	-0.525459	-0.201031	0.8021	0.973334	no
XLOC_000245	CG8837	TSS329	chr2L:3320244-3323141	2.17742	1.74946	1.17822	1.00794	0.400079	0.257045	0.252051	0.314608	0.0732598	0.316778	0.334151	0.367111	OK	0.272825	1.52826	2.48584	1.8252	0.0097	0.0859576	no	NOTEST	0.272825	0.305946	0.165299	0	1	1	no	OK	1.52826	0.305946	-2.32055	-1.92833	0.00875	0.0798378	no
XLOC_000246	CG33281	TSS330	chr2L:3324236-3326637	3.49959	0.781964	0.505594	0.529934	0.429156	0.391163	0.171919	0.275835	0.51395	0	0.173436	0.276936	OK	0.24108	1.32927	2.46305	1.60921	0.00905	0.0817413	no	NOTEST	0.24108	0.317018	0.395051	0	1	1	no	OK	1.32927	0.317018	-2.068	-1.48894	0.00275	0.0335951	yes
XLOC_000247	CG33282	TSS331	chr2L:3327902-3329792	0	0	0.0849167	0.118674	0	0.181945	0.148499	0.148249	0	0.22986	0.0436938	0.16745	NOTEST	0.110251	0.0508977	-1.11512	0	1	1	no	NOTEST	0.110251	0.119673	0.11831	0	1	1	no	NOTEST	0.0508977	0.119673	1.23343	0	1	1	no
XLOC_000248	CG15408,CG3285	TSS332,TSS333	chr2L:3330927-3334790	0.32474	0	0.0561244	0.0300486	14.8685	16.3282	12.9392	3.76088	8.13694	4.91807	1.27389	4.00013	OK	4.58226	0.102728	-5.47915	-2.76858	0.02965	0.191617	no	OK	4.58226	11.9742	1.3858	2.0193	0.00045	0.00814181	yes	OK	0.102728	11.9742	6.86495	3.55432	0.0296	0.191424	no
XLOC_000249	CG8838	TSS334	chr2L:3357645-3358618	0	0.958542	0	0.155854	0	0.160296	0	0.0324216	0	0.151501	0.0381982	0.146874	NOTEST	0.0841432	0.278599	1.72727	0	1	1	no	NOTEST	0.0841432	0.0481795	-0.804426	0	1	1	no	NOTEST	0.278599	0.0481795	-2.5317	0	1	1	no
XLOC_000250	Ptpa	TSS335	chr2L:3377001-3378590	4.31984	7.28145	11.4655	10.0675	9.54242	9.53219	9.11328	9.87979	9.46535	8.4962	12.3267	7.33088	OK	9.40477	8.28357	-0.18314	-0.287087	0.5476	0.896064	no	OK	9.40477	9.51692	0.0171013	0.0275997	0.9553	0.993716	no	OK	8.28357	9.51692	0.200242	0.31533	0.5029	0.87409	no
XLOC_000251	CR44791	TSS336	chr2L:3389347-3389753	0	0	0	0	0	0	0	0	0	0	0	0	NOTEST	0	0	0	0	1	1	no	NOTEST	0	0	0	0	1	1	no	NOTEST	0	0	0	0	1	1	no
XLOC_000252	CG34175	TSS337	chr2L:3398022-3398684	0	0	0	0	0	0	0	0.157428	0	0	0	0.0397734	NOTEST	0.00994334	0	#NAME?	0	1	1	no	NOTEST	0.00994334	0.0393569	1.98482	0	1	1	no	NOTEST	0	0.0393569	inf	0	1	1	no
XLOC_000253	CG8840	TSS338	chr2L:3404459-3426719	0	0	0	0	0	0	0	0	0	0	0	0	NOTEST	0	0	0	0	1	1	no	NOTEST	0	0	0	0	1	1	no	NOTEST	0	0	0	0	1	1	no
XLOC_000254	CG31952	TSS339	chr2L:3404459-3426719	0	0	0	0	0	0.0425807	0	0	0	0	0	0	NOTEST	0	0	0	0	1	1	no	NOTEST	0	0.0106452	inf	0	1	1	no	NOTEST	0	0.0106452	inf	0	1	1	no
XLOC_000255	CG2772	TSS340	chr2L:3445991-3447589	0	0	1.26501	0	0	0.0366986	0	0	0	0	0	0.0337336	NOTEST	0.0084334	0.316252	5.22882	0	1	1	no	NOTEST	0.0084334	0.00917465	0.12154	0	1	1	no	NOTEST	0.316252	0.00917465	-5.10728	0	1	1	no
XLOC_000256	Snx1	TSS341	chr2L:3449682-3452106	71.8114	73.1498	46.4191	54.3927	55.0853	59.9876	61.5821	57.9802	47.9856	54.7871	53.6019	52.2342	OK	52.1522	61.4433	0.236527	0.615988	0.221	0.631243	no	OK	52.1522	58.6588	0.169619	0.441035	0.37825	0.788655	no	OK	61.4433	58.6588	-0.0669073	-0.174288	0.72185	0.957038	no
XLOC_000257	CG12795	TSS342	chr2L:3452465-3457064	28.9197	36.6128	20.8851	24.45	34.1589	30.3853	32.303	21.043	17.9216	16.4144	18.0863	23.3795	OK	18.9505	27.7169	0.548535	0.764454	0.1289	0.482036	no	OK	18.9505	29.4725	0.637139	0.934176	0.0639	0.318365	no	OK	27.7169	29.4725	0.088604	0.134604	0.7941	0.971223	no
XLOC_000258	Sec5	TSS343	chr2L:3457301-3461952	12.1963	8.65259	9.65415	8.36391	7.74851	7.83693	8.74547	7.73395	9.01189	8.55974	8.69914	8.03324	OK	8.576	9.71674	0.180167	0.358736	0.4635	0.848421	no	OK	8.576	8.01621	-0.0973842	-0.188847	0.70215	0.951458	no	OK	9.71674	8.01621	-0.277551	-0.549182	0.26485	0.677704	no
XLOC_000259	Pdsw	TSS344	chr2L:3466156-3467334	143.474	101.415	118.319	133.839	112.487	130.938	109.636	94.1594	138.479	134.756	116.218	117.93	OK	126.846	124.262	-0.0296922	-0.0721879	0.8887	0.98629	no	OK	126.846	111.805	-0.182087	-0.437713	0.38555	0.794557	no	OK	124.262	111.805	-0.152395	-0.366457	0.4651	0.849882	no
XLOC_000260	CG31776	TSS345	chr2L:3470181-3472364	0	0	0.290284	0.631794	1.23824	0.764	0.605072	0.994098	0.680786	0.498031	0.930853	0.638007	OK	0.686919	0.23052	-1.57525	-1.01439	0.04805	0.264488	no	OK	0.686919	0.900352	0.390348	0.329881	0.5039	0.874765	no	OK	0.23052	0.900352	1.9656	1.27669	0.02025	0.146405	no
XLOC_000261	CR45372,pgant4	TSS346,TSS347,TSS348	chr2L:3472602-3476058	2.04156	0	0.308027	0.927076	0.272511	1.00286	0.519634	1.14425	1.19982	1.21602	1.23261	1.40941	OK	1.26447	0.819165	-0.626302	-0.447461	0.4442	0.836273	no	OK	1.26447	0.734814	-0.783076	-0.64601	0.15315	0.524841	no	OK	0.819165	0.734814	-0.156774	-0.106105	0.84895	0.981282	no
XLOC_000262	CR43928	TSS349,TSS350	chr2L:3476342-3477648	0	0	0	0.587441	0.20762	0.120091	0.228135	0.363919	1.07393	0.303112	0.804882	0.330952	OK	0.628218	0.14686	-2.09682	-0.888972	0.22515	0.637309	no	OK	0.628218	0.229941	-1.45	-0.774691	0.14195	0.50616	no	NOTEST	0.14686	0.229941	0.646822	0	1	1	no
XLOC_000263	Thor	TSS351	chr2L:3478433-3479612	829.388	801.694	470.13	527.474	549.621	663.95	569.421	637.699	854.207	746.511	694.223	902.815	OK	799.439	657.172	-0.282718	-0.777174	0.11385	0.448737	no	OK	799.439	605.173	-0.401641	-1.11474	0.02675	0.178394	no	OK	657.172	605.173	-0.118923	-0.327218	0.50685	0.876618	no
XLOC_000264	CR45299	TSS352	chr2L:3508597-3509036	3.33027	3.47216	3.7462	5.45934	1.87333	1.60474	2.15473	3.58288	2.8711	4.198	2.54751	1.29675	OK	2.72834	4.00199	0.552697	0.419923	0.39205	0.800093	no	OK	2.72834	2.30392	-0.243932	-0.171471	0.72465	0.957867	no	OK	4.00199	2.30392	-0.796629	-0.589158	0.2086	0.613455	no
XLOC_000265	CR45300	TSS353	chr2L:3509057-3510102	15.4707	3.4269	4.84017	3.01828	3.26386	1.51028	1.35953	4.31951	0	2.09674	2.02411	0.55522	OK	1.16902	6.68901	2.5165	1.12125	0.30505	0.721547	no	OK	1.16902	2.61329	1.16057	0.519645	0.5455	0.894858	no	OK	6.68901	2.61329	-1.35592	-0.66534	0.3274	0.744039	no
XLOC_000266	CG17593	TSS354	chr2L:3514871-3517264	27.2175	34.2671	28.1264	28.0002	22.3064	31.5058	31.0985	25.3076	29.5714	33.8527	28.4397	24.6187	OK	29.1207	29.4028	0.0139104	0.0322175	0.9494	0.993315	no	OK	29.1207	27.5546	-0.0797519	-0.183732	0.7103	0.954369	no	OK	29.4028	27.5546	-0.0936623	-0.215626	0.66675	0.940766	no
XLOC_000267	CG8851	TSS355,TSS356	chr2L:3519676-3524056	0.933406	0.407172	0.30475	0.459024	0.580282	0.774894	0.64621	0.261874	0.290309	0.297672	0.83822	0.680768	OK	0.526742	0.526088	-0.00179271	-0.0011101	0.9954	0.998646	no	OK	0.526742	0.565815	0.103234	0.0697218	0.89505	0.987025	no	OK	0.526088	0.565815	0.105027	0.0669673	0.8988	0.987025	no
XLOC_000268	CG8852	TSS357	chr2L:3525130-3530317	0	0	0.180006	0.660113	0.423619	0.326724	0.456195	0.424264	0.658436	0.255253	0.30576	0.389967	NOTEST	0.402354	0.21003	-0.937873	0	1	1	no	NOTEST	0.402354	0.4077	0.019043	0	1	1	no	NOTEST	0.21003	0.4077	0.956916	0	1	1	no
XLOC_000269	Che-13	TSS358	chr2L:3530788-3532678	0	1.30351	0.638843	0.733431	1.64919	0.750103	0.399038	1.27462	1.25255	0.092681	0.845207	0.525031	OK	0.678866	0.668947	-0.0212362	-0.0153705	0.974	0.996334	no	OK	0.678866	1.01824	0.584873	0.449297	0.3547	0.768029	no	OK	0.668947	1.01824	0.606109	0.468333	0.32835	0.744897	no
XLOC_000270	CR44308	TSS359	chr2L:3537843-3538333	0	0	0.301067	0	0	0	0	0	0	0	0.231384	0.52728	NOTEST	0.189666	0.0752668	-1.33338	0	1	1	no	NOTEST	0.189666	0	#NAME?	0	1	1	no	NOTEST	0.0752668	0	#NAME?	0	1	1	no
XLOC_000271	drm	TSS360,TSS361	chr2L:3539246-3548423	39.4044	41.7925	24.9199	45.9125	65.9954	63.6692	84.4871	53.5096	33.4868	39.5275	42.7569	55.8982	OK	42.9174	38.0073	-0.175283	-0.437142	0.37865	0.788971	no	OK	42.9174	66.9153	0.640776	1.63556	0.00125	0.0183387	yes	OK	38.0073	66.9153	0.816059	2.07824	5e-05	0.00129868	yes
XLOC_000272	CR44309	TSS362	chr2L:3562037-3563118	0	0	0	0	0	0	0.0402766	0	0	0	0	0	NOTEST	0	0	0	0	1	1	no	NOTEST	0	0.0100692	inf	0	1	1	no	NOTEST	0	0.0100692	inf	0	1	1	no
XLOC_000273	CR43822	TSS363	chr2L:3575349-3575806	0	0	0	0.142443	0	0.300661	0.119039	0	0	0	0.312308	0.135234	NOTEST	0.111886	0.0356109	-1.65164	0	1	1	no	NOTEST	0.111886	0.104925	-0.0926658	0	1	1	no	NOTEST	0.0356109	0.104925	1.55897	0	1	1	no
XLOC_000274	CG43815	TSS364	chr2L:3576209-3576623	0	0	0	0	0	0	0	0	0	0	0	0	NOTEST	0	0	0	0	1	1	no	NOTEST	0	0	0	0	1	1	no	NOTEST	0	0	0	0	1	1	no
XLOC_000275	CR44310	TSS365	chr2L:3616295-3617619	0	0	1.90302	0.870591	0.818776	0.148579	0.453959	1.24584	0.686058	0.633041	1.41508	0.734027	OK	0.867051	0.693404	-0.322421	-0.193811	0.70335	0.951778	no	OK	0.867051	0.666788	-0.378889	-0.262345	0.59445	0.915767	no	OK	0.693404	0.666788	-0.0564674	-0.0340473	0.9488	0.993315	no
XLOC_000276	Dot	TSS366,TSS367	chr2L:3619096-3621681	7.79585	9.45014	6.22096	5.62792	8.27804	9.06467	7.42487	5.66243	5.62924	7.96354	4.47916	4.60546	OK	5.66935	7.27372	0.359509	0.534634	0.2936	0.708995	no	OK	5.66935	7.6075	0.424239	0.637182	0.2126	0.620184	no	OK	7.27372	7.6075	0.0647302	0.1015	0.836	0.979177	no
XLOC_000277	CG34340	TSS368	chr2L:3662744-3692114	0	0	0	0.0344264	0	0	0.0287131	0.0107557	0	0.049907	0	0.00808692	NOTEST	0.0144985	0.0086066	-0.752385	0	1	1	no	NOTEST	0.0144985	0.0098672	-0.555189	0	1	1	no	NOTEST	0.0086066	0.0098672	0.197196	0	1	1	no
XLOC_000278	CG42464	TSS369	chr2L:3699463-3699826	2.24528	0	0	0.600168	0	0	0	0	0	0	1.51976	0.866179	NOTEST	0.596485	0.711362	0.254097	0	1	1	no	NOTEST	0.596485	0	#NAME?	0	1	1	no	NOTEST	0.711362	0	#NAME?	0	1	1	no
XLOC_000279	CG42465,Sfp24C1	TSS370,TSS371	chr2L:3700194-3701092	0	0	0.195102	0	0.485377	0.224223	0.146794	0.218142	0	0	0	0.0994438	NOTEST	0.024861	0.0487754	0.972273	0	1	1	no	NOTEST	0.024861	0.268634	3.43369	0	1	1	no	NOTEST	0.0487754	0.268634	2.46142	0	1	1	no
XLOC_000280	CG42467	TSS372	chr2L:3701289-3701699	0	0	0	0	0	0.226584	0.527936	0.39169	0	0	0.30615	0.301338	NOTEST	0.151872	0	#NAME?	0	1	1	no	NOTEST	0.151872	0.286553	0.915944	0	1	1	no	NOTEST	0	0.286553	inf	0	1	1	no
XLOC_000281	CG43145	TSS373	chr2L:3701825-3702248	0	0	0	0	1.76314	0	0.351958	0.913944	0	1.0512	0	0.703122	NOTEST	0.438582	0	#NAME?	0	1	1	no	OK	0.438582	0.757262	0.787946	0.399713	0.54935	0.897133	no	OK	0	0.757262	inf	#NAME?	0.00035	0.00662569	yes
XLOC_000282	CR44311	TSS374	chr2L:3702613-3702947	0	0	0.919654	0	0.684563	0.264006	0.203043	0.300953	0	0.73216	0.528636	0.580939	NOTEST	0.460434	0.229914	-1.0019	0	1	1	no	NOTEST	0.460434	0.363141	-0.342462	0	1	1	no	NOTEST	0.229914	0.363141	0.659439	0	1	1	no
XLOC_000283	CG2816	TSS375	chr2L:3703658-3705488	0	0	0	0.332074	0	0.231518	0.369835	0	0	0	0	0.209631	NOTEST	0.0524078	0.0830185	0.663652	0	1	1	no	NOTEST	0.0524078	0.150338	1.52036	0	1	1	no	NOTEST	0.0830185	0.150338	0.856707	0	1	1	no
XLOC_000284	CG2818	TSS376,TSS377	chr2L:3713359-3717773	23.7173	24.4666	23.1343	21.887	20.2716	19.3024	20.133	20.1225	18.4478	22.5518	21.5194	20.2688	OK	20.697	23.3013	0.170992	0.40101	0.42095	0.822208	no	OK	20.697	19.9574	-0.0524968	-0.121884	0.8049	0.973334	no	OK	23.3013	19.9574	-0.223489	-0.524612	0.29125	0.706778	no
XLOC_000285	Shaw	TSS378,TSS379	chr2L:3718184-3729145	8.44701	9.48244	7.82826	3.09696	5.88234	1.55075	1.79071	6.45822	3.08799	1.68436	1.576	2.46737	OK	2.20393	7.21367	1.71066	2.67338	5e-05	0.00129868	yes	OK	2.20393	3.92051	0.830963	1.23948	0.0173	0.130965	no	OK	7.21367	3.92051	-0.879693	-1.55255	0.00265	0.032582	yes
XLOC_000286	CG10019	TSS380,TSS381	chr2L:3730465-3754617	1.59819	1.41757	0.527708	0.410538	0.45916	0.573099	0.43791	0.669832	0.396669	0.681194	0.188192	0.430239	OK	0.424073	0.988501	1.22093	1.26819	0.0146	0.115889	no	OK	0.424073	0.535	0.335226	0.333573	0.50915	0.877651	no	OK	0.988501	0.535	-0.885702	-0.98226	0.05565	0.291895	no
XLOC_000287	CG43707	TSS382,TSS383,TSS384	chr2L:3757255-3769525	0.19459	0.643982	0.0472631	0.063029	0.233807	0.222025	0.0736107	0.309389	0	0.133464	0.0593285	0.0649436	NOTEST	0.0644341	0.237216	1.88031	0	1	1	no	NOTEST	0.0644341	0.209708	1.70249	0	1	1	no	NOTEST	0.237216	0.209708	-0.17782	0	1	1	no
XLOC_000288	CG43703	TSS385	chr2L:3757255-3769525	0	0	0	0	0	0	0	0	0	0	0	0	NOTEST	0	0	0	0	1	1	no	NOTEST	0	0	0	0	1	1	no	NOTEST	0	0	0	0	1	1	no
XLOC_000289	mir-1004	TSS386	chr2L:3757255-3769525	0	0	0	0	0	0	0	0	0	0	0	0	NOTEST	0	0	0	0	1	1	no	NOTEST	0	0	0	0	1	1	no	NOTEST	0	0	0	0	1	1	no
XLOC_000290	bowl	TSS387,TSS388,TSS389,TSS390	chr2L:3771699-3784121	9.03325	7.76183	4.93145	3.17014	5.63263	4.35006	3.54159	4.96138	2.83326	2.92987	2.6269	3.00677	OK	2.8492	6.22417	1.12732	1.86797	0.00065	0.0109764	yes	OK	2.8492	4.62142	0.697779	1.11942	0.02645	0.176929	no	OK	6.22417	4.62142	-0.429545	-0.767536	0.12055	0.464589	no
XLOC_000291	CG31960	TSS391	chr2L:3784946-3785622	0	0	0	0.0819007	0	0	0	0	0	0	0	0	NOTEST	0	0.0204752	inf	0	1	1	no	NOTEST	0	0	0	0	1	1	no	NOTEST	0.0204752	0	#NAME?	0	1	1	no
XLOC_000292	CG31958	TSS392	chr2L:3785737-3786343	0	0	0	0	0	0.098669	0	0	0	0	0	0	NOTEST	0	0	0	0	1	1	no	NOTEST	0	0.0246673	inf	0	1	1	no	NOTEST	0	0.0246673	inf	0	1	1	no
XLOC_000293	CG3921	TSS393,TSS394	chr2L:3787166-3802726	0.551633	0.373522	1.9718	0.285936	6.08729	6.7824	5.80121	7.39409	1.65121	1.68928	1.45431	2.472	OK	1.8167	0.795722	-1.19098	-1.80278	0.001	0.0153887	yes	OK	1.8167	6.51625	1.84272	3.80732	5e-05	0.00129868	yes	OK	0.795722	6.51625	3.0337	5.00071	5e-05	0.00129868	yes
XLOC_000294	Reph	TSS395,TSS396	chr2L:3803544-3810671	4.38929	4.57535	4.65772	2.56089	2.36219	1.90466	2.35634	4.17549	2.23251	1.12499	1.9271	2.23038	OK	1.87875	4.04581	1.10666	1.65458	0.0015	0.0210773	yes	OK	1.87875	2.69967	0.523015	0.749199	0.1294	0.482959	no	OK	4.04581	2.69967	-0.583644	-0.935515	0.0629	0.315139	no
XLOC_000295	CR44076	TSS397	chr2L:3815437-3815948	0	0	0	0.120489	0	0	0	0	0	0.710918	0.176375	0	NOTEST	0.221823	0.0301222	-2.88051	0	1	1	no	NOTEST	0.221823	0	#NAME?	0	1	1	no	NOTEST	0.0301222	0	#NAME?	0	1	1	no
XLOC_000296	CR44077	TSS398	chr2L:3817723-3818534	0	0	0	0	0	0.0669892	0	0	0	0	0	0	NOTEST	0	0	0	0	1	1	no	NOTEST	0	0.0167473	inf	0	1	1	no	NOTEST	0	0.0167473	inf	0	1	1	no
XLOC_000297	slp1	TSS399	chr2L:3825674-3827099	0	0	0.445749	0.133506	0.132837	0.102448	0.111379	0.25013	0.242781	0	0.122856	0.10992	NOTEST	0.118889	0.144814	0.284579	0	1	1	no	NOTEST	0.118889	0.149199	0.327614	0	1	1	no	NOTEST	0.144814	0.149199	0.0430353	0	1	1	no
XLOC_000298	slp2	TSS400	chr2L:3836839-3839185	0	0	0	0	0	0	0	0.0603267	0	0.0373353	0	0.0362965	NOTEST	0.0184079	0	#NAME?	0	1	1	no	NOTEST	0.0184079	0.0150817	-0.287531	0	1	1	no	NOTEST	0	0.0150817	inf	0	1	1	no
XLOC_000299	CR45451	TSS401	chr2L:3851950-3852604	0	0	0	0	0	0	0	0	0	0	0	0	NOTEST	0	0	0	0	1	1	no	NOTEST	0	0	0	0	1	1	no	NOTEST	0	0	0	0	1	1	no
XLOC_000300	CG3964	TSS402,TSS403	chr2L:3862667-3867507	1.01842	1.12865	0.909781	0.540919	1.18912	1.71638	1.62189	1.00618	0.749327	0.634323	0.465218	1.00417	OK	0.713258	0.899442	0.334606	0.340754	0.47365	0.854702	no	OK	0.713258	1.38339	0.955712	1.03033	0.0406	0.235289	no	OK	0.899442	1.38339	0.621106	0.696889	0.1433	0.508767	no
XLOC_000301	Cep97	TSS404,TSS405	chr2L:3867696-3872458	6.65477	4.56449	4.86577	4.70502	6.34989	4.00068	5.44694	6.39037	5.68468	4.5244	4.83081	4.69459	OK	4.93362	5.19751	0.0751731	0.114098	0.8174	0.975876	no	OK	4.93362	5.54697	0.169053	0.260016	0.59835	0.916889	no	OK	5.19751	5.54697	0.0938798	0.144023	0.7711	0.967536	no
XLOC_000302	CG43797	TSS406	chr2L:4000017-4000806	0	0	0	0	0	0	0	0.0418939	0.781949	0	0	0.158442	NOTEST	0.235098	0	#NAME?	0	1	1	no	NOTEST	0.235098	0.0104735	-4.48845	0	1	1	no	NOTEST	0	0.0104735	inf	0	1	1	no
XLOC_000303	CR45344	TSS407	chr2L:4001083-4001620	0	0	0	0	0	0	0.0936898	0.139677	0	0	0	0.0531107	NOTEST	0.0132777	0	#NAME?	0	1	1	no	NOTEST	0.0132777	0.0583416	2.13552	0	1	1	no	NOTEST	0	0.0583416	inf	0	1	1	no
XLOC_000304	CG34176	TSS408	chr2L:4004079-4004480	21.9199	13.2053	49.1715	17.0307	59.7014	61.5571	55.0476	76.8952	22.2546	33.1203	24.5818	35.6023	OK	28.8898	25.3319	-0.189605	-0.249971	0.5971	0.916157	no	OK	28.8898	63.3003	1.13166	1.72523	0.00055	0.00954679	yes	OK	25.3319	63.3003	1.32126	1.91422	0.00045	0.00814181	yes
XLOC_000305	CG15422	TSS409	chr2L:4004983-4005670	13.6656	6.60398	17.1077	13.1509	61.7755	55.8666	45.6585	53.8895	38.2787	27.0204	23.2454	37.7955	OK	31.585	12.6321	-1.32215	-1.9582	0.00035	0.00662569	yes	OK	31.585	54.2975	0.781646	1.50057	0.00335	0.0390738	yes	OK	12.6321	54.2975	2.1038	3.26743	5e-05	0.00129868	yes
XLOC_000306	CG15423	TSS410	chr2L:4006040-4006606	27.6501	72.7331	15.757	14.1624	106.576	166.527	40.0078	56.493	75.3373	55.1451	20.9829	62.582	OK	53.5118	32.5756	-0.716065	-1.22206	0.0153	0.119752	no	OK	53.5118	92.401	0.788051	1.56247	0.00195	0.0258761	yes	OK	32.5756	92.401	1.50412	2.66041	5e-05	0.00129868	yes
XLOC_000307	CG43773	TSS411	chr2L:4007689-4007984	15.1398	3.32307	9.40068	0.932299	9.84242	14.8603	3.38004	10.5818	13.6786	4.75494	2.247	11.6719	OK	8.0881	7.19896	-0.168011	-0.11936	0.8098	0.974805	no	OK	8.0881	9.66614	0.257139	0.194811	0.68525	0.94655	no	OK	7.19896	9.66614	0.425151	0.32546	0.4924	0.866894	no
XLOC_000308	CG43774	TSS412	chr2L:4008652-4009090	8.35628	32.9487	5.92864	3.04389	9.19294	13.0473	4.83385	10.0302	21.5001	10.3833	4.77971	16.1238	OK	13.1968	12.5694	-0.070269	-0.0741081	0.88145	0.98546	no	OK	13.1968	9.27605	-0.5086	-0.529275	0.29465	0.709794	no	OK	12.5694	9.27605	-0.438331	-0.438763	0.38395	0.792915	no
XLOC_000309	ed	TSS413	chr2L:4031376-4115749	15.4344	25.4966	21.2225	33.8001	20.4271	22.9749	26.4212	30.4502	27.7086	29.0343	32.889	26.3271	OK	28.9897	23.9884	-0.273206	-0.699899	0.1576	0.533087	no	OK	28.9897	25.0684	-0.209674	-0.549345	0.2673	0.680627	no	OK	23.9884	25.0684	0.0635325	0.161423	0.74155	0.961423	no
XLOC_000310	snoRNA:Me28S-C437	TSS414	chr2L:4031376-4115749	0	0	0	0	0	0	0	0	0	0	0	0	NOTEST	0	0	0	0	1	1	no	NOTEST	0	0	0	0	1	1	no	NOTEST	0	0	0	0	1	1	no
XLOC_000311	Sr-CIII	TSS415	chr2L:4120342-4121627	0.75573	0	0.279664	0.670289	0.222847	0.773382	0.349545	0.444626	0.243802	0.325235	0.154117	0.335298	NOTEST	0.264613	0.426421	0.688394	0	1	1	no	NOTEST	0.264613	0.4476	0.758326	0	1	1	no	NOTEST	0.426421	0.4476	0.0699322	0	1	1	no
XLOC_000312	Sr-CI	TSS416	chr2L:4121701-4124153	1.12229	1.00017	1.04162	2.93998	1.14891	1.29509	1.83918	1.73967	0.842492	0.560198	1.10107	2.41958	OK	1.23084	1.52602	0.310133	0.30018	0.5475	0.896064	no	OK	1.23084	1.50571	0.290806	0.282038	0.57765	0.90908	no	OK	1.52602	1.50571	-0.0193268	-0.0186118	0.9709	0.995846	no
XLOC_000313	CG2955	TSS417	chr2L:4149278-4151203	0	0	0	0	0	0	0.0199501	0.0298839	0	0.0231402	0	0.0112438	NOTEST	0.008596	0	#NAME?	0	1	1	no	NOTEST	0.008596	0.0124585	0.535394	0	1	1	no	NOTEST	0	0.0124585	inf	0	1	1	no
XLOC_000314	CR44057	TSS418	chr2L:4185400-4186114	0	0	0.630346	0.132602	0	0	0.443192	0	0	0	0.193948	0.125789	NOTEST	0.0799344	0.190737	1.2547	0	1	1	no	NOTEST	0.0799344	0.110798	0.471046	0	1	1	no	NOTEST	0.190737	0.110798	-0.783651	0	1	1	no
XLOC_000315	lectin-24Db	TSS419	chr2L:4188122-4189284	0	0.258813	0.723439	0.758595	2.07384	2.16131	0.773611	1.36817	1.22632	0.286298	1.51937	1.15084	OK	1.04571	0.435212	-1.26469	-0.752921	0.15775	0.533217	no	OK	1.04571	1.59423	0.608384	0.464437	0.35575	0.768675	no	OK	0.435212	1.59423	1.87307	1.20299	0.03825	0.22719	no
XLOC_000316	RpL40	TSS420	chr2L:4227698-4228561	5582.31	5016.92	6815.86	6918.7	4494.57	4716.39	4267.92	5466.89	6313.05	6756.76	7296.45	6113.59	OK	6619.96	6083.45	-0.121935	-0.336437	0.4998	0.871859	no	OK	6619.96	4736.44	-0.48302	-1.34308	0.00695	0.0677554	no	OK	6083.45	4736.44	-0.361085	-0.998363	0.04205	0.24125	no
XLOC_000317	CR44608	TSS421	chr2L:4228920-4229458	2.03649	3.93435	7.23716	9.84414	2.12487	4.56401	3.83108	4.10959	7.16528	4.94302	3.11307	3.5489	OK	4.69257	5.76303	0.296451	0.2472	0.62745	0.928214	no	OK	4.69257	3.65739	-0.359564	-0.305188	0.54385	0.89376	no	OK	5.76303	3.65739	-0.656015	-0.548261	0.2715	0.686133	no
XLOC_000318	CR44058	TSS422	chr2L:4241069-4242397	0.296665	0	0.196066	0.0411174	0	0.524705	0.274461	0.367309	1.09402	0.0398965	0.551259	0.290366	OK	0.493886	0.133462	-1.88775	-0.843426	0.2521	0.66567	no	OK	0.493886	0.291619	-0.760094	-0.402247	0.62055	0.925275	no	NOTEST	0.133462	0.291619	1.12765	0	1	1	no
XLOC_000319	CG15425	TSS423	chr2L:4257571-4258425	0	0	0	0.598794	0.178204	0	0.166605	0	0.677729	0.129666	0	0.0627737	NOTEST	0.217542	0.149699	-0.539234	0	1	1	no	NOTEST	0.217542	0.0862021	-1.3355	0	1	1	no	NOTEST	0.149699	0.0862021	-0.796266	0	1	1	no
XLOC_000320	tutl	TSS424,TSS425	chr2L:4283147-4323781	17.6467	14.8791	15.0907	6.30876	7.41119	3.988	3.40804	10.2863	5.32541	3.30804	4.18685	4.12577	OK	4.23652	13.4813	1.67001	3.51753	5e-05	0.00129868	yes	OK	4.23652	6.27339	0.566366	1.13146	0.02045	0.147441	no	OK	13.4813	6.27339	-1.10365	-2.41105	5e-05	0.00129868	yes
XLOC_000321	CG16857	TSS426	chr2L:4324553-4331830	2.18514	1.90885	1.72433	0.952543	0.585461	0.384655	0.452018	0.913419	0.501672	0.412617	0.702042	0.162037	OK	0.444592	1.69272	1.92879	1.59451	0.00825	0.0763218	no	OK	0.444592	0.583889	0.393211	0.29532	0.548	0.896411	no	OK	1.69272	0.583889	-1.53558	-1.51936	0.0055	0.0573921	no
XLOC_000322	Atet	TSS427,TSS428	chr2L:4333912-4345776	14.2365	11.4245	14.1132	11.7207	6.85321	5.0599	5.84874	10.4512	5.75458	5.04584	11.7208	6.53589	OK	7.26427	12.8737	0.825541	1.78243	0.0006	0.0102591	yes	OK	7.26427	7.05327	-0.0425253	-0.0855211	0.8635	0.983229	no	OK	12.8737	7.05327	-0.868067	-1.87414	0.0003	0.00585337	yes
XLOC_000323	mir-1005	TSS429	chr2L:4333912-4345776	0	0	0	0	0	0	0	0	0	0	0	0	NOTEST	0	0	0	0	1	1	no	NOTEST	0	0	0	0	1	1	no	NOTEST	0	0	0	0	1	1	no
XLOC_000324	CR44697	TSS430	chr2L:4347500-4347954	0	0	0	0	0	0	0	0	0	0	0	0	NOTEST	0	0	0	0	1	1	no	NOTEST	0	0	0	0	1	1	no	NOTEST	0	0	0	0	1	1	no
XLOC_000325	CR44698	TSS431	chr2L:4348317-4348678	0	0	0	0	0	0	0	0	0	0	0	0.50223	NOTEST	0.125558	0	#NAME?	0	1	1	no	NOTEST	0.125558	0	#NAME?	0	1	1	no	NOTEST	0	0	0	0	1	1	no
XLOC_000326	CR44699	TSS432	chr2L:4349171-4349685	2.33113	0	0	0	0	0	0	0.197748	0	0	0	0	NOTEST	0	0.582784	inf	0	1	1	no	NOTEST	0	0.0494369	inf	0	1	1	no	NOTEST	0.582784	0.0494369	-3.5593	0	1	1	no
XLOC_000327	CR44700	TSS433	chr2L:4350998-4351449	0	0	0	0	0	0	0	0	0	0	0	0	NOTEST	0	0	0	0	1	1	no	NOTEST	0	0	0	0	1	1	no	NOTEST	0	0	0	0	1	1	no
XLOC_000328	CG15429	TSS434	chr2L:4352974-4354034	0	0	0	0	0.360389	0	0.0450759	0	0	0	0.0397593	0	NOTEST	0.00993982	0	#NAME?	0	1	1	no	NOTEST	0.00993982	0.101366	3.35021	0	1	1	no	NOTEST	0	0.101366	inf	0	1	1	no
XLOC_000329	Traf4	TSS435,TSS436	chr2L:4361924-4380716	122.59	92.7177	95.2492	49.8232	73.9423	45.3289	30.9883	92.3379	52.5845	42.4005	61.8951	38.518	OK	48.8495	90.0951	0.883104	2.29459	5e-05	0.00129868	yes	OK	48.8495	60.6493	0.312148	0.790099	0.1081	0.435979	no	OK	90.0951	60.6493	-0.570957	-1.4628	0.003	0.0357787	yes
XLOC_000330	Tps1	TSS437	chr2L:4388326-4393876	0	0	0.262744	0.27526	0.161473	0.217946	0.127541	0.372716	0.222439	0.384131	0.169073	0.208338	NOTEST	0.245995	0.134501	-0.871013	0	1	1	no	NOTEST	0.245995	0.219919	-0.161657	0	1	1	no	NOTEST	0.134501	0.219919	0.709356	0	1	1	no
XLOC_000331	l(2)k05819	TSS438	chr2L:4394195-4400487	24.4715	20.7378	18.9938	21.5247	17.2139	20.0431	22.0338	17.6486	18.7985	18.3033	16.7395	18.2707	OK	18.028	21.432	0.249525	0.634398	0.20275	0.605142	no	OK	18.028	19.2348	0.0934824	0.236325	0.6392	0.931895	no	OK	21.432	19.2348	-0.156043	-0.397324	0.43325	0.830157	no
XLOC_000332	CG33003	TSS439	chr2L:4400952-4403142	0	0	0.0448023	0.0704278	0.186354	0.191636	0.156669	0.19714	0	0	0.190244	0.169521	NOTEST	0.0899414	0.0288075	-1.64254	0	1	1	no	NOTEST	0.0899414	0.18295	1.02439	0	1	1	no	NOTEST	0.0288075	0.18295	2.66693	0	1	1	no
XLOC_000333	Dim1	TSS440	chr2L:4403250-4403955	7.57492	9.58307	11.9999	11.563	17.5308	15.787	20.1034	13.7594	13.1056	17.91	15.0791	10.8453	OK	14.235	10.1802	-0.483674	-0.603385	0.2253	0.637671	no	OK	14.235	16.7952	0.238602	0.321734	0.5223	0.883466	no	OK	10.1802	16.7952	0.722276	0.933231	0.0652	0.322596	no
XLOC_000334	CG43055	TSS441	chr2L:4403991-4441282	39.8682	0	12.5352	0	0	12.3202	3.90456	12.2472	0	0	31.6208	0.0451217	OK	7.91647	13.1009	0.726734	0.47352	0.68035	0.945186	no	OK	7.91647	7.11799	-0.153386	-0.0924594	0.90635	0.988318	no	OK	13.1009	7.11799	-0.88012	-0.612464	0.47005	0.852529	no
XLOC_000335	CG34178	TSS442,TSS443	chr2L:4403991-4441282	0	0	0.242288	0	0	0	0	0	0	0	0	0.0510405	NOTEST	0.0127601	0.0605721	2.24701	0	1	1	no	NOTEST	0.0127601	0	#NAME?	0	1	1	no	NOTEST	0.0605721	0	#NAME?	0	1	1	no
XLOC_000336	CG43056	TSS444	chr2L:4403991-4441282	0	0	0	0	0	0	0	0	0	0	0	0	NOTEST	0	0	0	0	1	1	no	NOTEST	0	0	0	0	1	1	no	NOTEST	0	0	0	0	1	1	no
XLOC_000337	CG15432	TSS445,TSS446	chr2L:4442319-4444680	8.13738	15.4108	17.2353	13.3125	13.9945	18.282	22.196	16.9054	8.68168	16.717	15.4484	18.0832	OK	14.7326	13.524	-0.123488	-0.116573	0.813	0.975168	no	OK	14.7326	17.8445	0.276468	0.27647	0.58545	0.912495	no	OK	13.524	17.8445	0.399956	0.380907	0.4604	0.846101	no
XLOC_000338	Elp3	TSS447	chr2L:4444731-4448635	10.5298	7.7939	16.6993	12.1214	17.1245	18.0905	17.6375	13.6119	12.8732	29.0717	19.9573	17.05	OK	19.738	11.7861	-0.743893	-1.32958	0.00845	0.077845	no	OK	19.738	16.6161	-0.248396	-0.465518	0.35665	0.769458	no	OK	11.7861	16.6161	0.495497	0.862774	0.0856	0.380042	no
XLOC_000339	CG15434	TSS448	chr2L:4454625-4456807	0	0	0	1.12813	0	0.595052	0	0	1.02671	0.139161	0	0.267728	NOTEST	0.358401	0.282033	-0.345709	0	1	1	no	NOTEST	0.358401	0.148763	-1.26856	0	1	1	no	NOTEST	0.282033	0.148763	-0.922848	0	1	1	no
XLOC_000340	CG15435	TSS449,TSS450	chr2L:4459728-4463447	4.33719	0.732713	2.05439	1.2838	2.21821	1.98877	2.15943	1.55289	0.857562	1.04183	2.02005	1.04845	OK	1.24197	2.10202	0.759144	0.462232	0.37175	0.78303	no	OK	1.24197	1.97982	0.672737	0.435879	0.37395	0.784814	no	OK	2.10202	1.97982	-0.0864072	-0.0611306	0.903	0.988245	no
XLOC_000341	CG15436	TSS451	chr2L:4463610-4465075	0.851474	1.79402	1.54538	1.95752	2.01508	2.34841	2.95646	2.17096	2.25861	2.35496	2.68334	2.11194	OK	2.35221	1.5371	-0.61381	-0.56546	0.2431	0.657121	no	OK	2.35221	2.37273	0.0125295	0.0133019	0.9768	0.996785	no	OK	1.5371	2.37273	0.626339	0.576913	0.23505	0.649154	no
XLOC_000342	CG17840	TSS452	chr2L:4465173-4477022	3.30853	3.51768	4.2341	4.64956	3.77445	3.76441	4.60416	4.85635	4.87529	5.60426	5.09784	5.02511	OK	5.15063	3.92747	-0.391147	-0.52434	0.2841	0.700715	no	OK	5.15063	4.24984	-0.277338	-0.42033	0.39845	0.805085	no	OK	3.92747	4.24984	0.11381	0.150078	0.7575	0.964262	no
XLOC_000343	CR44609	TSS453	chr2L:4619586-4620918	0	0	0	0	0	0	0	0	0	0	0	0	NOTEST	0	0	0	0	1	1	no	NOTEST	0	0	0	0	1	1	no	NOTEST	0	0	0	0	1	1	no
XLOC_000344	BG642163	TSS454	chr2L:4641295-4642872	0	0	0	0	0	0	0	0	0	0	0	0	NOTEST	0	0	0	0	1	1	no	NOTEST	0	0	0	0	1	1	no	NOTEST	0	0	0	0	1	1	no
XLOC_000345	CG15635	TSS455	chr2L:4642971-4646562	0	0	0	0	0	0	0	0	0	0	0	0	NOTEST	0	0	0	0	1	1	no	NOTEST	0	0	0	0	1	1	no	NOTEST	0	0	0	0	1	1	no
XLOC_000346	CG43798	TSS456	chr2L:4647050-4647920	0	0	0	0	0	0	0	0	0	0	0	0	NOTEST	0	0	0	0	1	1	no	NOTEST	0	0	0	0	1	1	no	NOTEST	0	0	0	0	1	1	no
XLOC_000347	CG3355	TSS457	chr2L:4651402-4652892	0	0	0	0	0	0	0	0	0	0	0	0	NOTEST	0	0	0	0	1	1	no	NOTEST	0	0	0	0	1	1	no	NOTEST	0	0	0	0	1	1	no
XLOC_000348	CG11929	TSS458	chr2L:4682676-4687232	0	0	0	0	0	0	0	0	0	0	0	0	NOTEST	0	0	0	0	1	1	no	NOTEST	0	0	0	0	1	1	no	NOTEST	0	0	0	0	1	1	no
XLOC_000349	Elba3	TSS459	chr2L:4687510-4688956	0	0	0	0	0	0	0	0	0	0	0	0	NOTEST	0	0	0	0	1	1	no	NOTEST	0	0	0	0	1	1	no	NOTEST	0	0	0	0	1	1	no
XLOC_000350	CG34351	TSS460	chr2L:4694720-4722465	0	0	0.473515	0.220466	0.127255	0.0701064	0.195361	1.18841	0.68145	0.119781	0.0711008	0.220062	NOTEST	0.273098	0.173495	-0.654526	0	1	1	no	NOTEST	0.273098	0.395283	0.533466	0	1	1	no	NOTEST	0.173495	0.395283	1.18799	0	1	1	no
XLOC_000351	CG42523	TSS461	chr2L:4734591-4794044	0	0	0	0	0	0	0	0	0	0	0	0	NOTEST	0	0	0	0	1	1	no	NOTEST	0	0	0	0	1	1	no	NOTEST	0	0	0	0	1	1	no
XLOC_000352	CG3294	TSS462,TSS463	chr2L:4794548-4796581	2.32609	5.70532	5.97342	4.38667	3.55498	4.12963	5.10142	4.68813	6.84035	2.27902	5.52334	2.71598	OK	4.33967	4.59787	0.083382	0.106074	0.8333	0.978624	no	OK	4.33967	4.36854	0.00956689	0.0120223	0.9801	0.996794	no	OK	4.59787	4.36854	-0.0738151	-0.0936404	0.84925	0.981286	no
XLOC_000353	CG15629	TSS464	chr2L:4813008-4818245	0	1.49281	1.64653	4.51421	0.440329	0.407516	0.913814	0.704805	0.289733	0.57896	0.488725	1.21806	OK	0.64387	1.91339	1.57129	0.834589	0.30425	0.720726	no	OK	0.64387	0.616616	-0.0623968	-0.0287407	0.9613	0.994712	no	OK	1.91339	0.616616	-1.63369	-0.951361	0.23405	0.647642	no
XLOC_000354	CG15628	TSS465	chr2L:4821773-4828945	16.5653	12.049	6.01356	3.84887	7.16885	4.41428	3.21916	4.48972	4.88226	2.949	2.16126	2.7113	OK	3.17595	9.61918	1.59872	2.87084	5e-05	0.00129868	yes	OK	3.17595	4.823	0.602741	1.02746	0.03835	0.227407	no	OK	9.61918	4.823	-0.995982	-1.92686	5e-05	0.00129868	yes
XLOC_000355	CG12194	TSS466,TSS467	chr2L:4838346-4841465	16.8012	10.6777	16.2673	11.3528	16.6012	11.3508	12.6258	22.249	9.42834	5.32845	6.83745	9.79364	OK	7.84697	13.7748	0.811819	1.54882	0.00225	0.028828	yes	OK	7.84697	15.7067	1.00117	1.92845	0.0001	0.00237535	yes	OK	13.7748	15.7067	0.189354	0.39505	0.4246	0.824234	no
XLOC_000356	CG11927	TSS468	chr2L:4847765-4850419	10.2373	8.49036	9.69906	7.91214	6.32184	7.83402	8.74794	7.10379	5.42335	10.0993	7.60517	6.96174	OK	7.5224	9.0847	0.272247	0.35317	0.47685	0.856481	no	OK	7.5224	7.5019	-0.00393632	-0.00481138	0.99385	0.998571	no	OK	9.0847	7.5019	-0.276184	-0.361867	0.46745	0.851188	no
XLOC_000357	Mon1	TSS469	chr2L:4850640-4852640	9.26595	11.261	10.3395	10.3452	9.44031	9.05732	10.0199	8.28537	9.62855	11.0776	9.48041	9.51983	OK	9.92659	10.3029	0.0536807	0.0979658	0.8418	0.980621	no	OK	9.92659	9.20071	-0.109552	-0.196609	0.6884	0.947524	no	OK	10.3029	9.20071	-0.163233	-0.294187	0.5586	0.901235	no
XLOC_000358	pog	TSS470	chr2L:4852863-4876792	0.427187	1.1332	0.183666	0.657523	0.794501	1.20557	0.929235	1.293	1.33203	0.529987	0.653679	0.881286	OK	0.849246	0.600395	-0.500271	-0.527258	0.313	0.729499	no	OK	0.849246	1.05558	0.313777	0.361597	0.4811	0.858672	no	OK	0.600395	1.05558	0.814048	0.895238	0.09405	0.403174	no
XLOC_000359	CG3008	TSS471	chr2L:4883297-4885669	40.4385	29.6892	23.37	21.9382	20.6919	25.0228	17.545	20.8688	30.3065	38.0769	18.2355	38.3922	OK	31.2528	28.859	-0.114962	-0.275118	0.5778	0.90908	no	OK	31.2528	21.0321	-0.571389	-1.34212	0.0066	0.0654353	no	OK	28.859	21.0321	-0.456427	-1.0684	0.03015	0.193798	no
XLOC_000360	CG15625	TSS472	chr2L:4889994-4891277	0	0	0.0758434	0.0397613	0	0	0	0.0248256	0	0	0	0.037433	NOTEST	0.00935825	0.0289012	1.62682	0	1	1	no	NOTEST	0.00935825	0.00620639	-0.592484	0	1	1	no	NOTEST	0.0289012	0.00620639	-2.2193	0	1	1	no
XLOC_000361	CG3036	TSS473	chr2L:4892111-4906762	22.6694	22.8359	14.1973	5.76231	22.0899	21.0307	13.7745	20.6516	29.4806	25.9205	30.2972	22.8081	OK	27.1266	16.3662	-0.728985	-1.68715	0.00095	0.0147702	yes	OK	27.1266	19.3867	-0.48464	-1.16082	0.0212	0.151437	no	OK	16.3662	19.3867	0.244345	0.55207	0.2711	0.685425	no
XLOC_000362	Sgs1	TSS474	chr2L:4937408-4941423	0	0	0.0531528	0.12249	0	0.124551	0.102152	0.111362	0.129575	0.0537539	0.0574694	0.156884	NOTEST	0.0994207	0.0439106	-1.17898	0	1	1	no	NOTEST	0.0994207	0.0845163	-0.234317	0	1	1	no	NOTEST	0.0439106	0.0845163	0.944661	0	1	1	no
XLOC_000363	CG14044	TSS475	chr2L:4942741-4945361	1.70899	1.78984	0.417356	0.838642	0.580987	0.373394	0.699681	0.20492	0.530474	0.212115	0.322052	0.652049	OK	0.429172	1.18871	1.46977	0.494543	0.3861	0.794889	no	OK	0.429172	0.464745	0.114883	0.0333884	0.95245	0.993348	no	OK	1.18871	0.464745	-1.35488	-0.461761	0.4137	0.816785	no
XLOC_000364	betaggt-I	TSS476	chr2L:4945578-4949784	59.9904	56.7178	33.8791	43.6905	39.8528	41.1034	39.9692	33.5449	39.4056	40.7038	35.7027	42.7789	OK	39.6477	48.5695	0.292811	0.688486	0.16915	0.551747	no	OK	39.6477	38.6176	-0.0379812	-0.0886591	0.857	0.981712	no	OK	48.5695	38.6176	-0.330792	-0.771442	0.12275	0.468963	no
XLOC_000365	Marcal1	TSS477	chr2L:4955508-4958292	1.34901	1.83598	3.29298	2.19391	2.5765	2.80879	4.00383	2.57776	2.78219	2.75526	3.67558	2.38795	OK	2.90024	2.16797	-0.419828	-0.537008	0.2651	0.67798	no	OK	2.90024	2.99172	0.0448001	0.0607089	0.8982	0.987025	no	OK	2.16797	2.99172	0.464628	0.596274	0.2234	0.634993	no
XLOC_000366	CG34124	TSS478	chr2L:4958410-4965430	0	0.0990274	0.0796029	0.166743	0.192121	0.141126	0.208573	0.130298	0.222315	0.0603266	0.399655	0.21527	NOTEST	0.224392	0.0863433	-1.37786	0	1	1	no	NOTEST	0.224392	0.16803	-0.417303	0	1	1	no	NOTEST	0.0863433	0.16803	0.96056	0	1	1	no
XLOC_000367	CG34125	TSS479	chr2L:4965672-4967775	170.801	141.546	107.511	114.223	58.8836	66.0368	60.3601	88.7275	108.002	121.536	126.051	91.3717	OK	111.74	133.52	0.256909	0.261213	0.5972	0.916157	no	OK	111.74	68.502	-0.705929	-0.586328	0.23945	0.654361	no	OK	133.52	68.502	-0.962839	-0.824907	0.10615	0.43103	no
XLOC_000368	CG3756	TSS480	chr2L:4969003-4973921	9.66696	6.61646	12.8154	9.44087	14.8198	15.7915	19.5513	11.9737	14.9731	22.1225	16.2385	16.9792	OK	17.5783	9.63493	-0.867453	-1.00171	0.0538	0.285223	no	OK	17.5783	15.5341	-0.17836	-0.24529	0.6245	0.92719	no	OK	9.63493	15.5341	0.689093	0.780288	0.1215	0.466429	no
XLOC_000369	CG14043	TSS481	chr2L:4969003-4973921	8.15397	11.1834	9.50813	8.90032	11.4982	11.0851	10.4129	11.1067	10.2568	10.9136	9.34978	9.75881	OK	10.0697	9.43645	-0.0937106	-0.140896	0.775	0.96798	no	OK	10.0697	11.0257	0.130847	0.193914	0.6986	0.950382	no	OK	9.43645	11.0257	0.224557	0.336335	0.49365	0.867545	no
XLOC_000370	mRpL28	TSS482	chr2L:4973975-4977023	20.7228	22.2775	29.1977	28.1153	40.3822	42.0833	38.303	29.03	39.892	39.9377	27.9212	41.0629	OK	37.2034	25.0783	-0.568994	-0.767455	0.12495	0.473827	no	OK	37.2034	37.4496	0.00951588	0.0146483	0.97595	0.996746	no	OK	25.0783	37.4496	0.57851	0.772496	0.1212	0.466027	no
XLOC_000371	CG3792	TSS483	chr2L:4977311-4979379	36.2413	31.3434	16.436	22.8698	28.287	25.7932	23.852	19.021	26.4996	23.2595	18.691	25.6275	OK	23.5194	26.7226	0.184211	0.308335	0.54955	0.897244	no	OK	23.5194	24.2383	0.0434368	0.0733301	0.87875	0.98534	no	OK	26.7226	24.2383	-0.140774	-0.236976	0.62975	0.928854	no
XLOC_000372	CG34126	TSS484	chr2L:4981613-4992702	44.4862	54.3679	37.6698	44.1795	32.4794	42.9674	37.1704	42.4106	41.2394	42.6213	40.4986	39.2674	OK	40.9067	45.1758	0.143215	0.389548	0.4333	0.830157	no	OK	40.9067	38.7569	-0.0778817	-0.212124	0.66435	0.939838	no	OK	45.1758	38.7569	-0.221097	-0.599182	0.23485	0.648915	no
XLOC_000373	CG3887	TSS485,TSS486	chr2L:5010921-5012127	78.2018	89.5235	68.8544	78.0998	102.617	99.2335	98.2568	78.7236	81.8147	92.5975	64.9048	88.7249	OK	82.0105	78.6699	-0.0599965	-0.14739	0.76495	0.966589	no	OK	82.0105	94.7076	0.207673	0.514189	0.3008	0.716587	no	OK	78.6699	94.7076	0.267669	0.662001	0.1842	0.576968	no
XLOC_000374	Cg25C	TSS487	chr2L:5029608-5037279	0	0.062785	0.0294358	0.0426196	0.0507581	0.219204	0.271329	0.178279	0	0.0743724	0.113734	0.412554	NOTEST	0.150165	0.0337101	-2.15529	0	1	1	no	NOTEST	0.150165	0.179892	0.260586	0	1	1	no	NOTEST	0.0337101	0.179892	2.41588	0	1	1	no
XLOC_000375	CG14042	TSS488,TSS489	chr2L:5037708-5051062	7.88825	6.28937	6.59537	5.70064	14.9963	7.66692	9.29032	17.6971	5.25334	4.32807	6.94412	7.12446	OK	5.9125	6.61841	0.162716	0.0802706	0.87	0.98459	no	OK	5.9125	12.4127	1.06997	0.611088	0.2904	0.706216	no	OK	6.61841	12.4127	0.907256	0.509576	0.3389	0.755772	no
XLOC_000376	CG33995,CG44000	TSS490,TSS491,TSS492	chr2L:5037708-5051062	110.499	112.097	114.25	111.506	88.2015	82.196	90.631	129.297	98.4206	95.5349	112.796	101.21	OK	101.99	112.088	0.136203	0.345366	0.48795	0.863503	no	OK	101.99	97.5814	-0.0637526	-0.157789	0.7551	0.963735	no	OK	112.088	97.5814	-0.199956	-0.495222	0.32365	0.740455	no
XLOC_000377	CG14040	TSS493	chr2L:5051192-5054575	8.62946	4.5962	6.6342	5.2882	9.44636	6.56885	8.89601	8.35809	6.75796	3.93267	5.59383	6.40333	OK	5.67195	6.28702	0.148531	0.0516876	0.93705	0.992789	no	OK	5.67195	8.31733	0.552276	0.212879	0.79375	0.971105	no	OK	6.28702	8.31733	0.403745	0.160659	0.8468	0.981132	no
XLOC_000378	His3.3A	TSS494	chr2L:5055057-5058248	212.205	163.616	187.253	215.53	342.049	305.641	321.369	253.509	223.532	168.388	212.049	257.489	OK	215.364	194.651	-0.145892	-0.360196	0.4815	0.858797	no	OK	215.364	305.642	0.505063	1.27364	0.0115	0.0972996	no	OK	194.651	305.642	0.650955	1.65207	0.00105	0.0159693	yes
XLOC_000379	mir-2495,qtc	TSS495,TSS496,TSS497,TSS498,TSS499	chr2L:5060814-5070750	5.05946	6.4853	5.90676	4.5268	5.32992	3.45762	14.4885	5.33736	4.62741	2.07458	3.69576	5.12364	OK	3.88035	5.49458	0.501823	0.725233	0.1473	0.514355	no	OK	3.88035	7.15334	0.882431	1.3995	0.0146	0.115889	no	OK	5.49458	7.15334	0.380608	0.624013	0.24255	0.656974	no
XLOC_000380	RpL37A	TSS500	chr2L:5070886-5072055	3047.01	3021.89	3757.07	4102.67	2741.66	3072.8	2773.94	3055.53	3988.35	3966.97	3833.83	3950.4	OK	3934.89	3482.16	-0.17634	-0.49214	0.3209	0.737524	no	OK	3934.89	2910.98	-0.434817	-1.21974	0.01525	0.119524	no	OK	3482.16	2910.98	-0.258477	-0.723447	0.1442	0.509926	no
XLOC_000381	CG5828	TSS501	chr2L:5093975-5095910	4.28014	2.76727	4.40269	3.66247	3.27239	3.4703	3.33272	4.23448	3.11362	3.15227	3.2586	2.95159	OK	3.11902	3.77814	0.276584	0.365841	0.44375	0.836211	no	OK	3.11902	3.57747	0.197848	0.255239	0.6023	0.918174	no	OK	3.77814	3.57747	-0.0787354	-0.104351	0.83595	0.979177	no
XLOC_000382	CG4230	TSS502,TSS503	chr2L:5096226-5100288	20.4181	16.9083	18.1752	15.895	18.952	14.9279	15.4565	19.629	16.9391	15.7605	14.5655	17.45	OK	16.1788	17.8492	0.141755	0.25135	0.61085	0.921685	no	OK	16.1788	17.2413	0.0917689	0.158184	0.75585	0.964236	no	OK	17.8492	17.2413	-0.0499857	-0.0857937	0.86395	0.983411	no
XLOC_000383	Msp300,snmRNA:128,snmRNA:158,snmRNA:765	TSS504,TSS505,TSS506,TSS507,TSS508,TSS509,TSS510,TSS511	chr2L:5100876-5206993	47.89	48.2763	60.9609	59.6619	46.8173	34.8372	36.1899	43.5436	31.399	48.0407	54.9482	54.5672	OK	47.2388	54.1973	0.19825	0.424069	0.3058	0.722009	no	OK	47.2388	40.347	-0.22751	-0.0811023	0.39235	0.800159	no	OK	54.1973	40.347	-0.42576	-0.151824	0.1586	0.534764	no
XLOC_000384	snoRNA:Psi28S-2263	TSS512	chr2L:5100876-5206993	0	0	0	0	0	0	0	0	0	0	0	0	NOTEST	0	0	0	0	1	1	no	NOTEST	0	0	0	0	1	1	no	NOTEST	0	0	0	0	1	1	no
XLOC_000385	snoRNA:Psi18S-525k	TSS513	chr2L:5100876-5206993	0	0	6.34037	0	0	0	2.84462	2.1554	0	0	11.894	1.85164	OK	3.4364	1.58509	-1.11633	-0.0890124	0.6361	0.931166	no	OK	3.4364	1.25001	-1.45896	-0.102172	0.6028	0.91855	no	NOTEST	1.58509	1.25001	-0.342631	0	1	1	no
XLOC_000386	Cyp28d2	TSS514	chr2L:5207266-5209345	5.72781	9.34725	7.50755	6.86408	3.62208	3.2496	2.37417	3.83446	6.16986	6.02422	6.41131	3.55599	OK	5.54034	7.36167	0.410058	0.622271	0.1899	0.586039	no	OK	5.54034	3.27007	-0.760652	-0.996902	0.046	0.256608	no	OK	7.36167	3.27007	-1.17071	-1.58829	0.00285	0.0345074	yes
XLOC_000387	Cyp28d1	TSS515	chr2L:5210459-5215081	27.1354	25.2771	37.7359	17.7912	23.7269	11.7257	8.5568	26.2434	34.5651	14.8429	24.0903	17.0208	OK	22.6298	26.9849	0.253928	0.543968	0.2744	0.689323	no	OK	22.6298	17.5632	-0.365668	-0.735376	0.1326	0.489099	no	OK	26.9849	17.5632	-0.619596	-1.27423	0.0106	0.0915245	no
XLOC_000388	TpnC25D	TSS516,TSS517,TSS518	chr2L:5216700-5271384	0	0	0	0.174296	0	0	0.145549	0	0.887864	0.255701	0.0639555	0.121269	NOTEST	0.332197	0.043574	-2.9305	0	1	1	no	NOTEST	0.332197	0.0363873	-3.19054	0	1	1	no	NOTEST	0.043574	0.0363873	-0.260034	0	1	1	no
XLOC_000389	CR44744	TSS519	chr2L:5216700-5271384	2.39588	0.934585	0.378647	0.758352	0.076256	0.146078	0.331318	0.800408	0.275872	0.444322	0.461538	0.736716	OK	0.479612	1.11687	1.21951	0.252349	0.40725	0.812075	no	OK	0.479612	0.338515	-0.502649	-0.0760625	0.722	0.957038	no	OK	1.11687	0.338515	-1.72216	-0.297997	0.2676	0.680846	no
XLOC_000390	Cyp4ac1	TSS520	chr2L:5216700-5271384	1.4134	2.80583	3.55726	5.66257	0.631273	1.20284	1.09908	1.36581	1.42731	0.922801	1.73414	0.883266	OK	1.24188	3.35976	1.43583	0.624847	0.34115	0.757661	no	OK	1.24188	1.07475	-0.208526	-0.0727658	0.91905	0.989802	no	OK	3.35976	1.07475	-1.64436	-0.684629	0.2718	0.686356	no
XLOC_000391	Cyp4ac2,Cyp4ac3	TSS521,TSS522	chr2L:5216700-5271384	0	2.77536	1.58038	1.01562	0.492571	0.92081	0.627835	0.727739	0.283199	0.765227	0.913175	1.06113	OK	0.755684	1.34284	0.829431	0.268102	0.54755	0.896064	no	OK	0.755684	0.692239	-0.126513	-0.0368122	0.8973	0.987025	no	OK	1.34284	0.692239	-0.955944	-0.312396	0.49235	0.866859	no
XLOC_000392	Bub1	TSS523,TSS524	chr2L:5278864-5283283	14.4282	13.8019	13.4529	15.487	17.8993	18.604	16.5623	15.6408	16.1753	16.1342	14.4383	16.6932	OK	15.8602	14.2925	-0.150157	-0.364035	0.4633	0.848272	no	OK	15.8602	17.1766	0.115029	0.282412	0.56705	0.904556	no	OK	14.2925	17.1766	0.265186	0.647715	0.19615	0.595187	no
XLOC_000393	CR44742	TSS525	chr2L:5287446-5288667	8.27266	0	0	0.238931	0.487337	0	0.598811	0.520556	0	0.234919	0	0.0566028	OK	0.0728805	2.1279	4.86775	1.54608	0.3841	0.79302	no	NOTEST	0.0728805	0.401676	2.46243	0	1	1	no	OK	2.1279	0.401676	-2.40533	-1.22149	0.29365	0.709056	no
XLOC_000394	vri	TSS526,TSS527,TSS528	chr2L:5288943-5311223	169.787	170.649	178.319	125.751	81.8939	100.529	65.3631	109.39	107.192	170.098	174.928	138.874	OK	147.773	161.126	0.124811	0.346909	0.4865	0.862323	no	OK	147.773	89.294	-0.726747	-2.00994	0.0002	0.00422792	yes	OK	161.126	89.294	-0.851559	-2.35531	5e-05	0.00129868	yes
XLOC_000395	CR44985	TSS529	chr2L:5315289-5326832	2.93553	2.51932	6.56649	3.0937	2.84815	1.32401	5.17485	5.50108	0	2.40854	1.11408	1.49932	OK	1.25548	3.77876	1.58967	0.174789	0.30225	0.718605	no	OK	1.25548	3.71202	1.56396	0.169251	0.32895	0.745667	no	OK	3.77876	3.71202	-0.0257071	-0.00314401	0.98225	0.997196	no
XLOC_000396	cype	TSS530	chr2L:5327226-5327969	432.618	446.322	472.667	529.795	429.488	486.778	416.114	321.085	473.128	472.579	401.448	399.069	OK	436.556	470.351	0.10757	0.277231	0.58205	0.911088	no	OK	436.556	413.366	-0.0787456	-0.201685	0.68735	0.947372	no	OK	470.351	413.366	-0.186316	-0.479621	0.33865	0.755332	no
XLOC_000397	TotM	TSS531	chr2L:5329856-5330464	0	0	0	0.361461	0.491648	0.505423	0.603937	0.0749945	0	0	0.35274	0.570102	NOTEST	0.23071	0.0903654	-1.35224	0	1	1	no	NOTEST	0.23071	0.419001	0.860869	0	1	1	no	NOTEST	0.0903654	0.419001	2.21311	0	1	1	no
XLOC_000398	nompC	TSS532	chr2L:5346236-5365760	0.119076	0	0.0882778	0.0282436	0	0.00713875	0.05877	0	0	0.0477152	0.0104023	0.0131999	NOTEST	0.0178293	0.0588993	1.724	0	1	1	no	NOTEST	0.0178293	0.0164772	-0.113783	0	1	1	no	NOTEST	0.0588993	0.0164772	-1.83778	0	1	1	no
XLOC_000399	CR44745	TSS533	chr2L:5387550-5388632	0	0	0	0	0	0	0	0	0	0	0	0	NOTEST	0	0	0	0	1	1	no	NOTEST	0	0	0	0	1	1	no	NOTEST	0	0	0	0	1	1	no
XLOC_000400	H15	TSS534,TSS535	chr2L:5404279-5416593	0	0	0	0	0	0	0	0	0	0	0	0	NOTEST	0	0	0	0	1	1	no	NOTEST	0	0	0	0	1	1	no	NOTEST	0	0	0	0	1	1	no
XLOC_000401	CR43713	TSS536	chr2L:5431841-5432604	0	0	0	0	0	0	0	0	0	0	0	0	NOTEST	0	0	0	0	1	1	no	NOTEST	0	0	0	0	1	1	no	NOTEST	0	0	0	0	1	1	no
XLOC_000402	CR43714	TSS537	chr2L:5432821-5433522	0	0	0	0	0	0	0	0	0	0	0	0	NOTEST	0	0	0	0	1	1	no	NOTEST	0	0	0	0	1	1	no	NOTEST	0	0	0	0	1	1	no
XLOC_000403	mid	TSS538	chr2L:5461638-5467610	0	0	0.0583875	0.0611694	0.141004	0.0435002	0.0533731	0.146595	0.124109	0.0825115	0.125635	0.110278	NOTEST	0.110633	0.0298892	-1.88809	0	1	1	no	NOTEST	0.110633	0.0961181	-0.202907	0	1	1	no	NOTEST	0.0298892	0.0961181	1.68518	0	1	1	no
XLOC_000404	CR45287	TSS539	chr2L:5486904-5487191	0	0	0	0	0	0	0	0	0	0	0	0	NOTEST	0	0	0	0	1	1	no	NOTEST	0	0	0	0	1	1	no	NOTEST	0	0	0	0	1	1	no
XLOC_000405	CG14020	TSS540	chr2L:5517736-5519896	2.31437	1.23096	0.61193	1.64416	0.852833	0.986578	0.669172	1.05158	1.16686	0.77808	1.41642	0.98161	OK	1.08574	1.45035	0.417725	0.19625	0.7131	0.955236	no	OK	1.08574	0.890041	-0.286737	-0.136783	0.8215	0.977029	no	OK	1.45035	0.890041	-0.704463	-0.315864	0.5849	0.91215	no
XLOC_000406	cl	TSS541,TSS542	chr2L:5520134-5523898	106.621	124.184	95.8719	108.229	110.731	102.269	104.327	78.7467	114.388	91.8396	91.4858	108.972	OK	101.671	108.727	0.0967922	0.189394	0.7074	0.953628	no	OK	101.671	99.0183	-0.0381455	-0.0739353	0.88355	0.985491	no	OK	108.727	99.0183	-0.134938	-0.258474	0.60445	0.919493	no
XLOC_000407	CG6907	TSS543,TSS544	chr2L:5524138-5536758	10.6884	18.7627	18.858	17.5187	19.7081	21.6816	23.993	18.1582	17.8992	20.2978	19.7048	18.3034	OK	19.0513	16.457	-0.211191	-0.26701	0.59335	0.915353	no	OK	19.0513	20.8852	0.132594	0.175265	0.72365	0.957562	no	OK	16.457	20.8852	0.343785	0.43379	0.3939	0.801538	no
XLOC_000408	Cap-D3	TSS545	chr2L:5524138-5536758	6.74483	5.36294	7.52765	7.78498	6.07605	5.08117	6.74245	6.38614	4.91071	4.4927	6.28844	4.57909	OK	5.06774	6.8551	0.435836	0.523597	0.30055	0.716349	no	OK	5.06774	6.07145	0.260701	0.299874	0.5534	0.898773	no	OK	6.8551	6.07145	-0.175136	-0.220491	0.65895	0.937711	no
XLOC_000409	CG31648	TSS546	chr2L:5524138-5536758	0.827666	4.1102	7.14703	4.9796	7.79785	5.89559	7.78626	5.4998	9.8278	6.01425	5.1747	6.15167	OK	6.7921	4.26612	-0.670933	-0.350045	0.4921	0.866739	no	OK	6.7921	6.74487	-0.0100669	-0.00588355	0.99035	0.998126	no	OK	4.26612	6.74487	0.660866	0.339701	0.50495	0.87542	no
XLOC_000410	CG31915	TSS547	chr2L:5524138-5536758	3.26209	3.69966	2.63152	4.3533	8.36221	6.76369	10.0304	6.15464	6.86018	3.752	5.15974	6.04301	OK	5.45373	3.48664	-0.645406	-0.524466	0.2941	0.709364	no	OK	5.45373	7.82774	0.521351	0.518014	0.3097	0.725531	no	OK	3.48664	7.82774	1.16676	0.982499	0.05935	0.304658	no
XLOC_000411	Lam	TSS548,TSS549,TSS550	chr2L:5542479-5546642	31.9969	30.5704	45.4404	40.9187	75.5171	74.5984	81.1145	56.015	47.025	53.3432	56.6524	53.3211	OK	52.5854	37.2316	-0.498136	-1.30217	0.0092	0.0827306	no	OK	52.5854	71.8112	0.449547	1.20501	0.0161	0.124549	no	OK	37.2316	71.8112	0.947682	2.4982	5e-05	0.00129868	yes
XLOC_000412	Oscillin	TSS551,TSS552	chr2L:5547085-5549614	16.8721	12.3517	17.8543	12.218	12.0702	10.6557	9.23008	16.7818	8.01594	7.89563	11.7574	10.0601	OK	9.43226	14.824	0.652261	1.05384	0.0354	0.215586	no	OK	9.43226	12.1844	0.369363	0.579517	0.2473	0.662116	no	OK	14.824	12.1844	-0.282898	-0.474168	0.3507	0.764916	no
XLOC_000413	CG18269	TSS553	chr2L:5551837-5552756	0	0	0.106096	0	0	0	0.0928885	0.104178	0	0	0.327269	0.0786909	NOTEST	0.10149	0.026524	-1.93597	0	1	1	no	NOTEST	0.10149	0.0492665	-1.04266	0	1	1	no	NOTEST	0.026524	0.0492665	0.893309	0	1	1	no
XLOC_000414	CG14017,GluRIIA	TSS554,TSS555	chr2L:5553896-5558994	0	0.250316	0	0.0545813	0.216026	0.0277691	0.0227602	0.0767532	0	0.171335	0.506088	0.115664	NOTEST	0.198272	0.0762243	-1.37916	0	1	1	no	NOTEST	0.198272	0.0858271	-1.20797	0	1	1	no	NOTEST	0.0762243	0.0858271	0.171182	0	1	1	no
XLOC_000415	GluRIIB	TSS556	chr2L:5559341-5563502	0.10882	0	0	0	0	0.12324	0.0126214	0.104032	0	0.0877213	0.10039	0.0782018	NOTEST	0.0665782	0.027205	-1.29118	0	1	1	no	NOTEST	0.0665782	0.0599734	-0.150727	0	1	1	no	NOTEST	0.027205	0.0599734	1.14045	0	1	1	no
XLOC_000416	snRNA:U4:25F	TSS557	chr2L:5564810-5565766	0	0	0	0	0	0	0	0	0	0	0	0	NOTEST	0	0	0	0	1	1	no	NOTEST	0	0	0	0	1	1	no	NOTEST	0	0	0	0	1	1	no
XLOC_000417	CG18266	TSS558	chr2L:5596832-5598636	0	0	0	0.0256783	0	0	0	0.0481235	0	0	0	0	NOTEST	0	0.00641956	inf	0	1	1	no	NOTEST	0	0.0120309	inf	0	1	1	no	NOTEST	0.00641956	0.0120309	0.906196	0	1	1	no
XLOC_000418	CR44795	TSS559	chr2L:5601722-5617946	0	0	0	0	0	0	0	0	0	0	0	0	NOTEST	0	0	0	0	1	1	no	NOTEST	0	0	0	0	1	1	no	NOTEST	0	0	0	0	1	1	no
XLOC_000419	mir-959,mir-960,mir-961,mir-962	TSS560,TSS561,TSS562,TSS563	chr2L:5626290-5658560	0	0	0	0	0	0	0	0	0	0	0	0	NOTEST	0	0	0	0	1	1	no	NOTEST	0	0	0	0	1	1	no	NOTEST	0	0	0	0	1	1	no
XLOC_000420	mir-963,mir-964	TSS564,TSS565	chr2L:5626290-5658560	0	0	0	0	0	0	0	0	0	0	0	0	NOTEST	0	0	0	0	1	1	no	NOTEST	0	0	0	0	1	1	no	NOTEST	0	0	0	0	1	1	no
XLOC_000421	Hsp60C	TSS566	chr2L:5662848-5670838	0	0	0	0	0	0	0	0	0	0	0	0	NOTEST	0	0	0	0	1	1	no	NOTEST	0	0	0	0	1	1	no	NOTEST	0	0	0	0	1	1	no
XLOC_000422	CG12511	TSS567	chr2L:5678581-5679499	0	0	0	0	0	0	0	0	0	0	0	0	NOTEST	0	0	0	0	1	1	no	NOTEST	0	0	0	0	1	1	no	NOTEST	0	0	0	0	1	1	no
XLOC_000423	CR44819	TSS568	chr2L:5690528-5691770	0	0	0	0	0	0	0	0	0	0	0	0	NOTEST	0	0	0	0	1	1	no	NOTEST	0	0	0	0	1	1	no	NOTEST	0	0	0	0	1	1	no
XLOC_000424	CG7236	TSS569,TSS570,TSS571,TSS572	chr2L:5706373-5713791	0.230142	0	0.0913933	0.240623	0	0.130645	0.111512	0.0997223	0	0.0517593	0	0.194339	NOTEST	0.0615247	0.14054	1.19174	0	1	1	no	NOTEST	0.0615247	0.0854696	0.474247	0	1	1	no	NOTEST	0.14054	0.0854696	-0.717493	0	1	1	no
XLOC_000425	CR44818	TSS573	chr2L:5715348-5716680	0	0	0	0	0	0	0	0.0447352	0	0	0.105351	0	NOTEST	0.0263378	0	#NAME?	0	1	1	no	NOTEST	0.0263378	0.0111838	-1.23573	0	1	1	no	NOTEST	0	0.0111838	inf	0	1	1	no
XLOC_000426	CG34011	TSS574	chr2L:5716700-5718067	0	0	0	0	0	0	0	0	0	0	0	0	NOTEST	0	0	0	0	1	1	no	NOTEST	0	0	0	0	1	1	no	NOTEST	0	0	0	0	1	1	no
XLOC_000427	sip1	TSS575	chr2L:5721050-5723944	4.49168	2.58193	4.40849	4.64663	4.99392	5.45397	5.80725	4.79177	3.43415	5.40619	5.48477	4.05264	OK	4.59444	4.03218	-0.188328	-0.294693	0.56125	0.902628	no	OK	4.59444	5.26173	0.195649	0.318304	0.52385	0.884467	no	OK	4.03218	5.26173	0.383977	0.614939	0.2164	0.625722	no
XLOC_000428	CG11030	TSS576	chr2L:5724655-5762420	29.4711	31.2236	31.5862	35.2139	50.8744	50.7224	46.6373	39.9443	49.4664	44.7927	37.5976	45.7612	OK	44.4045	31.8737	-0.478339	-1.14716	0.02235	0.157258	no	OK	44.4045	47.0446	0.0833238	0.205858	0.6753	0.943275	no	OK	31.8737	47.0446	0.561663	1.3611	0.00705	0.0683578	no
XLOC_000429	CG11029	TSS577	chr2L:5724655-5762420	0.461968	0.209608	0.41628	0.307983	0.169889	0.366837	0.385348	0.384781	0.447981	0.695444	0.623771	0.349943	OK	0.529285	0.34896	-0.600984	-0.155134	0.71865	0.956473	no	OK	0.529285	0.326714	-0.696018	-0.162512	0.66495	0.940173	no	NOTEST	0.34896	0.326714	-0.0950338	0	1	1	no
XLOC_000430	CR31912	TSS578	chr2L:5767001-5800253	12.1397	13.0759	7.64195	9.76473	10.6311	15.1665	13.1093	11.5734	11.4047	11.8968	11.6174	10.3479	OK	11.3167	10.6556	-0.0868427	-0.0925322	0.8495	0.981286	no	OK	11.3167	12.6201	0.157267	0.166719	0.73635	0.960305	no	OK	10.6556	12.6201	0.244109	0.248267	0.61305	0.922377	no
XLOC_000431	CG31913	TSS579	chr2L:5767001-5800253	0	0.370023	0	0.0600897	0.160651	0.309722	0.200607	0	0.174876	0.116982	0	0.226733	NOTEST	0.129648	0.107528	-0.269884	0	1	1	no	NOTEST	0.129648	0.167745	0.37167	0	1	1	no	NOTEST	0.107528	0.167745	0.641554	0	1	1	no
XLOC_000432	CG7239	TSS580	chr2L:5802219-5804030	15.85	11.0475	13.5871	13.0201	16.3969	17.033	15.6168	14.7924	18.0147	16.3244	17.187	15.5861	OK	16.778	13.3762	-0.32691	-0.650249	0.18275	0.57444	no	OK	16.778	15.9598	-0.0721328	-0.147285	0.7689	0.967267	no	OK	13.3762	15.9598	0.254777	0.503572	0.3033	0.719668	no
XLOC_000433	CG11034	TSS581	chr2L:5805394-5809063	2.67334	2.48841	5.71395	1.8957	3.24584	2.40962	1.98769	4.00172	2.20644	2.83028	5.46229	3.2346	OK	3.4334	3.19285	-0.104794	-0.143519	0.77265	0.967536	no	OK	3.4334	2.91122	-0.238017	-0.32238	0.52075	0.882486	no	OK	3.19285	2.91122	-0.133224	-0.180759	0.7219	0.957038	no
XLOC_000434	CR44575	TSS582	chr2L:5809701-5810216	0	0	0	0	0	0	0	0	0	0	0	0	NOTEST	0	0	0	0	1	1	no	NOTEST	0	0	0	0	1	1	no	NOTEST	0	0	0	0	1	1	no
XLOC_000435	CR44576	TSS583	chr2L:5810351-5810835	0	0	0	0	0	0	0	0	0	0	0	0	NOTEST	0	0	0	0	1	1	no	NOTEST	0	0	0	0	1	1	no	NOTEST	0	0	0	0	1	1	no
XLOC_000436	CG43307	TSS584	chr2L:5811573-5811925	0	0	0	0	0	0	0	0	0	0	0	0	NOTEST	0	0	0	0	1	1	no	NOTEST	0	0	0	0	1	1	no	NOTEST	0	0	0	0	1	1	no
XLOC_000437	TrissinR	TSS585,TSS586	chr2L:5824003-5856767	3.76807	2.45928	1.77162	1.5447	2.1857	1.29747	3.68598	2.52024	2.10644	1.03093	1.45503	2.77385	OK	1.84156	2.38592	0.373613	0.470133	0.35375	0.767699	no	OK	1.84156	2.42235	0.395476	0.503474	0.31915	0.735984	no	OK	2.38592	2.42235	0.0218628	0.0294327	0.95415	0.993511	no
XLOC_000438	CG44574	TSS587	chr2L:5883740-5884345	0	0	0	0.254032	0	0.133453	0	0.0790426	0	0.375132	0.092924	0	NOTEST	0.117014	0.0635079	-0.881672	0	1	1	no	NOTEST	0.117014	0.053124	-1.13924	0	1	1	no	NOTEST	0.0635079	0.053124	-0.257572	0	1	1	no
XLOC_000439	CG43185	TSS588	chr2L:5884887-5885491	5.08481	3.18007	3.04227	0.834945	1.52246	0.146682	0.232575	2.25055	0.607869	0.54913	1.01719	0.316484	OK	0.622669	3.03552	2.28541	1.32121	0.01815	0.135077	no	OK	0.622669	1.03807	0.737363	0.37295	0.4367	0.831909	no	OK	3.03552	1.03807	-1.54805	-0.899151	0.0675	0.328469	no
XLOC_000440	CG9029	TSS589	chr2L:5886001-5886609	0	3.88201	2.41596	1.98723	1.79674	1.71428	1.01438	0.788007	0.321412	1.30057	2.66835	0.993119	OK	1.32086	2.0713	0.649055	0.370151	0.5633	0.902994	no	OK	1.32086	1.32835	0.00815343	0.00454045	0.9887	0.99801	no	OK	2.0713	1.32835	-0.640902	-0.46556	0.48585	0.861865	no
XLOC_000441	CR44578	TSS590	chr2L:5888148-5888484	0	0	2.27357	0.239991	0	0.521649	0	1.0416	0	0	0.174267	0	NOTEST	0.0435667	0.628389	3.85036	0	1	1	no	NOTEST	0.0435667	0.390813	3.16518	0	1	1	no	NOTEST	0.628389	0.390813	-0.685181	0	1	1	no
XLOC_000442	bchs	TSS591	chr2L:5907168-5922776	3.94033	4.36726	4.36032	3.47567	2.94797	3.10905	2.93931	5.32272	2.42526	1.4111	3.03095	2.35112	OK	2.30461	4.0359	0.808369	1.76031	0.00035	0.00662569	yes	OK	2.30461	3.57976	0.635344	1.35577	0.00665	0.0657262	no	OK	4.0359	3.57976	-0.173025	-0.395405	0.4277	0.826161	no
XLOC_000443	dsf	TSS592	chr2L:5925204-5939261	0	0	0.0698946	0	0	0	0	0	0.0852068	0	0	0	NOTEST	0.0213017	0.0174737	-0.285787	0	1	1	no	NOTEST	0.0213017	0	#NAME?	0	1	1	no	NOTEST	0.0174737	0	#NAME?	0	1	1	no
XLOC_000444	CR45288	TSS593	chr2L:5940032-5940250	0	0	0	0	0	0	0	0	0	0	0	0	NOTEST	0	0	0	0	1	1	no	NOTEST	0	0	0	0	1	1	no	NOTEST	0	0	0	0	1	1	no
XLOC_000445	CR45289	TSS594	chr2L:5941994-5942584	0	0	0	0	0	0	0	0	0	0	0	0	NOTEST	0	0	0	0	1	1	no	NOTEST	0	0	0	0	1	1	no	NOTEST	0	0	0	0	1	1	no
XLOC_000446	Gpdh	TSS595,TSS596	chr2L:5943642-5948968	42.6685	39.0908	50.3922	46.3892	38.5205	33.5723	36.6315	45.6309	34.6906	36.3765	49.565	43.5387	OK	41.0427	44.6352	0.121055	0.279058	0.58255	0.911415	no	OK	41.0427	38.5888	-0.0889433	-0.201958	0.68385	0.945941	no	OK	44.6352	38.5888	-0.209999	-0.479823	0.3429	0.758364	no
XLOC_000447	CG9044	TSS597	chr2L:5949449-5955235	11.3835	14.6434	18.3589	15.0241	13.2067	13.7236	13.7395	15.0883	14.9046	13.7866	17.9105	13.3544	OK	14.989	14.8525	-0.0132038	-0.0320815	0.9491	0.993315	no	OK	14.989	13.9395	-0.104725	-0.254984	0.61255	0.922377	no	OK	14.8525	13.9395	-0.091521	-0.222125	0.6528	0.935355	no
XLOC_000448	Vm26Ab	TSS598	chr2L:5957003-5957639	0	0.74978	0	0.272658	0.359031	0.283543	0.151761	0.623044	0.661496	0.266784	0.33328	0.988203	OK	0.562441	0.255609	-1.13776	-0.515399	0.4498	0.839854	no	OK	0.562441	0.354345	-0.666548	-0.335305	0.50465	0.875372	no	NOTEST	0.255609	0.354345	0.471212	0	1	1	no
XLOC_000449	Ucp4C	TSS599	chr2L:5968565-5969761	2.49962	1.08446	1.04957	1.8342	2.05912	2.04772	1.42835	2.18854	2.84646	1.06778	4.25886	3.12767	OK	2.82519	1.61696	-0.805065	-0.734263	0.1496	0.518402	no	OK	2.82519	1.93093	-0.54905	-0.529115	0.28115	0.697707	no	OK	1.61696	1.93093	0.256016	0.230535	0.6304	0.928882	no
XLOC_000450	Ucp4B	TSS600	chr2L:5969858-5971025	0	0	0	0	0	0.0462154	0.0379726	0	0	0	0	0	NOTEST	0	0	0	0	1	1	no	NOTEST	0	0.021047	inf	0	1	1	no	NOTEST	0	0.021047	inf	0	1	1	no
XLOC_000451	eIF-4a	TSS601,TSS602,TSS603	chr2L:5981763-5985909	2145.75	2235.27	2572.85	2560.63	1751.13	1959.42	1861.7	2302.56	2109.1	2611.49	2679.76	2535.46	OK	2483.95	2378.62	-0.0625096	-0.171781	0.7377	0.960305	no	OK	2483.95	1968.7	-0.335394	-0.917571	0.0688	0.331805	no	OK	2378.62	1968.7	-0.272884	-0.746764	0.13755	0.498429	no
XLOC_000452	ifc	TSS604,TSS605	chr2L:5986347-5988854	601.482	646.089	283.036	377.56	269.339	309.936	262.217	274.151	334.701	287.711	283.81	247.763	OK	288.496	477.042	0.725562	1.98821	5e-05	0.00129868	yes	OK	288.496	278.911	-0.04875	-0.136577	0.7817	0.969423	no	OK	477.042	278.911	-0.774312	-2.12055	5e-05	0.00129868	yes
XLOC_000453	Tsp26A	TSS606	chr2L:6000227-6006827	8.91049	8.38974	7.15668	8.03755	4.24073	3.14888	4.50025	6.66417	7.23189	8.6686	6.70899	6.41304	OK	7.25563	8.12361	0.163021	0.286989	0.5666	0.904556	no	OK	7.25563	4.63851	-0.645439	-1.0328	0.03855	0.227979	no	OK	8.12361	4.63851	-0.808461	-1.3146	0.0104	0.0903976	no
XLOC_000454	CR43866	TSS607	chr2L:6000227-6006827	1.18165	2.73226	1.95143	1.79261	1.03597	1.18561	0.842429	1.81389	0.918211	1.466	2.54783	1.73313	OK	1.66629	1.91449	0.200317	0.126022	0.8085	0.974385	no	OK	1.66629	1.21948	-0.450381	-0.264769	0.6013	0.917774	no	OK	1.91449	1.21948	-0.650698	-0.400003	0.42585	0.825261	no
XLOC_000455	CG13996	TSS608	chr2L:6020834-6021718	0	0	0	0	0	0	0	0	0	0	0	0	NOTEST	0	0	0	0	1	1	no	NOTEST	0	0	0	0	1	1	no	NOTEST	0	0	0	0	1	1	no
XLOC_000456	CG31643	TSS609	chr2L:6038116-6046050	1.1883	0.609643	3.25962	1.68383	2.76268	2.33541	3.05816	2.75386	3.50234	3.67967	3.30577	2.1145	OK	3.15057	1.68535	-0.902564	-0.781462	0.1485	0.516341	no	OK	3.15057	2.72753	-0.208018	-0.204465	0.68925	0.947524	no	OK	1.68535	2.72753	0.694546	0.592631	0.2693	0.683179	no
XLOC_000457	CG12393	TSS610,TSS611,TSS612	chr2L:6046515-6050474	23.0021	22.751	17.8749	19.3241	22.3605	23.6563	20.8244	20.077	22.3464	20.0214	16.9341	18.8108	OK	19.5282	20.738	0.0867203	0.108797	0.8276	0.977446	no	OK	19.5282	21.7296	0.154101	0.201827	0.68095	0.945423	no	OK	20.738	21.7296	0.0673805	0.0877024	0.85895	0.982051	no
XLOC_000458	CG9135	TSS613	chr2L:6050799-6053877	57.0004	55.6988	43.0129	48.1188	57.871	63.1572	60.4628	47.287	52.3644	62.9642	51.6863	52.476	OK	54.8727	50.9577	-0.106789	-0.279007	0.584	0.912059	no	OK	54.8727	57.1945	0.0597871	0.156438	0.7511	0.963073	no	OK	50.9577	57.1945	0.166576	0.433622	0.3878	0.795973	no
XLOC_000459	CG13995	TSS614	chr2L:6054301-6060169	0	0.0267218	0.137675	0.104889	0.0172947	0.120052	0.0984116	0.0901389	0.057213	0.0759747	0.0869879	0.178592	NOTEST	0.0996918	0.0673215	-0.566408	0	1	1	no	NOTEST	0.0996918	0.0814743	-0.291129	0	1	1	no	NOTEST	0.0673215	0.0814743	0.275279	0	1	1	no
XLOC_000460	CG34180	TSS615	chr2L:6060509-6062757	0	0	0	0.979292	0.272358	0.629965	0.818947	0.729545	0	0.975868	0.427884	0.933867	OK	0.584405	0.244823	-1.25523	-0.110538	0.56015	0.902108	no	OK	0.584405	0.612704	0.0682217	0.00644548	0.9547	0.993542	no	OK	0.244823	0.612704	1.32345	0.110401	0.4953	0.868634	no
XLOC_000461	CG13994	TSS616	chr2L:6062988-6065953	11.1947	12.8175	20.1659	19.9053	22.1089	17.8691	22.384	17.9255	21.5152	22.3981	23.908	17.7579	OK	21.3948	16.0209	-0.417308	-0.495351	0.3141	0.730338	no	OK	21.3948	20.0719	-0.0920834	-0.120823	0.80445	0.973334	no	OK	16.0209	20.0719	0.325225	0.382462	0.44355	0.836071	no
XLOC_000462	CG9147	TSS617	chr2L:6065996-6067635	5.66758	2.84131	5.83108	5.49367	7.67659	4.83087	6.22126	4.90602	7.97716	7.83895	6.13574	5.01056	OK	6.7406	4.95841	-0.443	-0.594283	0.2357	0.650134	no	OK	6.7406	5.90869	-0.19004	-0.263349	0.6075	0.920756	no	OK	4.95841	5.90869	0.252959	0.336517	0.51075	0.878506	no
XLOC_000463	CG13993	TSS618	chr2L:6069078-6070686	72.9741	94.0571	67.3832	70.9028	99.6442	81.2951	70.1061	59.5212	75.9234	84.1908	64.352	70.994	OK	73.8651	76.3293	0.0473453	0.0959235	0.84475	0.980781	no	OK	73.8651	77.6416	0.0719388	0.145304	0.7689	0.967267	no	OK	76.3293	77.6416	0.0245934	0.0501208	0.9179	0.989731	no
XLOC_000464	Kr-h2	TSS619,TSS620	chr2L:6070989-6073961	71.4334	64.7662	60.7947	62.3953	60.738	58.8462	59.7972	61.6681	52.4069	64.348	65.3404	61.967	OK	61.0156	64.8474	0.0878715	0.222836	0.6567	0.936799	no	OK	61.0156	60.2624	-0.0179205	-0.0453436	0.9272	0.990915	no	OK	64.8474	60.2624	-0.105792	-0.269332	0.5929	0.915103	no
XLOC_000465	CR44773,CR9162	TSS621,TSS622	chr2L:6078452-6080128	0	0	0.410569	0.508746	0.416018	0.160945	0.531741	0.634974	0	0.113878	0.0439715	0.438963	NOTEST	0.149203	0.229829	0.623282	0	1	1	no	NOTEST	0.149203	0.43592	1.54678	0	1	1	no	NOTEST	0.229829	0.43592	0.923503	0	1	1	no
XLOC_000466	Kr-h1	TSS623,TSS624	chr2L:6082602-6096498	63.2929	70.7194	36.8866	39.2889	24.0937	22.1169	25.2001	28.7353	20.5014	21.5514	24.3665	18.259	OK	21.1696	52.5469	1.31161	3.40855	5e-05	0.00129868	yes	OK	21.1696	25.0365	0.242039	0.623697	0.21725	0.627166	no	OK	52.5469	25.0365	-1.06958	-2.81566	5e-05	0.00129868	yes
XLOC_000467	stai	TSS625,TSS626,TSS627	chr2L:6100376-6124653	10.4519	11.0153	6.25575	5.39768	11.9334	9.29341	6.69846	16.8939	8.92711	4.26006	6.79984	6.1117	OK	6.52468	8.28014	0.343749	0.570289	0.26105	0.67425	no	OK	6.52468	11.2048	0.780138	1.34055	0.00955	0.0850232	no	OK	8.28014	11.2048	0.436389	0.762856	0.1294	0.482959	no
XLOC_000468	CG31642	TSS628	chr2L:6100376-6124653	0.594185	0.43327	0.157529	0.259412	0.249598	0.120315	0.216385	0.913469	0	0.182525	0.225845	0.155209	NOTEST	0.140895	0.361099	1.35778	0	1	1	no	NOTEST	0.140895	0.374942	1.41205	0	1	1	no	NOTEST	0.361099	0.374942	0.0542733	0	1	1	no
XLOC_000469	Arpc4	TSS629	chr2L:6125131-6127775	229.164	189.501	149.337	152.491	130.779	130.736	119.443	123.428	124.107	146.006	153.409	128.379	OK	137.975	180.123	0.384574	0.841115	0.09425	0.403729	no	OK	137.975	126.097	-0.129879	-0.2754	0.57325	0.907817	no	OK	180.123	126.097	-0.514453	-1.13415	0.02345	0.162875	no
XLOC_000470	CG9222	TSS630	chr2L:6131022-6132484	1.21263	0.152873	0.39205	0.411035	0.347402	0.1531	0.21823	0.233327	0.489269	0.108704	0.467526	0.228617	OK	0.323529	0.542147	0.74479	0.368964	0.48095	0.858619	no	NOTEST	0.323529	0.238015	-0.442844	0	1	1	no	OK	0.542147	0.238015	-1.18763	-0.583221	0.2784	0.694798	no
XLOC_000471	CG13991	TSS631	chr2L:6139381-6145010	1.9956	0.895686	1.31138	1.15744	0.182934	0.0470322	0.0900871	0.0916494	0.112233	0.0148911	0.0341423	0.0688326	OK	0.0575248	1.34003	4.54194	3.1773	0.00035	0.00662569	yes	NOTEST	0.0575248	0.102926	0.839348	0	1	1	no	OK	1.34003	0.102926	-3.70259	-3.1092	5e-05	0.00129868	yes
XLOC_000472	Muc26B	TSS632	chr2L:6151968-6153701	3.52409	1.99882	1.54717	0.838746	0	0.314186	0.209902	0.279423	0	0	0.0617695	0.0657395	OK	0.0318772	1.97721	5.95479	2.52392	0.2555	0.668271	no	NOTEST	0.0318772	0.200878	2.65572	0	1	1	no	OK	1.97721	0.200878	-3.29907	-2.16899	0.00265	0.032582	yes
XLOC_000473	CG13989	TSS633	chr2L:6160399-6161309	0	0.748653	0.753072	0.790168	0.406335	0.501363	0.152191	0.11376	0	0	0.133995	0.0286606	OK	0.0406638	0.572973	3.81665	1.18664	0.24295	0.656974	no	NOTEST	0.0406638	0.293412	2.85111	0	1	1	no	OK	0.572973	0.293412	-0.965538	-0.504679	0.3557	0.768675	no
XLOC_000474	CG34380	TSS634	chr2L:6179132-6211114	10.463	8.16652	21.819	11.5329	13.2151	7.61048	8.26152	17.8337	7.84194	3.82378	8.40007	7.19741	OK	6.8158	12.9954	0.931045	2.10092	5e-05	0.00129868	yes	OK	6.8158	11.7302	0.783274	1.76812	0.00025	0.00508582	yes	OK	12.9954	11.7302	-0.147771	-0.346361	0.4852	0.86121	no
XLOC_000475	Ugt37b1	TSS635	chr2L:6225047-6226842	0	0.21827	1.22371	0	0	0	0.0222882	0.250359	0	0	0.49197	0.0125638	NOTEST	0.126133	0.360496	1.51503	0	1	1	no	NOTEST	0.126133	0.0681619	-0.887912	0	1	1	no	NOTEST	0.360496	0.0681619	-2.40295	0	1	1	no
XLOC_000476	CR44823	TSS636	chr2L:6231806-6232160	0	0	0	0	0	0	0	0	0	0	0	0	NOTEST	0	0	0	0	1	1	no	NOTEST	0	0	0	0	1	1	no	NOTEST	0	0	0	0	1	1	no
XLOC_000477	Ddr	TSS637	chr2L:6253122-6323466	4.62126	2.86574	2.42668	1.50702	2.63632	2.73827	3.23546	3.67493	1.7115	0.901844	2.00791	2.06242	OK	1.67092	2.85518	0.772936	1.13011	0.0245	0.167726	no	OK	1.67092	3.07125	0.878181	1.30743	0.01035	0.0900724	no	OK	2.85518	3.07125	0.105245	0.169832	0.73695	0.960305	no
XLOC_000478	CG9486	TSS638	chr2L:6253122-6323466	0	0	1.32852	0.242428	0.405148	0.187462	0.758765	1.55081	0	0.353996	0.356277	0.571554	NOTEST	0.320457	0.392737	0.293435	0	1	1	no	OK	0.320457	0.725545	1.17894	0.331074	0.5186	0.881309	no	OK	0.392737	0.725545	0.885501	0.262507	0.66985	0.941751	no
XLOC_000479	CR42735	TSS639	chr2L:6253122-6323466	0	0	0	0	1.42498	0	0	0	0	0	0	0	NOTEST	0	0	0	0	1	1	no	NOTEST	0	0.356245	inf	0	1	1	no	NOTEST	0	0.356245	inf	0	1	1	no
XLOC_000480	CG13984	TSS640	chr2L:6253122-6323466	0	0	0	0	0	0	0	0	0.123764	0	0	0.0803553	NOTEST	0.0510299	0	#NAME?	0	1	1	no	NOTEST	0.0510299	0	#NAME?	0	1	1	no	NOTEST	0	0	0	0	1	1	no
XLOC_000481	PDZ-GEF	TSS641	chr2L:6323766-6332789	10.2252	17.4268	17.2794	17.7709	15.5301	20.1098	20.2959	19.7682	17.7388	21.9429	22.9145	19.1143	OK	20.4276	15.6756	-0.382	-0.972935	0.0554	0.291117	no	OK	20.4276	18.926	-0.110151	-0.28246	0.57905	0.910025	no	OK	15.6756	18.926	0.271849	0.691452	0.1751	0.562691	no
XLOC_000482	Cpr	TSS642,TSS643,TSS644,TSS645	chr2L:6338835-6346280	31.0162	28.4325	26.9701	32.8057	63.9797	60.5395	48.211	47.4217	60.6736	53.1697	33.3294	121.325	OK	67.1244	29.8061	-1.17123	-2.89845	5e-05	0.00129868	yes	OK	67.1244	55.038	-0.28641	-0.728474	0.15285	0.524143	no	OK	29.8061	55.038	0.884818	2.24139	5e-05	0.00129868	yes
XLOC_000483	ppk14	TSS646	chr2L:6354955-6356498	0	0	0.130767	0	0.0454774	0.0701471	0.0285915	0	0.0997162	0	0.075685	0.129	NOTEST	0.0761002	0.0326916	-1.21898	0	1	1	no	NOTEST	0.0761002	0.036054	-1.07774	0	1	1	no	NOTEST	0.0326916	0.036054	0.141237	0	1	1	no
XLOC_000484	CR44778	TSS647	chr2L:6360402-6361385	0	0	0	0	0	0	0	0	0	0	0	0	NOTEST	0	0	0	0	1	1	no	NOTEST	0	0	0	0	1	1	no	NOTEST	0	0	0	0	1	1	no
XLOC_000485	CG9505	TSS648	chr2L:6367881-6370190	4.73432	6.17096	9.78532	7.48351	2.59569	2.98293	2.11338	5.48603	9.77151	13.2552	12.5917	14.5568	OK	12.5438	7.04353	-0.832603	-1.55311	0.00295	0.0354483	yes	OK	12.5438	3.29451	-1.92884	-3.0906	5e-05	0.00129868	yes	OK	7.04353	3.29451	-1.09624	-1.65322	0.001	0.0153887	yes
XLOC_000486	slam	TSS649,TSS650	chr2L:6372387-6377284	2.95308	2.18405	2.88773	4.28828	1.50733	1.2363	1.3114	2.27147	3.49842	3.48524	6.31402	5.02927	OK	4.58174	3.07828	-0.573768	-0.963854	0.0545	0.287974	no	OK	4.58174	1.58162	-1.53449	-2.22363	0.0001	0.00237535	yes	OK	3.07828	1.58162	-0.960721	-1.33718	0.00835	0.0771223	no
XLOC_000487	CG9507	TSS651	chr2L:6377770-6411326	0.228514	0.734354	0	0.0635076	0	0	0	0	0	0	0	0.0198994	NOTEST	0.00497486	0.256594	5.68869	0	1	1	no	NOTEST	0.00497486	0	#NAME?	0	1	1	no	NOTEST	0.256594	0	#NAME?	0	1	1	no
XLOC_000488	CG13982	TSS652	chr2L:6412314-6423310	0.489059	0.728004	0.204965	0.215955	0.112237	0.274414	0.179608	0.420381	0.0784323	0.0985661	0.162863	0.190617	NOTEST	0.13262	0.409496	1.62655	0	1	1	no	NOTEST	0.13262	0.24666	0.89523	0	1	1	no	NOTEST	0.409496	0.24666	-0.731324	0	1	1	no
XLOC_000489	Fic	TSS653	chr2L:6424335-6426371	6.13678	7.15691	6.7137	6.24321	4.92463	4.48427	4.14613	5.61054	5.62382	10.1063	5.32426	6.33293	OK	6.84681	6.56265	-0.0611548	-0.0988365	0.8388	0.979638	no	OK	6.84681	4.79139	-0.514989	-0.790194	0.10285	0.423701	no	OK	6.56265	4.79139	-0.453834	-0.69538	0.15055	0.52012	no
XLOC_000490	frj	TSS654,TSS655	chr2L:6456051-6459008	8.07728	11.2072	10.0033	10.4846	7.7228	5.8674	9.63392	8.6732	7.83005	9.54792	11.544	9.56881	OK	9.62269	9.94309	0.0472531	0.0888185	0.8557	0.981712	no	OK	9.62269	7.97433	-0.271077	-0.49016	0.32515	0.742048	no	OK	9.94309	7.97433	-0.31833	-0.578951	0.24565	0.660458	no
XLOC_000491	DLP	TSS656	chr2L:6480660-6488756	17.1154	16.6048	24.8954	21.8787	19.3113	20.7304	23.083	24.1341	21.4342	23.1771	28.2887	20.937	OK	23.4593	20.1236	-0.221271	-0.561299	0.26445	0.677105	no	OK	23.4593	21.8147	-0.104857	-0.268107	0.5909	0.914559	no	OK	20.1236	21.8147	0.116414	0.295258	0.55315	0.898682	no
XLOC_000492	epsilonCOP	TSS657	chr2L:6489089-6490843	65.3223	57.0134	47.7273	52.8216	46.0347	49.6756	50.3394	45.5552	47.0086	49.5917	55.3597	44.2981	OK	49.0645	55.7212	0.183545	0.415984	0.4086	0.813309	no	OK	49.0645	47.9012	-0.0346185	-0.0764477	0.87655	0.98534	no	OK	55.7212	47.9012	-0.218163	-0.489931	0.32685	0.743379	no
XLOC_000493	CG31638	TSS658	chr2L:6491060-6496988	14.594	15.7183	13.3772	15.06	13.8036	12.6791	13.4298	12.7171	11.365	12.9789	13.4182	12.5006	OK	12.5656	14.6874	0.225092	0.418561	0.40305	0.809212	no	OK	12.5656	13.1574	0.0663901	0.122029	0.8101	0.97483	no	OK	14.6874	13.1574	-0.158702	-0.301795	0.54895	0.896838	no
XLOC_000494	CG9550	TSS659	chr2L:6497052-6498466	0.802706	0	0.0353905	0.18552	0.295656	0	0.0309563	0.0231688	0	0	0.054617	0.0698475	NOTEST	0.0311161	0.255904	3.03987	0	1	1	no	NOTEST	0.0311161	0.0874453	1.49072	0	1	1	no	NOTEST	0.255904	0.0874453	-1.54915	0	1	1	no
XLOC_000495	CG31637	TSS660	chr2L:6498646-6526996	12.3267	10.1765	10.4422	11.7021	6.92233	7.57548	8.27177	9.53425	6.50741	8.32485	9.30131	9.46756	OK	8.40028	11.1619	0.410069	0.808841	0.1029	0.423724	no	OK	8.40028	8.07596	-0.0568042	-0.106869	0.82795	0.977497	no	OK	11.1619	8.07596	-0.466873	-0.917051	0.06855	0.331101	no
XLOC_000496	CR44776	TSS661	chr2L:6551853-6552436	0	0	0	0	0	0	0	0	0	0	0	0	NOTEST	0	0	0	0	1	1	no	NOTEST	0	0	0	0	1	1	no	NOTEST	0	0	0	0	1	1	no
XLOC_000497	CoVb	TSS662	chr2L:6557799-6559308	196.446	172.881	188.836	212.067	229.335	243.872	217.908	161.248	221.226	192.484	169.039	185.747	OK	192.124	192.557	0.00324883	0.00816476	0.9873	0.997708	no	OK	192.124	213.091	0.149428	0.376876	0.44985	0.839854	no	OK	192.557	213.091	0.146179	0.369339	0.46085	0.846422	no
XLOC_000498	CG11043	TSS663	chr2L:6559425-6562289	1.25984	2.14638	2.80972	1.56215	0.701411	1.71272	1.01449	1.0277	0.126354	1.1032	0.636678	1.64037	OK	0.87665	1.94452	1.14934	0.348729	0.6424	0.933371	no	OK	0.87665	1.11408	0.34578	0.0943288	0.86395	0.983411	no	OK	1.94452	1.11408	-0.803562	-0.265168	0.71405	0.955236	no
XLOC_000499	Ent2	TSS664	chr2L:6562324-6566181	41.3135	40.7314	45.6769	46.1862	67.7925	70.4799	69.388	46.4295	54.3071	58.9792	44.1769	54.72	OK	53.0458	43.477	-0.286987	-0.704243	0.15555	0.52928	no	OK	53.0458	63.5225	0.260028	0.648333	0.1951	0.593827	no	OK	43.477	63.5225	0.547015	1.35287	0.00775	0.0729698	no
XLOC_000500	CG11050	TSS665,TSS666,TSS667	chr2L:6611010-6617117	42.0588	46.1592	69.9117	57.652	57.8254	55.9645	63.4671	66.5908	60.8556	52.4437	67.6231	51.3001	OK	58.0557	53.9454	-0.105936	-0.270777	0.58785	0.913146	no	OK	58.0557	60.962	0.0704726	0.181999	0.7203	0.956911	no	OK	53.9454	60.962	0.176409	0.451436	0.37065	0.782306	no
XLOC_000501	CR44913	TSS668	chr2L:6617133-6621700	0	0	2.51947	2.65641	2.27895	0.878577	1.87985	3.04374	5.06481	2.24341	5.05651	2.0475	OK	3.60306	1.29397	-1.47742	-0.770808	0.35615	0.769066	no	OK	3.60306	2.02028	-0.834666	-0.413279	0.47765	0.856825	no	OK	1.29397	2.02028	0.64275	0.304205	0.73365	0.959988	no
XLOC_000502	CG34345	TSS669	chr2L:6623111-6632407	0	0.213253	0.249109	0.46993	0	0.159946	0.304888	0.538194	0.607658	0.126342	0.115374	0.282338	NOTEST	0.282928	0.233073	-0.279653	0	1	1	no	NOTEST	0.282928	0.250757	-0.174147	0	1	1	no	NOTEST	0.233073	0.250757	0.105506	0	1	1	no
XLOC_000503	Tango1	TSS670	chr2L:6649387-6654574	25.2187	32.7441	24.6633	25.4067	25.6743	29.2758	29.2958	29.7239	29.9683	27.5287	30.4899	28.8484	OK	29.2088	27.0082	-0.113008	-0.297683	0.5497	0.897244	no	OK	29.2088	28.4925	-0.0358252	-0.0947195	0.8465	0.981132	no	OK	27.0082	28.4925	0.0771826	0.201914	0.6832	0.945935	no
XLOC_000504	CG11070	TSS671	chr2L:6658516-6662033	8.92095	12.8053	11.4968	11.6909	15.6968	13.8874	15.6547	13.0788	12.7871	12.5901	11.2857	12.3138	OK	12.2442	11.2285	-0.12493	-0.277631	0.58455	0.912079	no	OK	12.2442	14.5794	0.251836	0.57715	0.2434	0.657198	no	OK	11.2285	14.5794	0.376767	0.851591	0.0852	0.378853	no
XLOC_000505	CG34310,cup	TSS672,TSS673,TSS674	chr2L:6663663-6676635	16.4243	23.112	19.2837	19.6521	32.1497	31.0731	26.748	22.137	25.83	28.146	20.4544	24.5317	OK	24.7405	19.618	-0.334695	-0.398327	0.42775	0.826187	no	OK	24.7405	28.0269	0.179939	0.222001	0.6605	0.93838	no	OK	19.618	28.0269	0.514634	0.603587	0.2283	0.640901	no
XLOC_000506	Aatf	TSS675	chr2L:6717624-6719389	16.0598	14.6411	23.4685	21.7512	25.9446	31.2162	25.6076	20.936	32.9555	37.7168	26.316	39.6142	OK	34.1506	18.9801	-0.847422	-1.87094	0.0003	0.00585337	yes	OK	34.1506	25.9261	-0.397506	-0.915329	0.06955	0.333735	no	OK	18.9801	25.9261	0.449916	0.972697	0.05345	0.284209	no
XLOC_000507	Liprin-alpha	TSS676	chr2L:6723902-6732766	30.7388	31.1134	23.3567	28.9271	23.3997	27.5002	26.5436	29.5573	26.7705	26.1082	26.172	27.5615	OK	26.653	28.534	0.0983812	0.262481	0.59425	0.91576	no	OK	26.653	26.7502	0.00524991	0.0138792	0.9775	0.996794	no	OK	28.534	26.7502	-0.0931313	-0.248733	0.62115	0.925613	no
XLOC_000508	TTLL3B	TSS677	chr2L:6732865-6736149	0.424898	0.331277	0.296129	0.531824	0.350925	0.225551	0.197133	0.3416	0.773582	0.22834	0.217782	0.513545	NOTEST	0.433312	0.396032	-0.129789	0	1	1	no	NOTEST	0.433312	0.278802	-0.636164	0	1	1	no	NOTEST	0.396032	0.278802	-0.506375	0	1	1	no
XLOC_000509	CG11221	TSS678	chr2L:6742501-6756133	0	0	0.0943481	0.0988473	0.0306983	0.0710298	0.0193569	0.0289966	0	0.0224497	0	0.0387012	NOTEST	0.0152877	0.0482989	1.65962	0	1	1	no	NOTEST	0.0152877	0.0375204	1.2953	0	1	1	no	NOTEST	0.0482989	0.0375204	-0.364314	0	1	1	no
XLOC_000510	snoRNA:Me28S-G2743	TSS679	chr2L:6742501-6756133	0	0	0	0	0	0	0	0	0	0	0	0	NOTEST	0	0	0	0	1	1	no	NOTEST	0	0	0	0	1	1	no	NOTEST	0	0	0	0	1	1	no
XLOC_000511	CG17378	TSS680,TSS681	chr2L:6774040-6778444	4.23317	5.06311	3.60407	1.4839	4.53008	1.9674	1.21891	3.6826	2.21009	1.11	1.57832	1.34614	OK	1.56114	3.59606	1.20382	1.62108	0.0023	0.0292331	yes	OK	1.56114	2.84975	0.868236	1.11064	0.02825	0.185204	no	OK	3.59606	2.84975	-0.335583	-0.47878	0.3336	0.749971	no
XLOC_000512	CR43610	TSS682	chr2L:6799195-6799600	0	0	0	0	0	0	0.19528	0	0	0.468605	0	0	NOTEST	0.117151	0	#NAME?	0	1	1	no	NOTEST	0.117151	0.04882	-1.26283	0	1	1	no	NOTEST	0	0.04882	inf	0	1	1	no
XLOC_000513	CG11236	TSS683	chr2L:6803010-6805792	0	0	1.63152	0.0416595	0	0.427934	0.20884	0.180752	0	0	0.669498	0.0778858	NOTEST	0.186846	0.418294	1.16267	0	1	1	no	NOTEST	0.186846	0.204382	0.129415	0	1	1	no	NOTEST	0.418294	0.204382	-1.03325	0	1	1	no
XLOC_000514	CR44081	TSS684	chr2L:6812639-6813110	0	0	0	0	0	0.286569	0	0	0	0	0	0.0645337	NOTEST	0.0161334	0	#NAME?	0	1	1	no	NOTEST	0.0161334	0.0716423	2.15076	0	1	1	no	NOTEST	0	0.0716423	inf	0	1	1	no
XLOC_000515	sens-2	TSS685,TSS686	chr2L:6821933-6838995	4.26539	5.45532	8.14457	10.0096	11.3747	11.4163	13.5485	9.84078	7.74192	11.6512	10.6076	12.71	OK	10.6777	6.96873	-0.615629	-1.26414	0.01195	0.100013	no	OK	10.6777	11.5451	0.112683	0.25183	0.61715	0.924078	no	OK	6.96873	11.5451	0.728312	1.49911	0.00265	0.032582	yes
XLOC_000516	Rca1	TSS687	chr2L:6852314-6853866	4.47975	5.39186	8.2756	7.70372	9.00528	9.76675	10.4496	7.12277	6.57426	9.95845	10.3177	6.3055	OK	8.28898	6.46273	-0.35905	-0.553076	0.2509	0.66434	no	OK	8.28898	9.08609	0.132465	0.215655	0.6562	0.93671	no	OK	6.46273	9.08609	0.491516	0.76777	0.12775	0.479553	no
XLOC_000517	l(2)k09022	TSS688	chr2L:6854141-6860849	6.05085	8.30378	19.6036	17.5029	14.5425	18.8143	18.3535	18.1767	20.1484	28.6763	22.7549	23.3889	OK	23.7421	12.8653	-0.883963	-2.20041	5e-05	0.00129868	yes	OK	23.7421	17.4718	-0.442423	-1.16199	0.02095	0.150025	no	OK	12.8653	17.4718	0.44154	1.08818	0.0262	0.175832	no
XLOC_000518	CR44914	TSS689	chr2L:6872713-6874378	0	0	0.0724351	0.135934	0.180949	0.0778031	0.0756164	0.197995	0.220976	0.307981	0.363296	0.191899	NOTEST	0.271038	0.0520924	-2.37935	0	1	1	no	NOTEST	0.271038	0.133091	-1.02608	0	1	1	no	NOTEST	0.0520924	0.133091	1.35327	0	1	1	no
XLOC_000519	Nlg2	TSS690,TSS691	chr2L:6874899-6906656	0.426989	0.61536	0.0960121	0.146277	0.204784	0.0492557	0.30503	0.222238	0.0664872	0.247063	0.208983	0.170739	NOTEST	0.173318	0.32116	0.889869	0	1	1	no	NOTEST	0.173318	0.195327	0.172468	0	1	1	no	NOTEST	0.32116	0.195327	-0.717401	0	1	1	no
XLOC_000520	mir-932	TSS692	chr2L:6874899-6906656	0	0	0	0	0	0	0	0	0	0	0	0	NOTEST	0	0	0	0	1	1	no	NOTEST	0	0	0	0	1	1	no	NOTEST	0	0	0	0	1	1	no
XLOC_000521	Rat1	TSS693	chr2L:6908082-6914138	7.06173	8.52808	13.0088	11.2755	13.5545	13.095	16.8434	12.0591	16.881	21.1473	15.7266	15.0024	OK	17.1893	9.96853	-0.786062	-1.42652	0.0064	0.0640515	no	OK	17.1893	13.888	-0.307677	-0.584386	0.2433	0.657198	no	OK	9.96853	13.888	0.478385	0.837029	0.099	0.415191	no
XLOC_000522	Hrb27C	TSS694,TSS695,TSS696,TSS697	chr2L:6920703-6932057	250.349	306.964	308.407	295.798	280.395	318.169	330.466	299.07	262.129	341.194	283.304	331.742	OK	304.592	290.379	-0.0689402	-0.18011	0.7124	0.954927	no	OK	304.592	307.025	0.0114763	0.0300381	0.95125	0.993348	no	OK	290.379	307.025	0.0804165	0.209445	0.6726	0.942248	no
XLOC_000523	CG43232	TSS698	chr2L:6932120-6942814	0	0	0	0.399081	0	0.642523	0.166875	0.990899	0	0.994892	0	0.856546	NOTEST	0.46286	0.0997703	-2.21389	0	1	1	no	NOTEST	0.46286	0.450074	-0.0404118	0	1	1	no	NOTEST	0.0997703	0.450074	2.17348	0	1	1	no
XLOC_000524	SA	TSS699	chr2L:6950420-6956950	7.11694	13.4674	15.5984	12.513	13.2491	15.4703	16.5045	16.2037	14.4193	16.74	15.3511	14.019	OK	15.1323	12.174	-0.313837	-0.703934	0.1553	0.528744	no	OK	15.1323	15.3569	0.0212498	0.0489445	0.9224	0.990387	no	OK	12.174	15.3569	0.335087	0.75181	0.1316	0.48698	no
XLOC_000525	CG3430	TSS700	chr2L:6957007-6960328	0.670419	2.37635	3.46613	2.84059	11.0268	7.67308	10.4293	4.98946	4.13216	2.88319	4.16807	5.02393	OK	4.05184	2.33837	-0.793072	-0.706865	0.1577	0.533174	no	OK	4.05184	8.52967	1.07391	1.39773	0.00805	0.0750538	no	OK	2.33837	8.52967	1.86699	1.80268	0.0073	0.0699993	no
XLOC_000526	CG10399	TSS701	chr2L:6960376-6964074	4.28633	3.24265	4.57236	5.10281	4.44868	4.74001	4.77194	3.13055	5.05613	3.8007	5.08073	3.64566	OK	4.39581	4.30104	-0.0314425	-0.0280712	0.95525	0.993716	no	OK	4.39581	4.27279	-0.0409482	-0.0290042	0.95045	0.993315	no	OK	4.30104	4.27279	-0.00950568	-0.00725264	0.98775	0.997776	no
XLOC_000527	Coprox	TSS702	chr2L:6964420-6965887	22.8521	15.7665	20.6611	20.117	31.1966	29.2837	28.0181	24.2482	22.5359	26.9045	19.9559	24.2029	OK	23.3998	19.8492	-0.237419	-0.484123	0.33505	0.751749	no	OK	23.3998	28.1867	0.268516	0.570298	0.25225	0.665697	no	OK	19.8492	28.1867	0.505935	1.05875	0.0347	0.212589	no
XLOC_000528	CR44326	TSS703	chr2L:6972827-7010359	0	0	0	0	0	0	0	0	0	0	0	0	NOTEST	0	0	0	0	1	1	no	NOTEST	0	0	0	0	1	1	no	NOTEST	0	0	0	0	1	1	no
XLOC_000529	CG43321	TSS704	chr2L:7012261-7012803	0	0	0.105316	0	0	0	0	0	0	0	0	0	NOTEST	0	0.0263291	inf	0	1	1	no	NOTEST	0	0	0	0	1	1	no	NOTEST	0.0263291	0	#NAME?	0	1	1	no
XLOC_000530	CG43322	TSS705	chr2L:7013395-7023898	0	0	0.507081	0.341749	0.353125	0.350114	0.506896	0.379362	0.386743	0.0736505	0.558918	0.339563	NOTEST	0.339718	0.212208	-0.678863	0	1	1	no	NOTEST	0.339718	0.397374	0.226159	0	1	1	no	NOTEST	0.212208	0.397374	0.905022	0	1	1	no
XLOC_000531	Pcp	TSS706	chr2L:7013395-7023898	0	0.467517	0.577154	0.378636	1.52531	0.940923	0.568968	0.897123	0.88172	1.77376	1.22301	1.10829	OK	1.2467	0.355827	-1.80886	-0.235937	0.2314	0.644735	no	OK	1.2467	0.98308	-0.342729	-0.0554373	0.7909	0.970771	no	OK	0.355827	0.98308	1.46613	0.193846	0.34085	0.757341	no
XLOC_000532	CG3476	TSS707	chr2L:7027525-7028959	21.7554	14.7311	9.1311	13.6991	30.7166	32.4631	25.9764	16.1107	31.9339	24.0457	10.5968	37.3325	OK	25.9772	14.8292	-0.808808	-1.51679	0.0023	0.0292331	yes	OK	25.9772	26.3167	0.0187319	0.0382453	0.9383	0.992823	no	OK	14.8292	26.3167	0.82754	1.56617	0.00165	0.0226622	yes
XLOC_000533	CG11266,milt	TSS708,TSS709,TSS710,TSS711,TSS712	chr2L:7032720-7056010	78.987	82.2871	89.3004	79.6851	80.2273	85.9004	84.8311	86.7564	76.4884	91.4785	99.0103	88.9485	OK	88.9814	82.5649	-0.107976	-0.263629	0.6151	0.923037	no	OK	88.9814	84.4288	-0.0757692	-0.185018	0.7221	0.95706	no	OK	82.5649	84.4288	0.0322064	0.079745	0.87785	0.98534	no
XLOC_000534	Mnn1	TSS713	chr2L:7056300-7063586	12.417	17.4621	22.8451	20.187	11.8197	13.2412	13.8807	17.8896	13.8608	20.6273	23.1296	17.8724	OK	18.8725	18.2278	-0.0501466	-0.122304	0.8026	0.973334	no	OK	18.8725	14.2078	-0.409603	-0.975967	0.05105	0.275647	no	OK	18.2278	14.2078	-0.359456	-0.856245	0.0862	0.381699	no
XLOC_000535	Sem1	TSS714	chr2L:7063985-7065837	101.016	114.58	97.3953	107.603	161.065	145.009	157.369	117.615	103.636	93.0191	90.1241	123.007	OK	102.446	105.149	0.0375599	0.0720287	0.8826	0.985491	no	OK	102.446	145.264	0.503812	0.987903	0.0503	0.272677	no	OK	105.149	145.264	0.466252	0.930495	0.06235	0.31348	no
XLOC_000536	CG11289	TSS715	chr2L:7067982-7084635	0	0.255085	0.148847	0.156022	0.455091	0.0957229	0	0.194893	0.680932	0.211593	0	0.0880701	NOTEST	0.245149	0.139988	-0.80835	0	1	1	no	NOTEST	0.245149	0.186427	-0.395049	0	1	1	no	NOTEST	0.139988	0.186427	0.4133	0	1	1	no
XLOC_000537	CR44612	TSS716	chr2L:7098187-7157695	0	0	0	0	0	0	0.0251436	0	0	0	0	0.00708128	NOTEST	0.00177032	0	#NAME?	0	1	1	no	NOTEST	0.00177032	0.00628589	1.82811	0	1	1	no	NOTEST	0	0.00628589	inf	0	1	1	no
XLOC_000538	CG4495	TSS717	chr2L:7182233-7190010	25.4551	19.1015	20.1237	18.7594	16.7089	16.2497	19.84	20.7503	16.9505	16.9833	19.7949	17.75	OK	17.8697	20.8599	0.223222	0.465145	0.3581	0.771356	no	OK	17.8697	18.3872	0.0411926	0.0846824	0.8638	0.983411	no	OK	20.8599	18.3872	-0.182029	-0.382605	0.4451	0.836568	no
XLOC_000539	CR44989	TSS718	chr2L:7220368-7223081	14.9534	7.36772	8.69122	7.09588	8.95059	6.90076	12.087	7.72495	10.1335	18.0308	9.07901	8.4168	OK	11.415	9.52706	-0.260832	-0.181808	0.71195	0.954927	no	OK	11.415	8.91582	-0.356496	-0.238046	0.636	0.93114	no	OK	9.52706	8.91582	-0.0956642	-0.0608384	0.9039	0.988309	no
XLOC_000540	CG43799	TSS719	chr2L:7223327-7249343	0	0	0	0	0.0813864	0	0	0	0	0	0	0	NOTEST	0	0	0	0	1	1	no	NOTEST	0	0.0203466	inf	0	1	1	no	NOTEST	0	0.0203466	inf	0	1	1	no
XLOC_000541	CG31909	TSS720	chr2L:7255418-7277171	0	0	0	0	0	0	0	0	0	0	0	0	NOTEST	0	0	0	0	1	1	no	NOTEST	0	0	0	0	1	1	no	NOTEST	0	0	0	0	1	1	no
XLOC_000542	wg	TSS721	chr2L:7307158-7316265	0	0	0	0	0	0	0.0127587	0	0	0	0	0.0143733	NOTEST	0.00359334	0	#NAME?	0	1	1	no	NOTEST	0.00359334	0.00318967	-0.171915	0	1	1	no	NOTEST	0	0.00318967	inf	0	1	1	no
XLOC_000543	Wnt6	TSS722	chr2L:7333713-7352542	0	0	0	0	0	0	0	0	0	0	0	0	NOTEST	0	0	0	0	1	1	no	NOTEST	0	0	0	0	1	1	no	NOTEST	0	0	0	0	1	1	no
XLOC_000544	Wnt10	TSS723	chr2L:7363378-7377528	0	0	0	0.0381126	0	0	0	0	0	0	0	0	NOTEST	0	0.00952814	inf	0	1	1	no	NOTEST	0	0	0	0	1	1	no	NOTEST	0.00952814	0	#NAME?	0	1	1	no
XLOC_000545	ninaC	TSS724	chr2L:7377701-7384344	0	0	0.0231069	0.0242052	0	0	0.0375749	0	0.052813	0.116869	0.00892155	0.028421	NOTEST	0.0517562	0.011828	-2.12952	0	1	1	no	NOTEST	0.0517562	0.00939371	-2.46197	0	1	1	no	NOTEST	0.011828	0.00939371	-0.332442	0	1	1	no
XLOC_000546	gudu	TSS725	chr2L:7388507-7390902	0	0	0.0192564	0.0605314	0	0.102842	0.0504885	0	0	0	0.10407	0.0189654	NOTEST	0.0307589	0.019947	-0.624837	0	1	1	no	NOTEST	0.0307589	0.0383326	0.317568	0	1	1	no	NOTEST	0.019947	0.0383326	0.942404	0	1	1	no
XLOC_000547	CG5171	TSS726,TSS727,TSS728	chr2L:7401334-7404526	5.23647	3.29119	1.54434	4.9723	1.26506	1.86574	1.14183	0.942718	0.758425	0.210759	0.191675	0.979784	OK	0.535161	3.76108	2.8131	1.75037	0.00285	0.0345074	yes	OK	0.535161	1.30384	1.28472	0.757852	0.1144	0.450037	no	OK	3.76108	1.30384	-1.52838	-1.42677	0.01175	0.0988305	no
XLOC_000548	CG5177	TSS729	chr2L:7405226-7409809	1.89906	4.1265	1.91896	4.29752	2.41881	3.05474	1.5973	1.6699	1.68585	1.46937	2.03238	2.416	OK	1.9009	3.06051	0.687088	0.426275	0.4625	0.847573	no	OK	1.9009	2.18519	0.201074	0.118767	0.843	0.980781	no	OK	3.06051	2.18519	-0.486014	-0.312545	0.60745	0.920729	no
XLOC_000549	CG15818	TSS730	chr2L:7410908-7412229	1.83567	0.223148	0.763176	0.109105	0	0	0.0910266	0.204391	0	0.0705209	0	0.222491	OK	0.0732529	0.732776	3.32241	1.44315	0.2407	0.655711	no	NOTEST	0.0732529	0.0738544	0.0117976	0	1	1	no	OK	0.732776	0.0738544	-3.31062	-1.52706	0.2518	0.665368	no
XLOC_000550	chm	TSS731	chr2L:7412416-7422736	8.0896	7.94989	8.3008	8.10651	8.81331	10.168	9.54202	9.7721	7.29228	9.45366	9.11081	7.27905	OK	8.28395	8.1117	-0.0303143	-0.05842	0.909	0.988609	no	OK	8.28395	9.57385	0.208781	0.411338	0.41185	0.815241	no	OK	8.1117	9.57385	0.239095	0.46773	0.34625	0.761192	no
XLOC_000551	CR43857,mir-275	TSS732,TSS733	chr2L:7423819-7425932	0	0	0.156263	1.39682	0.14586	0.450574	0.8315	0.372783	0.965978	0.143026	0.189993	0.771527	OK	0.517631	0.38827	-0.414865	-0.141105	0.7545	0.963735	no	OK	0.517631	0.450179	-0.201425	-0.0730308	0.83405	0.978695	no	NOTEST	0.38827	0.450179	0.213441	0	1	1	no
XLOC_000552	mir-305	TSS734	chr2L:7425971-7426044	0	0	0	0	0	0	0	0	0	0	0	0	NOTEST	0	0	0	0	1	1	no	NOTEST	0	0	0	0	1	1	no	NOTEST	0	0	0	0	1	1	no
XLOC_000553	CG5261	TSS735,TSS736,TSS737	chr2L:7426865-7430329	34.6871	28.9044	35.2579	36.4214	30.7713	35.7819	34.3892	31.2444	36.7797	34.2553	35.9201	34.1924	OK	35.2869	33.8177	-0.0613547	-0.150763	0.76185	0.965356	no	OK	35.2869	33.0467	-0.0946274	-0.233587	0.64165	0.933017	no	OK	33.8177	33.0467	-0.0332727	-0.0815111	0.8696	0.98459	no
XLOC_000554	CG5973	TSS738,TSS739,TSS740	chr2L:7437491-7451244	0.132022	0	1.08266	0.183093	0	0.266668	0.0984443	0.202989	0.372931	0.568097	0.107804	0.310574	NOTEST	0.339852	0.349443	0.0401505	0	1	1	no	NOTEST	0.339852	0.142025	-1.25876	0	1	1	no	NOTEST	0.349443	0.142025	-1.29891	0	1	1	no
XLOC_000555	CG6055	TSS741,TSS742	chr2L:7466542-7472493	0	0	0.230356	0	0	0	0.0403163	0	0	0	0	0.113802	NOTEST	0.0284505	0.057589	1.01734	0	1	1	no	NOTEST	0.0284505	0.0100791	-1.49709	0	1	1	no	NOTEST	0.057589	0.0100791	-2.51443	0	1	1	no
XLOC_000556	CG6441	TSS743	chr2L:7472512-7496307	0.911733	1.09858	1.61597	0.783	3.77419	2.66332	1.83995	2.50299	2.93375	1.2451	1.34667	1.88072	OK	1.85156	1.10232	-0.748195	-0.304011	0.7248	0.957889	no	OK	1.85156	2.69511	0.541605	0.240845	0.7606	0.964793	no	OK	1.10232	2.69511	1.2898	0.564468	0.5013	0.873058	no
XLOC_000557	CR44082	TSS744	chr2L:7497804-7578980	0	0	0	0	0	0	0	0.108623	0	0	0	0.0832233	NOTEST	0.0208058	0	#NAME?	0	1	1	no	NOTEST	0.0208058	0.0271558	0.384275	0	1	1	no	NOTEST	0	0.0271558	inf	0	1	1	no
XLOC_000558	Spn28B	TSS745	chr2L:7581923-7583333	0	0	0	0	0	0	0.068673	0.0256878	0	0	0	0.038744	NOTEST	0.00968601	0	#NAME?	0	1	1	no	NOTEST	0.00968601	0.0235902	1.28421	0	1	1	no	NOTEST	0	0.0235902	inf	0	1	1	no
XLOC_000559	CR45370	TSS746	chr2L:7604242-7604563	0	0	0	0	0.371576	1.43344	0.657481	0.974002	0	0.528872	0	0.62804	NOTEST	0.289228	0	#NAME?	0	1	1	no	OK	0.289228	0.859126	1.57066	0.692851	0.37625	0.786834	no	OK	0	0.859126	inf	#NAME?	0.00055	0.00954679	yes
XLOC_000560	Cyp4d21	TSS747	chr2L:7605599-7607701	0	0	0.121256	0.0254153	1.31202	1.89406	1.12362	0.317542	0.813381	0.147576	0.280804	0.944016	OK	0.546444	0.0366679	-3.89748	-1.56055	0.21095	0.61827	no	OK	0.546444	1.16181	1.08823	0.84716	0.0978	0.412455	no	OK	0.0366679	1.16181	4.98571	2.03753	0.20905	0.614273	no
XLOC_000561	CG6739	TSS748	chr2L:7608388-7616533	0	0	0	0.165164	0.611108	0.487765	0.537661	0.175632	1.63528	2.95378	4.08853	3.02879	OK	2.92659	0.0412911	-6.14725	-2.69098	0.2222	0.632965	no	OK	2.92659	0.453042	-2.69151	-2.51695	0.0001	0.00237535	yes	NOTEST	0.0412911	0.453042	3.45574	0	1	1	no
XLOC_000562	CR44799	TSS749	chr2L:7636112-7636608	0	0	0	0	0	0	0	0	0	0	0	0	NOTEST	0	0	0	0	1	1	no	NOTEST	0	0	0	0	1	1	no	NOTEST	0	0	0	0	1	1	no
XLOC_000563	CR44800	TSS750	chr2L:7636950-7637324	0	0	0	0	0	0	0	0	0	0	0	0	NOTEST	0	0	0	0	1	1	no	NOTEST	0	0	0	0	1	1	no	NOTEST	0	0	0	0	1	1	no
XLOC_000564	Myo28B1	TSS751,TSS752	chr2L:7642004-7692683	80.3718	94.7689	65.0266	86.6989	80.595	84.9767	84.3768	86.446	81.7427	74.6728	90.606	143.739	OK	97.6901	81.7165	-0.257584	-0.625902	0.2156	0.624607	no	OK	97.6901	84.0986	-0.21613	-0.556532	0.2659	0.678995	no	OK	81.7165	84.0986	0.0414539	0.100376	0.84	0.98016	no
XLOC_000565	CG43235	TSS753	chr2L:7693029-7701601	2.0711	4.0322	2.64177	3.34494	4.82815	1.60768	1.97532	3.05145	4.39322	2.47075	4.071	2.19648	OK	3.28286	3.0225	-0.119211	-0.0161239	0.9209	0.989854	no	OK	3.28286	2.86565	-0.196091	-0.0313499	0.8824	0.985491	no	OK	3.0225	2.86565	-0.0768798	-0.0113331	0.9542	0.993526	no
XLOC_000566	Tep3	TSS754	chr2L:7702804-7710690	0	0.234358	0.118305	0.18587	0.151595	0.0719535	0.0664303	0.188112	0.244602	0.0683359	0.117479	0.153767	NOTEST	0.146046	0.134633	-0.117391	0	1	1	no	NOTEST	0.146046	0.119523	-0.289137	0	1	1	no	NOTEST	0.134633	0.119523	-0.171747	0	1	1	no
XLOC_000567	Ntl	TSS755,TSS756	chr2L:7710879-7713991	0	0	0.0710835	0	0	0.12673	0.0621387	0	0	0.192231	0.0182892	0	NOTEST	0.05263	0.0177709	-1.56637	0	1	1	no	NOTEST	0.05263	0.0472172	-0.156572	0	1	1	no	NOTEST	0.0177709	0.0472172	1.4098	0	1	1	no
XLOC_000568	CG7211	TSS757	chr2L:7747274-7747874	0	0	0	0	0	0	0	0	0	0	0	0	NOTEST	0	0	0	0	1	1	no	NOTEST	0	0	0	0	1	1	no	NOTEST	0	0	0	0	1	1	no
XLOC_000569	CR45718	TSS758	chr2L:7753202-7753393	0	0	0	0	0	0	0	0	0	0	0	0	NOTEST	0	0	0	0	1	1	no	NOTEST	0	0	0	0	1	1	no	NOTEST	0	0	0	0	1	1	no
XLOC_000570	CG7196	TSS759,TSS760	chr2L:7754173-7765915	0.33032	0	0.0872574	0	0.121827	0	0	0.199161	0.16366	0	0	0.021154	NOTEST	0.0462036	0.104394	1.17597	0	1	1	no	NOTEST	0.0462036	0.080247	0.796443	0	1	1	no	NOTEST	0.104394	0.080247	-0.379526	0	1	1	no
XLOC_000571	CG14538	TSS761	chr2L:7754173-7765915	0.276931	0	0	0	0	0	0	0	0	0	0	0	NOTEST	0	0.0692328	inf	0	1	1	no	NOTEST	0	0	0	0	1	1	no	NOTEST	0.0692328	0	#NAME?	0	1	1	no
XLOC_000572	CG7191	TSS762	chr2L:7767627-7775033	30.0163	13.3754	8.32708	4.53143	15.9417	11.6866	12.2308	40.398	12.1754	12.6188	21.9437	18.5723	OK	16.3275	14.0625	-0.215449	-0.400657	0.4207	0.822208	no	OK	16.3275	20.0642	0.29732	0.579832	0.243	0.656974	no	OK	14.0625	20.0642	0.512769	0.949652	0.0589	0.302892	no
XLOC_000573	CG7164,Uro	TSS763,TSS764	chr2L:7780084-7782760	0.276359	0.156782	0.700894	0.153268	0.245847	0.496171	0.192128	0.654302	0.332061	0.604773	1.35255	0.447638	OK	0.684256	0.321826	-1.08825	-0.609727	0.2115	0.619248	no	OK	0.684256	0.397112	-0.784989	-0.498401	0.34195	0.758026	no	NOTEST	0.321826	0.397112	0.303265	0	1	1	no
XLOC_000574	CG7154	TSS765	chr2L:7782864-7786061	20.4888	16.381	20.5955	19.7618	30.1711	33.3465	30.4495	25.2225	26.6791	29.6629	28.7005	24.6194	OK	27.4155	19.3068	-0.505882	-1.2246	0.0144	0.114651	no	OK	27.4155	29.7974	0.120197	0.301085	0.54625	0.895288	no	OK	19.3068	29.7974	0.626079	1.5214	0.00265	0.032582	yes
XLOC_000575	CR44825	TSS766	chr2L:7791174-7796260	0	0	0	0	0	0	0.561493	0.730366	0.9784	0	0.122505	0.239625	NOTEST	0.335132	0	#NAME?	0	1	1	no	NOTEST	0.335132	0.322965	-0.0533552	0	1	1	no	NOTEST	0	0.322965	inf	0	1	1	no
XLOC_000576	r2d2	TSS767,TSS768	chr2L:7800146-7810703	2.99312	8.18405	11.3497	10.5461	12.1095	13.2499	16.073	10.2884	13.6249	13.5205	9.98626	11.5001	OK	12.158	8.26824	-0.556251	-0.447923	0.3593	0.772438	no	OK	12.158	12.9302	0.0888415	0.0886683	0.8567	0.981712	no	OK	8.26824	12.9302	0.645092	0.531113	0.28275	0.699253	no
XLOC_000577	LanB1	TSS769,TSS770	chr2L:7811437-7820771	108.283	112.246	82.9575	109.827	58.9122	72.2387	85.7089	70.3584	59.1782	71.0192	72.6964	76.294	OK	69.797	103.329	0.566002	1.57828	0.00165	0.0226622	yes	OK	69.797	71.8046	0.0409114	0.1134	0.82185	0.977029	no	OK	103.329	71.8046	-0.525091	-1.45747	0.00345	0.0400931	yes
XLOC_000578	CG7115	TSS771,TSS772	chr2L:7821033-7827315	23.0881	18.2988	20.4578	16.7398	12.3837	14.2878	13.7359	16.2332	18.0377	19.049	16.9778	16.782	OK	17.7116	19.6461	0.149549	0.0420967	0.8542	0.981712	no	OK	17.7116	14.1602	-0.322858	-0.0857018	0.6858	0.946646	no	OK	19.6461	14.1602	-0.472408	-0.134962	0.577	0.90902	no
XLOC_000579	mts	TSS773,TSS774	chr2L:7827649-7833576	304.749	330.9	268.206	264.678	267.316	272.842	274.031	277.543	273.016	258.645	270.764	264.49	OK	266.729	292.133	0.131254	0.359763	0.47185	0.853283	no	OK	266.729	272.933	0.0331743	0.0907197	0.8543	0.981712	no	OK	292.133	272.933	-0.0980794	-0.271201	0.58445	0.912079	no
XLOC_000580	CG14537	TSS775	chr2L:7840451-7841262	0	0	0	0	0	0	0	0.12144	0	0	0	0	NOTEST	0	0	0	0	1	1	no	NOTEST	0	0.0303599	inf	0	1	1	no	NOTEST	0	0.0303599	inf	0	1	1	no
XLOC_000581	lectin-28C	TSS776	chr2L:7857076-7860839	0	0	0.0838164	0	0	0	0	0	0.0425742	0	0	0.00687473	NOTEST	0.0123622	0.0209541	0.761292	0	1	1	no	NOTEST	0.0123622	0	#NAME?	0	1	1	no	NOTEST	0.0209541	0	#NAME?	0	1	1	no
XLOC_000582	CG34132	TSS777	chr2L:7883281-7887513	27.1003	29.8649	46.6663	39.2412	80.9546	75.2803	65.7456	39.5282	58.4389	48.9482	37.9019	51.5817	OK	49.2177	35.7182	-0.462517	-0.584445	0.24195	0.656928	no	OK	49.2177	65.3772	0.409611	0.571094	0.2569	0.670122	no	OK	35.7182	65.3772	0.872128	1.12254	0.0257	0.173411	no
XLOC_000583	CG7231	TSS778,TSS779	chr2L:7891186-7986785	21.1189	21.7611	25.8074	20.5857	18.0879	17.7091	17.5117	19.9515	20.0012	10.0453	17.6143	15.2773	OK	15.7345	22.3183	0.504291	0.560258	0.2885	0.704467	no	OK	15.7345	18.3151	0.219096	0.24111	0.6441	0.933371	no	OK	22.3183	18.3151	-0.285195	-0.343044	0.5065	0.87625	no
XLOC_000584	CR44996	TSS780	chr2L:7994387-7998151	0	0.116624	0	0.0285445	0	0.0583323	0.0238118	0	0	0.0552775	0.168166	0.0268485	NOTEST	0.0625731	0.0362921	-0.785886	0	1	1	no	NOTEST	0.0625731	0.020536	-1.60739	0	1	1	no	NOTEST	0.0362921	0.020536	-0.821501	0	1	1	no
XLOC_000585	Sirup	TSS781	chr2L:7998868-8004286	41.6231	22.7448	22.9645	28.4406	81.057	84.9858	85.772	69.9244	85.7395	51.6018	66.769	94.7409	OK	74.7128	28.9432	-1.36813	-2.12903	0.0002	0.00422792	yes	OK	74.7128	80.4348	0.106464	0.212838	0.66555	0.94042	no	OK	28.9432	80.4348	1.47459	2.33397	0.0001	0.00237535	yes
XLOC_000586	Tg	TSS782,TSS783	chr2L:8011404-8026898	0	0.21158	0.0990216	0.101297	0.274025	0.22896	0.427178	0.367975	0	0	0	0	HIDATA	0	0.102975	0	0	1	1	no	HIDATA	0	0.324535	0	0	1	1	no	NOTEST	0.102975	0.324535	1.65608	0	1	1	no
XLOC_000587	baf	TSS784	chr2L:8026913-8040826	495.692	410.313	320.514	342.462	360.674	376.08	363.472	359.214	376.277	370.834	353.903	328.099	OK	357.278	392.245	0.13471	0.242644	0.62595	0.927441	no	OK	357.278	364.86	0.0302971	0.0439995	0.91965	0.989854	no	OK	392.245	364.86	-0.104413	-0.148194	0.7601	0.964782	no
XLOC_000588	Cka	TSS785,TSS786	chr2L:8026913-8040826	35.6759	39.8284	39.9037	40.7121	120.361	136.657	144.307	168.557	29.1185	42.9938	40.9301	38.3927	OK	37.8588	39.03	0.0439574	0.0765248	0.87905	0.98534	no	OK	37.8588	142.471	1.91196	3.79871	5e-05	0.00129868	yes	OK	39.03	142.471	1.86801	3.7299	5e-05	0.00129868	yes
XLOC_000589	CG7429	TSS787	chr2L:8041105-8042909	3.09796	1.05557	3.08958	1.70762	5.05837	4.16648	3.56444	4.417	0.621328	3.00472	2.88136	2.54146	OK	2.26222	2.23768	-0.0157299	-0.00121159	0.99125	0.99831	no	OK	2.26222	4.30157	0.927128	0.0828048	0.45605	0.842924	no	OK	2.23768	4.30157	0.942858	0.0857211	0.43165	0.828869	no
XLOC_000590	CG7466	TSS788	chr2L:8043470-8071624	1.98358	1.82061	2.94751	2.03888	2.71205	2.759	2.70563	3.74736	1.39663	2.78653	2.18307	1.96953	OK	2.08394	2.19764	0.0766438	0.0349179	0.962	0.994712	no	OK	2.08394	2.98101	0.516487	0.266954	0.7593	0.964769	no	OK	2.19764	2.98101	0.439844	0.216336	0.79285	0.971105	no
XLOC_000591	Trf	TSS789	chr2L:8072894-8073948	2.78073	3.05078	8.3174	4.05424	10.6067	9.81576	9.5502	7.78281	6.34701	11.2232	9.20739	7.01219	OK	8.44744	4.55079	-0.892398	-1.08878	0.0313	0.198515	no	OK	8.44744	9.43888	0.160101	0.220223	0.65525	0.936298	no	OK	4.55079	9.43888	1.0525	1.28743	0.0133	0.108027	no
XLOC_000592	CR45257	TSS790	chr2L:8074116-8083107	0	0	2.14878	1.36894	0	1.06727	0.381434	0	0	0.963606	0	0.444838	OK	0.352111	0.879432	1.32054	0.159352	0.53885	0.891512	no	NOTEST	0.352111	0.362177	0.040665	0	1	1	no	OK	0.879432	0.362177	-1.27988	-0.161846	0.54795	0.896381	no
XLOC_000593	Bsg	TSS791,TSS792,TSS793	chr2L:8083419-8116531	188.33	219.766	150.958	148.638	110.743	117.501	123.21	140.407	117.92	129.633	122.714	131.306	OK	125.393	176.923	0.496662	1.36223	0.00665	0.0657262	no	OK	125.393	122.965	-0.0282135	-0.0768917	0.8745	0.985234	no	OK	176.923	122.965	-0.524876	-1.43335	0.00485	0.0519931	no
XLOC_000594	CG8673	TSS794	chr2L:8124328-8126890	0	0	0.129506	0	0.630478	0.138927	0.113261	0	0	0.0657859	0.124927	0.223564	NOTEST	0.103569	0.0323764	-1.67758	0	1	1	no	NOTEST	0.103569	0.220667	1.09127	0	1	1	no	NOTEST	0.0323764	0.220667	2.76885	0	1	1	no
XLOC_000595	CG8668	TSS795	chr2L:8127000-8133989	26.5811	37.8166	18.8651	20.2848	21.129	22.7852	19.5017	19.0943	14.8028	15.318	16.4836	16.316	OK	15.7301	25.8869	0.718693	1.69567	0.0008	0.0129151	yes	OK	15.7301	20.6276	0.391044	0.919848	0.0624	0.313622	no	OK	25.8869	20.6276	-0.327649	-0.791301	0.11465	0.450711	no
XLOC_000596	CG43394	TSS796,TSS797	chr2L:8134246-8159638	0.200765	0.142151	0.692408	0.442841	0.496901	0.802903	3.0973	0.584036	0.730366	0.406306	0.479991	0.555284	OK	0.542987	0.369541	-0.555182	-0.141904	0.6729	0.942248	no	OK	0.542987	1.24529	1.19749	0.395107	0.40435	0.810427	no	OK	0.369541	1.24529	1.75267	0.473867	0.2867	0.703008	no
XLOC_000597	CG31606	TSS798	chr2L:8134246-8159638	0	0	0	0.0799134	0	0.0827999	0.33284	0.149123	0	0	0	0.0753118	NOTEST	0.018828	0.0199784	0.0855617	0	1	1	no	NOTEST	0.018828	0.141191	2.9067	0	1	1	no	NOTEST	0.0199784	0.141191	2.82114	0	1	1	no
XLOC_000598	Rbsn-5	TSS799	chr2L:8159831-8162452	75.1754	82.3579	42.0257	56.3612	46.8583	49.5323	39.7455	45.3455	53.5058	46.5208	43.876	50.2309	OK	48.5333	63.98	0.398646	0.937089	0.0617	0.311361	no	OK	48.5333	45.3704	-0.0972246	-0.223699	0.65335	0.935722	no	OK	63.98	45.3704	-0.49587	-1.14884	0.02325	0.161761	no
XLOC_000599	Piezo	TSS800	chr2L:8163072-8190137	14.7105	14.4361	18.4651	11.3341	13.4381	9.56431	8.96306	19.0387	9.14132	7.9129	11.0993	9.53691	OK	9.42261	14.7364	0.645189	1.64191	0.00115	0.0172157	yes	OK	9.42261	12.751	0.436415	1.08675	0.0309	0.19729	no	OK	14.7364	12.751	-0.208774	-0.532097	0.2873	0.703279	no
XLOC_000600	CR44116	TSS801	chr2L:8190296-8197049	6.31208	4.37475	4.61913	5.08772	4.42528	3.97291	4.76093	5.37261	4.69311	4.86599	5.66985	5.18104	OK	5.1025	5.09842	-0.00115371	-0.00120457	0.99865	0.999424	no	OK	5.1025	4.63293	-0.139278	-0.155937	0.7539	0.963735	no	OK	5.09842	4.63293	-0.138125	-0.143753	0.773	0.967573	no
XLOC_000601	CG8460	TSS802	chr2L:8197192-8198813	31.6239	26.0156	24.1721	23.2434	24.5869	22.7904	29.4518	19.7317	20.8992	15.8895	15.36	20.8212	OK	18.2425	26.2638	0.52577	1.07088	0.0311	0.197949	no	OK	18.2425	24.1402	0.404135	0.813935	0.0972	0.411075	no	OK	26.2638	24.1402	-0.121635	-0.257077	0.6079	0.920857	no
XLOC_000602	PGAP5	TSS803	chr2L:8198881-8205298	3.78751	6.43925	6.11835	6.83366	5.32389	4.39757	5.6096	4.89486	4.92029	4.39801	5.8713	4.29221	OK	4.87045	5.79469	0.250677	0.205657	0.70365	0.951778	no	OK	4.87045	5.05648	0.0540776	0.0416346	0.94155	0.993315	no	OK	5.79469	5.05648	-0.196599	-0.158508	0.7734	0.967654	no
XLOC_000603	CR44119	TSS804	chr2L:8198881-8205298	9.02768	11.0408	8.34815	9.18409	7.70199	9.96717	7.87888	9.47269	7.58429	7.61673	7.28072	7.68007	OK	7.54045	9.40018	0.318037	0.391778	0.42645	0.825585	no	OK	7.54045	8.75519	0.215487	0.266508	0.59665	0.916157	no	OK	9.40018	8.75519	-0.10255	-0.128169	0.80075	0.973334	no
XLOC_000604	CG8419	TSS805	chr2L:8206170-8211122	0	0	0.196209	0.164436	0	0.223097	0.0457133	0.265489	0.338844	0.0397061	0.343442	0.0772397	NOTEST	0.199808	0.0901614	-1.14803	0	1	1	no	NOTEST	0.199808	0.133575	-0.580964	0	1	1	no	NOTEST	0.0901614	0.133575	0.567068	0	1	1	no
XLOC_000605	Ssb-c31a	TSS806	chr2L:8211346-8211938	59.3775	41.4183	77.4636	50.8326	93.5512	73.5435	74.4004	83.4682	73.836	55.4417	61.6026	56.1293	OK	61.7524	57.273	-0.108639	-0.209335	0.67895	0.94464	no	OK	61.7524	81.2408	0.395711	0.806241	0.10275	0.423472	no	OK	57.273	81.2408	0.50435	1.00521	0.04395	0.248466	no
XLOC_000606	CG8353,CG8360	TSS807,TSS808,TSS809,TSS810	chr2L:8212958-8215239	16.2629	11.6249	16.7388	14.3682	20.4247	12.149	11.0847	20.6875	14.5719	17.5691	15.9703	15.9421	OK	16.0134	14.7487	-0.118689	-0.165755	0.74535	0.962276	no	OK	16.0134	16.0865	0.00657186	0.00928777	0.9839	0.997235	no	OK	14.7487	16.0865	0.125261	0.171347	0.73925	0.960575	no
XLOC_000607	CG8349	TSS811	chr2L:8215914-8218017	0.198767	0.112804	0.314561	0	0.660719	0.226459	0.0458989	0	0	0.10698	0.323444	0.181448	NOTEST	0.152968	0.156533	0.0332372	0	1	1	no	NOTEST	0.152968	0.233269	0.608765	0	1	1	no	NOTEST	0.156533	0.233269	0.575528	0	1	1	no
XLOC_000608	CR43262	TSS812	chr2L:8242054-8242435	0	4.47019	0	0	0	0	0	0	0	0	0	0	OK	0	1.11755	inf	#NAME?	0.09165	0.396209	no	NOTEST	0	0	0	0	1	1	no	OK	1.11755	0	#NAME?	#NAME?	0.09295	0.399956	no
XLOC_000609	CG14277	TSS813	chr2L:8242631-8244003	0	0.50304	0	0	0	0.337791	0	0.203039	0	0	0	0	NOTEST	0	0.12576	inf	0	1	1	no	NOTEST	0	0.135208	inf	0	1	1	no	NOTEST	0.12576	0.135208	0.104503	0	1	1	no
XLOC_000610	CR43752	TSS814	chr2L:8258372-8301079	0	0	0	0	0	0	0	0	0	0	0	0	NOTEST	0	0	0	0	1	1	no	NOTEST	0	0	0	0	1	1	no	NOTEST	0	0	0	0	1	1	no
XLOC_000611	Scgalpha	TSS815	chr2L:8303428-8305376	4.67207	1.72823	1.99111	1.21991	3.68194	2.11843	2.21137	2.44856	0.984615	1.03263	1.36708	1.8966	OK	1.32023	2.40283	0.863944	0.868564	0.0828	0.372698	no	OK	1.32023	2.61508	0.986062	0.995378	0.05	0.271772	no	OK	2.40283	2.61508	0.122117	0.133689	0.79235	0.971072	no
XLOC_000612	CG7840	TSS816	chr2L:8305585-8308192	13.0032	10.1549	6.50972	9.79399	14.3799	13.134	13.5137	9.26427	10.6099	8.84684	6.45717	10.0609	OK	8.9937	9.86546	0.133471	0.108826	0.8258	0.977342	no	OK	8.9937	12.573	0.483337	0.411883	0.40875	0.813309	no	OK	9.86546	12.573	0.349866	0.309149	0.5351	0.889854	no
XLOC_000613	CG7818	TSS817	chr2L:8308426-8311195	10.1286	17.2366	11.8213	13.2726	14.6904	15.7299	14.6885	12.3698	13.8414	16.1442	11.2912	13.0947	OK	13.5929	13.1148	-0.0516587	-0.0771996	0.8776	0.98534	no	OK	13.5929	14.3696	0.0801732	0.128549	0.7968	0.972174	no	OK	13.1148	14.3696	0.131832	0.198513	0.6892	0.947524	no
XLOC_000614	CG7806	TSS818	chr2L:8311398-8319908	56.4901	65.5373	40.8773	51.3046	45.4892	50.7791	46.7634	53.0178	46.4321	46.7368	42.4816	53.6307	OK	47.3203	53.5523	0.17849	0.485447	0.32605	0.742731	no	OK	47.3203	49.0123	0.0506861	0.13784	0.78075	0.969266	no	OK	53.5523	49.0123	-0.127804	-0.346537	0.4832	0.860007	no
XLOC_000615	CG7787	TSS819	chr2L:8320327-8325409	18.0414	23.3365	25.551	20.8306	32.1701	30.0693	30.8958	25.5231	30.6482	38.9579	33.477	33.9461	OK	34.2573	21.9399	-0.642858	-0.878231	0.07495	0.348658	no	OK	34.2573	29.6646	-0.207671	-0.335846	0.4943	0.86789	no	OK	21.9399	29.6646	0.435187	0.56901	0.2374	0.651746	no
XLOC_000616	CG14275	TSS820,TSS821	chr2L:8327455-8332911	0	0.629831	0	0.122714	0	0.316366	0.102421	0.0765554	0	0.119475	0	0.028954	NOTEST	0.0371072	0.188136	2.34201	0	1	1	no	NOTEST	0.0371072	0.123835	1.73866	0	1	1	no	NOTEST	0.188136	0.123835	-0.603352	0	1	1	no
XLOC_000617	CG14274	TSS822	chr2L:8338286-8342056	0	0.297833	0	0.14578	0.386337	0.208572	0.267543	0.182113	0	0	0.0214702	0.178263	NOTEST	0.0499332	0.110903	1.15123	0	1	1	no	NOTEST	0.0499332	0.261141	2.38676	0	1	1	no	NOTEST	0.110903	0.261141	1.23553	0	1	1	no
XLOC_000618	CG14273	TSS823	chr2L:8342694-8345015	0	0	0	0	0.187266	0.09628	0.15645	0	0	0.136574	0	0	NOTEST	0.0341435	0	#NAME?	0	1	1	no	NOTEST	0.0341435	0.109999	1.68781	0	1	1	no	NOTEST	0	0.109999	inf	0	1	1	no
XLOC_000619	CG7778	TSS824	chr2L:8346619-8351112	0	0.802231	0.149575	0.313657	11.4099	11.8519	4.61255	4.08817	1.53963	0.608492	1.38157	1.10736	OK	1.15926	0.316366	-1.87354	-1.1578	0.3172	0.733555	no	OK	1.15926	7.99064	2.7851	2.59859	5e-05	0.00129868	yes	OK	0.316366	7.99064	4.65865	3.33441	0.18615	0.579716	no
XLOC_000620	Mur29B	TSS825	chr2L:8352186-8355172	5.11237	3.7493	11.2621	1.0529	52.1364	45.9334	33.1293	68.4701	19.1991	17.367	8.27898	22.2754	OK	16.7801	5.29417	-1.66428	-2.73437	5e-05	0.00129868	yes	OK	16.7801	49.9173	1.57279	3.51959	5e-05	0.00129868	yes	OK	5.29417	49.9173	3.23706	5.60944	5e-05	0.00129868	yes
XLOC_000621	CSN8	TSS826	chr2L:8364854-8365663	12.1193	20.6485	27.1922	25.1309	32.7966	27.0241	34.9976	24.2601	26.4735	23.9755	27.1995	23.7109	OK	25.3399	21.2727	-0.252403	-0.399888	0.4112	0.81463	no	OK	25.3399	29.7696	0.232432	0.389087	0.431	0.828313	no	OK	21.2727	29.7696	0.484835	0.783617	0.10475	0.427712	no
XLOC_000622	Pp2A-29B	TSS827	chr2L:8366037-8370090	139.936	145.436	137.828	146.699	151.875	149.834	155.526	154.045	111.916	129.859	142.705	126.214	OK	127.674	142.475	0.158247	0.437185	0.3827	0.791729	no	OK	127.674	152.82	0.259374	0.71314	0.16135	0.540407	no	OK	142.475	152.82	0.101127	0.27876	0.5848	0.912093	no
XLOC_000623	CG17292	TSS828,TSS829	chr2L:8370342-8374250	44.536	30.6995	16.1935	23.4505	35.4294	32.4264	20.2857	27.1	27.7107	30.3181	32.4734	29.9641	OK	30.1166	28.7199	-0.0685074	-0.148414	0.76865	0.967207	no	OK	30.1166	28.8104	-0.0639695	-0.140433	0.77535	0.968019	no	OK	28.7199	28.8104	0.00453789	0.00965514	0.9835	0.997235	no
XLOC_000624	Wdr82	TSS830	chr2L:8374460-8376797	30.1919	20.6688	32.7704	26.2751	28.0183	28.1416	29.2833	27.4403	33.7976	35.7983	30.396	26.1396	OK	31.5329	27.4766	-0.198654	-0.376909	0.4461	0.837348	no	OK	31.5329	28.2209	-0.160094	-0.306066	0.53995	0.891923	no	OK	27.4766	28.2209	0.0385607	0.072712	0.8871	0.98629	no
XLOC_000625	CG17294	TSS831	chr2L:8377034-8378206	1.96928	5.38417	4.15904	3.71782	2.24625	3.56649	3.72292	4.60989	2.88502	0.963344	3.57248	2.59216	OK	2.50325	3.80758	0.60507	0.608983	0.1969	0.596325	no	OK	2.50325	3.53639	0.498474	0.497784	0.2815	0.698031	no	OK	3.80758	3.53639	-0.106597	-0.11401	0.8103	0.97483	no
XLOC_000626	Rcd4	TSS832	chr2L:8382860-8384137	3.23557	6.67381	12.3204	8.18521	15.6003	12.0744	11.5817	10.0615	15.8187	8.48951	9.76807	11.603	OK	11.4198	7.60374	-0.586759	-0.363558	0.47355	0.854629	no	OK	11.4198	12.3295	0.110571	0.0886195	0.86805	0.984571	no	OK	7.60374	12.3295	0.69733	0.426467	0.41645	0.818966	no
XLOC_000627	CG13384	TSS833,TSS834	chr2L:8384454-8389331	27.0249	39.0856	19.5958	26.6512	24.9033	26.3009	26.3562	22.8292	23.3077	20.0881	17.7158	23.4253	OK	21.1342	28.0894	0.410443	0.973559	0.0525	0.280722	no	OK	21.1342	25.0974	0.247957	0.589151	0.24525	0.659817	no	OK	28.0894	25.0974	-0.162486	-0.388836	0.4417	0.835042	no
XLOC_000628	snRNA:U6atac:29B	TSS835	chr2L:8389723-8389820	0	0	42.0356	46.7715	0	0	0	0	0	0	0	0	NOTEST	0	22.2018	inf	0	1	1	no	NOTEST	0	0	0	0	1	1	no	NOTEST	22.2018	0	#NAME?	0	1	1	no
XLOC_000629	CR45343	TSS836	chr2L:8394428-8395332	0	0	0	0	0	0	0	0	0	0	0	0	NOTEST	0	0	0	0	1	1	no	NOTEST	0	0	0	0	1	1	no	NOTEST	0	0	0	0	1	1	no
XLOC_000630	CG13385	TSS837	chr2L:8396648-8397886	0	0	0	0	0	0	0.0653632	0.0489148	0	0	0.0864769	0.0184376	NOTEST	0.0262286	0	#NAME?	0	1	1	no	NOTEST	0.0262286	0.0285695	0.123333	0	1	1	no	NOTEST	0	0.0285695	inf	0	1	1	no
XLOC_000631	CG13386	TSS838	chr2L:8399020-8400078	0	0.420282	0.684132	0.205028	1.29858	0.263539	0.769931	2.01532	0.0745799	0.448377	0.376895	0.917717	NOTEST	0.454392	0.32736	-0.473059	0	1	1	no	OK	0.454392	1.08684	1.25813	0.728611	0.15295	0.524361	no	OK	0.32736	1.08684	1.73119	1.05512	0.05375	0.285116	no
XLOC_000632	CG31898	TSS839	chr2L:8400420-8403280	2.25817	2.90402	3.70086	2.08637	1.27624	1.24102	2.68084	1.74543	2.6105	1.49824	2.76317	1.6109	OK	2.1207	2.73736	0.368241	0.294796	0.54715	0.895891	no	OK	2.1207	1.73588	-0.288872	-0.207636	0.6787	0.944591	no	OK	2.73736	1.73588	-0.657113	-0.528322	0.28625	0.702386	no
XLOC_000633	emb	TSS840	chr2L:8403446-8408853	34.5819	45.2465	50.447	50.9016	54.139	60.4619	60.3553	51.1881	48.5601	52.7617	52.3369	58.0831	OK	52.9354	45.2942	-0.224906	-0.608822	0.22805	0.640702	no	OK	52.9354	56.5361	0.0949375	0.258653	0.60155	0.917862	no	OK	45.2942	56.5361	0.319843	0.866366	0.0847	0.377569	no
XLOC_000634	Akap200	TSS841,TSS842,TSS843	chr2L:8415689-8433598	81.9366	73.7765	40.7652	47.6126	88.7968	100.142	92.6234	79.4591	84.6443	79.2799	62.3643	77.95	OK	76.0596	61.0227	-0.317784	-0.793377	0.1099	0.43983	no	OK	76.0596	90.2552	0.246879	0.638066	0.2017	0.603708	no	OK	61.0227	90.2552	0.564663	1.43301	0.0038	0.0432303	yes
XLOC_000635	Chrac-14	TSS844	chr2L:8437404-8437996	9.6022	9.29281	10.7116	8.61132	29.3559	23.5532	21.8195	12.9852	18.9441	13.0371	13.7005	14.8102	OK	15.123	9.55449	-0.662491	-0.8134	0.0959	0.407867	no	OK	15.123	21.9285	0.536063	0.739576	0.14385	0.509392	no	OK	9.55449	21.9285	1.19855	1.56203	0.0022	0.0284163	yes
XLOC_000636	mus201	TSS845,TSS846	chr2L:8438168-8442342	4.77431	4.85389	4.34015	4.04283	3.65423	3.57548	3.53375	3.7723	5.09751	4.56686	3.64768	4.22209	OK	4.38353	4.50279	0.0387261	0.0697792	0.8905	0.986298	no	OK	4.38353	3.63394	-0.27056	-0.468691	0.34775	0.76279	no	OK	4.50279	3.63394	-0.309286	-0.546029	0.2747	0.689714	no
XLOC_000637	CG31897	TSS847	chr2L:8442446-8445815	1.22915	0	0.313872	0.618145	0.381675	0.46833	0.361967	0.312359	0.114783	0.241338	0.319949	0.358298	OK	0.258592	0.540291	1.06306	0.809127	0.1041	0.426274	no	NOTEST	0.258592	0.381083	0.559428	0	1	1	no	OK	0.540291	0.381083	-0.503632	-0.42113	0.3717	0.782983	no
XLOC_000638	fu2	TSS848	chr2L:8464487-8466694	3.33181	6.42453	6.3814	6.61852	6.24619	6.77583	7.1805	6.69392	6.46312	13.6865	8.30225	6.92926	OK	8.84528	5.68906	-0.636716	-1.03645	0.03955	0.231454	no	OK	8.84528	6.72411	-0.395564	-0.66899	0.1761	0.563942	no	OK	5.68906	6.72411	0.241152	0.379495	0.4489	0.839137	no
XLOC_000639	d	TSS849,TSS850	chr2L:8466816-8488671	0.24584	0.104524	0.220528	0.128323	0.0901611	0.156449	0.0856101	0.164876	0.0373112	0.239419	0.138785	0.104435	NOTEST	0.129988	0.174804	0.427364	0	1	1	no	NOTEST	0.129988	0.124274	-0.0648467	0	1	1	no	NOTEST	0.174804	0.124274	-0.49221	0	1	1	no
XLOC_000640	CheA29a	TSS851	chr2L:8466816-8488671	0	0	0	0	0	0	0.0670756	0	0	0	0	0.0379444	NOTEST	0.00948611	0	#NAME?	0	1	1	no	NOTEST	0.00948611	0.0167689	0.821899	0	1	1	no	NOTEST	0	0.0167689	inf	0	1	1	no
XLOC_000641	CG43796	TSS852	chr2L:8466816-8488671	0	0	0	0	0	0	0	0	0	0	0	0	NOTEST	0	0	0	0	1	1	no	NOTEST	0	0	0	0	1	1	no	NOTEST	0	0	0	0	1	1	no
XLOC_000642	unsRNA:d-a	TSS853	chr2L:8466816-8488671	0	0	1.53833	0	0	0	1.36942	0	1.30177	0	0	1.23255	NOTEST	0.63358	0.384581	-0.720238	0	1	1	no	NOTEST	0.63358	0.342354	-0.888037	0	1	1	no	NOTEST	0.384581	0.342354	-0.167799	0	1	1	no
XLOC_000643	CG13088	TSS854	chr2L:8488980-8490546	1.88124	0.600256	2.55233	0.913585	0.519323	0.767663	1.361	1.12075	2.65816	1.16973	1.10499	1.18194	OK	1.5287	1.48685	-0.0400444	-0.0333987	0.9483	0.993315	no	OK	1.5287	0.942185	-0.698225	-0.573594	0.2319	0.645213	no	OK	1.48685	0.942185	-0.65818	-0.546726	0.25515	0.668114	no
XLOC_000644	CG43400	TSS855	chr2L:8490738-8491360	0	0	0.298771	0	0	0.327763	0	0.195541	0	0	0	0.198095	NOTEST	0.0495237	0.0746927	0.592849	0	1	1	no	NOTEST	0.0495237	0.130826	1.40146	0	1	1	no	NOTEST	0.0746927	0.130826	0.80861	0	1	1	no
XLOC_000645	PIG-U	TSS856	chr2L:8515095-8517380	23.5469	30.5109	23.4086	24.6658	32.668	29.7816	30.1979	21.1269	21.7631	32.1524	21.2734	26.3714	OK	25.3901	25.5331	0.00810078	0.0155316	0.97535	0.996746	no	OK	25.3901	28.4436	0.163839	0.316349	0.5306	0.886853	no	OK	25.5331	28.4436	0.155738	0.306277	0.54155	0.892317	no
XLOC_000646	CG13090	TSS857,TSS858	chr2L:8517410-8519176	10.3604	15.5668	10.6533	11.1054	14.3182	11.0074	11.5451	8.34153	8.81229	10.5294	9.52667	11.4548	OK	10.0808	11.9215	0.241951	0.414883	0.4075	0.812304	no	OK	10.0808	11.3031	0.165102	0.285863	0.56815	0.905007	no	OK	11.9215	11.3031	-0.0768484	-0.135242	0.785	0.96961	no
XLOC_000647	CG13091	TSS859	chr2L:8519689-8521809	0	0.166019	0.0775558	0.216765	0.394716	0.110696	0.0678046	0.203109	0	0	0.0997754	0.127412	NOTEST	0.0567968	0.115085	1.01882	0	1	1	no	NOTEST	0.0567968	0.194081	1.77278	0	1	1	no	NOTEST	0.115085	0.194081	0.753961	0	1	1	no
XLOC_000648	Acer	TSS860	chr2L:8521932-8528618	1.80933	2.52564	1.51406	0.657776	1.55886	0.709745	0.709996	1.53576	1.0129	0.692305	0.755542	0.908963	OK	0.842429	1.6267	0.949324	0.458383	0.4895	0.864767	no	OK	0.842429	1.12859	0.421896	0.197433	0.7879	0.970399	no	OK	1.6267	1.12859	-0.527428	-0.269964	0.6513	0.935031	no
XLOC_000649	CG17834	TSS861,TSS862	chr2L:8529140-8541439	13.4558	21.0014	13.3873	15.1244	7.48654	7.4402	7.16104	9.73097	7.90847	7.08642	8.24777	10.2797	OK	8.38059	15.7422	0.909515	1.51521	0.0051	0.054166	no	OK	8.38059	7.95469	-0.0752474	-0.114971	0.82855	0.977497	no	OK	15.7422	7.95469	-0.984762	-1.62288	0.0026	0.032119	yes
XLOC_000650	Sema-1a	TSS863,TSS864	chr2L:8542146-8672041	8.63525	8.53641	5.83282	4.76417	7.42194	6.51865	5.65412	7.57002	5.28018	3.83114	3.52929	5.56487	OK	4.55137	6.94216	0.609083	1.36093	0.0063	0.0632941	no	OK	4.55137	6.79118	0.577361	1.30359	0.00865	0.0792285	no	OK	6.94216	6.79118	-0.0317223	-0.0737923	0.8854	0.986119	no
XLOC_000651	Glt	TSS865,TSS866	chr2L:8672697-8679812	0	0.110996	0.389883	0.231444	0.17961	0.180088	0.193024	0.502022	0.0990127	0.223542	0.240862	0.313354	NOTEST	0.219193	0.183081	-0.25972	0	1	1	no	NOTEST	0.219193	0.263686	0.266621	0	1	1	no	NOTEST	0.183081	0.263686	0.526341	0	1	1	no
XLOC_000652	Trs23	TSS867	chr2L:8686230-8687052	24.7822	31.7266	20.6931	24.7919	25.1823	23.2452	22.6769	21.9075	26.4234	25.5338	18.0531	20.4316	OK	22.6105	25.4984	0.173418	0.298712	0.52965	0.886093	no	OK	22.6105	23.253	0.0404249	0.0687925	0.8844	0.985716	no	OK	25.4984	23.253	-0.132993	-0.230295	0.6346	0.93035	no
XLOC_000653	CR44992	TSS868	chr2L:8687225-8709611	0.259023	0.342748	0.663755	0.359776	0.539502	0.709808	0.760273	1.1538	0.558253	1.20673	0.777413	0.710374	OK	0.813191	0.406325	-1.00096	-0.339902	0.65225	0.935291	no	OK	0.813191	0.790845	-0.0401992	-0.0151783	0.9639	0.994712	no	OK	0.406325	0.790845	0.96076	0.326431	0.67025	0.941923	no
XLOC_000654	CG9314	TSS869	chr2L:8687225-8709611	0.830958	1.09406	0.660659	0.616492	1.09614	0.696087	0.748691	1.0738	2.31316	1.63813	1.34286	1.76202	OK	1.76404	0.800542	-1.13983	-0.467555	0.5426	0.892988	no	OK	1.76404	0.903679	-0.965002	-0.397283	0.63155	0.929019	no	OK	0.800542	0.903679	0.174832	0.0698169	0.925	0.990915	no
XLOC_000655	CG12438	TSS870	chr2L:8752284-8753209	0	0	0	0	0	0	0	0	0	0	0	0	NOTEST	0	0	0	0	1	1	no	NOTEST	0	0	0	0	1	1	no	NOTEST	0	0	0	0	1	1	no
XLOC_000656	SoxN	TSS871	chr2L:8825644-8829670	0	0.0889658	0	0	0	0.0110995	0.00910394	0.0818799	0	0.0526951	0.0724375	0.0153797	NOTEST	0.0351281	0.0222414	-0.659373	0	1	1	no	NOTEST	0.0351281	0.0255208	-0.460948	0	1	1	no	NOTEST	0.0222414	0.0255208	0.198425	0	1	1	no
XLOC_000657	CG32986,CG32987,CG32988	TSS872,TSS873,TSS874	chr2L:8862609-8867686	0	0.389032	0	0	0	0	0	0	0	0	0	0	NOTEST	0	0.0972579	inf	0	1	1	no	NOTEST	0	0	0	0	1	1	no	NOTEST	0.0972579	0	#NAME?	0	1	1	no
XLOC_000658	CG32983,CG9483	TSS875,TSS876	chr2L:8862609-8867686	0	0	0	0	0	0	0	0	0	0	0	0	NOTEST	0	0	0	0	1	1	no	NOTEST	0	0	0	0	1	1	no	NOTEST	0	0	0	0	1	1	no
XLOC_000659	CR44414	TSS877	chr2L:8867874-8868747	0	0	0	0	0	0	0	0	0	0	0	0	NOTEST	0	0	0	0	1	1	no	NOTEST	0	0	0	0	1	1	no	NOTEST	0	0	0	0	1	1	no
XLOC_000660	CG42713	TSS878	chr2L:8891439-8892177	0	0	0	0	0	0	0	0.103106	0	0	0	0	NOTEST	0	0	0	0	1	1	no	NOTEST	0	0.0257766	inf	0	1	1	no	NOTEST	0	0.0257766	inf	0	1	1	no
XLOC_000661	CG34398	TSS879	chr2L:8898785-8933594	0.765632	0.0824307	0.1532	0.137448	0.0639699	0.176082	0.164906	0.144629	0.0516566	0.164971	0.147084	0.175256	NOTEST	0.134742	0.284678	1.07913	0	1	1	no	NOTEST	0.134742	0.137397	0.0281505	0	1	1	no	NOTEST	0.284678	0.137397	-1.05098	0	1	1	no
XLOC_000662	Tsp29Fa	TSS880,TSS881	chr2L:8933961-8936096	702.868	681.888	441.303	479.678	353.191	373.901	333.016	441.386	411.164	440.6	416.03	468.772	OK	434.141	576.434	0.408991	1.12344	0.02415	0.166165	no	OK	434.141	375.374	-0.209837	-0.576388	0.24455	0.658862	no	OK	576.434	375.374	-0.618828	-1.69233	0.00095	0.0147702	yes
XLOC_000663	Tsp29Fb	TSS882	chr2L:8937389-8943257	219.196	173.338	201.019	99.823	162.117	116.324	98.9614	206.672	105.748	84.8507	105.828	116.406	OK	103.208	173.344	0.748083	1.78327	0.00045	0.00814181	yes	OK	103.208	146.019	0.500595	1.18537	0.01815	0.135077	no	OK	173.344	146.019	-0.247487	-0.601899	0.23245	0.645551	no
XLOC_000664	CG32985	TSS883	chr2L:8962532-8964620	0.252947	0.239091	0.0223543	0.210832	0.123962	0.262919	0.117241	0.175624	0	0.022663	0.0690285	0.0991112	NOTEST	0.0477007	0.181306	1.92635	0	1	1	no	NOTEST	0.0477007	0.169936	1.83291	0	1	1	no	NOTEST	0.181306	0.169936	-0.0934336	0	1	1	no
XLOC_000665	CG32984	TSS884	chr2L:8964981-8967035	0	0.922422	0.136166	0.285387	0.251723	0.0728035	0.0595128	0.20801	0.138383	0.32213	0.0700774	0.0670816	NOTEST	0.149418	0.335994	1.16908	0	1	1	no	NOTEST	0.149418	0.148012	-0.0136387	0	1	1	no	NOTEST	0.335994	0.148012	-1.18272	0	1	1	no
XLOC_000666	CG18088	TSS885	chr2L:8967534-8975428	24.8323	32.7436	5.62338	7.0349	5.24489	4.41078	2.24266	1.91727	8.18205	8.5605	1.99589	3.61282	OK	5.58782	17.5585	1.65182	2.21104	0.0004	0.00737706	yes	OK	5.58782	3.4539	-0.694058	-0.699201	0.18215	0.57331	no	OK	17.5585	3.4539	-2.34587	-2.6026	0.00025	0.00508582	yes
XLOC_000667	CG18662	TSS886	chr2L:8977833-8984872	1.89364	0	0.993702	0.0869648	0	0	0.145226	0	0	0.680282	0	0.452037	OK	0.28308	0.743576	1.39327	0.34213	0.65275	0.935352	no	NOTEST	0.28308	0.0363065	-2.96291	0	1	1	no	OK	0.743576	0.0363065	-4.35618	-0.529125	0.30825	0.723967	no
XLOC_000668	CG9555	TSS887,TSS888	chr2L:8991734-8993632	4.75687	5.32524	7.63684	3.10601	3.36296	3.37461	3.8879	7.06194	3.38739	2.90125	5.7067	2.74045	OK	3.68395	5.20624	0.49899	0.600524	0.2285	0.641211	no	OK	3.68395	4.42185	0.263399	0.311145	0.53545	0.890013	no	OK	5.20624	4.42185	-0.235591	-0.299489	0.5518	0.897997	no
XLOC_000669	CG17906	TSS889	chr2L:8993817-8997379	0	0.106855	1.29088	1.04159	0.486329	0.428528	0.869276	1.10505	1.81865	0.759391	1.07218	1.03066	OK	1.17022	0.609832	-0.940298	-0.242592	0.68455	0.946267	no	OK	1.17022	0.722296	-0.69612	-0.184081	0.6939	0.948813	no	OK	0.609832	0.722296	0.244178	0.0560971	0.8993	0.987026	no
XLOC_000670	CG18661,Try29F	TSS890,TSS891	chr2L:8997604-8999816	7.59217	17.8682	12.7483	12.1318	16.5691	14.4787	14.7229	12.6347	11.1637	6.53622	11.1308	10.5335	OK	9.84104	12.5851	0.354836	0.475329	0.34725	0.762394	no	OK	9.84104	14.6013	0.569218	0.792808	0.11295	0.446975	no	OK	12.5851	14.6013	0.214383	0.311314	0.54325	0.893369	no
XLOC_000671	CG9568	TSS892	chr2L:9010582-9011358	19.6495	49.1366	108.345	66.6288	481.289	500.212	522.94	418.632	132.181	171.81	93.6496	236.865	OK	158.626	60.9399	-1.38017	-2.97802	5e-05	0.00129868	yes	OK	158.626	480.768	1.59971	4.09992	5e-05	0.00129868	yes	OK	60.9399	480.768	2.97988	6.7355	5e-05	0.00129868	yes
XLOC_000672	CG13102	TSS893	chr2L:9012187-9014149	14.781	10.2862	52.6167	2.03254	4.39933	3.07415	3.31014	9.36895	1.77516	2.39085	4.17287	2.25953	OK	2.6496	19.9291	2.91103	2.72068	5e-05	0.00129868	yes	OK	2.6496	5.03814	0.927116	0.755532	0.12725	0.478743	no	OK	19.9291	5.03814	-1.98391	-2.02532	0.0005	0.00885065	yes
XLOC_000673	CR44483	TSS894	chr2L:9051630-9071607	0	0	0	0.101627	0	0	0	0	0	0	0	0	NOTEST	0	0.0254067	inf	0	1	1	no	NOTEST	0	0	0	0	1	1	no	NOTEST	0.0254067	0	#NAME?	0	1	1	no
XLOC_000674	CG12439	TSS895	chr2L:9077120-9077988	0	0	0	0	0	0	0	0	0	0	0	0	NOTEST	0	0	0	0	1	1	no	NOTEST	0	0	0	0	1	1	no	NOTEST	0	0	0	0	1	1	no
XLOC_000675	Toll-4	TSS896	chr2L:9084106-9089440	0	0	0	0	0	0	0	0	0	0	0	0	NOTEST	0	0	0	0	1	1	no	NOTEST	0	0	0	0	1	1	no	NOTEST	0	0	0	0	1	1	no
XLOC_000676	CG31609	TSS897	chr2L:9097562-9098175	0	0	0	0	0	0	0	0	0	0	0	0	NOTEST	0	0	0	0	1	1	no	NOTEST	0	0	0	0	1	1	no	NOTEST	0	0	0	0	1	1	no
XLOC_000677	CR44482	TSS898	chr2L:9099396-9099770	0	0	0	0	0	0	0	0	0	0	0	0	NOTEST	0	0	0	0	1	1	no	NOTEST	0	0	0	0	1	1	no	NOTEST	0	0	0	0	1	1	no
XLOC_000678	Or30a	TSS899	chr2L:9111813-9113285	0	0	0	0	0	0	0	0	0	0	0	0	NOTEST	0	0	0	0	1	1	no	NOTEST	0	0	0	0	1	1	no	NOTEST	0	0	0	0	1	1	no
XLOC_000679	CR44617	TSS900	chr2L:9119581-9120040	0	0	0	0	0	0	0	0	0	0	0	0	NOTEST	0	0	0	0	1	1	no	NOTEST	0	0	0	0	1	1	no	NOTEST	0	0	0	0	1	1	no
XLOC_000680	CR44615	TSS901	chr2L:9124031-9124500	0	0	0	0	0	0	0	0	0	0	0	0	NOTEST	0	0	0	0	1	1	no	NOTEST	0	0	0	0	1	1	no	NOTEST	0	0	0	0	1	1	no
XLOC_000681	CG32982	TSS902,TSS903	chr2L:9125736-9163721	35.8103	38.3562	33.4604	51.786	58.9155	67.989	58.7785	43.0116	64.9442	48.3989	59.9478	70.7548	OK	61.0114	39.8532	-0.614383	-1.56532	0.0019	0.0252947	yes	OK	61.0114	57.1737	-0.0937287	-0.243103	0.63195	0.929156	no	OK	39.8532	57.1737	0.520655	1.32192	0.0081	0.0752992	no
XLOC_000682	CG13108	TSS904	chr2L:9164234-9166514	0	0.904658	0.280609	1.37347	0.326832	0.40328	0.654922	0.949089	0.785077	0.571909	0.829694	1.01673	OK	0.800853	0.639683	-0.32418	-0.106174	0.8871	0.98629	no	OK	0.800853	0.583531	-0.456728	-0.141984	0.82825	0.977497	no	OK	0.639683	0.583531	-0.132548	-0.0399593	0.9452	0.993315	no
XLOC_000683	tai	TSS905,TSS906	chr2L:9166777-9251042	69.0073	88.1047	59.7538	70.4655	44.0953	48.1775	44.2816	52.4691	48.0263	55.2229	61.7956	66.5	OK	57.8862	71.8328	0.311424	0.861377	0.08345	0.374435	no	OK	57.8862	47.2559	-0.292725	-0.805898	0.10245	0.423027	no	OK	71.8328	47.2559	-0.604149	-1.67431	0.0012	0.0178244	yes
XLOC_000684	Ggamma30A	TSS907,TSS908,TSS909	chr2L:9256562-9302494	1.1459	3.02132	0.734566	0.92063	4.01979	2.42248	3.81746	9.09026	2.94304	0.812659	2.11877	2.78373	OK	2.16455	1.4556	-0.572451	-0.343136	0.48285	0.859758	no	OK	2.16455	4.8375	1.16019	0.976682	0.05455	0.288025	no	OK	1.4556	4.8375	1.73264	1.06303	0.05025	0.272613	no
XLOC_000685	CR45456	TSS910	chr2L:9325844-9326721	0	0	0	0	0	0	0	0	0	0	0	0	NOTEST	0	0	0	0	1	1	no	NOTEST	0	0	0	0	1	1	no	NOTEST	0	0	0	0	1	1	no
XLOC_000686	CR45457	TSS911	chr2L:9327038-9327553	0	0	0	0	1.78168	0	0	0	0	0	0	0	NOTEST	0	0	0	0	1	1	no	NOTEST	0	0.445421	inf	0	1	1	no	NOTEST	0	0.445421	inf	0	1	1	no
XLOC_000687	CG17005	TSS912	chr2L:9327743-9330332	0	0	0	0	0	0.0212849	0	0	0	0	0	0.0117373	NOTEST	0.00293433	0	#NAME?	0	1	1	no	NOTEST	0.00293433	0.00532123	0.858727	0	1	1	no	NOTEST	0	0.00532123	inf	0	1	1	no
XLOC_000688	Cks30A	TSS913	chr2L:9330762-9331981	1.08068	1.22628	3.10091	2.86661	17.4722	15.7571	24.2398	6.8646	6.47388	3.3221	7.08253	8.40041	OK	6.31973	2.06862	-1.61119	-1.5981	0.0047	0.0508613	no	OK	6.31973	16.0834	1.34764	1.99383	0.0003	0.00585337	yes	OK	2.06862	16.0834	2.95883	3.13123	5e-05	0.00129868	yes
XLOC_000689	Eaat1	TSS914,TSS915	chr2L:9333566-9341925	0.457122	0	2.24827	0.285918	0.614959	0.780492	0.693516	0.86409	0.861044	0.184246	1.94426	0.582316	OK	0.892967	0.747827	-0.255901	-0.19918	0.72355	0.957563	no	OK	0.892967	0.738264	-0.27447	-0.256784	0.6035	0.918932	no	OK	0.747827	0.738264	-0.0185685	-0.0146265	0.9777	0.996794	no
XLOC_000690	CG3748	TSS916	chr2L:9342831-9344777	0	0	0	0	0	0	0	0	0	0	0	0	NOTEST	0	0	0	0	1	1	no	NOTEST	0	0	0	0	1	1	no	NOTEST	0	0	0	0	1	1	no
XLOC_000691	CG43350	TSS917	chr2L:9349545-9349963	0	0	0	0	0	0	0	0	0	0	0	0	NOTEST	0	0	0	0	1	1	no	NOTEST	0	0	0	0	1	1	no	NOTEST	0	0	0	0	1	1	no
XLOC_000692	CG13110	TSS918	chr2L:9350469-9350996	0	0	0	0	0	0	0	0	0	0	0	0	NOTEST	0	0	0	0	1	1	no	NOTEST	0	0	0	0	1	1	no	NOTEST	0	0	0	0	1	1	no
XLOC_000693	CR43404	TSS919	chr2L:9364296-9364991	0	0	0	0	0	0	0	0	0	0	0	0	NOTEST	0	0	0	0	1	1	no	NOTEST	0	0	0	0	1	1	no	NOTEST	0	0	0	0	1	1	no
XLOC_000694	CG34181	TSS920	chr2L:9367639-9368434	0	0	0	0	0	0	0	0	0	0	0	0	NOTEST	0	0	0	0	1	1	no	NOTEST	0	0	0	0	1	1	no	NOTEST	0	0	0	0	1	1	no
XLOC_000695	CR43865	TSS921	chr2L:9370308-9415156	0	0	0	0	0	0	0	0	0	0	0	0	NOTEST	0	0	0	0	1	1	no	NOTEST	0	0	0	0	1	1	no	NOTEST	0	0	0	0	1	1	no
XLOC_000696	Aldh	TSS922,TSS923	chr2L:9370308-9415156	119.294	128.726	157.193	200.322	156.919	122.584	148.094	154.097	159.697	140.399	141.219	142.571	OK	145.972	151.383	0.0525207	0.143229	0.7752	0.96798	no	OK	145.972	145.424	-0.00542672	-0.0147917	0.9765	0.996783	no	OK	151.383	145.424	-0.0579474	-0.156625	0.7513	0.963073	no
XLOC_000697	Mco1	TSS924	chr2L:9416587-9426342	0	0	1.70375	0.0268173	0.0176793	0.0272857	0.0783233	0.0419155	0	0.0907059	0.0692265	0.037799	NOTEST	0.0494329	0.432642	3.12963	0	1	1	no	NOTEST	0.0494329	0.0413009	-0.259296	0	1	1	no	NOTEST	0.432642	0.0413009	-3.38893	0	1	1	no
XLOC_000698	CG42847,Fbp2	TSS925,TSS926	chr2L:9426783-9431052	0	0	0	0.178214	0	0.0474458	0.053671	0.0741117	0	0.346954	0.218313	0.0886698	NOTEST	0.163484	0.0445536	-1.87554	0	1	1	no	NOTEST	0.163484	0.0438071	-1.89992	0	1	1	no	NOTEST	0.0445536	0.0438071	-0.0243768	0	1	1	no
XLOC_000699	scat	TSS927	chr2L:9431404-9435341	9.95484	15.9714	11.1572	12.3334	11.4334	13.6319	12.2229	11.9781	12.8811	14.5606	12.5535	12.8746	OK	13.2174	12.3542	-0.0974427	-0.221472	0.65885	0.937662	no	OK	13.2174	12.3166	-0.10184	-0.233341	0.6405	0.932457	no	OK	12.3542	12.3166	-0.00439723	-0.0099639	0.98405	0.997235	no
XLOC_000700	CG3769,RpS28-like	TSS928,TSS929	chr2L:9435398-9437227	0	0.368085	0.206009	0.107987	0	0.776145	0.262505	1.03788	0.457936	2.06335	0.132474	0.1533	OK	0.701764	0.17052	-2.04104	-0.891816	0.22825	0.640887	no	OK	0.701764	0.519132	-0.434885	-0.205039	0.76755	0.966906	no	OK	0.17052	0.519132	1.60616	0.652487	0.4283	0.826428	no
XLOC_000701	numb	TSS930,TSS931	chr2L:9437468-9464184	40.8565	46.906	46.1408	31.2108	39.2281	36.1816	33.5402	50.1088	40.8508	36.1201	49.6975	37.7283	OK	41.0992	41.2785	0.00628176	0.0161821	0.9742	0.996334	no	OK	41.0992	39.7647	-0.0476214	-0.123127	0.809	0.974596	no	OK	41.2785	39.7647	-0.0539032	-0.138964	0.78465	0.96961	no
XLOC_000702	CR43769	TSS932	chr2L:9470325-9470861	0	0	0.133146	0	0	0	0	0.261393	1.42785	0	0	0.332414	NOTEST	0.440066	0.0332865	-3.72471	0	1	1	no	NOTEST	0.440066	0.0653482	-2.7515	0	1	1	no	NOTEST	0.0332865	0.0653482	0.973209	0	1	1	no
XLOC_000703	CG33298	TSS933	chr2L:9495473-9520696	13.7891	17.1724	18.8213	23.1052	23.6666	21.5626	32.2808	21.0308	20.6494	19.9084	25.7681	25.2006	OK	22.8816	18.222	-0.328508	-0.844732	0.0919	0.39717	no	OK	22.8816	24.6352	0.106533	0.279034	0.57965	0.910161	no	OK	18.222	24.6352	0.435041	1.11665	0.0273	0.180798	no
XLOC_000704	Oatp30B	TSS934,TSS935	chr2L:9521209-9540060	24.7566	28.54	27.8868	25.8766	20.9592	24.4366	28.2114	27.6402	34.1731	35.1437	43.156	29.433	OK	35.4765	26.765	-0.406513	-1.07147	0.0326	0.203691	no	OK	35.4765	25.3118	-0.48705	-1.29275	0.00975	0.0862405	no	OK	26.765	25.3118	-0.0805367	-0.208817	0.67285	0.942248	no
XLOC_000705	CG31883	TSS936	chr2L:9521209-9540060	0	0.621386	0.0413457	0.216783	0.115465	0.489335	0.397942	0.297734	0.504645	0.505021	0.159486	0.224564	NOTEST	0.348429	0.219879	-0.664156	0	1	1	no	NOTEST	0.348429	0.325119	-0.0998968	0	1	1	no	NOTEST	0.219879	0.325119	0.56426	0	1	1	no
XLOC_000706	CG17855	TSS937	chr2L:9540522-9542480	37.3029	45.055	33.6226	38.8344	25.6234	25.5728	29.6858	31.4006	27.6806	24.7838	26.4077	31.108	OK	27.495	38.7037	0.493301	1.164	0.01845	0.136635	no	OK	27.495	28.0707	0.0298922	0.0686578	0.89095	0.986298	no	OK	38.7037	28.0707	-0.463409	-1.09514	0.02615	0.17562	no
XLOC_000707	Cpr30B	TSS938	chr2L:9542877-9543658	1.11179	0.157814	0.219152	1.76388	0	0.556006	0.384144	1.14758	1.2277	0.299437	1.1822	0.651761	OK	0.840275	0.81316	-0.0473233	-0.0232755	0.9628	0.994712	no	OK	0.840275	0.521933	-0.686997	-0.34965	0.5057	0.875871	no	OK	0.81316	0.521933	-0.639673	-0.3385	0.5199	0.882052	no
XLOC_000708	CG13113	TSS939	chr2L:9544170-9544875	0	0	0.369271	0.0775362	0	0	0	0	0	0	0	0	NOTEST	0	0.111702	inf	0	1	1	no	NOTEST	0	0	0	0	1	1	no	NOTEST	0.111702	0	#NAME?	0	1	1	no
XLOC_000709	CG13114	TSS940	chr2L:9545810-9547424	0	0	0	0	0	0	0.0514167	0.0384951	0	0	0	0.0144956	NOTEST	0.00362391	0	#NAME?	0	1	1	no	NOTEST	0.00362391	0.022478	2.63289	0	1	1	no	NOTEST	0	0.022478	inf	0	1	1	no
XLOC_000710	CG3838	TSS941,TSS942	chr2L:9568889-9576769	9.12917	8.08319	14.627	8.64435	10.7829	13.1901	11.1382	12.0694	11.2962	12.3025	19.4274	10.1948	OK	13.3052	10.1209	-0.394651	-0.361734	0.47445	0.855283	no	OK	13.3052	11.7951	-0.173801	-0.16898	0.74625	0.962435	no	OK	10.1209	11.7951	0.220849	0.201443	0.6934	0.948538	no
XLOC_000711	CG3841	TSS943,TSS944	chr2L:9589475-9591783	0	0	4.41608	0.0233553	0	0.227693	0.0584527	0.540364	0	0.0677946	2.43408	0.0109765	OK	0.628213	1.10986	0.821051	0.485584	0.7193	0.956604	no	OK	0.628213	0.206627	-1.60422	-0.85751	0.58635	0.91279	no	OK	1.10986	0.206627	-2.42527	-1.44842	0.4847	0.860963	no
XLOC_000712	gcm2	TSS945	chr2L:9608561-9612706	0	0.119157	0.0185816	0.0584087	0	0.0198432	0	0.0121655	0	0	0.0143465	0	NOTEST	0.00358663	0.0490367	3.77316	0	1	1	no	NOTEST	0.00358663	0.00800217	1.15776	0	1	1	no	NOTEST	0.0490367	0.00800217	-2.6154	0	1	1	no
XLOC_000713	Trx-2	TSS946,TSS947	chr2L:9613165-9616404	412.623	317.016	175.872	197.068	251.206	247.367	225.868	228.296	194.924	202.517	166.265	212.139	OK	193.961	275.645	0.507044	1.31556	0.0089	0.0807688	no	OK	193.961	238.184	0.296311	0.783755	0.11455	0.45038	no	OK	275.645	238.184	-0.210733	-0.551884	0.2684	0.682154	no
XLOC_000714	GlcAT-S	TSS948,TSS949	chr2L:9616468-9623109	31.4419	27.6049	19.9068	22.5114	17.7326	17.0577	18.5686	22.593	22.3932	24.0079	20.6823	20.8511	OK	21.9836	25.3662	0.206478	0.464161	0.3595	0.772636	no	OK	21.9836	18.988	-0.211345	-0.466899	0.34735	0.762483	no	OK	25.3662	18.988	-0.417822	-0.925551	0.0611	0.309753	no
XLOC_000715	Apoltp	TSS950	chr2L:9634178-9656026	1.98984	1.72137	1.3095	0.576721	0.307666	0.354332	0.37671	0.558907	0.433384	0.287301	0.288348	0.541338	OK	0.387593	1.39936	1.85215	2.61625	5e-05	0.00129868	yes	NOTEST	0.387593	0.399404	0.0433071	0	1	1	no	OK	1.39936	0.399404	-1.80885	-2.52974	5e-05	0.00129868	yes
XLOC_000716	CG33299	TSS951	chr2L:9656599-9657424	0	0	0	0	0	0.0655519	0.058579	0	0	0	0	0	NOTEST	0	0	0	0	1	1	no	NOTEST	0	0.0310327	inf	0	1	1	no	NOTEST	0	0.0310327	inf	0	1	1	no
XLOC_000717	hoip	TSS952	chr2L:9699790-9700459	12.4062	27.7654	94.829	75.5638	121.009	136.783	138.81	111.75	134.657	213.541	163.012	133.617	OK	161.207	52.6411	-1.61465	-3.32089	5e-05	0.00129868	yes	OK	161.207	127.088	-0.343085	-0.825732	0.09755	0.412007	no	OK	52.6411	127.088	1.27156	2.59746	5e-05	0.00129868	yes
XLOC_000718	pelo	TSS953	chr2L:9700809-9708883	23.2907	18.9217	24.063	22.3267	25.0854	24.5097	26.7297	22.8336	22.1189	24.4336	22.2394	22.4212	OK	22.8033	22.1505	-0.0418982	-0.0747633	0.884	0.985578	no	OK	22.8033	24.7896	0.120495	0.229064	0.64635	0.933581	no	OK	22.1505	24.7896	0.162393	0.304608	0.54635	0.895298	no
XLOC_000719	CG13116	TSS954	chr2L:9711511-9746495	0	0	0	0	0	0	0	0	0	0	0	0.0981584	NOTEST	0.0245396	0	#NAME?	0	1	1	no	NOTEST	0.0245396	0	#NAME?	0	1	1	no	NOTEST	0	0	0	0	1	1	no
XLOC_000720	CG13117	TSS955	chr2L:9711511-9746495	13.3767	8.72355	4.14498	3.02549	3.57083	3.58439	1.91997	3.53817	2.54189	3.92895	1.31675	1.54487	OK	2.33311	7.31769	1.64913	1.77731	0.0013	0.0189171	yes	OK	2.33311	3.15334	0.434626	0.437195	0.387	0.795506	no	OK	7.31769	3.15334	-1.21451	-1.40246	0.00555	0.0577244	no
XLOC_000721	zf30C	TSS956	chr2L:9758341-9762375	12.9329	12.4056	19.4857	17.9257	21.9569	22.8392	25.0506	21.6093	21.5834	16.2027	21.0787	18.8276	OK	19.4231	15.6875	-0.308159	-0.718535	0.142	0.50616	no	OK	19.4231	22.864	0.235303	0.569462	0.2476	0.662218	no	OK	15.6875	22.864	0.543463	1.28305	0.0102	0.0890106	no
XLOC_000722	und	TSS957,TSS958	chr2L:9763368-9765338	167.907	150.622	181.48	190.415	156.678	175.185	158.386	168.546	188.096	212.482	208.631	207.978	OK	204.297	172.606	-0.243184	-0.669516	0.17865	0.568103	no	OK	204.297	164.699	-0.310837	-0.85751	0.08325	0.3739	no	OK	172.606	164.699	-0.0676534	-0.184558	0.7108	0.954413	no
XLOC_000723	CG4017	TSS959	chr2L:9765356-9770996	7.51959	2.25103	1.32789	1.07284	1.45994	1.2445	0.894968	0.978011	2.53089	1.74082	1.38791	1.29551	OK	1.73878	3.04284	0.807341	0.244056	0.3573	0.770337	no	OK	1.73878	1.14435	-0.603543	-0.366802	0.4451	0.836568	no	OK	3.04284	1.14435	-1.41088	-0.41123	0.172	0.556855	no
XLOC_000724	CG17633	TSS960	chr2L:9765356-9770996	162.698	1.01583	3.79062	1.20637	0.706495	0.617518	1.98332	3.47865	0.877532	0.756701	0.887986	0.717932	OK	0.810038	42.1777	5.70235	3.5102	0.0053	0.0558138	no	OK	0.810038	1.6965	1.0665	0.581171	0.28655	0.702941	no	OK	42.1777	1.6965	-4.63585	-3.53528	0.00455	0.0496321	yes
XLOC_000725	IP3K1	TSS961,TSS962	chr2L:9782383-9788499	42.1037	44.5013	37.8638	34.7721	35.3156	31.2783	26.9565	30.5467	33.8595	29.4584	40.4301	42.722	OK	36.6175	39.8102	0.120606	0.281191	0.5725	0.907274	no	OK	36.6175	31.0243	-0.239136	-0.549489	0.2694	0.683179	no	OK	39.8102	31.0243	-0.359742	-0.830621	0.09575	0.407471	no
XLOC_000726	CG4036	TSS963	chr2L:9790881-9791958	6.18188	5.36905	7.26906	8.93089	13.4204	10.7769	13.1471	7.10699	16.0285	5.61208	7.66828	11.1785	OK	10.1218	6.93772	-0.544936	-0.729192	0.14775	0.515047	no	OK	10.1218	11.1128	0.134759	0.19419	0.6979	0.949971	no	OK	6.93772	11.1128	0.679695	0.930573	0.0658	0.324099	no
XLOC_000727	CR43766	TSS964	chr2L:9793316-9886250	0	0	0	0	0	0	0	0	0	0	0	0	NOTEST	0	0	0	0	1	1	no	NOTEST	0	0	0	0	1	1	no	NOTEST	0	0	0	0	1	1	no
XLOC_000728	CR44701	TSS965	chr2L:9887038-9887389	0	0	0.295854	0	0	0.34832	0	0	0	1.59711	0	0	NOTEST	0.399276	0.0739634	-2.4325	0	1	1	no	NOTEST	0.399276	0.08708	-2.19697	0	1	1	no	NOTEST	0.0739634	0.08708	0.235529	0	1	1	no
XLOC_000729	FKBP59	TSS966	chr2L:9888004-9890772	87.119	78.7205	100.21	105.707	155.99	167.269	144.82	112.511	149.039	124.819	100.152	106.732	OK	120.185	92.9392	-0.370904	-0.969442	0.05325	0.283357	no	OK	120.185	145.147	0.272256	0.721919	0.14945	0.518322	no	OK	92.9392	145.147	0.643161	1.69752	0.0006	0.0102591	yes
XLOC_000730	CG4537	TSS967	chr2L:9890884-9893446	9.34322	3.41784	4.48152	1.81598	3.77192	4.65286	3.94785	2.2558	3.70454	5.05379	4.50054	3.63233	OK	4.2228	4.76464	0.174168	0.062619	0.9091	0.988609	no	OK	4.2228	3.65711	-0.207496	-0.0934148	0.80295	0.973334	no	OK	4.76464	3.65711	-0.381665	-0.135203	0.75285	0.96359	no
XLOC_000731	Bka	TSS968	chr2L:9895286-9896104	3.83806	11.3303	21.9448	18.3703	15.3469	16.437	18.9914	17.9336	12.4413	30.7283	21.2731	18.0384	OK	20.6203	13.8709	-0.572007	-0.859157	0.08705	0.38386	no	OK	20.6203	17.1772	-0.263568	-0.418487	0.3926	0.800498	no	OK	13.8709	17.1772	0.308439	0.454156	0.3612	0.774118	no
XLOC_000732	Srp54	TSS969	chr2L:9912910-9915044	39.8579	45.8183	41.6102	43.4732	46.4805	51.9414	48.7287	47.871	39.9713	52.7559	48.0213	46.7963	OK	46.8862	42.6899	-0.135268	-0.344423	0.48565	0.861689	no	OK	46.8862	48.7554	0.0563989	0.144296	0.77445	0.967966	no	OK	42.6899	48.7554	0.191667	0.488654	0.32545	0.742547	no
XLOC_000733	yip2	TSS970	chr2L:9915252-9917220	105.205	94.6032	91.9381	124.54	123.117	124.719	110.539	97.4161	122.102	131.973	109.681	129.896	OK	123.413	104.072	-0.245916	-0.651726	0.1827	0.574409	no	OK	123.413	113.948	-0.115121	-0.306789	0.53395	0.889026	no	OK	104.072	113.948	0.130796	0.345357	0.48055	0.858547	no
XLOC_000734	CG4594,CG4598	TSS971,TSS972	chr2L:9918617-9921459	22.1357	21.3049	18.3922	28.4547	34.3828	37.1633	47.7031	22.891	33.198	26.4242	26.4219	31.9858	OK	29.5075	22.5719	-0.386554	-0.744539	0.1409	0.504564	no	OK	29.5075	35.535	0.268163	0.544233	0.28575	0.702002	no	OK	22.5719	35.535	0.654716	1.27488	0.01125	0.0958359	no
XLOC_000735	CG4592	TSS973	chr2L:9921632-9924865	10.9335	4.17004	4.58975	6.60056	5.09314	4.38628	5.38434	4.18165	4.76587	3.80972	5.98541	5.14368	OK	4.92617	6.57346	0.416187	0.504625	0.30345	0.719905	no	OK	4.92617	4.76135	-0.0490944	-0.0558522	0.90895	0.988609	no	OK	6.57346	4.76135	-0.465281	-0.548782	0.27135	0.685875	no
XLOC_000736	CG42366	TSS974	chr2L:9925160-9930378	0	0.252656	0.0506717	0.377055	0.0701215	0.184906	0.179085	0.221546	0.3604	0.0817398	0.286928	0.0930652	NOTEST	0.205533	0.170096	-0.273024	0	1	1	no	NOTEST	0.205533	0.163914	-0.326429	0	1	1	no	NOTEST	0.170096	0.163914	-0.053405	0	1	1	no
XLOC_000737	CG42367	TSS975	chr2L:9930579-9931131	0	0	0	0.512692	0	0.404142	0	0	0	0	0	0	NOTEST	0	0.128173	inf	0	1	1	no	NOTEST	0	0.101035	inf	0	1	1	no	NOTEST	0.128173	0.101035	-0.343229	0	1	1	no
XLOC_000738	CR45007	TSS976	chr2L:9934766-9938833	10.0184	9.39109	13.7988	9.39806	4.9271	5.62518	6.20357	10.3139	10.3071	9.35612	12.9788	7.50452	OK	10.0366	10.6516	0.0857933	0.0910442	0.84815	0.981241	no	OK	10.0366	6.76744	-0.568595	-0.619106	0.2089	0.614022	no	OK	10.6516	6.76744	-0.654388	-0.692213	0.15195	0.522669	no
XLOC_000739	CG4619	TSS977	chr2L:9938862-9947648	1.72375	1.46717	4.56974	4.26165	3.67506	4.47142	6.61088	4.36806	4.80676	10.1006	8.55492	4.45839	OK	6.98017	3.00558	-1.21562	-1.19724	0.0391	0.229901	no	OK	6.98017	4.78135	-0.545843	-0.778817	0.12915	0.482404	no	OK	3.00558	4.78135	0.669777	0.648068	0.1873	0.582157	no
XLOC_000740	CG4709	TSS978,TSS979	chr2L:9954324-9957019	5.90558	4.36552	5.19524	4.65508	5.31501	4.09916	5.73948	4.05909	6.51646	5.8121	5.79901	3.84158	OK	5.49229	5.03036	-0.126747	-0.156259	0.75435	0.963735	no	OK	5.49229	4.80319	-0.193415	-0.238276	0.63585	0.931086	no	OK	5.03036	4.80319	-0.0666684	-0.0813675	0.8715	0.984721	no
XLOC_000741	CG4658	TSS980,TSS981	chr2L:9957131-9963949	22.0081	22.7574	21.6634	21.3222	19.5366	18.313	19.2052	18.7655	17.8261	21.7466	24.8862	22.6642	OK	21.7808	21.9378	0.0103629	0.018269	0.97085	0.99583	no	OK	21.7808	18.9551	-0.200471	-0.345279	0.49305	0.867398	no	OK	21.9378	18.9551	-0.210834	-0.362422	0.4651	0.849882	no
XLOC_000742	CR43683	TSS982	chr2L:9957131-9963949	8.71547	4.66525	7.42834	8.9747	7.4596	6.73507	8.36301	6.39852	5.36891	9.99756	9.45007	7.38043	OK	8.04924	7.44594	-0.112399	-0.0771691	0.87895	0.98534	no	OK	8.04924	7.23905	-0.153053	-0.112602	0.82375	0.977029	no	OK	7.44594	7.23905	-0.0406539	-0.0284188	0.9554	0.993716	no
XLOC_000743	RpL13	TSS983	chr2L:9967312-9968645	2019.92	1764.51	2328.93	2646.9	2355.11	2769.63	2230.51	2133.93	2688.76	3009.05	2831.7	2914.95	OK	2861.11	2190.06	-0.385604	-1.07659	0.0293	0.190128	no	OK	2861.11	2372.3	-0.270293	-0.756702	0.12685	0.478055	no	OK	2190.06	2372.3	0.115311	0.321243	0.5125	0.879164	no
XLOC_000744	bib	TSS984	chr2L:9983670-9995538	11.4905	10.1042	18.6314	30.5703	23.5867	24.4628	27.9356	32.8959	31.1877	40.646	33.9576	30.2776	OK	34.0172	17.6991	-0.942587	-2.25719	5e-05	0.00129868	yes	OK	34.0172	27.2203	-0.321584	-0.82115	0.09695	0.410624	no	OK	17.6991	27.2203	0.621003	1.47099	0.00325	0.0381405	yes
XLOC_000745	CG4747	TSS985	chr2L:10003831-10008889	37.2249	38.6726	48.1226	44.1696	76.6942	73.8511	82.272	57.3352	50.8222	59.1399	54.7094	57.9308	OK	55.6506	42.0474	-0.404379	-1.07554	0.03105	0.197894	no	OK	55.6506	72.5381	0.382342	1.03624	0.0376	0.224635	no	OK	42.0474	72.5381	0.786721	2.10093	5e-05	0.00129868	yes
XLOC_000746	Trp1	TSS986,TSS987	chr2L:10009380-10013170	41.4348	48.1439	51.8076	46.1085	48.9009	45.922	45.3251	53.3869	42.729	52.1687	58.6709	42.6624	OK	49.0578	46.8737	-0.0657024	-0.160027	0.7507	0.963073	no	OK	49.0578	48.3837	-0.0199606	-0.0489733	0.9228	0.990594	no	OK	46.8737	48.3837	0.0457418	0.111891	0.81845	0.976145	no
XLOC_000747	CG13127	TSS988	chr2L:10026675-10029298	0	0	0	0.0685475	0	0	0	0	0	0	0.0378888	0	NOTEST	0.00947219	0.0171369	0.855333	0	1	1	no	NOTEST	0.00947219	0	#NAME?	0	1	1	no	NOTEST	0.0171369	0	#NAME?	0	1	1	no
XLOC_000748	obst-B	TSS989	chr2L:10032689-10038954	0	0	0	0	0	0	0.035627	0	0.186368	0	0	0	NOTEST	0.0465921	0	#NAME?	0	1	1	no	NOTEST	0.0465921	0.00890676	-2.38711	0	1	1	no	NOTEST	0	0.00890676	inf	0	1	1	no
XLOC_000749	CG33301	TSS990	chr2L:10049579-10051201	0	0	1.17706	0.145849	0	0.335548	0.152103	0.59199	0	0.0582887	0.778291	0.120362	NOTEST	0.239236	0.330729	0.467215	0	1	1	no	NOTEST	0.239236	0.26991	0.174048	0	1	1	no	NOTEST	0.330729	0.26991	-0.293167	0	1	1	no
XLOC_000750	CR44874	TSS991	chr2L:10051361-10052289	0	0	0	0	0	0	0	0.0686387	0	0	0	0	NOTEST	0	0	0	0	1	1	no	NOTEST	0	0.0171597	inf	0	1	1	no	NOTEST	0	0.0171597	inf	0	1	1	no
XLOC_000751	CR44875	TSS992	chr2L:10053603-10054100	0	0	0	0	0	0	0	0	0	0	0	0	NOTEST	0	0	0	0	1	1	no	NOTEST	0	0	0	0	1	1	no	NOTEST	0	0	0	0	1	1	no
XLOC_000752	Cpr31A	TSS993	chr2L:10054212-10055935	0	0	0	0	0	0.0809698	0	0.0493263	0	0.0766349	0	0	NOTEST	0.0191587	0	#NAME?	0	1	1	no	NOTEST	0.0191587	0.032574	0.76572	0	1	1	no	NOTEST	0	0.032574	inf	0	1	1	no
XLOC_000753	Pen	TSS994	chr2L:10056899-10060095	1.50735	2.10128	2.83353	6.93286	44.9971	43.0299	53.5123	13.99	22.0998	10.346	10.2829	22.2858	OK	16.2536	3.34375	-2.28122	-3.75109	5e-05	0.00129868	yes	OK	16.2536	38.8823	1.25835	2.87321	5e-05	0.00129868	yes	OK	3.34375	38.8823	3.53957	5.989	5e-05	0.00129868	yes
XLOC_000754	Spn31A	TSS995	chr2L:10060815-10063925	0	0	0	0.066595	0.353386	0.204407	0.138894	0	0.0484413	0.161333	0.0245132	0.0313312	NOTEST	0.0664046	0.0166488	-1.99587	0	1	1	no	NOTEST	0.0664046	0.174172	1.39116	0	1	1	no	NOTEST	0.0166488	0.174172	3.38702	0	1	1	no
XLOC_000755	CG34109	TSS996	chr2L:10064120-10180256	0	0	0	0.0709105	0	0	0	0.0110811	0.077359	0	0	0.0166603	NOTEST	0.0235048	0.0177276	-0.406958	0	1	1	no	NOTEST	0.0235048	0.00277027	-3.08486	0	1	1	no	NOTEST	0.0177276	0.00277027	-2.6779	0	1	1	no
XLOC_000756	CG4839	TSS997	chr2L:10064120-10180256	2.41964	0.404965	4.71231	0.915901	1.3389	0.864382	0.598608	1.83546	0.513917	0.362463	1.10708	0.627154	OK	0.652654	2.1132	1.69504	1.76999	0.00135	0.0195157	yes	OK	0.652654	1.15934	0.82891	0.660472	0.16545	0.54686	no	OK	2.1132	1.15934	-0.866133	-0.74725	0.10415	0.426296	no
XLOC_000757	CG13137	TSS998	chr2L:10064120-10180256	0	0	0	0.0687126	0	0	0	0.06437	0	0	0	0.0484953	NOTEST	0.0121238	0.0171782	0.502728	0	1	1	no	NOTEST	0.0121238	0.0160925	0.408542	0	1	1	no	NOTEST	0.0171782	0.0160925	-0.0941865	0	1	1	no
XLOC_000758	RpL7	TSS999	chr2L:10201003-10202321	3517.49	3306.05	4441.61	4801.86	3577.52	4045.77	3585.66	4092.9	4389.14	5123.41	5055.54	4883.76	OK	4862.96	4016.75	-0.275805	-0.755668	0.13235	0.488492	no	OK	4862.96	3825.46	-0.346202	-0.955417	0.0589	0.302892	no	OK	4016.75	3825.46	-0.0703964	-0.193803	0.70145	0.951298	no
XLOC_000759	CR44845	TSS1000,TSS1001	chr2L:10207084-10209786	0	0	0.0745372	1.19531	1.15668	0	0	0.569309	1.70831	0	0	0.300836	NOTEST	0.502287	0.317461	-0.661931	0	1	1	no	NOTEST	0.502287	0.431498	-0.219158	0	1	1	no	NOTEST	0.317461	0.431498	0.442774	0	1	1	no
XLOC_000760	CG4901	TSS1002	chr2L:10211169-10213721	12.8859	15.8124	16.1254	13.5373	15.7264	18.3589	18.8358	15.5642	20.5162	24.203	18.9207	18.1071	OK	20.4368	14.5903	-0.486161	-1.06898	0.03165	0.199894	no	OK	20.4368	17.1213	-0.255374	-0.573403	0.24675	0.66118	no	OK	14.5903	17.1213	0.230787	0.498901	0.30915	0.724896	no
XLOC_000761	Prosalpha6	TSS1003	chr2L:10221350-10222546	149.711	140.146	115.329	120.262	178.146	182.533	159.016	120.121	132.046	139.042	120.906	138.821	OK	132.704	131.362	-0.0146623	-0.0384713	0.9369	0.99274	no	OK	132.704	159.954	0.269447	0.708322	0.16035	0.538507	no	OK	131.362	159.954	0.28411	0.745388	0.1356	0.495503	no
XLOC_000762	CG4908	TSS1004	chr2L:10222656-10224447	15.0549	14.1629	14.7842	16.2335	14.094	17.8125	15.7872	10.6828	18.0728	15.7617	12.5955	16.3156	OK	15.6864	15.0589	-0.058902	-0.108957	0.8235	0.977029	no	OK	15.6864	14.5941	-0.104128	-0.193146	0.70055	0.950685	no	OK	15.0589	14.5941	-0.0452264	-0.0827284	0.8671	0.984334	no
XLOC_000763	eEF1delta	TSS1005	chr2L:10232506-10234450	107.303	109.965	145.872	125.842	223.44	222.072	202.721	153.499	186.351	223.476	174.091	180.706	OK	191.156	122.246	-0.644969	-1.66707	0.00085	0.0135541	yes	OK	191.156	200.433	0.0683672	0.180586	0.7166	0.955834	no	OK	122.246	200.433	0.713336	1.84285	0.0003	0.00585337	yes
XLOC_000764	me31B	TSS1006,TSS1007	chr2L:10239340-10242172	67.8641	67.0095	83.6226	85.0913	103.711	99.9184	112.079	92.8284	74.4626	78.897	81.9003	80.9312	OK	79.0478	75.8969	-0.0586845	-0.153033	0.7549	0.963735	no	OK	79.0478	102.134	0.36967	0.981299	0.0464	0.257785	no	OK	75.8969	102.134	0.428354	1.12665	0.0233	0.16203	no
XLOC_000765	CR44995	TSS1008	chr2L:10242511-10247078	12.7402	9.6689	22.6259	10.9615	14.6926	10.71	14.3125	15.4026	12.8933	14.9378	21.5716	16.775	OK	16.5444	13.9991	-0.241006	-0.115965	0.89135	0.986298	no	OK	16.5444	13.7794	-0.263829	-0.12862	0.835	0.978853	no	OK	13.9991	13.7794	-0.0228229	-0.0107969	0.97615	0.996746	no
XLOC_000766	CG31717	TSS1009	chr2L:10250736-10251714	133.819	103.09	61.7829	68.2092	46.9599	58.3266	46.371	59.5102	50.9155	69.3306	63.5636	53.6771	OK	59.3717	91.7251	0.627541	1.44821	0.00395	0.0445999	yes	OK	59.3717	52.7919	-0.169458	-0.37859	0.4444	0.83628	no	OK	91.7251	52.7919	-0.796999	-1.80733	0.00025	0.00508582	yes
XLOC_000767	Ror	TSS1010	chr2L:10251842-10255891	2.94943	4.56904	1.85107	2.85935	5.99891	4.15797	4.11944	4.36035	3.19949	2.378	3.27084	3.42996	OK	3.06957	3.05722	-0.00581795	-0.00436885	0.99265	0.998502	no	OK	3.06957	4.65917	0.602034	0.538535	0.2845	0.701097	no	OK	3.05722	4.65917	0.607852	0.475993	0.33005	0.746269	no
XLOC_000768	CG18619	TSS1011	chr2L:10264124-10265229	170.391	160.67	186.441	151.984	88.4469	90.8139	91.4541	130.285	110.573	126.339	162.954	108.498	OK	127.091	167.372	0.397194	0.93339	0.06165	0.311163	no	OK	127.091	100.25	-0.342259	-0.754374	0.13535	0.495285	no	OK	167.372	100.25	-0.739453	-1.66504	0.00105	0.0159693	yes
XLOC_000769	Mob3	TSS1012	chr2L:10265335-10266570	13.1971	11.7531	24.0936	23.6476	16.9504	16.9471	15.7508	17.209	14.5482	21.2549	19.0753	15.9914	OK	17.7174	18.1729	0.0366144	0.0613744	0.8961	0.987025	no	OK	17.7174	16.7143	-0.0840871	-0.140215	0.77715	0.968155	no	OK	18.1729	16.7143	-0.120702	-0.200419	0.6828	0.945935	no
XLOC_000770	CG4953	TSS1013	chr2L:10266702-10268748	6.90079	5.3273	7.67008	5.21709	5.18103	5.6812	6.79437	5.22104	7.47325	9.19805	6.09698	5.00647	OK	6.94369	6.27881	-0.145209	-0.225815	0.6486	0.934298	no	OK	6.94369	5.71941	-0.279835	-0.427582	0.3983	0.805053	no	OK	6.27881	5.71941	-0.134626	-0.203605	0.6835	0.945935	no
XLOC_000771	CG4957	TSS1014	chr2L:10268871-10269904	2.61523	3.95829	5.74333	6.93005	6.60582	7.64129	7.64486	7.78234	7.71652	7.15651	6.68684	6.87613	OK	7.109	4.81172	-0.563093	-0.639553	0.19885	0.599188	no	OK	7.109	7.41857	0.061495	0.0752037	0.87925	0.98534	no	OK	4.81172	7.41857	0.624588	0.727058	0.13005	0.484438	no
XLOC_000772	Mulk	TSS1015	chr2L:10270050-10278811	9.49031	7.88618	16.4068	16.3485	15.4097	19.5541	18.743	13.5189	15.8564	21.5677	17.6259	16.138	OK	17.797	12.533	-0.50591	-0.567904	0.25095	0.664349	no	OK	17.797	16.8064	-0.0826234	-0.0975543	0.84265	0.980781	no	OK	12.533	16.8064	0.423287	0.484337	0.32905	0.745712	no
XLOC_000773	CR44968	TSS1016	chr2L:10295858-10299847	0	1.42659	3.25631	2.42884	0.898368	0.808126	2.96576	2.25015	0	1.62573	1.29375	1.56808	OK	1.12189	1.77793	0.664271	0.203756	0.76595	0.966857	no	OK	1.12189	1.7306	0.625343	0.185174	0.7083	0.953876	no	OK	1.77793	1.7306	-0.0389283	-0.0125716	0.9784	0.996794	no
XLOC_000774	CG4968	TSS1017	chr2L:10306921-10308045	24.1962	35.3222	32.4664	33.6454	34.3618	30.3377	37.2937	28.0186	30.0572	29.4708	30.8308	26.6454	OK	29.2511	31.4076	0.102623	0.206764	0.6718	0.942248	no	OK	29.2511	32.5029	0.152081	0.30799	0.51945	0.881916	no	OK	31.4076	32.5029	0.0494585	0.100915	0.83735	0.979208	no
XLOC_000775	CG4972	TSS1018	chr2L:10314791-10324990	42.4858	44.33	40.8289	39.222	46.5463	42.9402	49.8985	40.0823	31.0541	42.3163	39.6357	40.6749	OK	38.4202	41.7167	0.118758	0.22939	0.642	0.933074	no	OK	38.4202	44.8668	0.223784	0.448057	0.36785	0.77975	no	OK	41.7167	44.8668	0.105025	0.206052	0.67985	0.944836	no
XLOC_000776	CG4995	TSS1019,TSS1020	chr2L:10314791-10324990	3.49829	0	0.308343	0.283493	0	0.0414683	0.202217	0.327983	0.587821	0.274412	0	0.473979	OK	0.334053	1.02253	1.614	0.296039	0.37955	0.789181	no	NOTEST	0.334053	0.142917	-1.2249	0	1	1	no	OK	1.02253	0.142917	-2.8389	-0.341439	0.1532	0.524841	no
XLOC_000777	CG5037	TSS1021	chr2L:10331470-10333129	9.84876	11.3046	20.9209	19.9043	16.5887	17.1352	18.5365	16.2669	18.3376	26.4186	22.3486	18.1977	OK	21.3256	15.4947	-0.460818	-0.905278	0.0625	0.313794	no	OK	21.3256	17.1318	-0.315908	-0.636217	0.1975	0.597258	no	OK	15.4947	17.1318	0.14491	0.277483	0.5691	0.905568	no
XLOC_000778	GATAd	TSS1022,TSS1023	chr2L:10333733-10339185	63.9439	76.8347	50.9583	54.838	63.139	64.2856	61.7776	53.9387	53.3902	44.7869	48.6201	50.0993	OK	49.2241	61.6437	0.324589	0.856617	0.08995	0.391818	no	OK	49.2241	60.7852	0.304356	0.802875	0.1101	0.440262	no	OK	61.6437	60.7852	-0.0202331	-0.0539588	0.91305	0.989704	no
XLOC_000779	SamDC	TSS1024	chr2L:10339456-10341503	19.6107	15.4299	10.9388	10.636	14.8212	15.7422	14.3707	14.5452	11.6633	14.0521	8.58604	13.1702	OK	11.8679	14.1538	0.254128	0.428382	0.3918	0.800064	no	OK	11.8679	14.8698	0.325321	0.556193	0.2643	0.676909	no	OK	14.1538	14.8698	0.0711933	0.124411	0.80435	0.973334	no
XLOC_000780	CG31715	TSS1025	chr2L:10341615-10342523	81.9732	70.0587	45.1228	63.3718	70.8287	67.6345	59.2652	56.4493	75.3693	61.8017	46.0326	54.0111	OK	59.3037	65.1316	0.135237	0.276017	0.5856	0.912495	no	OK	59.3037	63.5444	0.0996434	0.202171	0.6888	0.947524	no	OK	65.1316	63.5444	-0.0355935	-0.0732826	0.8847	0.98582	no
XLOC_000781	Sps2	TSS1026,TSS1027	chr2L:10342593-10344223	35.4983	36.5081	41.4437	38.8448	33.9501	32.0356	34.1939	31.9512	35.4031	30.732	28.0659	33.5932	OK	31.9485	38.0737	0.253045	0.575418	0.248	0.662369	no	OK	31.9485	33.0327	0.0481457	0.108247	0.82935	0.977837	no	OK	38.0737	33.0327	-0.204899	-0.469988	0.3466	0.761493	no
XLOC_000782	CG5022	TSS1028	chr2L:10344441-10347706	3.94348	3.44406	5.24981	5.63265	5.27474	4.64938	4.40575	4.88856	4.33593	6.67736	6.10366	5.83081	OK	5.73694	4.5675	-0.328876	-0.499059	0.31875	0.735529	no	OK	5.73694	4.80461	-0.255863	-0.388118	0.443	0.835553	no	OK	4.5675	4.80461	0.0730134	0.107859	0.81995	0.976428	no
XLOC_000783	CG5045	TSS1029	chr2L:10356794-10358078	27.362	31.0001	32.8725	37.8449	43.638	46.664	45.0087	35.3666	38.6185	34.8623	34.3702	37.1588	OK	36.2524	32.2699	-0.167891	-0.356186	0.4778	0.856825	no	OK	36.2524	42.6693	0.235121	0.512046	0.30355	0.719963	no	OK	32.2699	42.6693	0.403012	0.864354	0.0857	0.380309	no
XLOC_000784	pim	TSS1030	chr2L:10362988-10364092	2.17501	6.56258	6.20694	3.87279	6.50081	8.05296	8.32325	3.99694	5.03359	7.92798	5.15067	3.65145	OK	5.44092	4.70433	-0.209863	-0.236282	0.6322	0.929307	no	OK	5.44092	6.71849	0.304286	0.370319	0.47145	0.853173	no	OK	4.70433	6.71849	0.514148	0.590171	0.24335	0.657198	no
XLOC_000785	lft	TSS1031	chr2L:10364470-10366410	0	0	0.364112	0.150668	0.253561	0.0390823	0.191117	0.238358	0.666497	0	0	0.177277	NOTEST	0.210944	0.128695	-0.712899	0	1	1	no	NOTEST	0.210944	0.18053	-0.224621	0	1	1	no	NOTEST	0.128695	0.18053	0.488278	0	1	1	no
XLOC_000786	CG5056	TSS1032	chr2L:10366691-10367946	20.1649	19.8028	19.9345	17.0445	16.5485	14.6986	14.1564	16.1563	12.567	15.9703	17.8787	14.0301	OK	15.1115	19.2367	0.348208	0.638455	0.2023	0.604303	no	OK	15.1115	15.3899	0.0263381	0.0472546	0.91995	0.989854	no	OK	19.2367	15.3899	-0.32187	-0.594461	0.22585	0.638107	no
XLOC_000787	dpr19	TSS1033,TSS1034	chr2L:10376167-10379905	8.91556	4.20022	7.98729	3.6288	7.15719	5.3829	4.61145	9.71455	3.28633	2.95956	3.39177	3.34232	OK	3.245	6.18297	0.930083	1.40146	0.0059	0.0604423	no	OK	3.245	6.71652	1.0495	1.59175	0.00195	0.0258761	yes	OK	6.18297	6.71652	0.119415	0.201332	0.683	0.945935	no
XLOC_000788	CG5096,gny	TSS1035,TSS1036	chr2L:10380102-10384723	275.33	285.652	228.535	246.187	227.173	212.72	213.661	237.005	206.209	216.972	213.804	238.253	OK	218.81	258.926	0.242865	0.671651	0.18035	0.570972	no	OK	218.81	222.64	0.0250355	0.0692888	0.89095	0.986298	no	OK	258.926	222.64	-0.217829	-0.603825	0.22435	0.635988	no
XLOC_000789	mRpS7	TSS1037	chr2L:10386661-10387652	27.4741	30.2201	39.8086	37.6815	53.0515	54.5301	52.9829	31.7964	56.7878	32.2059	38.285	35.8073	OK	40.7715	33.7961	-0.270706	-0.533264	0.28525	0.701684	no	OK	40.7715	48.0902	0.238183	0.48908	0.33435	0.751067	no	OK	33.7961	48.0902	0.508889	1.02667	0.043	0.244982	no
XLOC_000790	da	TSS1038	chr2L:10388104-10393228	61.1482	52.7667	45.695	53.9941	62.281	65.7103	56.1834	55.6859	63.7703	60.9953	55.1599	53.3422	OK	58.3169	53.401	-0.127049	-0.339056	0.49785	0.870812	no	OK	58.3169	59.9651	0.0402092	0.108212	0.8238	0.977029	no	OK	53.401	59.9651	0.167258	0.448815	0.36845	0.780156	no
XLOC_000791	Cnot4	TSS1039,TSS1040,TSS1041	chr2L:10396715-10405203	54.9388	58.5966	49.8664	46.1464	37.0569	42.4282	38.9407	42.7895	37.0136	44.222	50.7126	38.9044	OK	42.7131	52.3871	0.294531	0.718313	0.1608	0.539386	no	OK	42.7131	40.3038	-0.0837636	-0.200214	0.69885	0.950458	no	OK	52.3871	40.3038	-0.378294	-0.910867	0.0734	0.34498	no
XLOC_000792	Ir31a	TSS1042	chr2L:10405564-10408197	1.18942	0.632356	0.0985829	0.0826373	0.327737	0.21064	0.241267	0.374369	0.420762	0.379599	0.441472	0.11652	OK	0.339588	0.500748	0.560298	0.393183	0.41155	0.815014	no	NOTEST	0.339588	0.288503	-0.235199	0	1	1	no	OK	0.500748	0.288503	-0.795496	-0.55143	0.2512	0.664581	no
XLOC_000793	Ip259,RpS27A	TSS1043	chr2L:10408351-10410456	5264.77	5046.11	6314.15	6733.7	5851.36	6282.63	5725.38	5962.7	6723.9	6845.02	6491.74	7252.69	OK	6828.34	5839.68	-0.225644	-0.610195	0.21535	0.624262	no	OK	6828.34	5955.52	-0.197307	-0.537062	0.27485	0.689727	no	OK	5839.68	5955.52	0.0283373	0.0770745	0.8749	0.985234	no
XLOC_000794	Klp31E	TSS1044,TSS1045	chr2L:10414016-10418991	5.99894	4.33932	7.61697	6.86655	7.02672	6.44445	6.63168	8.30346	5.90021	5.47555	7.12452	5.60494	OK	6.0263	6.20545	0.0422614	0.0814954	0.8734	0.985195	no	OK	6.0263	7.10158	0.236866	0.468113	0.3487	0.763871	no	OK	6.20545	7.10158	0.194605	0.384029	0.4399	0.833913	no
XLOC_000795	RfC3	TSS1046	chr2L:10419189-10420612	1.56456	1.86416	1.28172	2.81819	10.4982	6.89518	9.11649	3.22094	3.09095	2.18842	2.55177	4.75668	OK	3.14696	1.88216	-0.741571	-0.686189	0.1583	0.53413	no	OK	3.14696	7.43269	1.23993	1.47334	0.0027	0.0331114	yes	OK	1.88216	7.43269	1.9815	1.99015	0.0011	0.0166062	yes
XLOC_000796	CG5168	TSS1047	chr2L:10423290-10425482	143.953	137.246	99.3895	111.214	90.5384	86.4785	83.822	89.7402	110.07	98.0787	101.003	98.3391	OK	101.873	122.951	0.271309	0.728844	0.14335	0.508881	no	OK	101.873	87.6448	-0.217029	-0.575995	0.24515	0.659796	no	OK	122.951	87.6448	-0.488338	-1.30315	0.01005	0.0881855	no
XLOC_000797	KdelR	TSS1048	chr2L:10426886-10428632	235.77	256.642	193.754	186.314	170.117	197.93	169.634	190.462	191.208	216.829	191.484	189.694	OK	197.304	218.12	0.144705	0.388461	0.4389	0.833161	no	OK	197.304	182.036	-0.116195	-0.310763	0.53365	0.888682	no	OK	218.12	182.036	-0.260899	-0.700659	0.15945	0.536366	no
XLOC_000798	CG5188	TSS1049	chr2L:10428828-10430918	5.48248	8.94383	8.09891	6.26373	8.27983	5.6055	7.52336	6.96048	7.45654	7.46697	5.68885	6.52648	OK	6.78471	7.19724	0.0851565	0.0807071	0.87325	0.985181	no	OK	6.78471	7.09229	0.0639653	0.0628367	0.89835	0.987025	no	OK	7.19724	7.09229	-0.0211912	-0.0198279	0.96735	0.995379	no
XLOC_000799	TfIIB	TSS1050	chr2L:10431337-10435656	20.817	24.584	23.167	20.1313	27.741	24.8165	27.8411	22.3387	26.9284	23.6667	27.7252	23.5519	OK	25.4681	22.1748	-0.199766	-0.381615	0.44285	0.835553	no	OK	25.4681	25.6843	0.0121997	0.0231945	0.963	0.994712	no	OK	22.1748	25.6843	0.211966	0.390938	0.43335	0.830157	no
XLOC_000800	holn1	TSS1051	chr2L:10435994-10437316	6.0168	2.66426	5.62571	5.57335	5.40818	6.29802	6.51702	5.05443	6.27381	7.53886	5.02896	4.59625	OK	5.85947	4.97003	-0.237517	-0.29725	0.5505	0.897679	no	OK	5.85947	5.81941	-0.00989731	-0.0130208	0.97755	0.996794	no	OK	4.97003	5.81941	0.227619	0.285149	0.5696	0.905809	no
XLOC_000801	CHIP	TSS1052	chr2L:10437547-10439240	17.1755	16.781	21.0925	18.5986	17.1729	15.4127	18.1665	19.6622	17.0489	15.3602	13.8549	16.9374	OK	15.8004	18.4119	0.220681	0.411983	0.4111	0.81463	no	OK	15.8004	17.6036	0.15591	0.289652	0.55315	0.898682	no	OK	18.4119	17.6036	-0.0647713	-0.122838	0.80535	0.973334	no
XLOC_000802	CG13142	TSS1053	chr2L:10439439-10441047	1.93048	5.27797	7.774	7.14537	5.9684	3.43701	4.66209	5.03503	3.31946	5.8122	6.17684	4.4381	OK	4.93665	5.53195	0.164256	0.191109	0.6992	0.950458	no	OK	4.93665	4.77563	-0.0478411	-0.056538	0.9098	0.988669	no	OK	5.53195	4.77563	-0.212097	-0.246314	0.6221	0.926064	no
XLOC_000803	loh	TSS1054,TSS1055,TSS1056	chr2L:10442533-10450080	3.51304	2.25562	2.779	2.28976	2.3514	1.52597	1.50597	2.04919	2.64584	1.71926	2.33174	1.37343	OK	2.01757	2.70936	0.425334	0.557308	0.26315	0.675832	no	OK	2.01757	1.85813	-0.118765	-0.145057	0.77405	0.967966	no	OK	2.70936	1.85813	-0.544099	-0.724639	0.1595	0.536408	no
XLOC_000804	LM408	TSS1057	chr2L:10457657-10462472	2.31697	3.37448	49.4834	1.54206	1.00025	0.552891	1.09631	2.6623	1.54437	0.854442	0.680226	1.50199	OK	1.14526	14.1792	3.63003	4.57432	5e-05	0.00129868	yes	OK	1.14526	1.32794	0.213517	0.235936	0.6397	0.932079	no	OK	14.1792	1.32794	-3.41652	-4.31616	5e-05	0.00129868	yes
XLOC_000805	RluA-2	TSS1058	chr2L:10477072-10482975	8.19875	7.75925	13.5304	8.01169	8.69361	6.3315	9.04656	9.22477	10.6811	12.7225	11.5116	10.0071	OK	11.2306	9.37503	-0.26054	-0.47136	0.35835	0.771431	no	OK	11.2306	8.32411	-0.432068	-0.768843	0.12575	0.475412	no	OK	9.37503	8.32411	-0.171527	-0.294685	0.56145	0.902628	no
XLOC_000806	Grip75	TSS1059	chr2L:10483294-10488622	6.36385	7.26146	8.50006	6.98908	9.18417	6.58366	9.43756	6.7499	9.36083	4.53356	8.50907	6.96054	OK	7.341	7.27861	-0.0123129	-0.0129996	0.97955	0.996794	no	OK	7.341	7.98882	0.122006	0.130578	0.79195	0.971072	no	OK	7.27861	7.98882	0.134319	0.145075	0.7658	0.966857	no
XLOC_000807	CG6144	TSS1060,TSS1061	chr2L:10488693-10491454	8.5163	8.17483	8.35645	5.84911	7.75577	6.50665	9.936	8.64983	7.84815	6.3693	8.36834	6.34501	OK	7.2327	7.72417	0.0948459	0.129069	0.79925	0.97299	no	OK	7.2327	8.21206	0.18321	0.25667	0.6183	0.924284	no	OK	7.72417	8.21206	0.0883643	0.123983	0.8114	0.974917	no
XLOC_000808	CR44224	TSS1062	chr2L:10491813-10507015	65.1175	69.2445	44.7479	37.6117	25.1522	38.5546	22.31	43.4367	43.6565	45.9248	51.3079	38.6059	OK	44.8738	54.1804	0.271897	0.121782	0.86475	0.983535	no	OK	44.8738	32.3634	-0.47151	-0.199962	0.8138	0.975275	no	OK	54.1804	32.3634	-0.743407	-0.334257	0.7587	0.964714	no
XLOC_000809	CG6094	TSS1063	chr2L:10507080-10510453	6.65545	4.68014	9.45068	14.1804	17.5547	12.7757	17.4219	12.8568	10.5872	10.682	8.41677	8.98543	OK	9.66786	8.74165	-0.145291	-0.170249	0.7447	0.962276	no	OK	9.66786	15.1523	0.648266	0.830002	0.1013	0.420036	no	OK	8.74165	15.1523	0.793557	0.994395	0.05425	0.286971	no
XLOC_000810	Lrr47	TSS1064	chr2L:10517334-10519269	1.91557	2.23342	3.4106	2.59977	5.20559	3.89706	4.16524	3.19128	2.44981	3.86186	2.61011	2.61393	OK	2.88393	2.53984	-0.183298	-0.210793	0.6756	0.943348	no	OK	2.88393	4.11479	0.512784	0.638166	0.21185	0.619639	no	OK	2.53984	4.11479	0.696082	0.831014	0.0985	0.413761	no
XLOC_000811	CG18301,Lip4	TSS1065,TSS1066,TSS1067,TSS1068	chr2L:10527571-10533647	9.12548	7.99614	2.94721	5.47631	4.19944	3.00621	1.65274	1.94704	4.69749	5.54691	2.24344	5.62108	OK	4.52723	6.38629	0.496348	0.707027	0.1631	0.542839	no	OK	4.52723	2.70136	-0.744946	-0.925563	0.0685	0.330972	no	OK	6.38629	2.70136	-1.24129	-1.6076	0.00325	0.0381405	yes
XLOC_000812	CG18302	TSS1069	chr2L:10534321-10536587	0	0	0	0	0	0	0	0.0132933	0	0	0	0.0399999	NOTEST	0.00999998	0	#NAME?	0	1	1	no	NOTEST	0.00999998	0.00332332	-1.5893	0	1	1	no	NOTEST	0	0.00332332	inf	0	1	1	no
XLOC_000813	Trim9	TSS1070	chr2L:10544882-10628054	37.3103	29.7526	45.0864	26.241	52.4279	51.2792	56.4919	66.4567	34.2428	36.1411	42.3421	43.7168	OK	39.1107	34.5976	-0.176893	-0.459141	0.35415	0.76776	no	OK	39.1107	56.6639	0.534867	1.42872	0.00405	0.0455136	yes	OK	34.5976	56.6639	0.71176	1.86272	5e-05	0.00129868	yes
XLOC_000814	CG6138	TSS1071	chr2L:10544882-10628054	0	0	0	0.28262	0	0.657597	0.235944	0.0881256	0	0	0.155909	0.266742	NOTEST	0.105663	0.0706549	-0.580606	0	1	1	no	NOTEST	0.105663	0.245417	1.21577	0	1	1	no	NOTEST	0.0706549	0.245417	1.79637	0	1	1	no
XLOC_000815	CG34160	TSS1072	chr2L:10544882-10628054	0	0	0	0	0	0.132021	0	0	0	0	0	0	NOTEST	0	0	0	0	1	1	no	NOTEST	0	0.0330052	inf	0	1	1	no	NOTEST	0	0.0330052	inf	0	1	1	no
XLOC_000816	CR45351	TSS1073	chr2L:10638561-10639592	0	0	0	0	0	0.0996445	0.0809238	0.272381	0	0.282642	0.0713209	0.0456818	NOTEST	0.0999111	0	#NAME?	0	1	1	no	NOTEST	0.0999111	0.113237	0.180634	0	1	1	no	NOTEST	0	0.113237	inf	0	1	1	no
XLOC_000817	CG31872	TSS1074	chr2L:10639930-10643539	0.522461	0.323167	0.410223	0.0396313	0.278881	0.188205	0.121213	0.0825755	0.0576511	0.153132	0.0779179	0.0620563	NOTEST	0.0876893	0.323871	1.88495	0	1	1	no	NOTEST	0.0876893	0.167719	0.93557	0	1	1	no	NOTEST	0.323871	0.167719	-0.949375	0	1	1	no
XLOC_000818	CG18284	TSS1075	chr2L:10643970-10645891	0	0	0.123924	0.0918473	0	0.313005	0.0270883	0.0811276	0	0	0.143458	0.0152738	NOTEST	0.039683	0.0539427	0.442906	0	1	1	no	NOTEST	0.039683	0.105305	1.40798	0	1	1	no	NOTEST	0.0539427	0.105305	0.965077	0	1	1	no
XLOC_000819	CG17097	TSS1076	chr2L:10646414-10650152	0	0.0266141	0.0747933	0.0391752	0.103349	0.0797116	0.0544531	0.204037	0	0.151337	0.0577588	0.0245341	NOTEST	0.0584074	0.0351457	-0.732805	0	1	1	no	NOTEST	0.0584074	0.110388	0.918357	0	1	1	no	NOTEST	0.0351457	0.110388	1.65116	0	1	1	no
XLOC_000820	CR44580	TSS1077	chr2L:10650856-10651454	4.54135	0	0	0	0	0	0	0.0705856	0	0	0	0	OK	0	1.13534	inf	#NAME?	0.07715	0.354627	no	NOTEST	0	0.0176464	inf	0	1	1	no	OK	1.13534	0.0176464	-6.0076	-0.787136	0.19255	0.590208	no
XLOC_000821	CG17098	TSS1078	chr2L:10651612-10654499	0	0	0.140699	0.0655141	0.324368	0.0500355	0.0683015	0.0511764	0.0476484	0.348186	0.036214	0.0846457	NOTEST	0.129174	0.0515532	-1.32518	0	1	1	no	NOTEST	0.129174	0.12347	-0.0651444	0	1	1	no	NOTEST	0.0515532	0.12347	1.26003	0	1	1	no
XLOC_000822	CR45692	TSS1079	chr2L:10657626-10658031	0	0	0	0	0	0	0	0	0	0	0	0	NOTEST	0	0	0	0	1	1	no	NOTEST	0	0	0	0	1	1	no	NOTEST	0	0	0	0	1	1	no
XLOC_000823	CG45690	TSS1080	chr2L:10658280-10658559	0	0	0	0	0	0	0	0	0	0	0	0	NOTEST	0	0	0	0	1	1	no	NOTEST	0	0	0	0	1	1	no	NOTEST	0	0	0	0	1	1	no
XLOC_000824	CG31871	TSS1081	chr2L:10662080-10671487	0	0	0	0	0	0.0990322	0	0	0	0.0563652	0	0.0182655	NOTEST	0.0186577	0	#NAME?	0	1	1	no	NOTEST	0.0186577	0.0247581	0.408129	0	1	1	no	NOTEST	0	0.0247581	inf	0	1	1	no
XLOC_000825	CG17104	TSS1082,TSS1083,TSS1084	chr2L:10677197-10679707	0	0	0	0	0	0	0	0	0	0	0	0	NOTEST	0	0	0	0	1	1	no	NOTEST	0	0	0	0	1	1	no	NOTEST	0	0	0	0	1	1	no
XLOC_000826	CG17105	TSS1085	chr2L:10681029-10681775	0	0	0	0	0	0	0	0	0	0	0	0	NOTEST	0	0	0	0	1	1	no	NOTEST	0	0	0	0	1	1	no	NOTEST	0	0	0	0	1	1	no
XLOC_000827	CG17107	TSS1086	chr2L:10681901-10682528	0	0	0	0	0	0	0	0	0	0	0	0	NOTEST	0	0	0	0	1	1	no	NOTEST	0	0	0	0	1	1	no	NOTEST	0	0	0	0	1	1	no
XLOC_000828	CR44181	TSS1087	chr2L:10694999-10698195	0	0	0	0	0	0	0	0	0	0	0	0	NOTEST	0	0	0	0	1	1	no	NOTEST	0	0	0	0	1	1	no	NOTEST	0	0	0	0	1	1	no
XLOC_000829	CG6415	TSS1088	chr2L:10701939-10709453	0	0	0	0	0	0	0	0	0	0	0	0	NOTEST	0	0	0	0	1	1	no	NOTEST	0	0	0	0	1	1	no	NOTEST	0	0	0	0	1	1	no
XLOC_000830	CR44407	TSS1089	chr2L:10710100-10710733	0	0	0	0	0	0	0	0	0	0	0	0	NOTEST	0	0	0	0	1	1	no	NOTEST	0	0	0	0	1	1	no	NOTEST	0	0	0	0	1	1	no
XLOC_000831	CG6431	TSS1090,TSS1091	chr2L:10724202-10728740	0	0	0	0	0.054453	0.0419954	0.034173	0	0	0	0	0.0385623	NOTEST	0.00964058	0	#NAME?	0	1	1	no	NOTEST	0.00964058	0.0326553	1.76013	0	1	1	no	NOTEST	0	0.0326553	inf	0	1	1	no
XLOC_000832	CG17118,CG6443	TSS1092,TSS1093	chr2L:10728977-10731356	15.3622	14.8552	17.2985	13.5659	16.2855	14.3337	14.0039	13.1016	15.7802	12.646	16.1671	11.9805	OK	14.1434	15.2704	0.110608	0.192829	0.70065	0.950685	no	OK	14.1434	14.4312	0.0290549	0.0504161	0.92	0.989854	no	OK	15.2704	14.4312	-0.0815528	-0.142934	0.77545	0.968019	no
XLOC_000833	Dpy-30L1	TSS1094	chr2L:10732652-10736071	9.91342	8.79646	10.4883	8.87963	19.1988	14.1838	15.6836	12.9317	13.545	13.1874	12.0892	12.5056	OK	12.8318	9.51946	-0.43077	-0.353493	0.46875	0.851767	no	OK	12.8318	15.4995	0.272497	0.244694	0.62035	0.925192	no	OK	9.51946	15.4995	0.703266	0.590545	0.2317	0.645131	no
XLOC_000834	CG12299	TSS1095	chr2L:10737344-10740762	6.64637	9.63989	10.7436	11.3083	9.89806	8.58847	10.6267	8.39901	9.86137	11.3618	12.0794	9.89954	OK	10.8005	9.58453	-0.172323	-0.366689	0.45365	0.841204	no	OK	10.8005	9.37806	-0.203741	-0.436435	0.3648	0.776497	no	OK	9.58453	9.37806	-0.031418	-0.0657381	0.89125	0.986298	no
XLOC_000835	mir-4970	TSS1096	chr2L:10740781-10743935	0	527.211	0	0	0	0	22.1911	17.5888	0	0	0	0	OK	0	131.803	inf	#NAME?	0.17435	0.561163	no	NOTEST	0	9.94496	inf	0	1	1	no	OK	131.803	9.94496	-3.72827	-8.85565	0.32515	0.742048	no
XLOC_000836	CG6495	TSS1097	chr2L:10761115-10764971	23.9522	21.7602	22.2314	19.1602	28.4132	21.8966	21.0118	31.5507	19.4005	16.6139	19.8124	17.3666	OK	18.2983	21.776	0.251027	0.588196	0.2352	0.649318	no	OK	18.2983	25.7181	0.491071	1.15726	0.0215	0.153045	no	OK	21.776	25.7181	0.240043	0.574881	0.243	0.656974	no
XLOC_000837	CG17127	TSS1098	chr2L:10770867-10771370	0	0	0	0	0	0	0	0	0	0	0	0	NOTEST	0	0	0	0	1	1	no	NOTEST	0	0	0	0	1	1	no	NOTEST	0	0	0	0	1	1	no
XLOC_000838	CG31870	TSS1099	chr2L:10772037-10801109	0	0	0	0	0	0	0	0	0	0	0	0	NOTEST	0	0	0	0	1	1	no	NOTEST	0	0	0	0	1	1	no	NOTEST	0	0	0	0	1	1	no
XLOC_000839	CG6508	TSS1100	chr2L:10804273-10837511	0	0	0.0991206	0	0	0	0.115587	0	0	0	0	0	NOTEST	0	0.0247802	inf	0	1	1	no	NOTEST	0	0.0288968	inf	0	1	1	no	NOTEST	0.0247802	0.0288968	0.221723	0	1	1	no
XLOC_000840	CG17134	TSS1101	chr2L:10804273-10837511	0	0	0.146052	0	0	0	0.0319399	0	0	0	0	0.0360362	NOTEST	0.00900905	0.036513	2.01896	0	1	1	no	NOTEST	0.00900905	0.00798497	-0.174089	0	1	1	no	NOTEST	0.036513	0.00798497	-2.19305	0	1	1	no
XLOC_000841	CG43129	TSS1102,TSS1103	chr2L:10847226-10856644	0	0	0	0.292138	0.0966443	0.149069	0.0684695	0.11986	0.0708287	0.141335	0.02015	0.128609	NOTEST	0.0902305	0.0730345	-0.305037	0	1	1	no	NOTEST	0.0902305	0.108511	0.266153	0	1	1	no	NOTEST	0.0730345	0.108511	0.571189	0	1	1	no
XLOC_000842	Stam	TSS1104	chr2L:10858535-10862006	136.495	123.78	76.2824	102.384	87.8735	89.0531	97.3862	82.4882	80.6962	63.0014	77.7722	82.3991	OK	75.9672	109.735	0.53058	1.43356	0.00445	0.0488766	yes	OK	75.9672	89.2002	0.231671	0.629988	0.20865	0.613539	no	OK	109.735	89.2002	-0.298909	-0.81557	0.10345	0.425194	no
XLOC_000843	CG12517	TSS1105	chr2L:10870166-10870722	0	0	0	0	0	0	0.089178	0.0664944	0.310847	0	0	0	NOTEST	0.0777117	0	#NAME?	0	1	1	no	NOTEST	0.0777117	0.0389181	-0.99769	0	1	1	no	NOTEST	0	0.0389181	inf	0	1	1	no
XLOC_000844	CR45453	TSS1106	chr2L:10870866-10871133	0	0	0	0	0	0	0	0	0	0	0	0	NOTEST	0	0	0	0	1	1	no	NOTEST	0	0	0	0	1	1	no	NOTEST	0	0	0	0	1	1	no
XLOC_000845	CR45454	TSS1107	chr2L:10872013-10872384	0	0	0	0	0	0	0	0.248887	0	0	0	0	NOTEST	0	0	0	0	1	1	no	NOTEST	0	0.0622217	inf	0	1	1	no	NOTEST	0	0.0622217	inf	0	1	1	no
XLOC_000846	CR44490	TSS1108	chr2L:10886453-10887199	0	0	0	0	0	0	0	0	0	0	0	0	NOTEST	0	0	0	0	1	1	no	NOTEST	0	0	0	0	1	1	no	NOTEST	0	0	0	0	1	1	no
XLOC_000847	CG14072	TSS1109,TSS1110	chr2L:10917014-10964153	0.853627	0	0.557157	0	0	0	0	0	0	0	0	0.0554923	NOTEST	0.0138731	0.352696	4.66807	0	1	1	no	NOTEST	0.0138731	0	#NAME?	0	1	1	no	NOTEST	0.352696	0	#NAME?	0	1	1	no
XLOC_000848	YL-1	TSS1111	chr2L:10970442-10972093	11.7807	16.9101	13.7739	16.6854	17.4142	18.1084	18.9131	17.8627	18.1504	17.6362	19.5476	14.3558	OK	17.4225	14.7875	-0.23657	-0.42826	0.38995	0.797811	no	OK	17.4225	18.0746	0.0530127	0.0992899	0.8464	0.981108	no	OK	14.7875	18.0746	0.289582	0.527066	0.3023	0.718605	no
XLOC_000849	CG16743	TSS1112,TSS1113	chr2L:10972279-10973408	0	0	0.484146	1.1616	1.07136	0.152668	0	0.226361	0.105651	0	0.266533	0.0933064	NOTEST	0.116373	0.411436	1.82192	0	1	1	no	NOTEST	0.116373	0.362597	1.63961	0	1	1	no	NOTEST	0.411436	0.362597	-0.182304	0	1	1	no
XLOC_000850	SCAR	TSS1114	chr2L:10976771-10987420	37.1571	37.939	32.6323	34.0229	33.5941	37.6407	32.7811	34.8907	38.3001	39.0711	36.988	36.8741	OK	37.8083	35.4378	-0.0934136	-0.226755	0.65555	0.936298	no	OK	37.8083	34.7266	-0.122661	-0.252003	0.60885	0.920921	no	OK	35.4378	34.7266	-0.0292474	-0.0604396	0.90135	0.987863	no
XLOC_000851	CG12253	TSS1115	chr2L:10987805-10989241	0.705055	4.63993	7.83091	6.45119	9.14385	5.72968	8.93815	7.42128	5.80204	6.40921	6.84782	4.78487	OK	5.96098	4.90677	-0.280777	-0.35156	0.48135	0.858744	no	OK	5.96098	7.80824	0.389447	0.532475	0.27855	0.69487	no	OK	4.90677	7.80824	0.670224	0.886	0.073	0.343551	no
XLOC_000852	CG16833	TSS1116	chr2L:10989400-11001476	6.02447	11.5043	17.7149	14.9343	14.8178	15.486	17.8496	17.4493	16.6058	24.0553	19.8068	19.8581	OK	20.0815	12.5445	-0.678812	-1.51125	0.0029	0.0349796	yes	OK	20.0815	16.4007	-0.29211	-0.674726	0.17995	0.570021	no	OK	12.5445	16.4007	0.386701	0.851124	0.0902	0.39237	no
XLOC_000853	lectin-33A	TSS1117	chr2L:11002071-11002738	3.05712	0.38587	1.51349	1.21574	1.38836	1.16786	1.79614	2.27256	2.99459	0.915445	1.85141	1.32644	OK	1.77197	1.54305	-0.199567	-0.138808	0.7746	0.967966	no	OK	1.77197	1.65623	-0.0974524	-0.0693682	0.88935	0.986298	no	OK	1.54305	1.65623	0.102114	0.0707506	0.88375	0.985491	no
XLOC_000854	Nup154	TSS1118	chr2L:11004819-11011086	6.62567	7.67645	8.78333	8.05762	13.6574	15.194	17.4754	10.8446	11.2681	13.2533	11.6533	12.5523	OK	12.1817	7.78577	-0.64581	-1.40871	0.00485	0.0519931	no	OK	12.1817	14.2928	0.230571	0.522972	0.28885	0.704658	no	OK	7.78577	14.2928	0.876381	1.91204	0.00015	0.00335951	yes
XLOC_000855	dUTPase	TSS1119	chr2L:11011311-11012135	58.2927	48.3482	50.56	69.048	221.648	225.304	193.506	96.7184	107.296	104.903	81.5513	110.207	OK	100.989	56.5622	-0.836291	-1.88665	0.00015	0.00335951	yes	OK	100.989	184.294	0.867808	2.13238	0.0001	0.00237535	yes	OK	56.5622	184.294	1.7041	3.94496	5e-05	0.00129868	yes
XLOC_000856	Acp32CD	TSS1120	chr2L:11013205-11066998	0	0.840325	0	0.0584581	0	0	0.0978128	0.109359	0.680941	0.68311	0.300879	0.110136	NOTEST	0.443767	0.224696	-0.981829	0	1	1	no	NOTEST	0.443767	0.0517928	-3.09898	0	1	1	no	NOTEST	0.224696	0.0517928	-2.11715	0	1	1	no
XLOC_000857	CG14913	TSS1121	chr2L:11013205-11066998	0	0.387892	0.207097	0.135656	0.179702	0.332536	0.249007	0.220323	0.0394686	0.210113	0.0799277	0.229646	NOTEST	0.139789	0.182661	0.385919	0	1	1	no	NOTEST	0.139789	0.245392	0.811838	0	1	1	no	NOTEST	0.182661	0.245392	0.425919	0	1	1	no
XLOC_000858	CG18666	TSS1122	chr2L:11013205-11066998	0	0	0	0	6.49806	6.51296	3.59309	3.34643	0.869617	3.28887	1.31167	0.735836	OK	1.5515	0	#NAME?	#NAME?	0.1225	0.468508	no	OK	1.5515	4.98763	1.68469	0.506698	0.39965	0.80639	no	OK	0	4.98763	inf	#NAME?	0.14695	0.513822	no
XLOC_000859	CG14915	TSS1123	chr2L:11071026-11071532	0	0	0.348758	0.244467	0.166343	0	0.204237	0	0.355916	0	0.178908	0.0579275	NOTEST	0.148188	0.148306	0.00115296	0	1	1	no	NOTEST	0.148188	0.092645	-0.677643	0	1	1	no	NOTEST	0.148306	0.092645	-0.678796	0	1	1	no
XLOC_000860	CG43725	TSS1124	chr2L:11075512-11075962	0	0	0	0	0	0	0	0	0	0	0	0	NOTEST	0	0	0	0	1	1	no	NOTEST	0	0	0	0	1	1	no	NOTEST	0	0	0	0	1	1	no
XLOC_000861	CG16854	TSS1125,TSS1126	chr2L:11086720-11090973	0	0.232155	0.220739	0.130118	0.0764032	0	0.0271295	0.0722589	0	0.0372658	0.0359615	0.0724049	NOTEST	0.036408	0.145753	2.00119	0	1	1	no	NOTEST	0.036408	0.0439479	0.271537	0	1	1	no	NOTEST	0.145753	0.0439479	-1.72966	0	1	1	no
XLOC_000862	CG4705	TSS1127	chr2L:11091443-11095096	4.89766	8.78238	10.8507	7.69453	6.73753	6.9734	8.18189	9.3209	8.59323	7.99208	8.59714	8.11692	OK	8.32484	8.05632	-0.0473018	-0.0952957	0.85005	0.981286	no	OK	8.32484	7.80343	-0.0933148	-0.18914	0.69965	0.950458	no	OK	8.05632	7.80343	-0.046013	-0.09202	0.8537	0.981712	no
XLOC_000863	l(2)gd1	TSS1128	chr2L:11106942-11113061	86.1892	89.1136	71.5893	71.3299	61.0365	68.014	62.4933	62.9932	59.4255	56.7574	61.94	64.8264	OK	60.7373	79.5555	0.389379	0.922964	0.06525	0.322621	no	OK	60.7373	63.6342	0.0672204	0.154271	0.7551	0.963735	no	OK	79.5555	63.6342	-0.322158	-0.745508	0.13625	0.496287	no
XLOC_000864	Gr32a	TSS1129	chr2L:11114013-11120319	5.40472	3.06555	1.84464	3.92454	2.94403	3.83342	2.64797	3.0642	3.6942	1.48096	2.97505	3.27073	OK	2.85524	3.55986	0.318211	0.161983	0.75845	0.964678	no	OK	2.85524	3.1224	0.129047	0.0637665	0.90655	0.988348	no	OK	3.55986	3.1224	-0.189164	-0.0976539	0.83935	0.979957	no
XLOC_000865	Nup160	TSS1130	chr2L:11123776-11130645	8.36052	7.65718	10.3384	9.40699	15.6739	16.1525	18.2276	10.3429	10.0957	10.2321	10.0669	12.4676	OK	10.7156	8.94078	-0.261235	-0.558762	0.2567	0.669722	no	OK	10.7156	15.0992	0.494766	1.07981	0.02815	0.184717	no	OK	8.94078	15.0992	0.756002	1.64744	0.00135	0.0195157	yes
XLOC_000866	CG4751	TSS1131	chr2L:11130736-11136003	5.81017	8.1352	10.9621	9.90031	10.2068	12.6486	12.131	11.1206	9.52643	12.4092	12.5187	11.2439	OK	11.4246	8.70195	-0.39273	-0.907487	0.0651	0.322436	no	OK	11.4246	11.5268	0.0128465	0.0307152	0.94915	0.993315	no	OK	8.70195	11.5268	0.405576	0.937803	0.0576	0.298459	no
XLOC_000867	hgo	TSS1132	chr2L:11136392-11138565	0	0.738813	0.0626878	0.164284	0.087166	0	0.0548217	0.0615599	0	0.031837	0.266083	0.0772884	NOTEST	0.0938022	0.241446	1.36401	0	1	1	no	NOTEST	0.0938022	0.0508869	-0.882327	0	1	1	no	NOTEST	0.241446	0.0508869	-2.24634	0	1	1	no
XLOC_000868	CG4788	TSS1133	chr2L:11156117-11203544	0.732338	3.90995	4.99164	4.14133	5.72246	3.44808	4.80996	4.25857	2.60917	7.60306	4.48157	3.62916	OK	4.58074	3.44381	-0.411574	-0.234092	0.63815	0.931611	no	OK	4.58074	4.55977	-0.00662056	-0.00447197	0.99335	0.998571	no	OK	3.44381	4.55977	0.404954	0.230758	0.62685	0.928019	no
XLOC_000869	ab,snoRNA:Me18S-G642	TSS1134,TSS1135,TSS1136	chr2L:11210677-11269002	1.33377	0.893401	1.18367	0.514441	0.944118	0.597031	0.495421	0.986127	0.747543	0.662091	0.273199	0.59938	OK	0.570553	0.981321	0.782363	0.321117	0.3434	0.758883	no	OK	0.570553	0.755674	0.405403	0.145279	0.6662	0.940688	no	OK	0.981321	0.755674	-0.37696	-0.153318	0.64145	0.932891	no
XLOC_000870	cana	TSS1137,TSS1138	chr2L:11269779-11277846	14.1555	18.2563	17.5105	16.0367	8.3626	12.2838	12.6059	11.4	12.1208	18.7106	16.0131	12.3077	OK	14.788	16.4898	0.15714	0.388172	0.43345	0.830157	no	OK	14.788	11.1631	-0.405696	-0.980657	0.04905	0.268136	no	OK	16.4898	11.1631	-0.562836	-1.37162	0.00635	0.0636847	no
XLOC_000871	CG33695	TSS1139,TSS1140,TSS1141	chr2L:11278020-11279982	12.0495	7.06106	11.3836	6.57605	9.64135	10.4592	10.5005	10.6762	11.6627	12.7156	11.6858	9.20043	OK	11.3161	9.26755	-0.288121	-0.468786	0.34415	0.759368	no	OK	11.3161	10.3193	-0.133035	-0.221335	0.6532	0.935669	no	OK	9.26755	10.3193	0.155086	0.250169	0.60925	0.920921	no
XLOC_000872	Ppt2	TSS1142	chr2L:11280056-11281920	5.17138	6.79002	10.4684	3.93195	3.32167	3.52761	3.1098	5.90701	4.94591	8.94162	7.29319	3.12362	OK	6.07608	6.59044	0.117233	0.154722	0.7458	0.962315	no	OK	6.07608	3.96652	-0.615267	-0.751431	0.12035	0.464256	no	OK	6.59044	3.96652	-0.7325	-0.909657	0.0558	0.292414	no
XLOC_000873	mre11	TSS1143	chr2L:11282089-11285706	41.4035	41.2893	34.8046	42.6227	34.6515	28.7239	32.1132	29.1058	45.5987	34.7517	39.305	46.5608	OK	41.5541	40.0301	-0.0539064	-0.134235	0.79125	0.970932	no	OK	41.5541	31.1486	-0.415824	-1.01409	0.0411	0.237178	no	OK	40.0301	31.1486	-0.361917	-0.883852	0.07565	0.351059	no
XLOC_000874	CR43721	TSS1144	chr2L:11307752-11308038	0	0	0	0	0	0	0	0	0	0	0	0	NOTEST	0	0	0	0	1	1	no	NOTEST	0	0	0	0	1	1	no	NOTEST	0	0	0	0	1	1	no
XLOC_000875	CR44583	TSS1145	chr2L:11318943-11319259	0	0	0	0	0	0	0	0.669559	0	0	0	0	NOTEST	0	0	0	0	1	1	no	NOTEST	0	0.16739	inf	0	1	1	no	NOTEST	0	0.16739	inf	0	1	1	no
XLOC_000876	CR44586	TSS1146	chr2L:11354000-11354329	0	0	0	0	0	0	0	0	0	0	0	0	NOTEST	0	0	0	0	1	1	no	NOTEST	0	0	0	0	1	1	no	NOTEST	0	0	0	0	1	1	no
XLOC_000877	salr	TSS1147,TSS1148	chr2L:11358872-11373636	0	0	0	0.021195	0.0980645	0.0937918	0.0769779	0.157369	0.246649	0	0.0928213	0.0845488	NOTEST	0.106005	0.00529875	-4.32233	0	1	1	no	NOTEST	0.106005	0.106551	0.00741199	0	1	1	no	NOTEST	0.00529875	0.106551	4.32975	0	1	1	no
XLOC_000878	CG43355,sala	TSS1149,TSS1150,TSS1151	chr2L:11484706-11486949	0	0	0	0	0	0	0	0	0	0	0	0	NOTEST	0	0	0	0	1	1	no	NOTEST	0	0	0	0	1	1	no	NOTEST	0	0	0	0	1	1	no
XLOC_000879	spz4	TSS1152	chr2L:11501714-11517081	0.488827	0.123332	0.360482	0.513607	0.0598123	0.19993	0.0252251	0.151049	0	0.073036	0.211584	0.127738	NOTEST	0.10309	0.371562	1.8497	0	1	1	no	NOTEST	0.10309	0.109004	0.080483	0	1	1	no	NOTEST	0.371562	0.109004	-1.76922	0	1	1	no
XLOC_000880	CG14929,CG4970	TSS1153,TSS1154	chr2L:11517390-11521444	0	0	0	0.0408423	0	0	0	0	0	0	0	0	NOTEST	0	0.0102106	inf	0	1	1	no	NOTEST	0	0	0	0	1	1	no	NOTEST	0.0102106	0	#NAME?	0	1	1	no
XLOC_000881	CG34162	TSS1155	chr2L:11531819-11534547	0	0	0	0	0	0	0	0	0	0	0	0	NOTEST	0	0	0	0	1	1	no	NOTEST	0	0	0	0	1	1	no	NOTEST	0	0	0	0	1	1	no
XLOC_000882	CG43438	TSS1156	chr2L:11536144-11536844	0	0	0	0	0.118653	0	0	0	0	0	0	0	NOTEST	0	0	0	0	1	1	no	NOTEST	0	0.0296632	inf	0	1	1	no	NOTEST	0	0.0296632	inf	0	1	1	no
XLOC_000883	CR44495	TSS1157	chr2L:11561200-11561966	0	0	0	0	0	0	0	0	0	0	0	0	NOTEST	0	0	0	0	1	1	no	NOTEST	0	0	0	0	1	1	no	NOTEST	0	0	0	0	1	1	no
XLOC_000884	kek2	TSS1158	chr2L:11581936-11626883	0.581247	0.114066	0.225863	0.1494	2.64712	3.55247	1.60922	1.19084	1.94664	0.696587	0.656524	1.62185	OK	1.2304	0.267644	-2.20074	-2.28162	0.00025	0.00508582	yes	OK	1.2304	2.24991	0.870741	1.31151	0.0103	0.0896918	no	OK	0.267644	2.24991	3.07148	3.32879	5e-05	0.00129868	yes
XLOC_000885	CR44496	TSS1159	chr2L:11581936-11626883	0	0	0	0	0.511848	0.789352	0.237441	0	0.965676	0	0	0	NOTEST	0.241419	0	#NAME?	0	1	1	no	NOTEST	0.241419	0.38466	0.672046	0	1	1	no	NOTEST	0	0.38466	inf	0	1	1	no
XLOC_000886	CG4983	TSS1160	chr2L:11652447-11654164	0	0	0.37446	0.216529	3.30604	2.69881	1.59575	0.473245	1.94277	1.22456	0.318754	0.865648	OK	1.08793	0.147747	-2.88039	-1.62996	0.1894	0.585344	no	OK	1.08793	2.01846	0.891667	0.782386	0.1187	0.46031	no	OK	0.147747	2.01846	3.77205	2.22391	0.16385	0.544133	no
XLOC_000887	CG43167	TSS1161	chr2L:11657409-11657992	0	0	0	0	0	0	0	0	0	0	0	0	NOTEST	0	0	0	0	1	1	no	NOTEST	0	0	0	0	1	1	no	NOTEST	0	0	0	0	1	1	no
XLOC_000888	CR44480	TSS1162	chr2L:11661689-11662404	0	0	0	0	0	0	0	0	0	0	0	0	NOTEST	0	0	0	0	1	1	no	NOTEST	0	0	0	0	1	1	no	NOTEST	0	0	0	0	1	1	no
XLOC_000889	CG44477	TSS1163	chr2L:11663258-11663872	0	0	0	0	0	0	0	0	0	0	0	0	NOTEST	0	0	0	0	1	1	no	NOTEST	0	0	0	0	1	1	no	NOTEST	0	0	0	0	1	1	no
XLOC_000890	CR44481	TSS1164	chr2L:11665240-11665810	0	0	0	0	0	0	0	0	0	0	0	0	NOTEST	0	0	0	0	1	1	no	NOTEST	0	0	0	0	1	1	no	NOTEST	0	0	0	0	1	1	no
XLOC_000891	CG4988	TSS1165	chr2L:11694803-11696107	0	0	0	0	0	0	0	0	0	0	0	0	NOTEST	0	0	0	0	1	1	no	NOTEST	0	0	0	0	1	1	no	NOTEST	0	0	0	0	1	1	no
XLOC_000892	CR44143	TSS1166	chr2L:11721285-11722098	0	0	0	0	0	0	0	0	0	0	0	0.030516	NOTEST	0.00762901	0	#NAME?	0	1	1	no	NOTEST	0.00762901	0	#NAME?	0	1	1	no	NOTEST	0	0	0	0	1	1	no
XLOC_000893	CR44145	TSS1167	chr2L:11736401-11737541	12.5513	10.1604	1.90073	2.78146	2.83946	2.95146	2.43699	2.72007	2.63049	2.20601	1.63671	2.11783	OK	2.14776	6.84847	1.67295	1.75406	0.0006	0.0102591	yes	OK	2.14776	2.73699	0.349758	0.337476	0.48445	0.860662	no	OK	6.84847	2.73699	-1.32319	-1.42481	0.0077	0.0726185	no
XLOC_000894	Vha100-5	TSS1168	chr2L:11738947-11744524	2.88428	2.31701	12.2327	1.83802	2.53728	2.87584	1.4215	4.84501	1.48263	0.839651	5.29538	1.1619	OK	2.19489	4.818	1.13429	1.43769	0.00565	0.0585518	no	OK	2.19489	2.91991	0.411774	0.515742	0.3027	0.719139	no	OK	4.818	2.91991	-0.722511	-0.993632	0.04555	0.254993	no
XLOC_000895	CG14931	TSS1169,TSS1170	chr2L:11788333-11789475	0	0	0	0.0561662	0	0.057836	0	0.122038	0	0	0.0412796	0.0794233	NOTEST	0.0301757	0.0140415	-1.10369	0	1	1	no	NOTEST	0.0301757	0.0449686	0.575529	0	1	1	no	NOTEST	0.0140415	0.0449686	1.67922	0	1	1	no
XLOC_000896	CG14932	TSS1171	chr2L:11789918-11791011	0	0	0.19829	0	0	0.0716951	0.0578981	0.0432562	0	0	0.203796	0.163669	NOTEST	0.0918661	0.0495725	-0.889994	0	1	1	no	NOTEST	0.0918661	0.0432124	-1.08809	0	1	1	no	NOTEST	0.0495725	0.0432124	-0.198095	0	1	1	no
XLOC_000897	CG45011	TSS1172	chr2L:11814155-11928572	0	0	0	0	0	0	0	0	0	0	0	0	NOTEST	0	0	0	0	1	1	no	NOTEST	0	0	0	0	1	1	no	NOTEST	0	0	0	0	1	1	no
XLOC_000898	CG45012	TSS1173	chr2L:11814155-11928572	0	0	0	0	0	0	0	0	0	0	0	0	NOTEST	0	0	0	0	1	1	no	NOTEST	0	0	0	0	1	1	no	NOTEST	0	0	0	0	1	1	no
XLOC_000899	CR45013	TSS1174	chr2L:11814155-11928572	3.62448	1.02947	0.759201	0.897352	0.943667	1.14341	0.832741	1.30435	0.580526	0.390815	0.511542	0.330149	OK	0.453258	1.57763	1.79935	0.376251	0.3474	0.762483	no	OK	0.453258	1.05604	1.22026	0.231134	0.4202	0.821823	no	OK	1.57763	1.05604	-0.579089	-0.142762	0.7419	0.961487	no
XLOC_000900	Sfp33A4	TSS1175	chr2L:11814155-11928572	0	0	0	0	0	0	0	0	0	0	0	0	NOTEST	0	0	0	0	1	1	no	NOTEST	0	0	0	0	1	1	no	NOTEST	0	0	0	0	1	1	no
XLOC_000901	Sfp33A2	TSS1176	chr2L:11814155-11928572	0	0	0	0	0	0	0	0	0	0	0.17331	0	NOTEST	0.0433275	0	#NAME?	0	1	1	no	NOTEST	0.0433275	0	#NAME?	0	1	1	no	NOTEST	0	0	0	0	1	1	no
XLOC_000902	Sfp33A3	TSS1177	chr2L:11814155-11928572	0	0	0.934567	0	0	0.522576	0.137196	1.2231	0	0	0.837805	0.311966	NOTEST	0.287443	0.233642	-0.298977	0	1	1	no	NOTEST	0.287443	0.470718	0.711589	0	1	1	no	NOTEST	0.233642	0.470718	1.01057	0	1	1	no
XLOC_000903	CG31704	TSS1178	chr2L:11814155-11928572	5.66025	0.742327	2.84077	0	0.324925	1.50302	1.39729	2.37969	0	0.469839	0.262334	0.679234	OK	0.352852	2.31084	2.71128	0.532346	0.28265	0.699126	no	OK	0.352852	1.40123	1.98956	0.353408	0.30095	0.716647	no	OK	2.31084	1.40123	-0.72172	-0.191046	0.7397	0.961029	no
XLOC_000904	CG14933,CG42486	TSS1179,TSS1180	chr2L:11814155-11928572	0	0	0	0	0.0838649	0.323316	0.203363	0.76555	0.343391	0.24415	0	0.77858	NOTEST	0.34153	0	#NAME?	0	1	1	no	NOTEST	0.34153	0.344023	0.0104938	0	1	1	no	NOTEST	0	0.344023	inf	0	1	1	no
XLOC_000905	Mal-B1	TSS1181	chr2L:11814155-11928572	0	0	0	0	0.101362	0.104233	0.021305	0.1435	0	0	0.131596	0.0480013	NOTEST	0.0448993	0	#NAME?	0	1	1	no	NOTEST	0.0448993	0.0925999	1.04432	0	1	1	no	NOTEST	0	0.0925999	inf	0	1	1	no
XLOC_000906	Mal-B2	TSS1182,TSS1183	chr2L:11814155-11928572	0	0.341346	0.410287	0.262731	0.610745	0.533897	0.199456	0.268338	0.691916	0.115522	0.035177	0.269485	NOTEST	0.278025	0.253591	-0.132711	0	1	1	no	NOTEST	0.278025	0.403109	0.535956	0	1	1	no	NOTEST	0.253591	0.403109	0.668667	0	1	1	no
XLOC_000907	CG42751	TSS1184	chr2L:11814155-11928572	0	0	0	0	0	0	0	0	0	0	0	0	NOTEST	0	0	0	0	1	1	no	NOTEST	0	0	0	0	1	1	no	NOTEST	0	0	0	0	1	1	no
XLOC_000908	Or33a	TSS1185	chr2L:11934504-11935716	0	0	0	0	0	0	0.0360653	0.0539674	0	0	0	0	NOTEST	0	0	0	0	1	1	no	NOTEST	0	0.0225082	inf	0	1	1	no	NOTEST	0	0.0225082	inf	0	1	1	no
XLOC_000909	Or33b	TSS1186	chr2L:11936180-11937501	0	0	0	0	0	0	0	0	0	0	0	0	NOTEST	0	0	0	0	1	1	no	NOTEST	0	0	0	0	1	1	no	NOTEST	0	0	0	0	1	1	no
XLOC_000910	Or33c	TSS1187	chr2L:11937968-11939202	0	0	0	0	0	0	0	0	0	0	0	0	NOTEST	0	0	0	0	1	1	no	NOTEST	0	0	0	0	1	1	no	NOTEST	0	0	0	0	1	1	no
XLOC_000911	Cry	TSS1188	chr2L:11944128-11947131	0.352166	0.0819796	0	0.0244565	0.25892	0.0499225	0.244814	2.13912	0	0.165657	0	0.275962	NOTEST	0.110405	0.114651	0.0544424	0	1	1	no	OK	0.110405	0.673194	2.60822	1.3565	0.1917	0.58899	no	OK	0.114651	0.673194	2.55378	1.32142	0.18435	0.576998	no
XLOC_000912	CG16964	TSS1189	chr2L:11947940-11948803	0	0	0	0	0	0	0	0	0	0	0	0	NOTEST	0	0	0	0	1	1	no	NOTEST	0	0	0	0	1	1	no	NOTEST	0	0	0	0	1	1	no
XLOC_000913	CG16965	TSS1190	chr2L:11981590-11988039	0.709755	0	1.46832	0.0197244	0.182467	0.72389	0.246776	0.542371	0.0286919	0	0.610518	0.0279272	OK	0.166784	0.54945	1.72001	0.341288	0.65925	0.938045	no	NOTEST	0.166784	0.423876	1.34566	0	1	1	no	OK	0.54945	0.423876	-0.374346	-0.0978829	0.8626	0.983064	no
XLOC_000914	CG34163	TSS1191	chr2L:11988269-11989882	4.41327	4.69346	14.5434	11.8535	25.9672	26.0406	24.7919	16.3038	20.5302	22.154	17.7147	16.2154	OK	19.1536	8.8759	-1.10965	-1.06679	0.04	0.232802	no	OK	19.1536	23.2759	0.28122	0.30337	0.5367	0.890497	no	OK	8.8759	23.2759	1.39087	1.30509	0.01295	0.105966	no
XLOC_000915	dgt2,escl	TSS1192,TSS1193	chr2L:11989935-11992848	9.07939	11.6539	12.4383	13.7825	16.6498	19.7853	21.5259	14.7775	18.2407	13.9549	13.4629	15.6577	OK	15.329	11.7385	-0.385018	-0.565527	0.25735	0.670624	no	OK	15.329	18.1846	0.246451	0.394434	0.42415	0.823863	no	OK	11.7385	18.1846	0.631469	0.958405	0.06175	0.311503	no
XLOC_000916	Ada1-2	TSS1194	chr2L:11992901-11995432	0	1.76895	2.60083	1.36376	1.6339	2.10012	1.25175	2.12825	1.85192	0.882819	1.87258	1.37013	OK	1.49436	1.43338	-0.0601046	-0.0420391	0.93805	0.992823	no	OK	1.49436	1.7785	0.251133	0.195476	0.7017	0.951298	no	OK	1.43338	1.7785	0.311238	0.22548	0.67855	0.944591	no
XLOC_000917	Qtzl	TSS1195	chr2L:11995739-11996723	3.18865	2.03623	0.869045	1.80356	3.32185	2.13539	2.46458	1.13697	1.64918	2.16685	2.05926	1.81543	OK	1.92268	1.97437	0.0382736	0.0316266	0.9545	0.993526	no	OK	1.92268	2.2647	0.236197	0.19335	0.7234	0.957519	no	OK	1.97437	2.2647	0.197924	0.167309	0.7586	0.964714	no
XLOC_000918	Ada1-1	TSS1196	chr2L:11996808-11999340	0	0	0	0	0.123847	0.191036	0.388085	0.395567	0.0676523	0.903395	0.665904	0.52572	OK	0.540668	0	#NAME?	#NAME?	0.05405	0.286177	no	OK	0.540668	0.274634	-0.977233	-0.334511	0.6663	0.940688	no	NOTEST	0	0.274634	inf	0	1	1	no
XLOC_000919	CG12264	TSS1197	chr2L:11999653-12002266	24.4826	16.4006	13.6705	19.1262	26.8225	26.0311	23.9847	20.6267	29.3453	26.8957	18.3621	28.7542	OK	25.8393	18.42	-0.488294	-0.894538	0.0771	0.354625	no	OK	25.8393	24.3663	-0.0846813	-0.164126	0.74365	0.961966	no	OK	18.42	24.3663	0.403613	0.746181	0.1402	0.503729	no
XLOC_000920	Rh5	TSS1198,TSS1199	chr2L:12008152-12009832	2.05172	0.0727417	0.61616	0.0597997	0.198138	0.0305625	0.178059	0.266554	0.155248	0.0868726	0.440337	0.140632	OK	0.205772	0.700105	1.76652	0.914635	0.10275	0.423472	no	NOTEST	0.205772	0.168328	-0.28977	0	1	1	no	OK	0.700105	0.168328	-2.05629	-1.06793	0.0657	0.32395	no
XLOC_000921	CR44588	TSS1200	chr2L:12013527-12013899	0	0	0	0	0	0	0	0	0	0	0	0	NOTEST	0	0	0	0	1	1	no	NOTEST	0	0	0	0	1	1	no	NOTEST	0	0	0	0	1	1	no
XLOC_000922	dmGlut	TSS1201	chr2L:12027437-12034122	0	1.51983	3.52008	0.186272	0.2707	0.265724	0.326263	0.698372	0.270957	0.522183	1.52365	0.498931	OK	0.703931	1.30654	0.892252	0.767784	0.12295	0.469414	no	OK	0.703931	0.390265	-0.85098	-0.654482	0.19055	0.587285	no	OK	1.30654	0.390265	-1.74323	-1.36464	0.01235	0.102373	no
XLOC_000923	CG18788	TSS1202	chr2L:12034189-12038511	1.1094	0.104892	0.710564	0.539243	1.42767	0.996231	0.942476	0.86623	0.971241	0.646147	0.945689	1.19528	OK	0.939588	0.616025	-0.609039	-0.255508	0.65095	0.935031	no	OK	0.939588	1.05815	0.171447	0.0796505	0.8837	0.985491	no	OK	0.616025	1.05815	0.780486	0.326367	0.64155	0.932941	no
XLOC_000924	CR44589	TSS1203	chr2L:12046441-12046679	0	10.2666	0.961526	2.55537	2.34215	0.609303	0.426986	2.84295	0	1.09416	3.29555	1.00075	OK	1.34761	3.44588	1.35447	0.867258	0.2646	0.677368	no	OK	1.34761	1.55535	0.206829	0.0972152	0.61995	0.925113	no	OK	3.44588	1.55535	-1.14764	-0.577051	0.24625	0.660655	no
XLOC_000925	CG14945	TSS1204,TSS1205	chr2L:12049417-12056042	0.98759	1.07074	1.0392	1.48804	1.60551	1.05465	1.27141	0.895812	2.87723	1.2103	1.08317	1.67157	OK	1.71057	1.14639	-0.577374	-0.234543	0.8362	0.979177	no	OK	1.71057	1.20685	-0.503234	-0.192799	0.83525	0.978887	no	OK	1.14639	1.20685	0.0741396	0.0285288	0.97	0.995703	no
XLOC_000926	CG34164,RpL7-like	TSS1206,TSS1207	chr2L:12056325-12058251	150.476	126.508	232.247	205.787	192.415	209.142	190.703	213.637	208.977	263.284	240.519	257.72	OK	242.625	178.755	-0.440748	-1.16094	0.01905	0.139848	no	OK	242.625	201.474	-0.268132	-0.715006	0.15185	0.522669	no	OK	178.755	201.474	0.172616	0.452572	0.3619	0.774288	no
XLOC_000927	CG14947	TSS1208	chr2L:12076099-12077739	0	0	0	0	0	0	0.0402766	0	0	0	0	0	NOTEST	0	0	0	0	1	1	no	NOTEST	0	0.0100692	inf	0	1	1	no	NOTEST	0	0.0100692	inf	0	1	1	no
XLOC_000928	CR44591	TSS1209	chr2L:12079603-12080568	0	0	0	0	0	0	0	0	0	0	0	0.0247235	NOTEST	0.00618087	0	#NAME?	0	1	1	no	NOTEST	0.00618087	0	#NAME?	0	1	1	no	NOTEST	0	0	0	0	1	1	no
XLOC_000929	CR44592	TSS1210	chr2L:12082994-12086413	0	0	0	0	0	0	0	0	0	0	0	0	NOTEST	0	0	0	0	1	1	no	NOTEST	0	0	0	0	1	1	no	NOTEST	0	0	0	0	1	1	no
XLOC_000930	CR44593	TSS1211	chr2L:12086620-12088025	0	0	0	0	0	0	0	0	0	0	0	0.047868	NOTEST	0.011967	0	#NAME?	0	1	1	no	NOTEST	0.011967	0	#NAME?	0	1	1	no	NOTEST	0	0	0	0	1	1	no
XLOC_000931	Pex19	TSS1212,TSS1213	chr2L:12091821-12096511	44.5261	42.756	45.8736	51.3351	50.7085	46.2735	45.9979	37.1148	44.5213	45.3829	40.3036	46.0167	OK	44.0561	46.1227	0.0661341	0.115024	0.81385	0.975275	no	OK	44.0561	45.0237	0.0313406	0.056174	0.90555	0.988318	no	OK	46.1227	45.0237	-0.0347935	-0.0635085	0.8955	0.987025	no
XLOC_000932	Mt2	TSS1214	chr2L:12096524-12097687	0.984499	0.465498	3.08147	1.59104	1.41383	1.68008	3.18567	1.19181	1.38892	3.13576	2.67509	2.14007	OK	2.33496	1.53063	-0.609276	-0.567896	0.25795	0.67127	no	OK	2.33496	1.86785	-0.322023	-0.285434	0.5597	0.901921	no	OK	1.53063	1.86785	0.287253	0.24857	0.6139	0.922429	no
XLOC_000933	Ced-12	TSS1215	chr2L:12097837-12103285	6.06953	12.2769	10.9433	11.7439	10.8454	12.3877	14.8738	13.0792	11.7428	13.2501	12.0656	12.5648	OK	12.4058	10.2584	-0.274211	-0.545286	0.26695	0.680341	no	OK	12.4058	12.7965	0.0447347	0.0932808	0.84675	0.981132	no	OK	10.2584	12.7965	0.318945	0.634502	0.19745	0.597169	no
XLOC_000934	Aats-thr	TSS1216,TSS1217	chr2L:12103750-12107170	184.648	187.475	159.063	146.372	149.201	189.011	143.524	141.651	195.009	229.797	162.321	175.238	OK	190.591	169.39	-0.170138	-0.472047	0.34285	0.758364	no	OK	190.591	155.846	-0.290357	-0.803837	0.11185	0.444218	no	OK	169.39	155.846	-0.120219	-0.332344	0.5121	0.878925	no
XLOC_000935	Phae1	TSS1218	chr2L:12109416-12110664	2.51943	0.794066	3.62757	0.504535	0	0.994242	0.485712	1.21164	0.056464	0	6.6262	0.621095	OK	1.82594	1.8614	0.027749	0.0225131	0.9632	0.994712	no	OK	1.82594	0.672898	-1.44018	-1.04605	0.0381	0.226676	no	OK	1.8614	0.672898	-1.46793	-1.12573	0.02185	0.154805	no
XLOC_000936	Phae2	TSS1219	chr2L:12111109-12112256	0	0	2.12168	0.213926	0.626038	3.55522	0.571189	3.12513	0.0622488	0.33221	6.79923	0.684926	OK	1.96965	0.583901	-1.75415	-1.10943	0.03355	0.207858	no	OK	1.96965	1.96939	-0.000190304	-0.00015125	0.99425	0.998571	no	OK	0.583901	1.96939	1.75396	1.17869	0.02525	0.171426	no
XLOC_000937	CG17211	TSS1220	chr2L:12114359-12129896	0	0.0859665	0.185378	0.0844189	0.166814	0.197283	0.0492797	0.0791565	0.135067	0.268839	0.0684768	0.142692	NOTEST	0.153769	0.0889408	-0.789845	0	1	1	no	NOTEST	0.153769	0.123133	-0.320539	0	1	1	no	NOTEST	0.0889408	0.123133	0.469306	0	1	1	no
XLOC_000938	Gr33a	TSS1221	chr2L:12138007-12140392	0	0	0	0	0	0	0	0	0	0	0	0.0808196	NOTEST	0.0202049	0	#NAME?	0	1	1	no	NOTEST	0.0202049	0	#NAME?	0	1	1	no	NOTEST	0	0	0	0	1	1	no
XLOC_000939	CG17217,CG31760,ZnT33D	TSS1222,TSS1223,TSS1224,TSS1225	chr2L:12142779-12172586	0	0	0.0190246	0.271199	0.0788892	0.0608423	0.168099	0.0999774	0.116099	0.00960952	0.15386	0.0904237	NOTEST	0.0924981	0.0725559	-0.350332	0	1	1	no	NOTEST	0.0924981	0.101952	0.140393	0	1	1	no	NOTEST	0.0725559	0.101952	0.490725	0	1	1	no
XLOC_000940	CG31861	TSS1226	chr2L:12142779-12172586	0	0	0	0	0	0	0	0	0	0	0	0	NOTEST	0	0	0	0	1	1	no	NOTEST	0	0	0	0	1	1	no	NOTEST	0	0	0	0	1	1	no
XLOC_000941	crok	TSS1227	chr2L:12172980-12174638	1.57219	4.26234	3.18267	1.78997	3.6094	3.42974	3.63321	2.20426	3.66019	3.99484	3.94926	2.89412	OK	3.6246	2.70179	-0.423905	-0.434717	0.3714	0.782734	no	OK	3.6246	3.21916	-0.17114	-0.173827	0.72865	0.958682	no	OK	2.70179	3.21916	0.252765	0.24462	0.6262	0.927441	no
XLOC_000942	aret	TSS1228,TSS1229,TSS1230,TSS1231,TSS1232,TSS1233	chr2L:12175003-12313438	0	0	0.0909691	0	0.0260359	0.134909	0.113349	0.0615576	0	0.0998147	0.109953	0.0747517	NOTEST	0.0711298	0.0227423	-1.64508	0	1	1	no	NOTEST	0.0711298	0.0839629	0.239298	0	1	1	no	NOTEST	0.0227423	0.0839629	1.88437	0	1	1	no
XLOC_000943	CG31759	TSS1234,TSS1235	chr2L:12175003-12313438	1.45884	2.06826	3.37555	3.48814	3.08841	3.21911	3.64618	3.66784	5.06011	4.46197	4.16951	5.47314	OK	4.79118	2.5977	-0.883147	-1.20041	0.02115	0.151268	no	OK	4.79118	3.40538	-0.492565	-0.700487	0.16175	0.541069	no	OK	2.5977	3.40538	0.390582	0.502615	0.3167	0.733288	no
XLOC_000944	CG31862	TSS1236	chr2L:12338847-12339477	0	0	0.0856238	0	0	0	0.0750928	0	0	0	0	0	NOTEST	0	0.021406	inf	0	1	1	no	NOTEST	0	0.0187732	inf	0	1	1	no	NOTEST	0.021406	0.0187732	-0.189337	0	1	1	no
XLOC_000945	bru-2	TSS1237,TSS1238,TSS1239,TSS1240,TSS1241	chr2L:12343642-12397528	60.0192	60.821	71.9564	49.9124	68.4081	61.0554	52.4431	85.2936	44.5788	51.1469	57.6122	43.5452	OK	49.2208	60.6772	0.301887	0.779493	0.1255	0.474968	no	OK	49.2208	66.8	0.44058	1.1531	0.02335	0.162299	no	OK	60.6772	66.8	0.138693	0.357051	0.48015	0.858207	no
XLOC_000946	CG17010	TSS1242	chr2L:12343642-12397528	0.971552	0.482284	0.0643221	0.37066	0.312952	1.27575	0.281118	0.6103	0.29413	0.587794	0.471397	0.285368	OK	0.409672	0.472204	0.204941	0.0297747	0.886	0.986232	no	OK	0.409672	0.620031	0.597869	0.0897073	0.66845	0.941263	no	OK	0.472204	0.620031	0.392928	0.0587421	0.8011	0.973334	no
XLOC_000947	Pkd2	TSS1243	chr2L:12398273-12402023	1.31671	0.635987	0.401459	0.366294	0.930674	0.538359	0.486519	0.80549	0.414399	0.353785	0.460029	0.356855	OK	0.396267	0.680113	0.779301	0.650747	0.1949	0.59366	no	OK	0.396267	0.690261	0.800668	0.715656	0.1387	0.500695	no	OK	0.680113	0.690261	0.0213673	0.0190374	0.9687	0.995471	no
XLOC_000948	CG6405	TSS1244	chr2L:12424903-12426440	2.34998	4.73996	1.48527	5.03352	1.92319	2.18774	2.50759	1.89947	2.52879	1.96606	2.13231	2.60728	OK	2.30861	3.40218	0.559436	0.578783	0.2489	0.662966	no	OK	2.30861	2.1295	-0.116509	-0.11446	0.82275	0.977029	no	OK	3.40218	2.1295	-0.675945	-0.703897	0.1574	0.532789	no
XLOC_000949	CG6388	TSS1245	chr2L:12428027-12430892	12.3975	14.4273	19.8121	15.5851	14.2486	17.8901	19.7879	15.6159	23.6736	27.7961	20.479	19.2008	OK	22.7874	15.5555	-0.550812	-1.1468	0.0223	0.156944	no	OK	22.7874	16.8856	-0.432441	-0.914812	0.0646	0.320848	no	OK	15.5555	16.8856	0.118371	0.239128	0.6275	0.928214	no
XLOC_000950	Elf	TSS1246,TSS1247,TSS1248	chr2L:12431074-12441279	72.935	71.3361	61.672	68.9209	79.0125	86.7834	82.9128	67.8296	77.6686	90.2342	71.3408	78.5031	OK	79.4367	68.716	-0.209159	-0.480029	0.33945	0.756201	no	OK	79.4367	79.1346	-0.00549629	-0.0126587	0.9789	0.996794	no	OK	68.716	79.1346	0.203663	0.469214	0.36035	0.773293	no
XLOC_000951	Oatp33Eb	TSS1249	chr2L:12448483-12453242	31.6716	24.29	26.4055	13.3338	30.0311	25.2422	20.9062	32.4726	16.3054	17.5424	17.3303	19.9913	OK	17.7924	23.9252	0.427275	0.994043	0.04825	0.265333	no	OK	17.7924	27.163	0.610385	1.44376	0.00475	0.0512281	no	OK	23.9252	27.163	0.18311	0.43857	0.37775	0.788442	no
XLOC_000952	CR43051	TSS1250	chr2L:12455539-12546611	441.265	497.296	239.328	261.588	123.211	122.939	105.325	163.517	132.636	141.642	163.516	117.432	OK	138.806	359.869	1.3744	0.612565	0.5249	0.884766	no	OK	138.806	128.748	-0.108523	-0.046254	0.8392	0.979905	no	OK	359.869	128.748	-1.48292	-0.69257	0.498	0.870842	no
XLOC_000953	CR42746	TSS1251	chr2L:12455539-12546611	0	0	0	0.633439	0	0.457621	0.105802	0.674923	0.737446	0	0.559971	0.569983	NOTEST	0.46685	0.15836	-1.55975	0	1	1	no	NOTEST	0.46685	0.309586	-0.592617	0	1	1	no	NOTEST	0.15836	0.309586	0.967136	0	1	1	no
XLOC_000954	CR44595,CR44596	TSS1252,TSS1253	chr2L:12581444-12583550	0	0	0	0	0	0	0	0.164329	0	0	0	0	NOTEST	0	0	0	0	1	1	no	NOTEST	0	0.0410823	inf	0	1	1	no	NOTEST	0	0.0410823	inf	0	1	1	no
XLOC_000955	nub	TSS1254,TSS1255,TSS1256	chr2L:12587624-12646356	5.80184	1.85032	5.11663	2.0176	1.46127	1.74366	1.54574	3.2774	0.990232	0.733372	2.16106	1.46077	OK	1.33636	3.6966	1.46789	1.82882	0.00095	0.0147702	yes	OK	1.33636	2.00702	0.586746	0.687047	0.17005	0.55328	no	OK	3.6966	2.00702	-0.881144	-1.20671	0.01905	0.139848	no
XLOC_000956	pdm2	TSS1257,TSS1258,TSS1259,TSS1260	chr2L:12657164-12686306	0	0.342646	0.681709	0.272872	0.716093	0.449443	0.227602	1.02877	0.396935	0.223283	0.17012	0.335381	NOTEST	0.28143	0.324307	0.204585	0	1	1	no	OK	0.28143	0.605477	1.1053	0.784554	0.1094	0.438565	no	OK	0.324307	0.605477	0.900713	0.635916	0.3507	0.764916	no
XLOC_000957	CG6153	TSS1261	chr2L:12692992-12694988	8.47056	12.0215	15.9045	13.5537	18.9084	18.9869	21.8288	18.5783	19.7268	14.8933	16.419	14.673	OK	16.428	12.4876	-0.395667	-0.553232	0.261	0.67425	no	OK	16.428	19.5756	0.252899	0.386026	0.4331	0.830149	no	OK	12.4876	19.5756	0.648566	0.930229	0.0583	0.30105	no
XLOC_000958	PICK1	TSS1262,TSS1263,TSS1264	chr2L:12695032-12698917	10.1713	8.08205	6.99872	6.53091	9.66608	6.99361	7.46022	11.4075	4.92238	2.31322	5.45554	5.04869	OK	4.43496	7.94575	0.841263	1.09366	0.03815	0.226879	no	OK	4.43496	8.88186	1.00194	1.31157	0.0158	0.123026	no	OK	7.94575	8.88186	0.160679	0.264891	0.59365	0.915421	no
XLOC_000959	spict	TSS1265	chr2L:12704724-12706683	45.9581	51.4754	19.7516	27.3574	105.883	107.619	99.5759	69.1739	92.0624	49.9317	46.7574	76.7012	OK	66.3632	36.1356	-0.876961	-2.06244	5e-05	0.00129868	yes	OK	66.3632	95.5629	0.526069	1.33482	0.0074	0.0706977	no	OK	36.1356	95.5629	1.40303	3.37867	5e-05	0.00129868	yes
XLOC_000960	CG6180	TSS1266	chr2L:12706798-12708680	92.0436	111.504	94.2068	115.751	101.174	107.095	109.704	80.8276	111.968	98.1975	84.4381	85.482	OK	95.0214	103.376	0.121581	0.307026	0.5401	0.891923	no	OK	95.0214	99.7003	0.0693447	0.174666	0.73015	0.958802	no	OK	103.376	99.7003	-0.0522358	-0.132204	0.7859	0.969688	no
XLOC_000961	MRP	TSS1267,TSS1268	chr2L:12713275-12744807	52.3359	52.9373	35.378	34.4525	43.1563	48.9857	40.8632	41.6317	34.4329	36.4658	32.1591	49.0988	OK	38.0392	43.7759	0.202652	0.414957	0.43175	0.82895	no	OK	38.0392	43.6592	0.198801	0.434421	0.39775	0.804681	no	OK	43.7759	43.6592	-0.00385172	-0.00833825	0.9869	0.997708	no
XLOC_000962	CR44970	TSS1269	chr2L:12840894-12841323	0	0	0	0	0	0	0	0	0	0	0	0	NOTEST	0	0	0	0	1	1	no	NOTEST	0	0	0	0	1	1	no	NOTEST	0	0	0	0	1	1	no
XLOC_000963	CR44971	TSS1270	chr2L:12841516-12841895	0	0	0	0	0	0	0	0	0	0	0	0	NOTEST	0	0	0	0	1	1	no	NOTEST	0	0	0	0	1	1	no	NOTEST	0	0	0	0	1	1	no
XLOC_000964	ACXB,ACXC	TSS1271,TSS1272	chr2L:12912529-12921008	0	0	0	0	0	0.0252752	0	0.0232954	0	0	0	0	NOTEST	0	0	0	0	1	1	no	NOTEST	0	0.0121426	inf	0	1	1	no	NOTEST	0	0.0121426	inf	0	1	1	no
XLOC_000965	ACXA	TSS1273	chr2L:12921090-12925453	0	0	0	0	0	0	0	0	0	0	0	0	NOTEST	0	0	0	0	1	1	no	NOTEST	0	0	0	0	1	1	no	NOTEST	0	0	0	0	1	1	no
XLOC_000966	ACXE	TSS1274	chr2L:12925610-12929823	0	0	0	0	0	0	0	0	0	0	0	0	NOTEST	0	0	0	0	1	1	no	NOTEST	0	0	0	0	1	1	no	NOTEST	0	0	0	0	1	1	no
XLOC_000967	CR44183	TSS1275	chr2L:12931550-12932340	0	0	0	0	0	0	0	0	0	0	0	0	NOTEST	0	0	0	0	1	1	no	NOTEST	0	0	0	0	1	1	no	NOTEST	0	0	0	0	1	1	no
XLOC_000968	CG16800	TSS1276	chr2L:12966589-12967810	0	0	0	0	0	0	0	0	0	0	0	0.0686018	NOTEST	0.0171505	0	#NAME?	0	1	1	no	NOTEST	0.0171505	0	#NAME?	0	1	1	no	NOTEST	0	0	0	0	1	1	no
XLOC_000969	Vha68-2	TSS1277,TSS1278,TSS1279,TSS1280	chr2L:12974321-12978607	144.573	164.954	163.959	189.253	116.092	121.003	132.441	124.149	126.122	136.87	153.312	148.106	OK	141.102	165.685	0.231696	0.642878	0.1946	0.593567	no	OK	141.102	123.421	-0.193154	-0.535565	0.27815	0.694417	no	OK	165.685	123.421	-0.42485	-1.17948	0.01885	0.138807	no
XLOC_000970	Vha68-3	TSS1281	chr2L:12978785-12981293	0.46511	1.055	0.88152	0.572641	1.24457	0.263502	0.26192	0.611768	0.779237	0.339265	0.63979	0.503454	OK	0.565437	0.743569	0.3951	0.334477	0.49315	0.867449	no	OK	0.565437	0.59544	0.0745903	0.0556629	0.9077	0.988609	no	OK	0.743569	0.59544	-0.32051	-0.241068	0.63865	0.931611	no
XLOC_000971	Tor	TSS1282	chr2L:13004479-13013197	8.96665	11.5061	11.8579	10.6623	11.127	12.8173	13.2293	12.8681	8.6025	10.9386	10.5015	10.9961	OK	10.2597	10.7482	0.0671154	0.169353	0.73915	0.960575	no	OK	10.2597	12.5104	0.286146	0.729876	0.1466	0.513225	no	OK	10.7482	12.5104	0.21903	0.559127	0.25885	0.671963	no
XLOC_000972	CR44197	TSS1283	chr2L:13089802-13090559	0	0	0	0	0	0	0	0.0441365	0	0	0	0	NOTEST	0	0	0	0	1	1	no	NOTEST	0	0.0110341	inf	0	1	1	no	NOTEST	0	0.0110341	inf	0	1	1	no
XLOC_000973	CR45447	TSS1284	chr2L:13096993-13097298	0	0	0	0	0	0	0	0.35931	0	0	0	0	NOTEST	0	0	0	0	1	1	no	NOTEST	0	0.0898274	inf	0	1	1	no	NOTEST	0	0.0898274	inf	0	1	1	no
XLOC_000974	CR45461	TSS1285	chr2L:13104679-13105220	0	0	0	0	0	0	0	0.20732	0	0	0	0	NOTEST	0	0	0	0	1	1	no	NOTEST	0	0.0518301	inf	0	1	1	no	NOTEST	0	0.0518301	inf	0	1	1	no
XLOC_000975	CG5142	TSS1286	chr2L:13106806-13109468	0.48457	0	0	0.0673171	0	0	0.0187112	0.252369	0	0	0	0	NOTEST	0	0.137972	inf	0	1	1	no	NOTEST	0	0.0677701	inf	0	1	1	no	NOTEST	0.137972	0.0677701	-1.02565	0	1	1	no
XLOC_000976	CG43050	TSS1287	chr2L:13119293-13120767	0	0	0	0	0	0	0	0	0	0	0	0	NOTEST	0	0	0	0	1	1	no	NOTEST	0	0	0	0	1	1	no	NOTEST	0	0	0	0	1	1	no
XLOC_000977	CG5122	TSS1288	chr2L:13130590-13134804	0	0	0	0	0	0.022309	0	0.00685702	0	0	0	0	NOTEST	0	0	0	0	1	1	no	NOTEST	0	0.0072915	inf	0	1	1	no	NOTEST	0	0.0072915	inf	0	1	1	no
XLOC_000978	CR44199	TSS1289	chr2L:13146635-13146908	0	0	0	0	0	0	0	0	0	0	0	0	NOTEST	0	0	0	0	1	1	no	NOTEST	0	0	0	0	1	1	no	NOTEST	0	0	0	0	1	1	no
XLOC_000979	Pk34A	TSS1290	chr2L:13158809-13160173	0	0.302246	0	0	0	0.0756696	0	0.115338	0.268721	0	0.706921	0.43463	NOTEST	0.352568	0.0755616	-2.22218	0	1	1	no	NOTEST	0.352568	0.0477518	-2.88428	0	1	1	no	NOTEST	0.0755616	0.0477518	-0.662098	0	1	1	no
XLOC_000980	CG5204	TSS1291	chr2L:13160526-13163153	0.964503	0.39068	0.347285	0.574543	1.51832	1.17103	0.878553	0.502607	1.0029	0.592469	1.04432	1.26898	OK	0.977167	0.569253	-0.779535	-0.688567	0.1463	0.512677	no	OK	0.977167	1.01763	0.0585356	0.05652	0.90635	0.988318	no	OK	0.569253	1.01763	0.838071	0.740943	0.11575	0.453665	no
XLOC_000981	Sir2	TSS1292	chr2L:13163208-13169551	62.5963	64.8556	52.6779	56.8112	67.9676	68.1128	66.101	55.7574	47.9622	42.4461	42.669	63.5845	OK	49.1655	59.2352	0.26881	0.630588	0.20515	0.608624	no	OK	49.1655	64.4847	0.391312	0.941731	0.05845	0.301498	no	OK	59.2352	64.4847	0.122501	0.290856	0.5539	0.899003	no
XLOC_000982	CG43925	TSS1293	chr2L:13169648-13176888	0	3.48692	0	0.547591	0	0	0	0	0	0	0.594906	0.262974	OK	0.21447	1.00863	2.23355	0.251922	0.37155	0.782782	no	NOTEST	0.21447	0	#NAME?	0	1	1	no	OK	1.00863	0	#NAME?	#NAME?	0.1312	0.486561	no
XLOC_000983	CG5439	TSS1294	chr2L:13177149-13178978	7.2848	10.8455	8.90584	9.86444	7.09754	8.52085	6.66717	7.06305	3.78984	9.74205	9.01724	7.52773	OK	7.51921	9.22514	0.294989	0.498648	0.30815	0.723967	no	OK	7.51921	7.33715	-0.0353615	-0.057874	0.90415	0.988309	no	OK	9.22514	7.33715	-0.33035	-0.560012	0.25015	0.663581	no
XLOC_000984	CG5287,CG5458	TSS1295,TSS1296	chr2L:13179246-13191979	13.2935	15.6234	13.6282	13.5103	11.3365	11.7096	13.3205	14.5782	13.8748	15.1634	13.9638	15.7797	OK	14.6954	14.0138	-0.0685136	-0.0677605	0.8937	0.987025	no	OK	14.6954	12.7362	-0.206432	-0.189755	0.7018	0.951367	no	OK	14.0138	12.7362	-0.137918	-0.124811	0.80655	0.973716	no
XLOC_000985	Edem2	TSS1297	chr2L:13192200-13203295	9.7889	13.0563	11.0089	9.73347	7.54472	7.88944	8.15962	8.93097	8.60532	10.1405	10.1031	8.30219	OK	9.28777	10.8969	0.230511	0.399577	0.4319	0.82896	no	OK	9.28777	8.13119	-0.191867	-0.322959	0.52235	0.883466	no	OK	10.8969	8.13119	-0.422378	-0.709963	0.1607	0.539303	no
XLOC_000986	Pect	TSS1298	chr2L:13203761-13211814	339.695	355.238	173.589	220.178	191.499	201.466	185.529	187.697	208.811	156.056	148.101	182.87	OK	173.959	272.175	0.645785	1.75533	0.00065	0.0109764	yes	OK	173.959	191.548	0.138952	0.382598	0.43745	0.832356	no	OK	272.175	191.548	-0.506833	-1.3787	0.00535	0.0562369	no
XLOC_000987	snRNA:U2:34ABb	TSS1299	chr2L:13215838-13216030	0	0	0	0	0	0	0	0	0	0	0	0	NOTEST	0	0	0	0	1	1	no	NOTEST	0	0	0	0	1	1	no	NOTEST	0	0	0	0	1	1	no
XLOC_000988	CG5705	TSS1300	chr2L:13219978-13222429	3.98528	3.90479	4.05962	3.58547	3.68993	3.0515	3.5224	3.26459	3.55869	6.49456	4.71171	2.88509	OK	4.41251	3.88379	-0.184136	-0.181649	0.71625	0.955612	no	OK	4.41251	3.3821	-0.383679	-0.371518	0.46195	0.847372	no	OK	3.88379	3.3821	-0.199543	-0.193152	0.6891	0.947524	no
XLOC_000989	CG16812	TSS1301	chr2L:13222586-13224545	7.88822	12.2069	15.5599	14.2253	16.7968	17.0978	16.9649	16.1841	12.5501	17.4618	16.1933	13.5692	OK	14.9436	12.4701	-0.261057	-0.499575	0.30785	0.723745	no	OK	14.9436	16.7609	0.165574	0.329395	0.51	0.878331	no	OK	12.4701	16.7609	0.426631	0.826183	0.0922	0.398105	no
XLOC_000990	CG16813	TSS1302,TSS1303	chr2L:13227528-13228521	0	1.72328	0.162787	0.456395	0.760341	0.0586326	0.0950222	0.379773	0.331339	0.0743095	0.782471	0.467295	OK	0.413854	0.585615	0.50083	0.253717	0.72045	0.956911	no	NOTEST	0.413854	0.323442	-0.355614	0	1	1	no	OK	0.585615	0.323442	-0.856444	-0.435801	0.5471	0.895891	no
XLOC_000991	CG16815	TSS1304	chr2L:13229831-13230549	0	0	0	0	0.305047	0	0	0.0944339	0	0	0.166775	0.0715024	NOTEST	0.0595693	0	#NAME?	0	1	1	no	NOTEST	0.0595693	0.0998703	0.745487	0	1	1	no	NOTEST	0	0.0998703	inf	0	1	1	no
XLOC_000992	Prosalpha6T	TSS1305	chr2L:13232038-13233058	0	0	0	0	0	0	0	0.091954	0	0	0	0	NOTEST	0	0	0	0	1	1	no	NOTEST	0	0.0229885	inf	0	1	1	no	NOTEST	0	0.0229885	inf	0	1	1	no
XLOC_000993	CG5867	TSS1306	chr2L:13236493-13239297	0	0	0	0	0	0.0981581	0.0398659	0.11928	0	0.23204	0.351372	0	NOTEST	0.145853	0	#NAME?	0	1	1	no	NOTEST	0.145853	0.0643259	-1.18104	0	1	1	no	NOTEST	0	0.0643259	inf	0	1	1	no
XLOC_000994	CG5945,CR45330	TSS1307,TSS1308,TSS1309	chr2L:13239988-13244724	0	0	0	0.325714	0	0	0	0	0	0.387159	0	0.160788	NOTEST	0.136987	0.0814285	-0.750431	0	1	1	no	NOTEST	0.136987	0	#NAME?	0	1	1	no	NOTEST	0.0814285	0	#NAME?	0	1	1	no
XLOC_000995	snRNA:U5:34A	TSS1310	chr2L:13244847-13244974	0	0	0	0	0	0	0	0	0	0	0	0	NOTEST	0	0	0	0	1	1	no	NOTEST	0	0	0	0	1	1	no	NOTEST	0	0	0	0	1	1	no
XLOC_000996	CG16820	TSS1311	chr2L:13246231-13250189	0	0	0.113943	0.0895724	0.356139	0	0.0747226	0.018649	0	0	0	0.0280864	NOTEST	0.00702161	0.0508788	2.85719	0	1	1	no	NOTEST	0.00702161	0.112378	4.00041	0	1	1	no	NOTEST	0.0508788	0.112378	1.14322	0	1	1	no
XLOC_000997	CG31728	TSS1312	chr2L:13251508-13257426	0	0	0	0.033605	0	0	0.0420419	0.0420001	0	0	0.0990675	0.0710507	NOTEST	0.0425295	0.00840124	-2.33979	0	1	1	no	NOTEST	0.0425295	0.0210105	-1.01735	0	1	1	no	NOTEST	0.00840124	0.0210105	1.32244	0	1	1	no
XLOC_000998	CG31851	TSS1313	chr2L:13257476-13258644	0	0	0	0	0	0	0	0.052309	0	0	0	0	NOTEST	0	0	0	0	1	1	no	NOTEST	0	0.0130772	inf	0	1	1	no	NOTEST	0	0.0130772	inf	0	1	1	no
XLOC_000999	CG44085	TSS1314,TSS1315,TSS1316	chr2L:13261007-13286538	177.313	184.271	110.741	173.072	62.439	81.3081	92.8315	129.81	98.2208	80.2294	101.12	113.064	OK	98.1586	161.349	0.717001	1.78785	0.00075	0.0122881	yes	OK	98.1586	91.5972	-0.0998103	-0.242844	0.63025	0.928882	no	OK	161.349	91.5972	-0.816811	-1.99757	0.00025	0.00508582	yes
XLOC_001000	CR44083	TSS1317	chr2L:13261007-13286538	5.16269	5.85691	5.28556	6.17699	3.25113	3.28892	5.17988	7.27823	6.3924	7.34154	9.11917	6.6054	OK	7.36463	5.62054	-0.389904	-0.127513	0.8411	0.980343	no	OK	7.36463	4.74954	-0.632826	-0.215912	0.76465	0.966401	no	OK	5.62054	4.74954	-0.242921	-0.0713346	0.88965	0.986298	no
XLOC_001001	Uvrag	TSS1318	chr2L:13286776-13289556	8.49118	8.49927	8.55965	9.38346	8.13965	10.1908	9.88755	10.0645	9.65186	9.81891	10.2789	9.54247	OK	9.82304	8.73339	-0.169627	-0.305441	0.53535	0.88996	no	OK	9.82304	9.57062	-0.0375567	-0.0701908	0.88695	0.98629	no	OK	8.73339	9.57062	0.13207	0.238252	0.6351	0.930782	no
XLOC_001002	CG31729	TSS1319,TSS1320,TSS1321,TSS1322	chr2L:13289996-13301668	161.988	172.904	90.278	93.6704	78.6601	80.588	70.6254	91.7873	77.9857	75.7647	70.8029	79.6741	OK	76.0568	129.71	0.770142	2.10048	5e-05	0.00129868	yes	OK	76.0568	80.4152	0.0803898	0.222956	0.6542	0.935942	no	OK	129.71	80.4152	-0.689752	-1.88144	0.0003	0.00585337	yes
XLOC_001003	CG16824	TSS1323	chr2L:13289996-13301668	8.173	2.14619	2.76539	0.513933	0	0.364659	0.286829	1.80944	0.499135	1.52959	0.124957	0.97818	OK	0.782966	3.39963	2.11836	0.174598	0.1938	0.592263	no	OK	0.782966	0.615233	-0.347816	-0.0237511	0.85105	0.981592	no	OK	3.39963	0.615233	-2.46617	-0.19791	0.2021	0.604084	no
XLOC_001004	CG16825	TSS1324	chr2L:13301813-13331121	0.477507	0	0.0563464	0	0.0389506	0	0.0123079	0.0184455	0.0429317	0	0.0326331	0.0485275	NOTEST	0.0310231	0.133463	2.10503	0	1	1	no	NOTEST	0.0310231	0.017426	-0.832099	0	1	1	no	NOTEST	0.133463	0.017426	-2.93713	0	1	1	no
XLOC_001005	CG16826	TSS1325	chr2L:13347772-13349020	0	0	0	0.534519	0.273334	8.80861	6.82706	0	0	0	51.0376	0.0387075	OK	12.7691	0.13363	-6.57827	-3.24153	0.30825	0.723967	no	OK	12.7691	3.97725	-1.68281	-1.67342	0.2582	0.671555	no	OK	0.13363	3.97725	4.89546	2.37692	0.2529	0.666307	no
XLOC_001006	CG6523	TSS1326	chr2L:13366446-13367410	83.0702	77.0052	81.5299	89.7314	92.2332	100.028	98.7996	85.0946	100.245	90.9027	79.4104	87.37	OK	89.482	82.8342	-0.111371	-0.269515	0.58015	0.910247	no	OK	89.482	94.0388	0.0716593	0.175081	0.7181	0.95632	no	OK	82.8342	94.0388	0.18303	0.444628	0.37185	0.783183	no
XLOC_001007	Tap42	TSS1327	chr2L:13367616-13369021	14.3799	13.2284	17.1041	19.2611	25.0464	21.892	22.695	16.4483	19.3956	19.3348	17.7744	18.415	OK	18.73	15.9934	-0.227874	-0.43042	0.39215	0.800093	no	OK	18.73	21.5204	0.20036	0.397303	0.42225	0.822909	no	OK	15.9934	21.5204	0.428235	0.821511	0.10075	0.41897	no
XLOC_001008	CG31855	TSS1328	chr2L:13369203-13371110	6.30475	10.8342	12.4471	9.69857	11.4534	11.0577	11.8525	13.1385	10.5356	13.4744	12.1959	12.5154	OK	12.1803	9.82116	-0.310589	-0.306856	0.55115	0.897997	no	OK	12.1803	11.8755	-0.0365609	-0.0382324	0.93895	0.992833	no	OK	9.82116	11.8755	0.274028	0.264485	0.60595	0.920161	no
XLOC_001009	CG6565	TSS1329,TSS1330	chr2L:13374018-13376404	2.66121	4.28439	6.09895	5.3413	8.89829	10.0026	9.88682	5.76643	8.29086	13.5007	7.39662	8.21886	OK	9.35175	4.59646	-1.02471	-1.64339	0.00175	0.0237733	yes	OK	9.35175	8.63852	-0.114452	-0.200879	0.68665	0.947089	no	OK	4.59646	8.63852	0.910261	1.43761	0.0052	0.0550035	no
XLOC_001010	beta'COP	TSS1331	chr2L:13378901-13382382	54.8777	66.4679	53.9851	60.4768	59.7394	63.6369	60.8677	56.2399	62.5961	54.9555	52.7145	60.6871	OK	57.7383	58.9519	0.0300093	0.0807996	0.8706	0.98459	no	OK	57.7383	60.121	0.0583397	0.157297	0.7504	0.963062	no	OK	58.9519	60.121	0.0283304	0.076384	0.87205	0.984791	no
XLOC_001011	loqs	TSS1332	chr2L:13382651-13385671	13.0064	7.20094	12.9433	10.4923	11.7041	11.6362	11.4645	16.133	9.87636	8.21986	7.67649	8.13706	OK	8.47744	10.9107	0.364048	0.555143	0.2741	0.689054	no	OK	8.47744	12.7345	0.587037	0.908076	0.07465	0.347998	no	OK	10.9107	12.7345	0.222989	0.357905	0.49085	0.865726	no
XLOC_001012	CG7099	TSS1333	chr2L:13387570-13395131	2.45595	3.10718	3.9653	3.57725	2.85305	3.67733	4.59773	3.9506	3.32913	3.90282	4.38981	3.42307	OK	3.7612	3.27642	-0.199074	-0.0573502	0.9077	0.988609	no	OK	3.7612	3.76968	0.00324686	0.00100783	0.9969	0.998924	no	OK	3.27642	3.76968	0.202321	0.062221	0.9092	0.988622	no
XLOC_001013	CG7110	TSS1334	chr2L:13398857-13411047	3.91752	4.38102	7.38145	4.65947	17.2769	18.5186	17.1267	10.6958	7.3962	6.88612	8.17588	5.26084	OK	6.92976	5.08487	-0.446595	-0.794651	0.1095	0.438843	no	OK	6.92976	15.9045	1.19856	2.46062	5e-05	0.00129868	yes	OK	5.08487	15.9045	1.64515	3.13401	5e-05	0.00129868	yes
XLOC_001014	CG16848	TSS1335	chr2L:13412518-13413716	0	0	0.620768	0.528858	2.3796	3.37841	2.30811	1.34615	0.355122	0.315764	0.598686	0.172359	NOTEST	0.360483	0.287406	-0.326838	0	1	1	no	OK	0.360483	2.35307	2.70654	1.65948	0.0111	0.0948687	no	OK	0.287406	2.35307	3.03338	2.00009	0.00215	0.0279217	yes
XLOC_001015	CG42784,CG43850	TSS1336,TSS1337,TSS1338,TSS1339	chr2L:13415430-13500427	11.257	9.73925	16.6696	11.1449	10.1178	10.835	8.22608	22.2917	13.1354	7.95915	16.1652	10.6432	OK	11.9757	12.2027	0.0270856	0.0497894	0.9219	0.990226	no	OK	11.9757	12.8676	0.103632	0.173706	0.73685	0.960305	no	OK	12.2027	12.8676	0.0765468	0.132927	0.79485	0.971559	no
XLOC_001016	Tehao	TSS1340	chr2L:13415430-13500427	0	0.232692	0.248966	0.0815114	0.0645859	0.215828	0.0815975	0.427901	0.094855	0.189031	0.156217	0.237436	NOTEST	0.169385	0.140792	-0.266736	0	1	1	no	NOTEST	0.169385	0.197478	0.221387	0	1	1	no	NOTEST	0.140792	0.197478	0.488123	0	1	1	no
XLOC_001017	CG42809	TSS1341	chr2L:13415430-13500427	0	0	0	0	0	0	0.0847699	0.315833	0	0	0	0	NOTEST	0	0	0	0	1	1	no	NOTEST	0	0.100151	inf	0	1	1	no	NOTEST	0	0.100151	inf	0	1	1	no
XLOC_001018	CG42810	TSS1342	chr2L:13415430-13500427	0	0	0	0.493228	0.671524	0	0	0	0	0	0	0.0584464	NOTEST	0.0146116	0.123307	3.07707	0	1	1	no	NOTEST	0.0146116	0.167881	3.52225	0	1	1	no	NOTEST	0.123307	0.167881	0.445185	0	1	1	no
XLOC_001019	CG33640	TSS1343	chr2L:13500623-13549328	1.63358	1.16029	0.213421	1.12163	0.152193	0.234694	0.374759	1.8158	1.79609	0.991282	0.574974	1.64643	OK	1.25219	1.03223	-0.278693	-0.0180609	0.82625	0.977342	no	OK	1.25219	0.644361	-0.958516	-0.0560212	0.5364	0.890257	no	OK	1.03223	0.644361	-0.679823	-0.0373552	0.66835	0.941214	no
XLOC_001020	CG33641	TSS1344	chr2L:13500623-13549328	2.18349	0.464893	0.21525	0.225965	0.202252	1.16972	1.19471	0.986261	1.31539	0.073506	0.331772	0.782288	OK	0.625739	0.772401	0.303788	0.0187307	0.855	0.981712	no	OK	0.625739	0.888237	0.505383	0.0334387	0.7337	0.959988	no	OK	0.772401	0.888237	0.201596	0.0136872	0.8949	0.987025	no
XLOC_001021	CG33642	TSS1345	chr2L:13500623-13549328	0	0.962815	0	0.155932	1.04756	2.01949	1.56216	1.84713	1.58853	2.05526	0.629492	1.28852	OK	1.39045	0.279687	-2.31367	-0.122012	0.26775	0.681046	no	OK	1.39045	1.61909	0.219627	0.0209314	0.85575	0.981712	no	OK	0.279687	1.61909	2.5333	0.134998	0.2258	0.638107	no
XLOC_001022	CG33643	TSS1346	chr2L:13500623-13549328	0	0	0.640264	1.57028	5.17457	3.40306	3.93497	4.05063	6.53122	1.98256	3.28556	3.4522	OK	3.81289	0.552635	-2.78649	-0.214223	0.1771	0.56531	no	OK	3.81289	4.14081	0.119028	0.0153578	0.92535	0.990915	no	OK	0.552635	4.14081	2.90551	0.226028	0.15675	0.531449	no
XLOC_001023	CG33644	TSS1347	chr2L:13500623-13549328	1.9489	0	0	0.26688	3.46151	0.702314	0.7805	0.664165	0	0.789077	0	0.88615	NOTEST	0.418807	0.553946	0.40346	0	1	1	no	OK	0.418807	1.40212	1.74326	0.0971181	0.3944	0.801643	no	OK	0.553946	1.40212	1.3398	0.0789537	0.53535	0.88996	no
XLOC_001024	CG33645	TSS1348	chr2L:13500623-13549328	0	0.483731	1.33349	0	0.317453	0.244765	0.39035	0.872707	0	0.229614	0.684187	0.60871	NOTEST	0.380628	0.454305	0.255283	0	1	1	no	OK	0.380628	0.456319	0.261662	0.0111361	0.8731	0.985167	no	OK	0.454305	0.456319	0.00637926	0.000300377	0.96485	0.994809	no
XLOC_001025	CG16852	TSS1349	chr2L:13500623-13549328	0	0	0	0	0	0.451937	0.0522367	0.0780845	0.455356	0	0.367875	0.147576	NOTEST	0.242702	0	#NAME?	0	1	1	no	NOTEST	0.242702	0.145565	-0.737525	0	1	1	no	NOTEST	0	0.145565	inf	0	1	1	no
XLOC_001026	CG16853	TSS1350,TSS1351	chr2L:13500623-13549328	0	0.228698	0.42656	0.87649	0.410249	0.45807	0.50004	0.465419	0.756908	0.108414	0.0274288	0.703783	NOTEST	0.399133	0.382937	-0.0597642	0	1	1	no	OK	0.399133	0.458444	0.199876	0.0139843	0.8742	0.985234	no	OK	0.382937	0.458444	0.25964	0.0188688	0.83525	0.978887	no
XLOC_001027	kuz,mir-2489	TSS1352,TSS1353	chr2L:13550138-13639411	194.293	215.056	151.837	142.709	88.7423	122.518	84.6443	139.273	136.518	171.338	166.187	164.018	OK	159.516	175.974	0.141662	0.389675	0.43565	0.83111	no	OK	159.516	108.794	-0.552095	-1.50583	0.0022	0.0284163	yes	OK	175.974	108.794	-0.693757	-1.87785	0.0003	0.00585337	yes
XLOC_001028	CR44973	TSS1354	chr2L:13550138-13639411	0	0	0	0	0	0	0.115907	0	0	0	0	0.592382	NOTEST	0.148095	0	#NAME?	0	1	1	no	NOTEST	0.148095	0.0289767	-2.35356	0	1	1	no	NOTEST	0	0.0289767	inf	0	1	1	no
XLOC_001029	CR44726	TSS1355	chr2L:13642820-13643230	0	0	0	0	0	0	0	0	0	0	0	0.118238	NOTEST	0.0295595	0	#NAME?	0	1	1	no	NOTEST	0.0295595	0	#NAME?	0	1	1	no	NOTEST	0	0	0	0	1	1	no
XLOC_001030	CG18507	TSS1356	chr2L:13665524-13672967	0.25974	0.716018	0.396751	0.162333	0.827489	0.625899	0.149754	0.480866	0.104966	0.069813	0.0686103	0.34802	NOTEST	0.147852	0.38371	1.37586	0	1	1	no	OK	0.147852	0.521002	1.81713	1.05113	0.0337	0.208246	no	OK	0.38371	0.521002	0.441272	0.304841	0.5574	0.900598	no
XLOC_001031	CG7311	TSS1357	chr2L:13676859-13717320	0	0	0	0	0	0	0	0	0	0	0	0.00926299	NOTEST	0.00231575	0	#NAME?	0	1	1	no	NOTEST	0.00231575	0	#NAME?	0	1	1	no	NOTEST	0	0	0	0	1	1	no
XLOC_001032	CG31813	TSS1358	chr2L:13736137-13737030	0	0	0	0	0	0	0	0	0	0	0	0	NOTEST	0	0	0	0	1	1	no	NOTEST	0	0	0	0	1	1	no	NOTEST	0	0	0	0	1	1	no
XLOC_001033	CR44846,TM9SF4	TSS1359,TSS1360	chr2L:13746951-13773905	27.3161	30.2695	28.5201	27.9743	25.9048	25.7174	27.3562	24.9998	23.1344	25.0723	27.4145	25.736	OK	25.3393	28.52	0.170595	0.414253	0.40495	0.810835	no	OK	25.3393	25.9945	0.0368311	0.0893487	0.85875	0.982051	no	OK	28.52	25.9945	-0.133764	-0.325691	0.51005	0.878331	no
XLOC_001034	CG43376	TSS1361	chr2L:13773996-13780165	0	0	0	0.88201	0	0.650267	0.491964	0	0	0	0	0.282728	NOTEST	0.0706819	0.220502	1.64138	0	1	1	no	NOTEST	0.0706819	0.285558	2.01437	0	1	1	no	NOTEST	0.220502	0.285558	0.372988	0	1	1	no
XLOC_001035	CR31845	TSS1362	chr2L:13773996-13780165	0	1.22461	0.170598	0.894972	0.159496	0.922485	0.597562	0.446694	0.0868193	0.522661	0.61386	0.534492	OK	0.439458	0.572545	0.381664	0.0704855	0.8397	0.980028	no	OK	0.439458	0.531559	0.274505	0.0504049	0.8739	0.985234	no	OK	0.572545	0.531559	-0.107159	-0.0208905	0.95625	0.993716	no
XLOC_001036	p38b	TSS1363	chr2L:13780688-13790562	19.7642	16.7102	28.1558	26.7115	24.7937	25.8683	26.67	25.1652	25.3627	27.8426	27.5937	27.2928	OK	27.023	22.8354	-0.242912	-0.346135	0.481	0.858654	no	OK	27.023	25.6243	-0.0766722	-0.116841	0.81335	0.975179	no	OK	22.8354	25.6243	0.16624	0.226192	0.6557	0.936298	no
XLOC_001037	CG31731	TSS1364	chr2L:13780688-13790562	11.4818	12.4614	10.1578	10.7409	14.4406	14.4114	16.79	13.0806	9.18289	10.7849	10.5076	12.3307	OK	10.7015	11.2104	0.0670274	0.111719	0.8223	0.977029	no	OK	10.7015	14.6806	0.456098	0.824721	0.09855	0.413849	no	OK	11.2104	14.6806	0.389071	0.680415	0.1679	0.549901	no
XLOC_001038	CG16863	TSS1365	chr2L:13790958-13793264	0.900459	0.995162	0.717634	0.930902	1.6386	0.704754	0.887176	1.61268	0.728085	0.605019	0.860504	0.637122	OK	0.707682	0.886039	0.324268	0.276298	0.58395	0.912059	no	OK	0.707682	1.2108	0.774791	0.71323	0.1566	0.531086	no	OK	0.886039	1.2108	0.450523	0.407514	0.42115	0.82236	no
XLOC_001039	Sec71	TSS1366	chr2L:13793520-13799674	12.5108	18.1651	14.5772	14.4247	10.7658	13.2282	13.4472	14.4026	11.304	14.8319	12.8708	14.5809	OK	13.3969	14.9195	0.155295	0.38902	0.4295	0.827071	no	OK	13.3969	12.9609	-0.0477319	-0.119018	0.80475	0.973334	no	OK	14.9195	12.9609	-0.203027	-0.507926	0.2962	0.711432	no
XLOC_001040	CAH1	TSS1367	chr2L:13803625-13811474	0	0	2.14438	0.325777	0.691351	0.166623	0.163068	1.22075	0.142181	0.126261	0.287813	0.597716	OK	0.288493	0.61754	1.098	0.417611	0.68165	0.94587	no	OK	0.288493	0.560449	0.958048	0.360159	0.57155	0.906794	no	OK	0.61754	0.560449	-0.139949	-0.0617662	0.92975	0.991108	no
XLOC_001041	CG16865	TSS1368	chr2L:13811521-13813316	12.5388	5.96458	9.75807	7.44101	10.9807	9.50325	12.0922	9.84468	10.3387	10.6616	10.5276	8.75523	OK	10.0708	8.92562	-0.174153	-0.230977	0.64365	0.933371	no	OK	10.0708	10.6052	0.0745965	0.103029	0.8409	0.980328	no	OK	8.92562	10.6052	0.248749	0.332127	0.51495	0.87986	no
XLOC_001042	Sos	TSS1369	chr2L:13813815-13819826	9.79736	15.3142	13.8377	13.3682	11.6095	13.1341	14.0845	14.628	9.13365	12.0515	12.8642	11.9811	OK	11.5076	13.0794	0.184704	0.453052	0.364	0.775957	no	OK	11.5076	13.364	0.215764	0.531756	0.2798	0.696047	no	OK	13.0794	13.364	0.03106	0.0769312	0.8795	0.98534	no
XLOC_001043	b	TSS1370	chr2L:13821247-13823979	0.569895	0.392529	0.237463	0.341967	0.621685	0.392308	0.26741	0.395927	0.197441	0.24804	0.749961	0.311415	NOTEST	0.376714	0.385463	0.0331228	0	1	1	no	NOTEST	0.376714	0.419332	0.154623	0	1	1	no	NOTEST	0.385463	0.419332	0.121501	0	1	1	no
XLOC_001044	Orc5	TSS1371	chr2L:13829836-13833105	2.19038	2.4847	3.48197	2.65409	2.85622	3.13483	4.70476	3.10853	2.93597	2.56949	2.97269	2.28819	OK	2.69159	2.70278	0.00599031	0.00444825	0.9925	0.998502	no	OK	2.69159	3.45109	0.358595	0.282252	0.5611	0.902572	no	OK	2.70278	3.45109	0.352605	0.273984	0.5754	0.908199	no
XLOC_001045	RpII33	TSS1372	chr2L:13833336-13835072	13.5634	17.4251	15.6588	17.6246	23.298	23.7059	27.0226	19.1019	24.3545	27.1694	20.2815	20.516	OK	23.0804	16.068	-0.522476	-0.784829	0.11585	0.453684	no	OK	23.0804	23.2821	0.0125541	0.0206352	0.96805	0.995384	no	OK	16.068	23.2821	0.53503	0.808844	0.0977	0.412215	no
XLOC_001046	CenG1A	TSS1373,TSS1374,TSS1375	chr2L:13835563-13898712	52.1498	49.8097	45.9104	42.435	59.6607	54.546	48.8494	67.6486	78.1399	55.3199	60.9053	69.4676	OK	65.9582	47.5762	-0.47131	-1.19307	0.0176	0.132395	no	OK	65.9582	57.6762	-0.193575	-0.514414	0.29845	0.713841	no	OK	47.5762	57.6762	0.277735	0.69737	0.15905	0.535776	no
XLOC_001047	CG7916	TSS1376	chr2L:13835563-13898712	0	0	1.58312	0.775031	0.44343	0.170991	1.10882	2.83261	0.483334	0.484608	0.122103	0.887129	OK	0.494293	0.589537	0.254214	0.0312032	0.8904	0.986298	no	OK	0.494293	1.13896	1.20428	0.153904	0.46865	0.851767	no	OK	0.589537	1.13896	0.950067	0.147638	0.66325	0.939487	no
XLOC_001048	CG7953	TSS1377	chr2L:13835563-13898712	4.74299	0	2.46273	0.297385	2.89514	0.139463	1.55008	5.68485	0.197677	0.0879096	0.133222	0.852795	OK	0.317901	1.87578	2.56084	0.323444	0.2605	0.673688	no	OK	0.317901	2.56738	3.01365	0.381537	0.1073	0.433731	no	OK	1.87578	2.56738	0.45281	0.123322	0.84395	0.980781	no
XLOC_001049	CG7968	TSS1378	chr2L:13835563-13898712	0	0	15.7741	0.238997	0.239605	0	0.199484	1.11831	0	0.116327	0	0.394397	OK	0.127681	4.00328	4.97057	0.40388	0.26385	0.676658	no	NOTEST	0.127681	0.389351	1.60853	0	1	1	no	OK	4.00328	0.389351	-3.36204	-0.429376	0.2889	0.70472	no
XLOC_001050	Ance	TSS1379,TSS1380	chr2L:13905644-13909212	3.13076	2.00917	28.7922	1.51087	4.14833	2.93576	5.30833	4.7912	1.96473	1.79372	5.24486	4.78124	OK	3.44614	8.86075	1.36245	1.84611	0.00025	0.00508582	yes	OK	3.44614	4.2959	0.317983	0.435549	0.3776	0.788333	no	OK	8.86075	4.2959	-1.04447	-1.48381	0.0026	0.032119	yes
XLOC_001051	Ance-2	TSS1381	chr2L:13909332-13911719	0	0	0.039073	0.0204708	0	0	0.034149	0.0127906	0	0.0197945	0	0.0192419	NOTEST	0.00975909	0.014886	0.609133	0	1	1	no	NOTEST	0.00975909	0.0117349	0.265988	0	1	1	no	NOTEST	0.014886	0.0117349	-0.343145	0	1	1	no
XLOC_001052	Acyp	TSS1382	chr2L:13912082-13912652	0	0	0	0	0	0	0	0	0	0	0	0	NOTEST	0	0	0	0	1	1	no	NOTEST	0	0	0	0	1	1	no	NOTEST	0	0	0	0	1	1	no
XLOC_001053	Ance-3	TSS1383	chr2L:13914724-13956188	0	0	0	0	0	0	0	0	0	0	0	0.00702747	NOTEST	0.00175687	0	#NAME?	0	1	1	no	NOTEST	0.00175687	0	#NAME?	0	1	1	no	NOTEST	0	0	0	0	1	1	no
XLOC_001054	NimA	TSS1384,TSS1385	chr2L:13957538-13963381	0	0	0	0	0	0	0	0	0	0	0	0.0097966	NOTEST	0.00244915	0	#NAME?	0	1	1	no	NOTEST	0.00244915	0	#NAME?	0	1	1	no	NOTEST	0	0	0	0	1	1	no
XLOC_001055	NimB1	TSS1386	chr2L:13963506-13967018	0	0	0.107161	0.11235	0	0	0	0	0	0	0	0.0352504	NOTEST	0.00881261	0.0548777	2.63858	0	1	1	no	NOTEST	0.00881261	0	#NAME?	0	1	1	no	NOTEST	0.0548777	0	#NAME?	0	1	1	no
XLOC_001056	NimB5	TSS1387,TSS1388	chr2L:13970176-13972947	0	0	0	0	0	0	0	0	0	0	0	0	NOTEST	0	0	0	0	1	1	no	NOTEST	0	0	0	0	1	1	no	NOTEST	0	0	0	0	1	1	no
XLOC_001057	Cyp28a5	TSS1389	chr2L:13977301-13979569	8.61279	5.04594	6.92249	1.91889	2.5406	2.28154	1.44718	4.38429	2.67673	1.47566	2.84601	3.8192	OK	2.7044	5.62502	1.05655	1.37091	0.0053	0.0558138	no	OK	2.7044	2.6634	-0.0220382	-0.0258376	0.9555	0.993716	no	OK	5.62502	2.6634	-1.07859	-1.3879	0.00415	0.0461661	yes
XLOC_001058	NimC2	TSS1390	chr2L:13980125-14001248	0	0	0.110721	0	0	0.0197032	0.0322522	0	0	0	0.0142452	0.0908635	NOTEST	0.0262772	0.0276802	0.0750438	0	1	1	no	NOTEST	0.0262772	0.0129888	-1.01654	0	1	1	no	NOTEST	0.0276802	0.0129888	-1.09158	0	1	1	no
XLOC_001059	CG42692	TSS1391	chr2L:14008100-14008820	0	0	0	0	0	0	0	0	0	0	0	0	NOTEST	0	0	0	0	1	1	no	NOTEST	0	0	0	0	1	1	no	NOTEST	0	0	0	0	1	1	no
XLOC_001060	CR44849,bgm	TSS1392,TSS1393,TSS1394	chr2L:14013003-14020325	0.131777	0.149457	0.786827	0.522878	0.774419	0.808235	0.89058	1.03691	0.106582	0.460404	0.890243	0.576115	OK	0.508336	0.397734	-0.353977	-0.244288	0.6014	0.91778	no	OK	0.508336	0.877535	0.787674	0.619445	0.18925	0.585295	no	OK	0.397734	0.877535	1.14165	0.93625	0.0556	0.291686	no
XLOC_001061	CG4500	TSS1395	chr2L:14027000-14031539	0	0	0.295339	0.0825238	0	0	0.0172081	0.0902343	0	0	0.0760056	0.0581779	NOTEST	0.0335459	0.0944656	1.49365	0	1	1	no	NOTEST	0.0335459	0.0268606	-0.320644	0	1	1	no	NOTEST	0.0944656	0.0268606	-1.8143	0	1	1	no
XLOC_001062	nAChRalpha5	TSS1396	chr2L:14040169-14094401	0.185822	0.249572	0.594034	0.286959	0.117014	0.210224	0.717958	0.34415	0.0273697	0.0362975	0.0867551	0.274072	NOTEST	0.106124	0.329097	1.63277	0	1	1	no	NOTEST	0.106124	0.347336	1.71059	0	1	1	no	NOTEST	0.329097	0.347336	0.0778216	0	1	1	no
XLOC_001063	NimC4	TSS1397	chr2L:14040169-14094401	0	0	0	0.075267	0.0499926	0	0.0941949	0	0.109502	0	0	0.141695	NOTEST	0.0627993	0.0188167	-1.73873	0	1	1	no	NOTEST	0.0627993	0.0360469	-0.800873	0	1	1	no	NOTEST	0.0188167	0.0360469	0.937857	0	1	1	no
XLOC_001064	CG16879	TSS1398	chr2L:14104482-14107461	0	0	0.0404798	0.0848409	0	0	0	0	0	0	0	0	NOTEST	0	0.0313302	inf	0	1	1	no	NOTEST	0	0	0	0	1	1	no	NOTEST	0.0313302	0	#NAME?	0	1	1	no
XLOC_001065	CG17341	TSS1399	chr2L:14134490-14160587	0.431171	0.177793	0.447782	0.065448	0.143797	0.0443634	0.00909688	0.252267	0	0.0315925	0.13672	0.0256129	NOTEST	0.0484814	0.280548	2.53275	0	1	1	no	NOTEST	0.0484814	0.112381	1.2129	0	1	1	no	NOTEST	0.280548	0.112381	-1.31985	0	1	1	no
XLOC_001066	CR44727	TSS1400	chr2L:14234753-14235156	0	0	0	0	0	0	0	0	0	0	0	0	NOTEST	0	0	0	0	1	1	no	NOTEST	0	0	0	0	1	1	no	NOTEST	0	0	0	0	1	1	no
XLOC_001067	CR44728	TSS1401	chr2L:14235317-14236307	0	0	0	0	0	0.052321	0.0424642	0.0952745	0	0	0	0	NOTEST	0	0	0	0	1	1	no	NOTEST	0	0.0475149	inf	0	1	1	no	NOTEST	0	0.0475149	inf	0	1	1	no
XLOC_001068	CR44216	TSS1402	chr2L:14241070-14241732	0	0.696138	0	0	0	0	0	0	0	0	0	0	NOTEST	0	0.174034	inf	0	1	1	no	NOTEST	0	0	0	0	1	1	no	NOTEST	0.174034	0	#NAME?	0	1	1	no
XLOC_001069	wb	TSS1403,TSS1404	chr2L:14263026-14328262	93.4294	120.306	87.3147	99.7857	35.8117	43.1371	41.7249	77.8285	63.4593	75.7159	90.2892	103.743	OK	83.3018	100.209	0.266594	0.73437	0.14075	0.504395	no	OK	83.3018	49.6255	-0.747264	-1.99822	5e-05	0.00129868	yes	OK	100.209	49.6255	-1.01386	-2.71866	5e-05	0.00129868	yes
XLOC_001070	CG32971	TSS1405,TSS1406	chr2L:14263026-14328262	1.87686	7.91564	1.4352	1.83236	0	0.669898	1.34812	0.891926	0.96923	0.506198	0.924713	1.22481	OK	0.906238	3.26501	1.84913	0.168703	0.15425	0.526924	no	OK	0.906238	0.727486	-0.316971	-0.0261732	0.8074	0.974145	no	OK	3.26501	0.727486	-2.1661	-0.227239	0.1496	0.518402	no
XLOC_001071	CR43639	TSS1407	chr2L:14263026-14328262	0	0	0	0	0	0	0.0903226	0.067343	0	0	0.397667	0.0874529	NOTEST	0.12128	0	#NAME?	0	1	1	no	NOTEST	0.12128	0.0394164	-1.62147	0	1	1	no	NOTEST	0	0.0394164	inf	0	1	1	no
XLOC_001072	ms(2)34Fe	TSS1408	chr2L:14328428-14333860	3.2818	2.08171	1.72701	2.33347	0.393254	0.514715	0.460095	0.785857	1.09189	1.00384	1.32718	1.58406	OK	1.25174	2.356	0.912402	1.29537	0.01015	0.0887365	no	OK	1.25174	0.53848	-1.21697	-1.35472	0.01085	0.0932891	no	OK	2.356	0.53848	-2.12937	-2.51876	5e-05	0.00129868	yes
XLOC_001073	CG33090	TSS1409,TSS1410	chr2L:14334157-14345795	20.6987	16.3871	13.1448	17.5587	13.9582	13.1385	12.9964	14.667	15.2655	15.1175	11.4277	17.1482	OK	14.7397	16.9473	0.201349	0.473974	0.33945	0.756201	no	OK	14.7397	13.69	-0.106585	-0.245597	0.61745	0.92422	no	OK	16.9473	13.69	-0.307934	-0.71751	0.1489	0.517229	no
XLOC_001074	CG15286	TSS1411	chr2L:14334157-14345795	0	0	0.389646	0.0765688	0	0.0260381	0.0851439	0.127539	0	0.0988012	0.0751816	0.239989	NOTEST	0.103493	0.116554	0.171463	0	1	1	no	NOTEST	0.103493	0.0596803	-0.794206	0	1	1	no	NOTEST	0.116554	0.0596803	-0.965668	0	1	1	no
XLOC_001075	CR44850	TSS1412	chr2L:14349019-14351513	0	0	0	0	0	0	0	0	0	0	0	0	NOTEST	0	0	0	0	1	1	no	NOTEST	0	0	0	0	1	1	no	NOTEST	0	0	0	0	1	1	no
XLOC_001076	CG43052	TSS1413	chr2L:14352076-14355085	0	0	0	0	0	0.134291	0	0	0	0	0.373927	0	NOTEST	0.0934818	0	#NAME?	0	1	1	no	NOTEST	0.0934818	0.0335728	-1.47739	0	1	1	no	NOTEST	0	0.0335728	inf	0	1	1	no
XLOC_001077	Rab14	TSS1414,TSS1415,TSS1416	chr2L:14355144-14358764	55.0643	51.2507	54.3617	54.6276	42.4079	43.7272	42.898	56.3669	48.955	49.1051	58.9749	41.4313	OK	49.6166	53.8261	0.117484	0.279862	0.5787	0.909717	no	OK	49.6166	46.35	-0.0982523	-0.229508	0.6472	0.933603	no	OK	53.8261	46.35	-0.215736	-0.505214	0.3125	0.729046	no
XLOC_001078	Pgant35A	TSS1417	chr2L:14359251-14361411	0	0	0.0604259	0.0422203	0	0	0	0.013187	0	0.0408234	0.0155504	0.0198396	NOTEST	0.0190534	0.0256615	0.429561	0	1	1	no	NOTEST	0.0190534	0.00329675	-2.53093	0	1	1	no	NOTEST	0.0256615	0.00329675	-2.96049	0	1	1	no
XLOC_001079	spel1	TSS1418	chr2L:14362068-14366840	7.63254	7.53889	10.0004	11.9413	18.3709	16.3448	19.7068	12.8498	11.1492	10.9089	12.3369	15.3249	OK	12.43	9.27829	-0.421896	-0.90471	0.0724	0.341514	no	OK	12.43	16.8181	0.43619	0.989583	0.0503	0.272677	no	OK	9.27829	16.8181	0.858085	1.88814	0.0003	0.00585337	yes
XLOC_001080	CR44733	TSS1419	chr2L:14409754-14410045	0	0	0	0	0	0	0	0	0	0	0	0	NOTEST	0	0	0	0	1	1	no	NOTEST	0	0	0	0	1	1	no	NOTEST	0	0	0	0	1	1	no
XLOC_001081	CR44730	TSS1420	chr2L:14457112-14457338	0	0	0	0	0	0	0	0	0	0	0	0	NOTEST	0	0	0	0	1	1	no	NOTEST	0	0	0	0	1	1	no	NOTEST	0	0	0	0	1	1	no
XLOC_001082	CR44731	TSS1421	chr2L:14486039-14486752	0	0	0	0.305651	0	0	0	0	0	0	0	0.036077	NOTEST	0.00901924	0.0764129	3.08274	0	1	1	no	NOTEST	0.00901924	0	#NAME?	0	1	1	no	NOTEST	0.0764129	0	#NAME?	0	1	1	no
XLOC_001083	noc	TSS1422	chr2L:14490858-14494019	25.5558	27.8233	36.2982	28.407	27.2554	28.1206	20.4791	48.5933	32.1749	42.6131	49.0047	28.2268	OK	38.0049	29.5211	-0.36444	-0.91633	0.0674	0.328205	no	OK	38.0049	31.1121	-0.288709	-0.713919	0.153	0.524407	no	OK	29.5211	31.1121	0.0757307	0.185194	0.71165	0.954793	no
XLOC_001084	CG33648	TSS1423,TSS1424	chr2L:14524311-14525656	0	0.328925	0.0760783	1.0385	0.322173	0	0	0.149398	0	0.0780129	0	0	NOTEST	0.0195032	0.360875	4.20972	0	1	1	no	NOTEST	0.0195032	0.117893	2.59569	0	1	1	no	NOTEST	0.360875	0.117893	-1.61402	0	1	1	no
XLOC_001085	CR44855	TSS1425	chr2L:14560777-14561355	0	0	0	0.404559	0	0	0	0	0	0	0	0	NOTEST	0	0.10114	inf	0	1	1	no	NOTEST	0	0	0	0	1	1	no	NOTEST	0.10114	0	#NAME?	0	1	1	no
XLOC_001086	CR44856	TSS1426	chr2L:14576472-14577097	0	0	0	0	0	0	0	0	0	0	0	0	NOTEST	0	0	0	0	1	1	no	NOTEST	0	0	0	0	1	1	no	NOTEST	0	0	0	0	1	1	no
XLOC_001087	CR43411	TSS1427	chr2L:14599195-14689340	0	0	0	0	0	0	0	0	0	0	0	0	NOTEST	0	0	0	0	1	1	no	NOTEST	0	0	0	0	1	1	no	NOTEST	0	0	0	0	1	1	no
XLOC_001088	Adh,Adhr	TSS1428,TSS1429,TSS1430	chr2L:14599195-14689340	4.17212	0.482546	5.07885	3.11093	0.736379	1.4575	1.88664	1.41327	1.60755	0.651293	5.35601	1.1753	OK	2.19754	3.21111	0.547185	0.167784	0.7568	0.964262	no	OK	2.19754	1.37345	-0.678088	-0.171057	0.6057	0.920133	no	OK	3.21111	1.37345	-1.22527	-0.339397	0.452	0.840197	no
XLOC_001089	CG15282	TSS1431,TSS1432	chr2L:14712470-14713298	0	0	0	0	0	0	0	0	0	0	0	0	NOTEST	0	0	0	0	1	1	no	NOTEST	0	0	0	0	1	1	no	NOTEST	0	0	0	0	1	1	no
XLOC_001090	CG34165	TSS1433	chr2L:14713749-14714526	0	0	0	0	0	0	0	0	0	0.702728	0	0.112881	NOTEST	0.203902	0	#NAME?	0	1	1	no	NOTEST	0.203902	0	#NAME?	0	1	1	no	NOTEST	0	0	0	0	1	1	no
XLOC_001091	CG31835	TSS1434	chr2L:14735842-14737067	0	0	0	0	0	0	0	0	0	0	0	0	NOTEST	0	0	0	0	1	1	no	NOTEST	0	0	0	0	1	1	no	NOTEST	0	0	0	0	1	1	no
XLOC_001092	CG31835	TSS1435	chr2L:14739913-14741138	0	0	0	0	0	0	0	0	0	0	0	0	NOTEST	0	0	0	0	1	1	no	NOTEST	0	0	0	0	1	1	no	NOTEST	0	0	0	0	1	1	no
XLOC_001093	CG34166	TSS1436	chr2L:14743192-14743879	0	0	0	0	0	0	0	0	0	0	0	0.113543	NOTEST	0.0283858	0	#NAME?	0	1	1	no	NOTEST	0.0283858	0	#NAME?	0	1	1	no	NOTEST	0	0	0	0	1	1	no
XLOC_001094	CG42681	TSS1437	chr2L:14744420-14744817	0	0	0	0	0	0	0	0	0	0	0	0	NOTEST	0	0	0	0	1	1	no	NOTEST	0	0	0	0	1	1	no	NOTEST	0	0	0	0	1	1	no
XLOC_001095	CR45459	TSS1438	chr2L:14745870-14746176	0	0	0	0	0	0	0	0	0	0	0	0	NOTEST	0	0	0	0	1	1	no	NOTEST	0	0	0	0	1	1	no	NOTEST	0	0	0	0	1	1	no
XLOC_001096	CG4691	TSS1439	chr2L:14760766-14761924	0	0	0	0	0	0	0	0	0	0	0	0	NOTEST	0	0	0	0	1	1	no	NOTEST	0	0	0	0	1	1	no	NOTEST	0	0	0	0	1	1	no
XLOC_001097	CR44858	TSS1440	chr2L:14761971-14762691	0	0	0	0	0	0	0	0	0	0	0	0	NOTEST	0	0	0	0	1	1	no	NOTEST	0	0	0	0	1	1	no	NOTEST	0	0	0	0	1	1	no
XLOC_001098	CSN1a	TSS1441	chr2L:14762764-14764065	0	0	0	0	0	0	0	0	0	0	0	0	NOTEST	0	0	0	0	1	1	no	NOTEST	0	0	0	0	1	1	no	NOTEST	0	0	0	0	1	1	no
XLOC_001099	CG4701	TSS1442	chr2L:14765907-14767225	0	0	0	0	0	0	0	0	0	0	0	0	NOTEST	0	0	0	0	1	1	no	NOTEST	0	0	0	0	1	1	no	NOTEST	0	0	0	0	1	1	no
XLOC_001100	CG33308	TSS1443	chr2L:14802333-14803293	0	0	0	0	0	0	0	0	0	0	0	0	NOTEST	0	0	0	0	1	1	no	NOTEST	0	0	0	0	1	1	no	NOTEST	0	0	0	0	1	1	no
XLOC_001101	CG33309	TSS1444	chr2L:14810760-14812599	0	0	0	0	0	0	0	0	0	0	0	0	NOTEST	0	0	0	0	1	1	no	NOTEST	0	0	0	0	1	1	no	NOTEST	0	0	0	0	1	1	no
XLOC_001102	CG42682	TSS1445	chr2L:14842357-14843108	0	0	0	0	0	0	0	0	0	0	0	0	NOTEST	0	0	0	0	1	1	no	NOTEST	0	0	0	0	1	1	no	NOTEST	0	0	0	0	1	1	no
XLOC_001103	CR45727	TSS1446	chr2L:14876831-14877136	0	0	0	0	0	0	0	0	0	0	0	0	NOTEST	0	0	0	0	1	1	no	NOTEST	0	0	0	0	1	1	no	NOTEST	0	0	0	0	1	1	no
XLOC_001104	CR45302	TSS1447	chr2L:14885104-14885411	0	0	0	0	0	0	0	0	0	0	0	0	NOTEST	0	0	0	0	1	1	no	NOTEST	0	0	0	0	1	1	no	NOTEST	0	0	0	0	1	1	no
XLOC_001105	CG3491	TSS1448	chr2L:14907488-14972300	0	0	0	0	0	0	0	0	0	0	0	0	NOTEST	0	0	0	0	1	1	no	NOTEST	0	0	0	0	1	1	no	NOTEST	0	0	0	0	1	1	no
XLOC_001106	CR45331	TSS1449	chr2L:14974467-14975001	0	0	0	0	0	0	0	0	0	0	0	0	NOTEST	0	0	0	0	1	1	no	NOTEST	0	0	0	0	1	1	no	NOTEST	0	0	0	0	1	1	no
XLOC_001107	dyn-p25	TSS1450	chr2L:15005732-15007431	30.0809	14.6387	15.1123	13.2694	21.59	20.1013	18.8128	17.103	14.2404	22.4944	13.6608	15.4669	OK	16.4656	18.2753	0.150443	0.202803	0.6904	0.947811	no	OK	16.4656	19.4018	0.236734	0.329221	0.50495	0.87542	no	OK	18.2753	19.4018	0.0862913	0.122683	0.79825	0.972682	no
XLOC_001108	NC2beta	TSS1451	chr2L:15007812-15009724	12.443	11.6719	11.1654	12.4674	16.4348	13.8326	17.8244	13.5928	16.2969	14.2781	16.2233	13.7444	OK	15.1357	11.9369	-0.342523	-0.44091	0.38115	0.789982	no	OK	15.1357	15.4211	0.0269551	0.0361273	0.94365	0.993315	no	OK	11.9369	15.4211	0.369478	0.469866	0.34445	0.759509	no
XLOC_001109	l(2)35Bd	TSS1452	chr2L:15009938-15011764	3.68429	5.73302	7.36021	6.66422	9.55276	6.53705	8.92954	6.16262	7.97703	9.14211	6.49305	7.37739	OK	7.74739	5.86043	-0.402703	-0.626618	0.21345	0.621082	no	OK	7.74739	7.79549	0.00892879	0.0147204	0.97675	0.996785	no	OK	5.86043	7.79549	0.411632	0.639822	0.2041	0.607335	no
XLOC_001110	CG33310,GABA-B-R1	TSS1453,TSS1454	chr2L:15016330-15034704	1.82497	3.51501	2.33886	1.19123	1.26736	0.785535	0.892309	2.02522	0.964942	0.490499	0.900864	0.67727	OK	0.758394	2.21752	1.54793	1.91812	0.00105	0.0159693	yes	OK	0.758394	1.24261	0.712351	0.825349	0.10105	0.419425	no	OK	2.21752	1.24261	-0.835575	-1.20261	0.0159	0.123536	no
XLOC_001111	yellow-c	TSS1455	chr2L:15035393-15038861	1.16165	0.598991	0.699289	0.410499	0	0.126726	0.0978268	0.0732498	0.135233	0	0.159712	0.151671	OK	0.111654	0.717606	2.68416	0.442536	0.13055	0.485353	no	NOTEST	0.111654	0.0744507	-0.584678	0	1	1	no	OK	0.717606	0.0744507	-3.26884	-0.460807	0.07845	0.358817	no
XLOC_001112	Su(H)	TSS1456	chr2L:15039487-15043334	7.79529	5.78138	6.38518	4.97326	5.86407	5.02548	5.0841	5.88746	5.48792	6.6633	5.39769	5.04507	OK	5.64849	6.23378	0.14224	0.24892	0.61835	0.924284	no	OK	5.64849	5.46528	-0.0475712	-0.0825329	0.8689	0.98459	no	OK	6.23378	5.46528	-0.189812	-0.330473	0.5104	0.878506	no
XLOC_001113	CG33679	TSS1457	chr2L:15058302-15060757	0	0.292003	0	0.213035	0	0	0	0	0	0	0	0	NOTEST	0	0.126259	inf	0	1	1	no	NOTEST	0	0	0	0	1	1	no	NOTEST	0.126259	0	#NAME?	0	1	1	no
XLOC_001114	vas	TSS1458	chr2L:15061655-15074383	0.948706	0.124259	0.118512	0.0727331	0.295083	0.330854	0.315187	0.260605	0.0886197	0	0.0597932	0.0762637	NOTEST	0.0561692	0.316052	2.49231	0	1	1	no	NOTEST	0.0561692	0.300432	2.41919	0	1	1	no	NOTEST	0.316052	0.300432	-0.0731249	0	1	1	no
XLOC_001115	CG15270	TSS1459	chr2L:15074775-15096915	1.18502	1.42768	0.761298	0.475021	1.54517	0.942452	1.15047	1.53356	0.60328	0.43948	0.581972	0.777827	OK	0.60064	0.962254	0.679918	0.761515	0.13455	0.493304	no	OK	0.60064	1.29291	1.10605	1.2927	0.0161	0.124549	no	OK	0.962254	1.29291	0.426135	0.537919	0.29915	0.714679	no
XLOC_001116	CG15269	TSS1460	chr2L:15109404-15113092	0	0	0	0.0215146	0	0.04388	0.0538363	0.0268846	0	0.312112	0.0634051	0.0404494	NOTEST	0.103992	0.00537865	-4.27308	0	1	1	no	NOTEST	0.103992	0.0311502	-1.73915	0	1	1	no	NOTEST	0.00537865	0.0311502	2.53393	0	1	1	no
XLOC_001117	stc	TSS1461	chr2L:15113479-15118069	39.9847	39.5089	33.9063	33.6531	31.1072	39.12	34.4443	32.6019	40.742	43.5691	34.2036	42.4056	OK	40.2301	36.7632	-0.130011	-0.345746	0.4855	0.861529	no	OK	40.2301	34.3183	-0.229295	-0.611751	0.2186	0.628723	no	OK	36.7632	34.3183	-0.0992839	-0.263614	0.5942	0.91576	no
XLOC_001118	CR43853	TSS1462	chr2L:15119782-15120819	1.29135	0	0	0	0.204283	0	0	0.0956198	0	0	0	0.0240624	NOTEST	0.0060156	0.322838	5.74596	0	1	1	no	NOTEST	0.0060156	0.0749758	3.63964	0	1	1	no	NOTEST	0.322838	0.0749758	-2.10631	0	1	1	no
XLOC_001119	CR43854	TSS1463	chr2L:15129700-15130205	0	0	0	0	0	0	0	0	0	0	0	0.0580974	NOTEST	0.0145244	0	#NAME?	0	1	1	no	NOTEST	0.0145244	0	#NAME?	0	1	1	no	NOTEST	0	0	0	0	1	1	no
XLOC_001120	CR44770	TSS1464	chr2L:15160650-15161083	0	0	0	0	0	0	0	0	0	0	0.113173	0	NOTEST	0.0282933	0	#NAME?	0	1	1	no	NOTEST	0.0282933	0	#NAME?	0	1	1	no	NOTEST	0	0	0	0	1	1	no
XLOC_001121	CR43357	TSS1465	chr2L:15202258-15203967	0	0	0	0	0	0	0	0.0611046	0.713839	0	0	0	NOTEST	0.17846	0	#NAME?	0	1	1	no	NOTEST	0.17846	0.0152762	-3.54625	0	1	1	no	NOTEST	0	0.0152762	inf	0	1	1	no
XLOC_001122	CR44196	TSS1466	chr2L:15207849-15208768	0	0	0	0	0.0742984	0	0	0	0	0.216523	0	0	NOTEST	0.0541306	0	#NAME?	0	1	1	no	NOTEST	0.0541306	0.0185746	-1.54311	0	1	1	no	NOTEST	0	0.0185746	inf	0	1	1	no
XLOC_001123	CG43230	TSS1467	chr2L:15215221-15216160	0	0	0	0	0	0	0	0	0	0	0	0	NOTEST	0	0	0	0	1	1	no	NOTEST	0	0	0	0	1	1	no	NOTEST	0	0	0	0	1	1	no
XLOC_001124	dao	TSS1468	chr2L:15248878-15254715	1.61527	1.51232	1.21859	1.1763	1.16423	1.04291	0.858633	1.40586	1.24371	0.585587	0.777687	0.726606	OK	0.833399	1.38062	0.72824	0.838563	0.0958	0.407563	no	OK	0.833399	1.11791	0.423724	0.477237	0.33735	0.753831	no	OK	1.38062	1.11791	-0.304516	-0.371947	0.4554	0.842375	no
XLOC_001125	l(2)35Cc	TSS1469	chr2L:15256580-15264692	5.15058	5.50256	5.24916	6.76526	5.3952	7.19383	9.06621	7.49783	4.86232	6.28498	6.19933	6.31314	OK	5.91494	5.66689	-0.0618074	-0.0190354	0.9718	0.99603	no	OK	5.91494	7.28827	0.301211	0.0975569	0.8683	0.98459	no	OK	5.66689	7.28827	0.363019	0.11879	0.8408	0.980328	no
XLOC_001126	CR43682	TSS1470	chr2L:15277796-15279497	2.78815	1.40743	0.325219	0.341524	0	0	0	0.212867	0	0.166929	0	0	OK	0.0417322	1.21558	4.86434	1.24831	0.23935	0.654361	no	NOTEST	0.0417322	0.0532168	0.350723	0	1	1	no	OK	1.21558	0.0532168	-4.51362	-1.42325	0.2223	0.633124	no
XLOC_001127	CR45349	TSS1471	chr2L:15280027-15280449	0	0	0	0	0	0	0	0	0	0	0	0	NOTEST	0	0	0	0	1	1	no	NOTEST	0	0	0	0	1	1	no	NOTEST	0	0	0	0	1	1	no
XLOC_001128	CG15263	TSS1472	chr2L:15284999-15286047	0	0	0	0.095119	0	0.146564	0	0	0.0691978	0	0.104938	0.0896061	NOTEST	0.0659355	0.0237798	-1.47132	0	1	1	no	NOTEST	0.0659355	0.0366411	-0.847591	0	1	1	no	NOTEST	0.0237798	0.0366411	0.623729	0	1	1	no
XLOC_001129	ms(2)35Ci	TSS1473	chr2L:15292467-15294136	0	0.0894157	0.303067	0.317682	0	0	0	0.0817863	0	0	0.0321266	0	NOTEST	0.00803165	0.177541	4.46631	0	1	1	no	NOTEST	0.00803165	0.0204466	1.34809	0	1	1	no	NOTEST	0.177541	0.0204466	-3.11822	0	1	1	no
XLOC_001130	CG15262	TSS1474	chr2L:15297807-15299367	1.95543	2.03344	1.15082	1.32687	0.239822	0.369921	0.251569	0.131847	0.438702	0.20445	0.310874	0.184393	OK	0.284605	1.61664	2.50597	1.51287	0.0162	0.125018	no	NOTEST	0.284605	0.24829	-0.196934	0	1	1	no	OK	1.61664	0.24829	-2.7029	-1.65289	0.01095	0.0938951	no
XLOC_001131	esg	TSS1475	chr2L:15333865-15336138	247.157	315.331	453.406	371.943	189.195	244.862	231.82	337.214	341.062	479.803	464.55	348.201	OK	408.404	346.959	-0.23523	-0.651184	0.1882	0.583497	no	OK	408.404	250.773	-0.703616	-1.94566	0.0001	0.00237535	yes	OK	346.959	250.773	-0.468385	-1.28722	0.00865	0.0792285	no
XLOC_001132	CR44859	TSS1476	chr2L:15396333-15396934	0	0	0	0	0	0	0	0	0	0	0	0	NOTEST	0	0	0	0	1	1	no	NOTEST	0	0	0	0	1	1	no	NOTEST	0	0	0	0	1	1	no
XLOC_001133	CG4161	TSS1477	chr2L:15433308-15435304	2.91213	3.66049	2.10642	2.68863	2.36123	3.03772	2.64669	2.5583	2.0423	1.95689	2.35438	1.9887	OK	2.08557	2.84192	0.446425	0.510996	0.3083	0.723967	no	OK	2.08557	2.65099	0.34609	0.392058	0.43215	0.829161	no	OK	2.84192	2.65099	-0.100335	-0.123157	0.80835	0.974385	no
XLOC_001134	CR44861	TSS1478	chr2L:15435746-15436319	0	2.32623	1.75362	1.94497	1.66211	2.13598	0.598458	1.46654	0.596031	0.602137	0.675129	0.7265	OK	0.649949	1.5062	1.21252	0.681123	0.16975	0.552759	no	OK	0.649949	1.46577	1.17326	0.647965	0.1925	0.590181	no	OK	1.5062	1.46577	-0.0392539	-0.0274114	0.9523	0.993348	no
XLOC_001135	CR44862	TSS1479	chr2L:15441600-15442314	0	0	0.581246	2.59334	0.614602	0.473937	0.445735	0.856033	1.22104	1.19117	1.3438	0.468147	OK	1.05604	0.793647	-0.412094	-0.256812	0.60125	0.917746	no	OK	1.05604	0.597577	-0.821467	-0.451272	0.34985	0.764351	no	OK	0.793647	0.597577	-0.409373	-0.212798	0.6794	0.944669	no
XLOC_001136	CR44863	TSS1480	chr2L:15463253-15463666	0	0	0.476466	0	0	0	0	0	0	0	0	0	NOTEST	0	0.119117	inf	0	1	1	no	NOTEST	0	0	0	0	1	1	no	NOTEST	0.119117	0	#NAME?	0	1	1	no
XLOC_001137	Tim17b2	TSS1481	chr2L:15484728-15485545	0.763733	0.578099	0.334891	0.3515	0	0.290716	0.176044	0.350737	0	0.137092	0.826031	0.398094	OK	0.340304	0.507056	0.57532	0.277084	0.7001	0.950458	no	NOTEST	0.340304	0.204374	-0.735611	0	1	1	no	OK	0.507056	0.204374	-1.31093	-0.591722	0.38925	0.797416	no
XLOC_001138	lace	TSS1482	chr2L:15499126-15505018	280.164	273.216	160.703	226.274	182.422	197.63	199.998	227.342	268.23	227.567	217.403	221.922	OK	233.78	235.089	0.00805438	0.0222779	0.96335	0.994712	no	OK	233.78	201.848	-0.211885	-0.590922	0.2332	0.646429	no	OK	235.089	201.848	-0.21994	-0.606886	0.23085	0.64408	no
XLOC_001139	CR43761	TSS1483	chr2L:15522001-15523993	0	0	0	0	0	0	0	0.0160341	0	0	0.0731224	0	NOTEST	0.0182806	0	#NAME?	0	1	1	no	NOTEST	0.0182806	0.00400851	-2.18917	0	1	1	no	NOTEST	0	0.00400851	inf	0	1	1	no
XLOC_001140	Skadu	TSS1484	chr2L:15547518-15548243	0	0	0	0	0	0	0	0	0	0	0	0	NOTEST	0	0	0	0	1	1	no	NOTEST	0	0	0	0	1	1	no	NOTEST	0	0	0	0	1	1	no
XLOC_001141	CR45728	TSS1485	chr2L:15549868-15550276	0	0	0	0	0	0	0	0	0	0	0	0	NOTEST	0	0	0	0	1	1	no	NOTEST	0	0	0	0	1	1	no	NOTEST	0	0	0	0	1	1	no
XLOC_001142	CG15256	TSS1486	chr2L:15550371-15552029	0	0	0	0	0	0	0	0	0	0	0	0	NOTEST	0	0	0	0	1	1	no	NOTEST	0	0	0	0	1	1	no	NOTEST	0	0	0	0	1	1	no
XLOC_001143	kek3	TSS1487	chr2L:15552722-15583978	0.216569	0.102323	0	0	0	0.0714809	0.00837642	0.034894	0	0.0290911	0.0148129	0.0330201	NOTEST	0.019231	0.0797229	2.05156	0	1	1	no	NOTEST	0.019231	0.0286878	0.577003	0	1	1	no	NOTEST	0.0797229	0.0286878	-1.47456	0	1	1	no
XLOC_001144	CR44865	TSS1488	chr2L:15610170-15611719	0	0	0	0	0	0	0	0	0	0	0	0	NOTEST	0	0	0	0	1	1	no	NOTEST	0	0	0	0	1	1	no	NOTEST	0	0	0	0	1	1	no
XLOC_001145	CG11865	TSS1489	chr2L:15616996-15617915	0	0	0	0	0	0	0	0.0382499	0	0	0	0	NOTEST	0	0	0	0	1	1	no	NOTEST	0	0.00956247	inf	0	1	1	no	NOTEST	0	0.00956247	inf	0	1	1	no
XLOC_001146	CG7631	TSS1490	chr2L:15628677-15629552	0	1.46179	25.8318	0.517572	0	0.6678	0.810008	2.42136	0.470724	0.189073	0.665404	0.701869	OK	0.506767	6.95278	3.77819	2.39823	0.0014	0.0200261	yes	OK	0.506767	0.974793	0.943772	0.492004	0.3634	0.775544	no	OK	6.95278	0.974793	-2.83442	-1.93115	0.0053	0.0558138	no
XLOC_001147	CG18480	TSS1491	chr2L:15630001-15634987	91.8806	120.865	64.9331	92.9762	62.1688	71.6719	63.7802	70.1093	79.6224	76.5289	54.2548	88.9495	OK	74.8389	92.6638	0.308217	0.80686	0.1087	0.437061	no	OK	74.8389	66.9326	-0.161081	-0.421059	0.40125	0.807721	no	OK	92.6638	66.9326	-0.469298	-1.227	0.0143	0.114141	no
XLOC_001148	CG31780	TSS1492	chr2L:15644182-15683275	0	0	0	0	0	0	0	0	0	0	0	0	NOTEST	0	0	0	0	1	1	no	NOTEST	0	0	0	0	1	1	no	NOTEST	0	0	0	0	1	1	no
XLOC_001149	CG31827	TSS1493	chr2L:15644182-15683275	0	0	0	0	0	0	0	0	0	0	0	0	NOTEST	0	0	0	0	1	1	no	NOTEST	0	0	0	0	1	1	no	NOTEST	0	0	0	0	1	1	no
XLOC_001150	CG18477	TSS1494	chr2L:15696037-15697750	0	0	0	0	0	0	0	0	0	0	0	0	NOTEST	0	0	0	0	1	1	no	NOTEST	0	0	0	0	1	1	no	NOTEST	0	0	0	0	1	1	no
XLOC_001151	CG18478	TSS1495	chr2L:15705170-15706220	0	0	0	0	0	0	0	0	0	0	0	0	NOTEST	0	0	0	0	1	1	no	NOTEST	0	0	0	0	1	1	no	NOTEST	0	0	0	0	1	1	no
XLOC_001152	CR44974	TSS1496	chr2L:15727580-15748324	0	0	0.0765187	0	0.216041	0.416483	0.268302	0.550959	0	0	0.0589607	0.113832	NOTEST	0.0431981	0.0191297	-1.17515	0	1	1	no	NOTEST	0.0431981	0.362946	3.07072	0	1	1	no	NOTEST	0.0191297	0.362946	4.24587	0	1	1	no
XLOC_001153	CR44866	TSS1497	chr2L:15727580-15748324	0	0	0	1.02904	0	0.562248	0.430453	0	0.751965	0	0	0.369916	NOTEST	0.28047	0.257259	-0.124627	0	1	1	no	NOTEST	0.28047	0.248175	-0.176489	0	1	1	no	NOTEST	0.257259	0.248175	-0.0518623	0	1	1	no
XLOC_001154	l(2)35Df	TSS1498	chr2L:15752262-15755900	5.62457	8.0607	13.8689	10.856	13.2768	16.4194	16.0213	12.6077	15.0199	22.525	15.8885	16.5522	OK	17.4964	9.60254	-0.86557	-1.93208	0.00015	0.00335951	yes	OK	17.4964	14.5813	-0.26294	-0.625974	0.2058	0.609479	no	OK	9.60254	14.5813	0.602631	1.33149	0.00795	0.0743151	no
XLOC_001155	CG3793	TSS1499	chr2L:15764219-15768349	15.8281	22.773	19.9454	18.4813	20.6014	25.1551	20.5071	20.9169	28.2281	21.6729	23.0382	21.7765	OK	23.6789	19.257	-0.298225	-0.545027	0.27305	0.687682	no	OK	23.6789	21.7951	-0.119598	-0.224564	0.65735	0.937018	no	OK	19.257	21.7951	0.178626	0.328375	0.5235	0.884281	no
XLOC_001156	CG18109	TSS1500	chr2L:15784084-15790146	0	0	0	0	0	0	0	0	0	0	0	0	NOTEST	0	0	0	0	1	1	no	NOTEST	0	0	0	0	1	1	no	NOTEST	0	0	0	0	1	1	no
XLOC_001157	CR43763	TSS1501	chr2L:15846953-15847381	0	0	0.899846	0.315761	0	0	0	0.588836	0	0	0	0.0750407	NOTEST	0.0187602	0.303902	4.01786	0	1	1	no	NOTEST	0.0187602	0.147209	2.97212	0	1	1	no	NOTEST	0.303902	0.147209	-1.04574	0	1	1	no
XLOC_001158	CG13243,Tektin-A	TSS1502,TSS1503,TSS1504	chr2L:15852591-15856450	0.0813672	0	0.0647258	0.567007	0.832955	1.19256	0.27096	0.397843	0.194832	0.0324369	0.0492874	0.0493764	NOTEST	0.0814832	0.178275	1.12953	0	1	1	no	OK	0.0814832	0.67358	3.04728	1.46812	0.00095	0.0147702	yes	OK	0.178275	0.67358	1.91775	1.04943	0.1436	0.509392	no
XLOC_001159	CR42791	TSS1505	chr2L:15863199-15863663	0	0	0.803588	1.18479	0	0	0	0	0	0	0	0	NOTEST	0	0.497093	inf	0	1	1	no	NOTEST	0	0	0	0	1	1	no	NOTEST	0.497093	0	#NAME?	0	1	1	no
XLOC_001160	CG31735	TSS1506	chr2L:15895453-15897071	0	0	0	0	0	0	0	0	0	0	0	0	NOTEST	0	0	0	0	1	1	no	NOTEST	0	0	0	0	1	1	no	NOTEST	0	0	0	0	1	1	no
XLOC_001161	CR44867	TSS1507	chr2L:15905133-15962435	0	0	1.1357	0.598622	0	0	0	0.371587	1.16356	0	0	0	NOTEST	0.29089	0.433582	0.575831	0	1	1	no	NOTEST	0.29089	0.0928968	-1.64677	0	1	1	no	NOTEST	0.433582	0.0928968	-2.2226	0	1	1	no
XLOC_001162	CR44868	TSS1508	chr2L:15905133-15962435	1.96258	4.90631	2.87375	5.50096	0.877057	1.35251	1.62164	3.62726	2.1982	1.2701	3.23951	1.9912	OK	2.17475	3.8109	0.809282	0.521975	0.3135	0.729715	no	OK	2.17475	1.86962	-0.218106	-0.124114	0.79465	0.971559	no	OK	3.8109	1.86962	-1.02739	-0.599793	0.24555	0.660314	no
XLOC_001163	CG13244	TSS1509	chr2L:15905133-15962435	0.340444	1.54696	0.981487	0.656081	0	0	0.156534	0.525597	0	0.642258	0.481054	0.221569	OK	0.33622	0.881242	1.39013	0.423675	0.51855	0.881276	no	NOTEST	0.33622	0.170533	-0.979358	0	1	1	no	OK	0.881242	0.170533	-2.36949	-0.634347	0.31595	0.732257	no
XLOC_001164	CG4793	TSS1510	chr2L:15905133-15962435	0.567982	0	0.256317	0.252737	0	0.0321654	0.0263487	0.0296144	0	0	0	0.155842	NOTEST	0.0389605	0.269259	2.78891	0	1	1	no	NOTEST	0.0389605	0.0220321	-0.822402	0	1	1	no	NOTEST	0.269259	0.0220321	-3.61131	0	1	1	no
XLOC_001165	CG12448	TSS1511	chr2L:15905133-15962435	0	0	0	0.0372678	0	0	0	0	0	0	0	0	NOTEST	0	0.00931696	inf	0	1	1	no	NOTEST	0	0	0	0	1	1	no	NOTEST	0.00931696	0	#NAME?	0	1	1	no
XLOC_001166	CG18063	TSS1512	chr2L:15905133-15962435	0	0	0	0	0	0	0	0	0	0	0	0	NOTEST	0	0	0	0	1	1	no	NOTEST	0	0	0	0	1	1	no	NOTEST	0	0	0	0	1	1	no
XLOC_001167	CR43803	TSS1513	chr2L:15905133-15962435	0	0	0	0	0	0	0	0	0	0	0	0.0603806	NOTEST	0.0150951	0	#NAME?	0	1	1	no	NOTEST	0.0150951	0	#NAME?	0	1	1	no	NOTEST	0	0	0	0	1	1	no
XLOC_001168	CG10839	TSS1514	chr2L:15979485-15981455	0	0	0	0	0	0	0	0	0	0	0	0	NOTEST	0	0	0	0	1	1	no	NOTEST	0	0	0	0	1	1	no	NOTEST	0	0	0	0	1	1	no
XLOC_001169	CR43412	TSS1515	chr2L:15989755-15989957	0	0	0	0	0	0	0	0	0	0	0	0	NOTEST	0	0	0	0	1	1	no	NOTEST	0	0	0	0	1	1	no	NOTEST	0	0	0	0	1	1	no
XLOC_001170	beat-Ic	TSS1516,TSS1517	chr2L:16000290-16041703	0.0468359	0.239008	0	0.130279	1.65537	1.68345	0.620838	0.822574	1.04348	0.664638	0.586401	0.603001	OK	0.72438	0.104031	-2.79974	-1.92054	0.161	0.539551	no	OK	0.72438	1.19556	0.722863	0.811953	0.10865	0.437061	no	OK	0.104031	1.19556	3.5226	2.46156	0.12405	0.471664	no
XLOC_001171	CR43825	TSS1518	chr2L:16000290-16041703	0	0	0	0	0	0	0	0	0	0	0	0	NOTEST	0	0	0	0	1	1	no	NOTEST	0	0	0	0	1	1	no	NOTEST	0	0	0	0	1	1	no
XLOC_001172	CG13245	TSS1519,TSS1520,TSS1521	chr2L:16000290-16041703	0	0	0	0	0	0	0	0	0	0	0	0	NOTEST	0	0	0	0	1	1	no	NOTEST	0	0	0	0	1	1	no	NOTEST	0	0	0	0	1	1	no
XLOC_001173	CR44844	TSS1522	chr2L:16000290-16041703	0	0	0	0	0	0	0	0	0	0	0	0	NOTEST	0	0	0	0	1	1	no	NOTEST	0	0	0	0	1	1	no	NOTEST	0	0	0	0	1	1	no
XLOC_001174	BicC,CG45084	TSS1523,TSS1524,TSS1525	chr2L:16042046-16048757	0.318562	0.240844	0.0878474	0.103525	0.116821	0.161345	0.0182258	0.0184579	0.128885	0.0713309	0	0.062444	NOTEST	0.065665	0.187695	1.51519	0	1	1	no	NOTEST	0.065665	0.0787126	0.261469	0	1	1	no	NOTEST	0.187695	0.0787126	-1.25372	0	1	1	no
XLOC_001175	beat-Ia	TSS1526	chr2L:16049964-16081684	0	0	0.0150148	0.0157331	0	0	0	0	0	0	0.0115902	0	NOTEST	0.00289756	0.00768697	1.40758	0	1	1	no	NOTEST	0.00289756	0	#NAME?	0	1	1	no	NOTEST	0.00768697	0	#NAME?	0	1	1	no
XLOC_001176	CG4891	TSS1527	chr2L:16094996-16095944	0	0	0	0	0	0	0	0	0	0	0	0	NOTEST	0	0	0	0	1	1	no	NOTEST	0	0	0	0	1	1	no	NOTEST	0	0	0	0	1	1	no
XLOC_001177	CG4892	TSS1528	chr2L:16133507-16134412	0	0	0	0	0	0	0	0	0	0	0	0	NOTEST	0	0	0	0	1	1	no	NOTEST	0	0	0	0	1	1	no	NOTEST	0	0	0	0	1	1	no
XLOC_001178	Ca-alpha1D	TSS1529,TSS1530	chr2L:16165830-16190540	10.4238	11.5048	12.6779	8.08007	9.607	7.36785	8.5371	15.5533	7.12152	3.91619	6.18539	7.9993	OK	6.3056	10.6716	0.759077	1.83139	0.0005	0.00885065	yes	OK	6.3056	10.2663	0.703212	1.67941	0.00095	0.0147702	yes	OK	10.6716	10.2663	-0.0558656	-0.138838	0.7802	0.96913	no
XLOC_001179	CR44736	TSS1531	chr2L:16203109-16203476	0	0	0	0	0	0	0	0	0	0	0	0	NOTEST	0	0	0	0	1	1	no	NOTEST	0	0	0	0	1	1	no	NOTEST	0	0	0	0	1	1	no
XLOC_001180	CG31819	TSS1532	chr2L:16211458-16213304	0	0	0	0	0	0	0	0	0	0	0	0	NOTEST	0	0	0	0	1	1	no	NOTEST	0	0	0	0	1	1	no	NOTEST	0	0	0	0	1	1	no
XLOC_001181	CG42817	TSS1533	chr2L:16231474-16241527	21.3859	13.5469	13.72	6.91069	11.962	7.45658	7.75679	16.5697	7.00299	5.74083	5.87886	7.64527	OK	6.56699	13.8909	1.08083	2.49219	5e-05	0.00129868	yes	OK	6.56699	10.9363	0.735816	1.68034	0.0009	0.0141387	yes	OK	13.8909	10.9363	-0.345018	-0.812855	0.10315	0.424509	no
XLOC_001182	CG42818	TSS1534	chr2L:16241938-16245559	0	0.283268	0.156813	0.35381	0.0333316	0.257081	0.115921	0.189544	0.238938	0.927401	0.158361	0.201788	NOTEST	0.381622	0.198473	-0.943204	0	1	1	no	NOTEST	0.381622	0.148969	-1.35713	0	1	1	no	NOTEST	0.198473	0.148969	-0.413924	0	1	1	no
XLOC_001183	EndoGI	TSS1535,TSS1536	chr2L:16257687-16261877	465.599	490.721	317.405	342.456	255.538	271.421	250.801	262.606	295.907	303.198	307	281.822	OK	296.982	404.045	0.444142	1.20916	0.01645	0.126267	no	OK	296.982	260.092	-0.191355	-0.528299	0.2914	0.706902	no	OK	404.045	260.092	-0.635497	-1.73122	0.0008	0.0129151	yes
XLOC_001184	CG4935	TSS1537	chr2L:16262140-16263483	5.28513	3.84222	5.6281	5.67355	5.11675	4.13396	3.66515	3.74149	1.73083	2.97683	5.14934	3.70628	OK	3.39082	5.10725	0.590912	0.668343	0.17305	0.55899	no	OK	3.39082	4.16434	0.296452	0.317886	0.5154	0.879907	no	OK	5.10725	4.16434	-0.29446	-0.336029	0.49885	0.871389	no
XLOC_001185	pkaap	TSS1538	chr2L:16288289-16291195	7.19492	9.06677	11.8611	8.53815	8.07442	6.60499	7.46122	9.95292	7.92066	10.724	11.8877	7.95467	OK	9.62178	9.16525	-0.0701297	-0.134619	0.78605	0.969743	no	OK	9.62178	8.02339	-0.262092	-0.494565	0.31575	0.732208	no	OK	9.16525	8.02339	-0.191962	-0.3593	0.47065	0.852675	no
XLOC_001186	CG17329	TSS1539	chr2L:16291283-16291948	0	0	0.478181	0.0836876	0.56314	0.955333	0.419238	0.521647	0.121799	1.63571	0.552625	0.316281	OK	0.656604	0.140467	-2.22479	-0.939021	0.2621	0.675255	no	OK	0.656604	0.61484	-0.0948131	-0.0488344	0.92335	0.990722	no	OK	0.140467	0.61484	2.12998	0.883219	0.2782	0.69442	no
XLOC_001187	Cyp303a1	TSS1540	chr2L:16294182-16299858	0.751054	1.57248	0.720778	0.867602	0.933284	0.817976	0.495806	0.682755	1.05168	0.481259	0.461828	0.69445	OK	0.672303	0.977979	0.540692	0.281358	0.62155	0.925824	no	OK	0.672303	0.732455	0.123628	0.0576253	0.92245	0.990387	no	OK	0.977979	0.732455	-0.417064	-0.208936	0.69235	0.948098	no
XLOC_001188	CG17328	TSS1541,TSS1542	chr2L:16299942-16302954	2.39102	2.58346	3.36088	2.78133	3.18477	3.58723	3.2402	3.65136	3.11035	4.77557	3.23416	2.90178	OK	3.50546	2.77917	-0.33495	-0.178848	0.7751	0.96798	no	OK	3.50546	3.41589	-0.0373435	-0.0216952	0.9666	0.995251	no	OK	2.77917	3.41589	0.297606	0.155418	0.7831	0.96961	no
XLOC_001189	c(2)M	TSS1543	chr2L:16303263-16307298	0.577969	0.655524	0.383297	0.522109	0.530815	0.4094	0.184243	0.238399	0.262898	0.504827	0.34032	0.217062	OK	0.331277	0.534725	0.690759	0.238742	0.75635	0.964262	no	NOTEST	0.331277	0.340714	0.0405247	0	1	1	no	OK	0.534725	0.340714	-0.650234	-0.226927	0.78325	0.96961	no
XLOC_001190	Syx5	TSS1544	chr2L:16307345-16309274	55.0265	53.9677	41.019	43.816	43.1074	45.3652	43.0799	42.5413	54.1562	44.9968	38.5289	46.7335	OK	46.1038	48.4573	0.0718279	0.179258	0.7236	0.957563	no	OK	46.1038	43.5234	-0.0830946	-0.206707	0.6758	0.94345	no	OK	48.4573	43.5234	-0.154923	-0.386382	0.438	0.832612	no
XLOC_001191	fzy	TSS1545	chr2L:16310955-16326207	0.910304	2.48726	3.59825	3.08089	13.1687	14.2847	17.1451	6.32034	5.85302	3.71436	5.42015	7.12244	OK	5.52749	2.51918	-1.13367	-0.58747	0.2622	0.675452	no	OK	5.52749	12.7297	1.2035	0.916055	0.07845	0.358817	no	OK	2.51918	12.7297	2.33718	1.30438	0.05005	0.271889	no
XLOC_001192	CG4278	TSS1546	chr2L:16327068-16329132	9.45526	12.263	17.1688	17.398	27.0926	23.0073	25.4057	17.0487	18.1685	16.534	15.927	18.2389	OK	17.2171	14.0713	-0.291089	-0.396352	0.42505	0.824574	no	OK	17.2171	23.1386	0.426459	0.668781	0.1789	0.568709	no	OK	14.0713	23.1386	0.717548	1.01629	0.04775	0.263393	no
XLOC_001193	CG4440	TSS1547	chr2L:16329924-16330521	0	0.462864	0.851431	2.2373	0.151777	0.936206	0.093441	0.351855	1.37636	1.49334	0.655384	0.794538	OK	1.0799	0.8879	-0.282434	-0.147358	0.83255	0.978596	no	OK	1.0799	0.38332	-1.49428	-0.644097	0.34895	0.764053	no	OK	0.8879	0.38332	-1.21185	-0.548588	0.635	0.930698	no
XLOC_001194	CG4455	TSS1548	chr2L:16352933-16354539	18.7908	20.7495	11.6889	16.2952	17.2248	20.3211	20.9315	14.9387	23.2119	17.7871	15.884	18.0155	OK	18.7246	16.8811	-0.14953	-0.298096	0.5472	0.895922	no	OK	18.7246	18.354	-0.0288406	-0.0582695	0.90615	0.988318	no	OK	16.8811	18.354	0.120689	0.240008	0.63175	0.929075	no
XLOC_001195	jhamt	TSS1549	chr2L:16365902-16367039	0	0	0	0.149058	0	0	0.124383	0	0.216878	0	0	0.163849	NOTEST	0.0951817	0.0372644	-1.35289	0	1	1	no	NOTEST	0.0951817	0.0310956	-1.61397	0	1	1	no	NOTEST	0.0372644	0.0310956	-0.261086	0	1	1	no
XLOC_001196	Idgf1	TSS1550	chr2L:16400174-16450508	2.60491	2.08211	0.470159	0.229997	0.043583	0.0336127	0.0822326	0	0	0	0.314462	0.0927461	OK	0.101802	1.34679	3.72569	1.64641	0.18185	0.572996	no	NOTEST	0.101802	0.0398571	-1.35286	0	1	1	no	OK	1.34679	0.0398571	-5.07855	-1.45275	0.02655	0.17739	no
XLOC_001197	Idgf2	TSS1551,TSS1552	chr2L:16400174-16450508	0	0.0715246	0.0667317	0	0	0	0.233469	0.0655293	0	0.135625	0	0.0931093	NOTEST	0.0571836	0.0345641	-0.726329	0	1	1	no	NOTEST	0.0571836	0.0747496	0.386464	0	1	1	no	NOTEST	0.0345641	0.0747496	1.11279	0	1	1	no
XLOC_001198	Idgf3	TSS1553,TSS1554	chr2L:16450906-16455194	49.9838	32.6693	7.19881	8.55908	1.2395	1.39112	0.709683	1.75288	2.30946	1.7845	2.6101	1.31987	OK	2.00598	24.6028	3.61644	4.59928	5e-05	0.00129868	yes	OK	2.00598	1.2733	-0.655741	-0.630172	0.20635	0.610161	no	OK	24.6028	1.2733	-4.27218	-5.00074	5e-05	0.00129868	yes
XLOC_001199	CG4580	TSS1555	chr2L:16488147-16490182	0.333548	0.236456	0.22109	0.208516	0.521015	0.803675	0.309207	0.448716	0.505542	0.0448263	0.153611	0.577233	NOTEST	0.320303	0.249903	-0.358071	0	1	1	no	OK	0.320303	0.520654	0.700886	0.399454	0.42545	0.824765	no	OK	0.249903	0.520654	1.05896	0.708311	0.1479	0.515507	no
XLOC_001200	Tpr2	TSS1556,TSS1557,TSS1558	chr2L:16491539-16507621	78.1051	98.2061	105.094	86.1219	102.305	94.474	100.259	99.2217	82.9647	100.821	111.487	90.8442	OK	96.5291	91.8819	-0.0711846	-0.192395	0.6966	0.949601	no	OK	96.5291	99.065	0.0374109	0.101783	0.8339	0.978695	no	OK	91.8819	99.065	0.108595	0.293804	0.55355	0.898812	no
XLOC_001201	CG31816	TSS1559	chr2L:16542545-16543263	0	0	0	0.242362	0	0	0	0	0	0	0	0.0574235	NOTEST	0.0143559	0.0605904	2.07745	0	1	1	no	NOTEST	0.0143559	0	#NAME?	0	1	1	no	NOTEST	0.0605904	0	#NAME?	0	1	1	no
XLOC_001202	CG42389	TSS1560,TSS1561,TSS1562	chr2L:16545015-16663218	136.447	136.593	101.718	115.15	93.5854	119.828	79.9234	99.3426	134.919	131.429	90.538	123.409	OK	120.073	122.477	0.0285945	0.0780157	0.8749	0.985234	no	OK	120.073	98.1698	-0.290567	-0.790049	0.11815	0.458924	no	OK	122.477	98.1698	-0.319161	-0.875359	0.0821	0.370304	no
XLOC_001203	CG31815	TSS1563	chr2L:16545015-16663218	0	0.515458	0.0603571	0.378088	0.0419031	0.129168	0.183992	0.0985203	0.137509	0.0612468	0.0930671	0.0741172	NOTEST	0.0914849	0.238476	1.38224	0	1	1	no	NOTEST	0.0914849	0.113396	0.309761	0	1	1	no	NOTEST	0.238476	0.113396	-1.07248	0	1	1	no
XLOC_001204	CG4631	TSS1564	chr2L:16545015-16663218	0	0.274718	0.112571	0.201951	0.311182	0.274387	0.210545	0.09472	0	0.244059	0.0869692	0.12652	NOTEST	0.114387	0.14731	0.364933	0	1	1	no	NOTEST	0.114387	0.222709	0.961235	0	1	1	no	NOTEST	0.14731	0.222709	0.596302	0	1	1	no
XLOC_001205	her,mir-2497	TSS1565,TSS1566	chr2L:16677184-16679691	3.73802	7.12646	10.4188	7.71302	6.54674	8.09231	8.81141	8.58849	7.68362	10.6663	10.3065	7.91578	OK	9.14304	7.24908	-0.334876	-0.57449	0.22945	0.64224	no	OK	9.14304	8.00974	-0.190919	-0.337057	0.4883	0.863642	no	OK	7.24908	8.00974	0.143957	0.24113	0.61945	0.92491	no
XLOC_001206	grp,squ	TSS1567,TSS1568,TSS1569,TSS1570	chr2L:16680053-16699926	57.8176	56.0979	42.2834	48.6671	56.2571	51.3433	56.2997	46.4115	45.2961	53.4899	48.6569	51.2302	OK	49.6683	51.2165	0.0442843	0.107907	0.83595	0.979177	no	OK	49.6683	52.5779	0.0821327	0.20197	0.71145	0.954793	no	OK	51.2165	52.5779	0.0378483	0.0918341	0.8624	0.983064	no
XLOC_001207	CG33552	TSS1571	chr2L:16680053-16699926	0	1.10597	0.19233	0.134579	0.270368	0.625445	0.224637	0.545519	0	0.262259	0.642563	0.603062	NOTEST	0.376971	0.358219	-0.0736138	0	1	1	no	NOTEST	0.376971	0.416492	0.143835	0	1	1	no	NOTEST	0.358219	0.416492	0.217449	0	1	1	no
XLOC_001208	mir-9c	TSS1572	chr2L:16680053-16699926	0	0	0	0	0	0	0	0	0	981.467	388.851	95.3082	OK	366.406	0	#NAME?	#NAME?	0.14895	0.517277	no	OK	366.406	0	#NAME?	#NAME?	0.14935	0.5181	no	NOTEST	0	0	0	0	1	1	no
XLOC_001209	mir-306	TSS1573	chr2L:16680053-16699926	0	0	0	0	0	0	0	0	0	0	0	0	NOTEST	0	0	0	0	1	1	no	NOTEST	0	0	0	0	1	1	no	NOTEST	0	0	0	0	1	1	no
XLOC_001210	mir-79	TSS1574	chr2L:16680053-16699926	0	0	0	0	0	0	0	0	0	0	0	0	NOTEST	0	0	0	0	1	1	no	NOTEST	0	0	0	0	1	1	no	NOTEST	0	0	0	0	1	1	no
XLOC_001211	mir-9b	TSS1575	chr2L:16680053-16699926	0	0	0	0	0	0	0	0	0	0	0	0	NOTEST	0	0	0	0	1	1	no	NOTEST	0	0	0	0	1	1	no	NOTEST	0	0	0	0	1	1	no
XLOC_001212	Cyt-c-d	TSS1576	chr2L:16704285-16719635	0.451469	2.17818	1.66509	1.56	1.3355	1.80231	1.35413	3.50344	1.08962	1.3368	0.596034	0.941677	OK	0.991033	1.46369	0.5626	0.226058	0.6701	0.941872	no	OK	0.991033	1.99884	1.01216	0.431006	0.518	0.880969	no	OK	1.46369	1.99884	0.44956	0.200521	0.7181	0.95632	no
XLOC_001213	Cyt-c-p	TSS1577,TSS1578	chr2L:16719931-16722644	408.864	328.042	267.602	325.914	387.354	404.428	349.373	377.823	420.732	433.815	297.205	322.54	OK	368.573	332.605	-0.148139	-0.397928	0.4225	0.822989	no	OK	368.573	379.745	0.0430795	0.116643	0.81395	0.975275	no	OK	332.605	379.745	0.191219	0.516267	0.29245	0.70795	no
XLOC_001214	CG31812	TSS1579	chr2L:16729776-16732133	1.25887	2.78507	1.16596	1.36202	2.31758	2.21636	1.3694	1.6793	1.57503	0.913988	1.25967	1.11743	OK	1.21653	1.64298	0.433544	0.164075	0.82715	0.977417	no	OK	1.21653	1.89566	0.639929	0.237428	0.7879	0.970399	no	OK	1.64298	1.89566	0.206385	0.0852252	0.901	0.987718	no
XLOC_001215	CG17904	TSS1580	chr2L:16732549-16738388	37.155	34.1284	26.3179	32.4469	38.5315	38.0094	33.7374	29.7901	48.4847	47.9597	31.9803	45.866	OK	43.5727	32.512	-0.42245	-0.759984	0.13185	0.487526	no	OK	43.5727	35.0171	-0.315365	-0.501167	0.29985	0.715635	no	OK	32.512	35.0171	0.107084	0.16632	0.72705	0.958316	no
XLOC_001216	ChLD3	TSS1581	chr2L:16738849-16743100	0	0	0.1531	0.481259	0.477049	0.183966	0.133804	0.22553	1.02093	0.911267	0.369387	0.687952	OK	0.747385	0.15859	-2.23655	-0.699666	0.3157	0.732208	no	OK	0.747385	0.255087	-1.55086	-0.5782	0.3454	0.760367	no	NOTEST	0.15859	0.255087	0.685688	0	1	1	no
XLOC_001217	CG17912	TSS1582	chr2L:16743404-16753704	29.9291	33.8647	47.7359	39.5901	36.545	40.1644	38.3512	44.1262	38.5343	48.4331	48.4527	41.7008	OK	44.2802	37.78	-0.229042	-0.465438	0.34745	0.762483	no	OK	44.2802	39.7967	-0.154014	-0.314468	0.5264	0.885105	no	OK	37.78	39.7967	0.0750275	0.148979	0.76305	0.965936	no
XLOC_001218	yellow-b	TSS1583	chr2L:16754335-16760554	13.4902	7.93917	5.26605	7.24778	2.27578	3.1936	2.77163	3.74658	3.8528	4.48687	3.96117	3.25161	OK	3.88811	8.4858	1.12598	0.980517	0.05005	0.271889	no	OK	3.88811	2.9969	-0.375601	-0.24291	0.6066	0.92022	no	OK	8.4858	2.9969	-1.50158	-1.15104	0.0392	0.230205	no
XLOC_001219	Mhc	TSS1584,TSS1585,TSS1586,TSS1587,TSS1588	chr2L:16766565-16788766	0.609874	0.292557	0.224497	0.202465	0.385509	0.157956	0.128767	0.28518	0.132988	0.140411	0.210314	0.199469	NOTEST	0.170795	0.332348	0.960426	0	1	1	no	NOTEST	0.170795	0.239353	0.48687	0	1	1	no	NOTEST	0.332348	0.239353	-0.473556	0	1	1	no
XLOC_001220	CG17928	TSS1589	chr2L:16791567-16793444	0	0.120209	0.972552	0.481435	1.20858	0.549659	0.245419	1.02906	0	0.0284825	0.607265	0.207548	NOTEST	0.210824	0.393549	0.900506	0	1	1	no	OK	0.210824	0.75818	1.8465	1.03572	0.28735	0.703279	no	OK	0.393549	0.75818	0.945996	0.565954	0.3923	0.800159	no
XLOC_001221	Ugt36Ba	TSS1590	chr2L:16794210-16796009	13.3623	13.6748	10.0403	8.70807	15.1086	12.9078	8.87605	21.2503	12.8209	8.64934	9.22015	15.7862	OK	11.6191	11.4463	-0.0216158	-0.0396449	0.93425	0.992441	no	OK	11.6191	14.5357	0.323098	0.60246	0.2331	0.646388	no	OK	11.4463	14.5357	0.344714	0.642249	0.20225	0.60428	no
XLOC_001222	Ugt36Bb	TSS1591	chr2L:16796594-16798273	0	0.590746	0.0827656	0.433743	0.613014	0.0886469	0.0964879	0.361234	0.925449	0.420006	0.298116	0.353586	OK	0.499289	0.276814	-0.85096	-0.517137	0.3129	0.729499	no	OK	0.499289	0.289846	-0.78459	-0.457211	0.3514	0.765167	no	NOTEST	0.276814	0.289846	0.0663698	0	1	1	no
XLOC_001223	Ugt36Bc	TSS1592,TSS1593	chr2L:16799024-16801584	6.25255	7.32136	7.0214	6.63747	12.6136	10.2185	6.60735	15.8937	12.0646	6.75997	8.33422	14.2908	OK	10.3624	6.80819	-0.606013	-1.00905	0.04145	0.238765	no	OK	10.3624	11.3333	0.129209	0.230252	0.6435	0.933371	no	OK	6.80819	11.3333	0.735222	1.24916	0.013	0.106193	no
XLOC_001224	CG13272	TSS1594,TSS1595	chr2L:16802025-16826964	0	0.138993	0	0.013501	0	0	0	0	0	0	0.0783596	0.044723	NOTEST	0.0307706	0.0381234	0.309124	0	1	1	no	NOTEST	0.0307706	0	#NAME?	0	1	1	no	NOTEST	0.0381234	0	#NAME?	0	1	1	no
XLOC_001225	mdy	TSS1596,TSS1597	chr2L:16802025-16826964	8.26326	7.73962	2.03891	3.57946	10.0752	9.72943	7.90041	6.91145	6.08789	7.00237	6.11672	12.0318	OK	7.80969	5.40531	-0.530886	-0.344921	0.5101	0.878331	no	OK	7.80969	8.65412	0.148122	0.129099	0.80525	0.973334	no	OK	5.40531	8.65412	0.679009	0.438112	0.39885	0.805483	no
XLOC_001226	CG31739	TSS1598,TSS1599	chr2L:16827077-16834502	24.0937	23.7935	23.0777	22.1624	23.5431	23.9662	24.8153	21.209	24.8169	28.0592	19.8065	23.0731	OK	23.9389	23.2818	-0.040154	-0.101321	0.83535	0.978964	no	OK	23.9389	23.3834	-0.0338748	-0.0851794	0.8589	0.982051	no	OK	23.2818	23.3834	0.0062792	0.0157996	0.97405	0.996334	no
XLOC_001227	SclA,SclB	TSS1600,TSS1601,TSS1602	chr2L:16837971-16841884	2.11426	1.49742	1.07486	0.317817	2.76271	0.410197	0.526912	0.352601	0.352791	0.631421	0.730159	0.612934	OK	0.581826	1.25109	1.10452	0.579045	0.1853	0.578264	no	OK	0.581826	1.0131	0.800122	0.384835	0.4378	0.832612	no	OK	1.25109	1.0131	-0.304403	-0.185383	0.7192	0.956583	no
XLOC_001228	CR43858	TSS1603	chr2L:16861496-16862431	0	0	0	0	0	0	0	0	0	0	0	0	NOTEST	0	0	0	0	1	1	no	NOTEST	0	0	0	0	1	1	no	NOTEST	0	0	0	0	1	1	no
XLOC_001229	CR31781	TSS1604,TSS1605,TSS1606	chr2L:16869345-16878300	0	0	0.347759	0.0387494	0.102417	0	0.0161575	0.205831	0.197305	0.149865	0.0731938	0.0546321	NOTEST	0.118749	0.096627	-0.297416	0	1	1	no	NOTEST	0.118749	0.0811014	-0.550114	0	1	1	no	NOTEST	0.096627	0.0811014	-0.252699	0	1	1	no
XLOC_001230	CG31743,CG34313	TSS1607,TSS1608	chr2L:16879516-16886319	140.879	182.863	37.7373	99.4482	166.045	217.329	188.274	107.829	259.927	202.31	107.328	159.496	OK	182.266	115.232	-0.661504	-1.68804	0.00075	0.0122881	yes	OK	182.266	169.869	-0.101617	-0.270786	0.59005	0.914559	no	OK	115.232	169.869	0.559887	1.44364	0.0051	0.054166	no
XLOC_001231	CR44392,tweek	TSS1609	chr2L:16888489-16917052	25.4481	31.6209	25.2495	24.0038	16.4088	22.0727	21.64	24.2715	22.3299	20.403	21.8704	26.1167	OK	22.68	26.5806	0.228952	0.528947	0.23705	0.651297	no	OK	22.68	21.0982	-0.104299	-0.223684	0.6006	0.91739	no	OK	26.5806	21.0982	-0.333251	-0.767662	0.08585	0.380797	no
XLOC_001232	CG42556	TSS1610	chr2L:16888489-16917052	0	1.47366	0.13746	0.43234	1.14794	1.36489	0.811735	1.05738	0.943513	0.698546	0.822048	0.779877	OK	0.810996	0.510864	-0.666755	-0.0739238	0.66005	0.938182	no	OK	0.810996	1.09549	0.433808	0.0624088	0.72075	0.956955	no	OK	0.510864	1.09549	1.10056	0.128102	0.489	0.864204	no
XLOC_001233	CR45285	TSS1611	chr2L:16965474-16965767	0	0	0	0	0	0	0	0	0	0	0	0	NOTEST	0	0	0	0	1	1	no	NOTEST	0	0	0	0	1	1	no	NOTEST	0	0	0	0	1	1	no
XLOC_001234	beat-IIIb	TSS1612	chr2L:16973090-16993984	0	0.027849	0.117383	0.0273262	0.16223	0.111222	0.02279	0.11101	0.198739	0.211147	0.100718	0.115522	NOTEST	0.156531	0.0431394	-1.85937	0	1	1	no	NOTEST	0.156531	0.101813	-0.62053	0	1	1	no	NOTEST	0.0431394	0.101813	1.23884	0	1	1	no
XLOC_001235	CR44408	TSS1613	chr2L:16973090-16993984	0	0	0	0	0	0	0	0	0	0	0.139915	0	NOTEST	0.0349787	0	#NAME?	0	1	1	no	NOTEST	0.0349787	0	#NAME?	0	1	1	no	NOTEST	0	0	0	0	1	1	no
XLOC_001236	CG31806	TSS1614	chr2L:16973090-16993984	0	0	0	0	0	0	0	0	0	0	0	0	NOTEST	0	0	0	0	1	1	no	NOTEST	0	0	0	0	1	1	no	NOTEST	0	0	0	0	1	1	no
XLOC_001237	CR45356	TSS1615	chr2L:16998326-16998551	0	0	0	0	0	0	0	0	0	0	0	0	NOTEST	0	0	0	0	1	1	no	NOTEST	0	0	0	0	1	1	no	NOTEST	0	0	0	0	1	1	no
XLOC_001238	CR45357	TSS1616	chr2L:16998682-16998941	0	0	0	0	0	0	0	0	0	0	0	0	NOTEST	0	0	0	0	1	1	no	NOTEST	0	0	0	0	1	1	no	NOTEST	0	0	0	0	1	1	no
XLOC_001239	CR43819	TSS1617	chr2L:17085649-17086419	0	0	0	0	0	0	0	0	0	0	0	0	NOTEST	0	0	0	0	1	1	no	NOTEST	0	0	0	0	1	1	no	NOTEST	0	0	0	0	1	1	no
XLOC_001240	CG12620	TSS1618	chr2L:17087640-17089186	0	0	0	0	0	0	0	0	0	0	0	0	NOTEST	0	0	0	0	1	1	no	NOTEST	0	0	0	0	1	1	no	NOTEST	0	0	0	0	1	1	no
XLOC_001241	CR45448	TSS1619	chr2L:17105144-17105687	0	0	0	0	0	0	0	0	0	0	0	0	NOTEST	0	0	0	0	1	1	no	NOTEST	0	0	0	0	1	1	no	NOTEST	0	0	0	0	1	1	no
XLOC_001242	CG34106,beat-IIIa	TSS1620,TSS1621	chr2L:17131023-17173118	0.389051	0.405931	1.06998	0.327454	1.08543	0.682501	0.243787	0.869948	0.871826	0.911128	0.534831	0.677231	OK	0.748754	0.548103	-0.450045	-0.237127	0.54125	0.892244	no	OK	0.748754	0.720416	-0.0556609	-0.0379841	0.92615	0.990915	no	OK	0.548103	0.720416	0.394384	0.233388	0.5138	0.879431	no
XLOC_001243	CG34169	TSS1622	chr2L:17173480-17174105	0	0	0	0	0	0	0	0	0	0	0	0	NOTEST	0	0	0	0	1	1	no	NOTEST	0	0	0	0	1	1	no	NOTEST	0	0	0	0	1	1	no
XLOC_001244	Gr36a	TSS1623	chr2L:17176617-17177921	0	0	0	0	0	0	0	0	0	0	0	0	NOTEST	0	0	0	0	1	1	no	NOTEST	0	0	0	0	1	1	no	NOTEST	0	0	0	0	1	1	no
XLOC_001245	Gr36b	TSS1624	chr2L:17178771-17180064	0	0	0	0	0	0	0	0	0	0	0	0.0193949	NOTEST	0.00484873	0	#NAME?	0	1	1	no	NOTEST	0.00484873	0	#NAME?	0	1	1	no	NOTEST	0	0	0	0	1	1	no
XLOC_001246	Gr36c	TSS1625	chr2L:17180337-17181632	0	0	0	0	0	0	0	0	0	0	0	0	NOTEST	0	0	0	0	1	1	no	NOTEST	0	0	0	0	1	1	no	NOTEST	0	0	0	0	1	1	no
XLOC_001247	CG31750	TSS1626	chr2L:17181937-17183654	0	0	0	0	0	0	0	0	0	0	0	0	NOTEST	0	0	0	0	1	1	no	NOTEST	0	0	0	0	1	1	no	NOTEST	0	0	0	0	1	1	no
XLOC_001248	CR44395	TSS1627	chr2L:17187636-17260734	0	0	0	0	0	0	0	0	0	0	0	0	NOTEST	0	0	0	0	1	1	no	NOTEST	0	0	0	0	1	1	no	NOTEST	0	0	0	0	1	1	no
XLOC_001249	CR45729	TSS1628	chr2L:17280234-17280536	0	0	0	0	0	0	0	0	0	0	0	0	NOTEST	0	0	0	0	1	1	no	NOTEST	0	0	0	0	1	1	no	NOTEST	0	0	0	0	1	1	no
XLOC_001250	CG15140	TSS1629	chr2L:17286239-17287663	0	0	0	0	0	0	0	0	0	0	0	0	NOTEST	0	0	0	0	1	1	no	NOTEST	0	0	0	0	1	1	no	NOTEST	0	0	0	0	1	1	no
XLOC_001251	CR44345	TSS1630	chr2L:17354876-17355523	0	0	0	0	0	0	0.0724635	0.216358	1.38943	0.254573	0	0	NOTEST	0.411001	0	#NAME?	0	1	1	no	NOTEST	0.411001	0.0722055	-2.50896	0	1	1	no	NOTEST	0	0.0722055	inf	0	1	1	no
XLOC_001252	CR44346	TSS1631	chr2L:17361038-17361511	0	0	0	0	1.60762	0.177057	0.27853	0.724647	0.242668	0	0	0.237711	NOTEST	0.120095	0	#NAME?	0	1	1	no	OK	0.120095	0.696962	2.53691	0.904953	0.2579	0.671201	no	OK	0	0.696962	inf	#NAME?	0.0003	0.00585337	yes
XLOC_001253	CG31804	TSS1632	chr2L:17363495-17364351	0	0	0	0.0606947	0.405741	0.0625787	0.101314	0.189328	0.971506	0.236345	0.758216	0.34343	OK	0.577374	0.0151737	-5.24986	-0.953272	0.2429	0.656974	no	OK	0.577374	0.189741	-1.60548	-0.719823	0.14305	0.508194	no	NOTEST	0.0151737	0.189741	3.64438	0	1	1	no
XLOC_001254	CLIP-190	TSS1633,TSS1634,TSS1635,TSS1636	chr2L:17384699-17410406	40.3146	59.4478	57.0695	77.3658	41.568	43.9132	46.3749	71.9386	57.3816	62.1436	109.433	86.7624	OK	78.9303	58.5494	-0.430924	-0.897583	0.0791	0.360867	no	OK	78.9303	50.9487	-0.631534	-1.32642	0.00955	0.0850232	no	OK	58.5494	50.9487	-0.20061	-0.421454	0.4168	0.819316	no
XLOC_001255	CG15141	TSS1637	chr2L:17410640-17433161	7.78642	7.07743	9.81213	11.5313	14.6127	12.1761	15.4694	10.2678	11.4118	9.74152	13.351	10.5977	OK	11.2755	9.05182	-0.316913	-0.175035	0.72135	0.957019	no	OK	11.2755	13.1315	0.219838	0.122422	0.80355	0.973334	no	OK	9.05182	13.1315	0.536751	0.28822	0.54695	0.89582	no
XLOC_001256	CR44409	TSS1638	chr2L:17410640-17433161	0	0	1.78999	3.3324	0	0	0	0.0901044	0	0	0.317613	0.343955	OK	0.165392	1.2806	2.95286	0.152758	0.30915	0.724896	no	NOTEST	0.165392	0.0225261	-2.87622	0	1	1	no	OK	1.2806	0.0225261	-5.82908	-0.126154	0.31705	0.733555	no
XLOC_001257	CG5043	TSS1639	chr2L:17433861-17435800	0	0	0.226863	0.0792534	0	0.026977	0	0.0330054	0.076861	0.102282	0.194574	0.0745315	NOTEST	0.112062	0.0765291	-0.550218	0	1	1	no	NOTEST	0.112062	0.0149956	-2.90168	0	1	1	no	NOTEST	0.0765291	0.0149956	-2.35147	0	1	1	no
XLOC_001258	CG5050	TSS1640,TSS1641	chr2L:17452923-17458775	8.56086	7.03462	2.61793	4.56923	1.95975	2.21556	1.90825	6.1889	3.03418	4.15593	4.15515	3.73537	OK	3.77016	5.69566	0.595238	0.589622	0.2443	0.658685	no	OK	3.77016	3.06811	-0.297272	-0.260742	0.62085	0.925359	no	OK	5.69566	3.06811	-0.89251	-0.79699	0.14305	0.508194	no
XLOC_001259	Sgt	TSS1642,TSS1643	chr2L:17459604-17474773	61.9305	66.8125	65.2269	71.9908	83.3848	87.9661	81.4765	69.8645	76.0879	80.4913	63.8065	71.5562	OK	72.9855	66.4902	-0.134468	-0.198995	0.6846	0.946267	no	OK	72.9855	80.673	0.144476	0.234021	0.64055	0.932482	no	OK	66.4902	80.673	0.278944	0.422104	0.40065	0.807364	no
XLOC_001260	CG5110	TSS1644	chr2L:17481230-17484307	22.1687	36.9661	19.6096	21.3578	20.5307	18.5605	19.8449	20.1488	20.393	15.1573	22.1986	20.057	OK	19.4515	25.0256	0.363523	0.330953	0.52875	0.885874	no	OK	19.4515	19.7712	0.0235229	0.0198987	0.96835	0.995442	no	OK	25.0256	19.7712	-0.34	-0.292873	0.58175	0.910967	no
XLOC_001261	CG5131	TSS1645	chr2L:17484500-17485624	2.73814	9.51634	10.0784	7.39428	10.7326	8.86121	9.37386	6.36096	7.03438	9.71448	10.2842	7.59075	OK	8.65596	7.43179	-0.219985	-0.297063	0.55735	0.900598	no	OK	8.65596	8.83215	0.029071	0.0404423	0.93575	0.992476	no	OK	7.43179	8.83215	0.249056	0.3357	0.5074	0.876747	no
XLOC_001262	CG43221	TSS1646	chr2L:17485779-17486005	0	0	0	0	0	0	0	0	0	0	0	0	NOTEST	0	0	0	0	1	1	no	NOTEST	0	0	0	0	1	1	no	NOTEST	0	0	0	0	1	1	no
XLOC_001263	CG43645	TSS1647	chr2L:17486120-17486365	0	0	0	0	0	0	0	0	0	0	0	1.57726	NOTEST	0.394314	0	#NAME?	0	1	1	no	NOTEST	0.394314	0	#NAME?	0	1	1	no	NOTEST	0	0	0	0	1	1	no
XLOC_001264	CG43220	TSS1648	chr2L:17486596-17486779	0	0	0	0	0	0	0	0	0	0	0	0	NOTEST	0	0	0	0	1	1	no	NOTEST	0	0	0	0	1	1	no	NOTEST	0	0	0	0	1	1	no
XLOC_001265	CR45715	TSS1649	chr2L:17486805-17497697	0	0	0	0	0.107811	0	0.267795	0	0	0	0	0.113614	NOTEST	0.0284035	0	#NAME?	0	1	1	no	NOTEST	0.0284035	0.0939014	1.72508	0	1	1	no	NOTEST	0	0.0939014	inf	0	1	1	no
XLOC_001266	Dhc36C	TSS1650	chr2L:17501400-17525515	0.0754798	0.0998408	0.0970384	0.0280332	0.138294	0.163557	0.154866	0.164316	0.0662558	0.0810917	0.0465276	0.192421	NOTEST	0.0965739	0.075098	-0.362859	0	1	1	no	NOTEST	0.0965739	0.155258	0.684964	0	1	1	no	NOTEST	0.075098	0.155258	1.04782	0	1	1	no
XLOC_001267	CR43304	TSS1651	chr2L:17541853-17542383	0	0	0	0	0	0	0	0	0	0	0	0	NOTEST	0	0	0	0	1	1	no	NOTEST	0	0	0	0	1	1	no	NOTEST	0	0	0	0	1	1	no
XLOC_001268	CR45697	TSS1652	chr2L:17547184-17547849	0	0	0	0	0	0	0	0	0	0	0	0	NOTEST	0	0	0	0	1	1	no	NOTEST	0	0	0	0	1	1	no	NOTEST	0	0	0	0	1	1	no
XLOC_001269	mir-124	TSS1653	chr2L:17566369-17566469	0	0	0	0	0	0	0	0	0	0	0	0	NOTEST	0	0	0	0	1	1	no	NOTEST	0	0	0	0	1	1	no	NOTEST	0	0	0	0	1	1	no
XLOC_001270	mir-287	TSS1654	chr2L:17574609-17574702	0	0	0	0	0	0	0	0	0	0	0	0	NOTEST	0	0	0	0	1	1	no	NOTEST	0	0	0	0	1	1	no	NOTEST	0	0	0	0	1	1	no
XLOC_001271	CR45698	TSS1655	chr2L:17579477-17580006	0	0	0	0	0	0	0	0	0	0	0	0	NOTEST	0	0	0	0	1	1	no	NOTEST	0	0	0	0	1	1	no	NOTEST	0	0	0	0	1	1	no
XLOC_001272	CR45111	TSS1656	chr2L:17583908-17584468	0	0	0	0	0	0	0	0	0	0	0	0	NOTEST	0	0	0	0	1	1	no	NOTEST	0	0	0	0	1	1	no	NOTEST	0	0	0	0	1	1	no
XLOC_001273	Oli	TSS1657,TSS1658,TSS1659	chr2L:17589183-17591267	1.84698	0.571633	0.39914	0.465109	1.11481	0.286577	0.635145	0.725806	0.676713	0	0.239469	0.190619	OK	0.2767	0.820715	1.56856	0.887864	0.2277	0.640236	no	OK	0.2767	0.690585	1.31949	0.74632	0.2851	0.701684	no	OK	0.820715	0.690585	-0.249064	-0.168973	0.70885	0.953898	no
XLOC_001274	Sytalpha	TSS1660,TSS1661,TSS1662	chr2L:17591314-17604387	48.5401	30.5409	57.0211	25.375	61.8151	35.2209	40.5484	76.3752	31.3121	19.0206	24.1601	37.3149	OK	27.9519	40.3693	0.530309	1.27483	0.00995	0.0876574	no	OK	27.9519	53.4899	0.936319	2.27787	5e-05	0.00129868	yes	OK	40.3693	53.4899	0.40601	0.994865	0.0504	0.273168	no
XLOC_001275	CG43054	TSS1663	chr2L:17627858-17628389	0	0	0	0	0	0	0	0	0	0	0	0	NOTEST	0	0	0	0	1	1	no	NOTEST	0	0	0	0	1	1	no	NOTEST	0	0	0	0	1	1	no
XLOC_001276	CG43231	TSS1664	chr2L:17647052-17778340	0	0	0	0	0	0	0	0	0	0	0	0	NOTEST	0	0	0	0	1	1	no	NOTEST	0	0	0	0	1	1	no	NOTEST	0	0	0	0	1	1	no
XLOC_001277	CR43419	TSS1665	chr2L:17786970-17875247	0	0	0	0	0	0	0	0	0	0	0	0	NOTEST	0	0	0	0	1	1	no	NOTEST	0	0	0	0	1	1	no	NOTEST	0	0	0	0	1	1	no
XLOC_001278	CR43420	TSS1666	chr2L:17893811-17894734	0.400161	0	0	0	0	0	0	0	0	0	0	0	NOTEST	0	0.10004	inf	0	1	1	no	NOTEST	0	0	0	0	1	1	no	NOTEST	0.10004	0	#NAME?	0	1	1	no
XLOC_001279	CG5674	TSS1667	chr2L:17962624-17982472	11.9588	15.2615	15.333	15.8434	12.4057	12.2449	13.8389	12.8585	11.6997	13.7408	15.665	14.4427	OK	13.887	14.5992	0.0721505	0.159064	0.74485	0.962276	no	OK	13.887	12.837	-0.113431	-0.246707	0.62015	0.925113	no	OK	14.5992	12.837	-0.185581	-0.408495	0.41635	0.818966	no
XLOC_001280	CG5681	TSS1668	chr2L:17986398-17988619	0	0	0	0.147151	0.0833732	0.0214342	0.017534	0.131345	0	0	0.0154885	0.0988021	NOTEST	0.0285726	0.0367877	0.364589	0	1	1	no	NOTEST	0.0285726	0.0634215	1.15034	0	1	1	no	NOTEST	0.0367877	0.0634215	0.785749	0	1	1	no
XLOC_001281	Prosbeta5R2	TSS1669	chr2L:17990417-17991951	0	0	0	0.0614544	0	0	0.0512669	0	0	0	0	0.0289066	NOTEST	0.00722666	0.0153636	1.08812	0	1	1	no	NOTEST	0.00722666	0.0128167	0.826626	0	1	1	no	NOTEST	0.0153636	0.0128167	-0.261489	0	1	1	no
XLOC_001282	CR44604	TSS1670	chr2L:18002846-18003083	0	0	0	0	0	0	0	0	0	0	0	0	NOTEST	0	0	0	0	1	1	no	NOTEST	0	0	0	0	1	1	no	NOTEST	0	0	0	0	1	1	no
XLOC_001283	CR44605	TSS1671	chr2L:18003367-18003616	0	0	0	0	0	0	0	0	0	0	0	0	NOTEST	0	0	0	0	1	1	no	NOTEST	0	0	0	0	1	1	no	NOTEST	0	0	0	0	1	1	no
XLOC_001284	CG5693	TSS1672	chr2L:18006626-18007216	0	0	0	0	0	0	0	0	0	0	0	0	NOTEST	0	0	0	0	1	1	no	NOTEST	0	0	0	0	1	1	no	NOTEST	0	0	0	0	1	1	no
XLOC_001285	CG42659	TSS1673	chr2L:18007359-18007842	0	0	0	0	0	0	0	0	0	0	0	0	NOTEST	0	0	0	0	1	1	no	NOTEST	0	0	0	0	1	1	no	NOTEST	0	0	0	0	1	1	no
XLOC_001286	CG31740,CG42635	TSS1674,TSS1675	chr2L:18007934-18011475	0	0	0	1.04256	2.04739	0.692008	0.237441	0.118106	0	1.39197	0	0.451228	NOTEST	0.4608	0.260641	-0.822076	0	1	1	no	OK	0.4608	0.773737	0.747703	0.375833	0.6465	0.933581	no	OK	0.260641	0.773737	1.56978	0.703959	0.38455	0.793284	no
XLOC_001287	rdo	TSS1676	chr2L:18012379-18070246	0.458334	0.708743	0.022127	0.0811513	0.168162	0.117901	0.299752	0.108694	0.1855	0.335834	0.111115	0.157911	NOTEST	0.19759	0.317589	0.68465	0	1	1	no	NOTEST	0.19759	0.173627	-0.186518	0	1	1	no	NOTEST	0.317589	0.173627	-0.871168	0	1	1	no
XLOC_001288	Arr1	TSS1677,TSS1678	chr2L:18078268-18081307	0	0	0	0	0	0	0	0	0	0	0	0	NOTEST	0	0	0	0	1	1	no	NOTEST	0	0	0	0	1	1	no	NOTEST	0	0	0	0	1	1	no
XLOC_001289	ninaD	TSS1679	chr2L:18081627-18083608	0	0	13.9838	0.0714427	0	0	0	0	0	0	0	0	OK	0	3.5138	inf	#NAME?	0.03	0.193225	no	NOTEST	0	0	0	0	1	1	no	OK	3.5138	0	#NAME?	#NAME?	0.0286	0.187113	no
XLOC_001290	CG31741	TSS1680	chr2L:18084255-18086714	0	0	0	0	0	0	0	0	0	0	0	0	NOTEST	0	0	0	0	1	1	no	NOTEST	0	0	0	0	1	1	no	NOTEST	0	0	0	0	1	1	no
XLOC_001291	CG5755	TSS1681	chr2L:18096567-18098120	0	0	0	0.0303078	0	0	0	0	0	0.322902	0	0	NOTEST	0.0807255	0.00757696	-3.41333	0	1	1	no	NOTEST	0.0807255	0	#NAME?	0	1	1	no	NOTEST	0.00757696	0	#NAME?	0	1	1	no
XLOC_001292	CG15152	TSS1682,TSS1683	chr2L:18114546-18115220	19.0816	41.618	11.9804	10.1765	0.710282	1.75254	0.788606	5.61939	4.88691	4.8361	1.30673	2.03556	OK	3.26633	20.7141	2.66488	2.64362	5e-05	0.00129868	yes	OK	3.26633	2.21771	-0.558601	-0.412868	0.3502	0.764882	no	OK	20.7141	2.21771	-3.22348	-2.76838	5e-05	0.00129868	yes
XLOC_001293	CG5758	TSS1684,TSS1685,TSS1686	chr2L:18119994-18129862	4.88125	2.56609	2.7477	2.17238	2.10018	1.11994	1.22775	2.53904	3.71354	1.91902	1.69616	1.26655	OK	2.14882	3.09186	0.524931	0.722052	0.1495	0.518402	no	OK	2.14882	1.74673	-0.298886	-0.373782	0.45075	0.840063	no	OK	3.09186	1.74673	-0.823817	-1.09076	0.0311	0.197949	no
XLOC_001294	CR44478	TSS1687	chr2L:18138674-18152417	7.06172	19.3587	8.63192	14.3377	8.45721	7.63792	9.5021	11.4055	12.2275	15.101	17.341	8.23911	OK	13.2272	12.3475	-0.0992845	-0.013667	0.93875	0.992833	no	OK	13.2272	9.25067	-0.515874	-0.075227	0.6741	0.942726	no	OK	12.3475	9.25067	-0.41659	-0.0543552	0.7382	0.960361	no
XLOC_001295	CG17681	TSS1688	chr2L:18153122-18154516	0.94992	1.38573	1.65117	1.73114	1.04972	1.50349	1.47572	1.22194	0.985522	1.3868	2.52045	1.57635	OK	1.61728	1.42949	-0.178071	-0.150882	0.76775	0.966968	no	OK	1.61728	1.31272	-0.301013	-0.25689	0.61685	0.923968	no	OK	1.42949	1.31272	-0.122942	-0.105355	0.83625	0.979177	no
XLOC_001296	CG15155	TSS1689	chr2L:18154850-18155942	0	0	0.809394	1.01903	0.226699	0.291367	0.566938	0.28243	1.48286	0.44049	0.789193	0.747309	OK	0.864962	0.457107	-0.920105	-0.571375	0.482	0.859314	no	OK	0.864962	0.341859	-1.33924	-0.826238	0.1481	0.515701	no	NOTEST	0.457107	0.341859	-0.419133	0	1	1	no
XLOC_001297	CG5783	TSS1690	chr2L:18156042-18159272	15.781	16.9284	8.68259	11.9842	10.6592	10.1383	10.0011	9.73888	10.075	10.5127	8.73249	8.96057	OK	9.57018	13.344	0.479576	0.602729	0.23075	0.64399	no	OK	9.57018	10.1343	0.0826359	0.0998431	0.84495	0.980818	no	OK	13.344	10.1343	-0.39694	-0.492361	0.32495	0.741828	no
XLOC_001298	CR43413	TSS1691	chr2L:18159810-18275770	0	0	0	0	0	0	0	0	0	0	0	0	NOTEST	0	0	0	0	1	1	no	NOTEST	0	0	0	0	1	1	no	NOTEST	0	0	0	0	1	1	no
XLOC_001299	CG43406	TSS1692	chr2L:18159810-18275770	0	0	0	0	0	0	0	0	0	0	0	0	NOTEST	0	0	0	0	1	1	no	NOTEST	0	0	0	0	1	1	no	NOTEST	0	0	0	0	1	1	no
XLOC_001300	CR43408	TSS1693	chr2L:18159810-18275770	0	0	0	0	0	0	0	0	0	0	0	0	NOTEST	0	0	0	0	1	1	no	NOTEST	0	0	0	0	1	1	no	NOTEST	0	0	0	0	1	1	no
XLOC_001301	CR44693	TSS1694	chr2L:18291681-18292092	0	0	0	0	0	0	0	0	0	0	0	0	NOTEST	0	0	0	0	1	1	no	NOTEST	0	0	0	0	1	1	no	NOTEST	0	0	0	0	1	1	no
XLOC_001302	Sfp36F	TSS1695	chr2L:18292521-18292833	0	0	0	0	0	0	0	0	0	0	0	0	NOTEST	0	0	0	0	1	1	no	NOTEST	0	0	0	0	1	1	no	NOTEST	0	0	0	0	1	1	no
XLOC_001303	CG5790	TSS1696	chr2L:18294839-18297347	0	0	0	0	0	0	0	0	0	0	0	0	NOTEST	0	0	0	0	1	1	no	NOTEST	0	0	0	0	1	1	no	NOTEST	0	0	0	0	1	1	no
XLOC_001304	CR44694	TSS1697	chr2L:18309628-18310010	0	0	0	0	0	0	0	0	0	0	0	0	NOTEST	0	0	0	0	1	1	no	NOTEST	0	0	0	0	1	1	no	NOTEST	0	0	0	0	1	1	no
XLOC_001305	CR44695	TSS1698	chr2L:18310102-18310502	0	0	0	0	0	0	0	0	0	0	0	0	NOTEST	0	0	0	0	1	1	no	NOTEST	0	0	0	0	1	1	no	NOTEST	0	0	0	0	1	1	no
XLOC_001306	CR45721	TSS1699	chr2L:18310878-18311356	0	0	0	0	0	0	0	0	0	0.262178	0	0	NOTEST	0.0655445	0	#NAME?	0	1	1	no	NOTEST	0.0655445	0	#NAME?	0	1	1	no	NOTEST	0	0	0	0	1	1	no
XLOC_001307	Fas3	TSS1700	chr2L:18320101-18393441	6.39051	8.60263	6.54565	4.64726	16.5922	19.3242	13.7235	26.7205	7.6955	12.599	14.6739	10.4048	OK	11.3433	6.54651	-0.793045	-1.48033	0.00435	0.0480734	yes	OK	11.3433	19.0901	0.750982	1.61094	0.0021	0.0274092	yes	OK	6.54651	19.0901	1.54403	3.03968	5e-05	0.00129868	yes
XLOC_001308	CG34171	TSS1701	chr2L:18320101-18393441	0	0	0	0	0.322678	0	0.0337555	0	0.117638	0	0.118975	0	NOTEST	0.0591531	0	#NAME?	0	1	1	no	NOTEST	0.0591531	0.0891083	0.591106	0	1	1	no	NOTEST	0	0.0891083	inf	0	1	1	no
XLOC_001309	CR44486	TSS1702	chr2L:18400461-18401232	0	0	0	0	0	0	0	0	0	0	0	0	NOTEST	0	0	0	0	1	1	no	NOTEST	0	0	0	0	1	1	no	NOTEST	0	0	0	0	1	1	no
XLOC_001310	CR44487	TSS1703	chr2L:18403947-18404600	0	0	0	0	0	0.257277	0	0	0	0	0	0	NOTEST	0	0	0	0	1	1	no	NOTEST	0	0.0643192	inf	0	1	1	no	NOTEST	0	0.0643192	inf	0	1	1	no
XLOC_001311	CR44488	TSS1704	chr2L:18433458-18434096	0	0	0	0	0	0	0	0.165319	0	0	0	0.125365	NOTEST	0.0313412	0	#NAME?	0	1	1	no	NOTEST	0.0313412	0.0413298	0.399122	0	1	1	no	NOTEST	0	0.0413298	inf	0	1	1	no
XLOC_001312	Ntf-2r	TSS1705	chr2L:18454648-18455419	0	0	0	0.138299	0.278027	0.142933	0.115443	0	0	0.134825	0	0.163142	NOTEST	0.0744918	0.0345748	-1.10736	0	1	1	no	NOTEST	0.0744918	0.134101	0.848165	0	1	1	no	NOTEST	0.0345748	0.134101	1.95553	0	1	1	no
XLOC_001313	let-7,let-7-C,mir-100,mir-125	TSS1706,TSS1707,TSS1708,TSS1709	chr2L:18455716-18484513	1.32656	1.20361	1.33785	1.30924	280.513	131.42	18.8523	0.795061	0.697405	215.167	1.31811	0.649879	OK	54.458	1.29431	-5.39489	-2.39273	0.0413	0.238141	no	OK	54.458	107.895	0.986415	3.07748	0.52565	0.885105	no	OK	1.29431	107.895	6.3813	2.82114	0.03295	0.205028	no
XLOC_001314	CG10176	TSS1710	chr2L:18485416-18503978	0	0.635027	0.568732	0.336893	0.258944	0.343976	0.0362982	0.0323776	0.60138	0	0	0.0852944	NOTEST	0.171669	0.385163	1.16584	0	1	1	no	NOTEST	0.171669	0.167899	-0.0320328	0	1	1	no	NOTEST	0.385163	0.167899	-1.19787	0	1	1	no
XLOC_001315	CG10178	TSS1711	chr2L:18509559-18513512	0.346318	0.294613	0.413139	0.745645	17.4727	16.8388	13.0616	2.91524	6.64814	3.58399	2.10852	4.41011	OK	4.18769	0.449929	-3.21839	-2.85936	5e-05	0.00129868	yes	OK	4.18769	12.5721	1.586	2.49115	5e-05	0.00129868	yes	OK	0.449929	12.5721	4.80438	4.48834	5e-05	0.00129868	yes
XLOC_001316	CG10211	TSS1712	chr2L:18517486-18531967	0	0	0.116543	0.0755538	0.188001	0.203779	0.152695	0.0817541	0.253643	0.0841447	0.0321458	0.0900655	NOTEST	0.115	0.0480241	-1.2598	0	1	1	no	NOTEST	0.115	0.156557	0.445061	0	1	1	no	NOTEST	0.0480241	0.156557	1.70486	0	1	1	no
XLOC_001317	CG15160	TSS1713	chr2L:18590890-18595429	6.77482	7.58412	11.7134	8.57312	11.5231	11.843	12.6378	11.8427	10.6174	14.0877	12.5158	11.1219	OK	12.0857	8.66136	-0.480635	-0.993474	0.04845	0.265871	no	OK	12.0857	11.9617	-0.0148837	-0.0323571	0.94815	0.993315	no	OK	8.66136	11.9617	0.465751	0.964234	0.05315	0.283088	no
XLOC_001318	CG31789	TSS1714	chr2L:18605927-18606684	0	0	0	0	0	0	0	0	0	0	0	0	NOTEST	0	0	0	0	1	1	no	NOTEST	0	0	0	0	1	1	no	NOTEST	0	0	0	0	1	1	no
XLOC_001319	CG10333	TSS1715	chr2L:18606831-18609550	15.2033	14.8283	15.5593	15.6589	17.2833	19.4786	18.2786	17.267	15.4228	19.6592	17.747	16.6134	OK	17.3606	15.3124	-0.181112	-0.410989	0.4022	0.808596	no	OK	17.3606	18.0769	0.0583293	0.133621	0.7873	0.970369	no	OK	15.3124	18.0769	0.239442	0.542406	0.27625	0.691906	no
XLOC_001320	MESR3	TSS1716	chr2L:18617255-18661776	19.9765	12.6028	24.2085	13.7106	35.3535	33.4605	28.6112	50.4762	35.9547	45.399	54.8491	30.2006	OK	41.6009	17.6246	-1.23902	-2.8046	5e-05	0.00129868	yes	OK	41.6009	36.9753	-0.170049	-0.412722	0.4128	0.816218	no	OK	17.6246	36.9753	1.06897	2.40362	5e-05	0.00129868	yes
XLOC_001321	CG31751	TSS1717,TSS1718	chr2L:18677220-18683715	1.65737	1.18948	4.62985	2.8016	1.29712	1.73078	2.42238	3.37165	0.740277	1.4883	3.60429	1.42581	OK	1.81467	2.56957	0.501822	0.483443	0.356	0.769033	no	OK	1.81467	2.20548	0.281388	0.252612	0.6365	0.931253	no	OK	2.56957	2.20548	-0.220435	-0.218275	0.69105	0.94795	no
XLOC_001322	CG10336	TSS1719,TSS1720	chr2L:18689527-18695602	2.5087	1.30927	1.60664	2.11932	10.0374	7.72618	6.28495	2.38715	5.99222	2.28876	3.11905	3.51995	OK	3.73	1.88598	-0.983859	-0.283465	0.57805	0.909195	no	OK	3.73	6.60893	0.825242	0.317594	0.6522	0.935267	no	OK	1.88598	6.60893	1.8091	0.553924	0.2195	0.629282	no
XLOC_001323	CG10338	TSS1721	chr2L:18695663-18698571	3.25724	2.39733	2.27993	3.50624	4.65973	2.90525	3.31011	3.71903	4.39971	3.76222	4.50206	4.04649	OK	4.17762	2.86018	-0.546574	-0.760183	0.12955	0.483393	no	OK	4.17762	3.64853	-0.195367	-0.288869	0.5637	0.903302	no	OK	2.86018	3.64853	0.351207	0.474792	0.34295	0.758364	no
XLOC_001324	CG10341	TSS1722	chr2L:18698713-18703105	11.7983	12.7795	24.6918	19.4481	29.3839	28.9536	28.7184	27.9434	35.8129	45.5933	35.6387	33.717	OK	37.6905	17.1794	-1.13352	-0.636616	0.2709	0.685101	no	OK	37.6905	28.7498	-0.390646	-0.366912	0.4564	0.843299	no	OK	17.1794	28.7498	0.742875	0.413573	0.40575	0.811118	no
XLOC_001325	CG10343	TSS1723	chr2L:18703472-18704454	31.3226	25.0172	26.2897	24.4931	31.2689	24.7513	28.7543	25.2735	25.6507	35.5923	30.8133	24.2088	OK	29.0663	26.7807	-0.118155	-0.220703	0.65695	0.936799	no	OK	29.0663	27.512	-0.0792863	-0.148215	0.76615	0.966857	no	OK	26.7807	27.512	0.0388689	0.0719155	0.8841	0.985612	no
XLOC_001326	Grip71	TSS1724	chr2L:18708845-18713748	1.86593	2.44189	3.02706	2.85259	3.0846	2.96873	4.27609	3.36537	4.38164	2.89312	3.4542	2.74685	OK	3.36895	2.54687	-0.403576	-0.506911	0.30545	0.721659	no	OK	3.36895	3.4237	0.0232536	0.0321685	0.9482	0.993315	no	OK	2.54687	3.4237	0.42683	0.536854	0.27695	0.692992	no
XLOC_001327	CR44768	TSS1725	chr2L:18714452-18733323	0	0	0.287576	0	0	0	0	0	0	0	0	0	NOTEST	0	0.0718941	inf	0	1	1	no	NOTEST	0	0	0	0	1	1	no	NOTEST	0.0718941	0	#NAME?	0	1	1	no
XLOC_001328	CR44769	TSS1726	chr2L:18735747-18736130	0	0	0	0	0	0	0	0	0	0.188851	0	0.180834	NOTEST	0.0924211	0	#NAME?	0	1	1	no	NOTEST	0.0924211	0	#NAME?	0	1	1	no	NOTEST	0	0	0	0	1	1	no
XLOC_001329	CG15167	TSS1727	chr2L:18740357-18740807	0	0	0	0	0	0	0	0	0	0	0	0	NOTEST	0	0	0	0	1	1	no	NOTEST	0	0	0	0	1	1	no	NOTEST	0	0	0	0	1	1	no
XLOC_001330	CG17325,CG42305	TSS1728,TSS1729	chr2L:18812647-18813941	0	0	0	0	0	0	0	0.159006	0	0.166243	0.12477	0.0803507	NOTEST	0.092841	0	#NAME?	0	1	1	no	NOTEST	0.092841	0.0397514	-1.22375	0	1	1	no	NOTEST	0	0.0397514	inf	0	1	1	no
XLOC_001331	CG17324	TSS1730	chr2L:18819343-18822573	0	0	0.106	0	0.0735766	0	0	0.0173491	0	0	0	0	NOTEST	0	0.0265	inf	0	1	1	no	NOTEST	0	0.0227314	inf	0	1	1	no	NOTEST	0.0265	0.0227314	-0.221302	0	1	1	no
XLOC_001332	CG17323	TSS1731	chr2L:18823547-18826716	3.40469	5.99503	2.78082	3.80373	0.432786	0.594551	0.330503	0.713801	0.237326	0.405872	0.497946	0.646504	OK	0.446912	3.99607	3.16052	2.82355	5e-05	0.00129868	yes	OK	0.446912	0.51791	0.212712	0.151817	0.755	0.963735	no	OK	3.99607	0.51791	-2.94781	-2.64713	0.0001	0.00237535	yes
XLOC_001333	CG17322	TSS1732	chr2L:18826769-18831153	0.276829	0.837401	0.440167	0.768923	0.407141	0.0996966	0.106881	0.144085	0	0	0.143926	0.229795	OK	0.0934302	0.58083	2.63616	0.611571	0.1113	0.442771	no	NOTEST	0.0934302	0.189451	1.01986	0	1	1	no	OK	0.58083	0.189451	-1.61629	-0.427692	0.2719	0.686356	no
XLOC_001334	ScpX	TSS1733	chr2L:18831228-18833630	9.87792	13.7555	15.5937	12.7647	8.78635	8.70195	11.7512	11.2193	8.66066	12.375	12.94	9.49126	OK	10.8667	12.9979	0.258366	0.489297	0.32215	0.738973	no	OK	10.8667	10.1147	-0.103465	-0.189472	0.6972	0.949811	no	OK	12.9979	10.1147	-0.361831	-0.681487	0.16185	0.541069	no
XLOC_001335	CG17321	TSS1734	chr2L:18845183-18855110	14.9834	8.5909	7.61632	4.14618	6.18207	3.2802	2.45887	7.36957	4.76999	2.22987	3.23193	3.83539	OK	3.5168	8.83421	1.32884	2.03672	0.0004	0.00737706	yes	OK	3.5168	4.82268	0.455573	0.662199	0.1929	0.590648	no	OK	8.83421	4.82268	-0.873266	-1.42464	0.0057	0.0589419	no
XLOC_001336	CR44737	TSS1735	chr2L:18893610-18896798	0	0	0	0	0	0	0	0.0234863	0	0	0	0	NOTEST	0	0	0	0	1	1	no	NOTEST	0	0.00587157	inf	0	1	1	no	NOTEST	0	0.00587157	inf	0	1	1	no
XLOC_001337	CR44738	TSS1736	chr2L:18906123-18906747	0	0	0	0.338286	0.612132	0	0	0.28084	0	0	0.247724	0	NOTEST	0.0619311	0.0845715	0.449507	0	1	1	no	NOTEST	0.0619311	0.223243	1.84988	0	1	1	no	NOTEST	0.0845715	0.223243	1.40037	0	1	1	no
XLOC_001338	CR44740	TSS1737	chr2L:18945699-18946154	0	0	0	0	0	0	0	0	0	0	0.209606	0	NOTEST	0.0524014	0	#NAME?	0	1	1	no	NOTEST	0.0524014	0	#NAME?	0	1	1	no	NOTEST	0	0	0	0	1	1	no
XLOC_001339	CR42848	TSS1738	chr2L:18946298-18947088	0	0	0.191699	0	0	0	0	0	0	0.261416	0	0	NOTEST	0.065354	0.0479246	-0.447509	0	1	1	no	NOTEST	0.065354	0	#NAME?	0	1	1	no	NOTEST	0.0479246	0	#NAME?	0	1	1	no
XLOC_001340	CG10428	TSS1739	chr2L:18948883-18950973	14.0646	16.1978	16.7213	14.1671	18.8083	21.1108	18.4358	14.9759	19.5626	19.7373	17.3406	17.4788	OK	18.5298	15.2877	-0.277476	-0.585687	0.2244	0.636004	no	OK	18.5298	18.3327	-0.0154281	-0.0332565	0.9473	0.993315	no	OK	15.2877	18.3327	0.262048	0.550884	0.2659	0.678995	no
XLOC_001341	CR44741	TSS1740	chr2L:18954583-18954970	0	0	0	0.372781	0	0	0.155856	0.347246	0	0	0	0	NOTEST	0	0.0931953	inf	0	1	1	no	NOTEST	0	0.125775	inf	0	1	1	no	NOTEST	0.0931953	0.125775	0.432521	0	1	1	no
XLOC_001342	Tango6	TSS1741	chr2L:18969027-18974448	3.76732	2.99708	4.7915	5.59842	4.91294	5.39727	5.38658	4.09481	4.45841	5.69618	5.15219	5.43658	OK	5.18584	4.28858	-0.274078	-0.371442	0.45655	0.843412	no	OK	5.18584	4.9479	-0.0677612	-0.0926273	0.8544	0.981712	no	OK	4.28858	4.9479	0.206317	0.2824	0.5812	0.910703	no
XLOC_001343	CG10431	TSS1742	chr2L:18974709-18987280	0.544259	0.102874	0.963023	0.706298	0.954803	0.75354	0.771382	0.809146	0.307383	0.698768	0.892467	0.553073	OK	0.612923	0.579114	-0.0818593	-0.0204422	0.96145	0.994712	no	OK	0.612923	0.822218	0.423815	0.122001	0.79955	0.973272	no	OK	0.579114	0.822218	0.505675	0.129432	0.79595	0.972151	no
XLOC_001344	CG15168	TSS1743	chr2L:18987706-18990233	27.888	29.0613	36.2221	29.684	39.7618	37.0823	39.0644	37.2616	36.17	40.5137	31.1295	31.0461	OK	34.7148	30.7139	-0.176663	-0.257325	0.60705	0.92061	no	OK	34.7148	38.2925	0.14151	0.211007	0.6702	0.94192	no	OK	30.7139	38.2925	0.318172	0.479352	0.33475	0.751553	no
XLOC_001345	CG15169	TSS1744	chr2L:18991019-18992409	0	1.19316	0.360193	0.205961	0	0.702624	0.400932	0.621671	0.499393	0.365967	0.0758078	0.629899	NOTEST	0.392767	0.439828	0.163266	0	1	1	no	NOTEST	0.392767	0.431307	0.135042	0	1	1	no	NOTEST	0.439828	0.431307	-0.028224	0	1	1	no
XLOC_001346	CG31792	TSS1745	chr2L:18997447-19002713	0.260358	0.168704	0.26682	0.828108	1.187	1.30535	0.923502	1.03524	1.14428	0.519609	0.839547	1.01078	OK	0.878555	0.380998	-1.20535	-1.13049	0.0217	0.153933	no	OK	0.878555	1.11277	0.340956	0.386235	0.4474	0.838139	no	OK	0.380998	1.11277	1.54631	1.49527	0.0047	0.0508613	no
XLOC_001347	CG31793	TSS1746	chr2L:19003366-19009306	5.33436	3.22182	4.40686	3.87753	5.33293	5.48988	4.8626	5.03841	5.45062	3.72216	3.35225	5.91893	OK	4.61099	4.21014	-0.131207	-0.0513104	0.9135	0.98972	no	OK	4.61099	5.18096	0.168142	0.0679057	0.89055	0.986298	no	OK	4.21014	5.18096	0.29935	0.124242	0.81495	0.975384	no
XLOC_001348	robl37BC	TSS1747	chr2L:19010865-19011532	0	0	0	0	0	0	0	0	0	0	0	0	NOTEST	0	0	0	0	1	1	no	NOTEST	0	0	0	0	1	1	no	NOTEST	0	0	0	0	1	1	no
XLOC_001349	CR45292	TSS1748	chr2L:19011901-19012254	0	0	0	0	0	0	0	0	0	0	0	0	NOTEST	0	0	0	0	1	1	no	NOTEST	0	0	0	0	1	1	no	NOTEST	0	0	0	0	1	1	no
XLOC_001350	CG15172	TSS1749,TSS1750	chr2L:19022416-19023646	0	0	0	0	0	0	0.0852776	0	0	0.0881699	0	0	NOTEST	0.0220425	0	#NAME?	0	1	1	no	NOTEST	0.0220425	0.0213194	-0.0481206	0	1	1	no	NOTEST	0	0.0213194	inf	0	1	1	no
XLOC_001351	Side	TSS1751	chr2L:19027709-19030780	0.299562	0.467175	0.297959	0.166513	0.0275153	0.0212215	0.0694439	0.299115	0.0605547	0.0402553	0.107351	0.0489128	NOTEST	0.0642686	0.307802	2.25982	0	1	1	no	NOTEST	0.0642686	0.104324	0.698884	0	1	1	no	NOTEST	0.307802	0.104324	-1.56094	0	1	1	no
XLOC_001352	mib2	TSS1752,TSS1753,TSS1754	chr2L:19033656-19041541	44.6581	45.9511	33.0932	35.8157	41.116	45.8884	39.393	35.8785	39.5216	36.5412	38.7543	34.4596	OK	37.3192	39.8795	0.0957315	0.245468	0.625	0.927307	no	OK	37.3192	40.569	0.120461	0.312698	0.5294	0.885882	no	OK	39.8795	40.569	0.0247291	0.0639106	0.8955	0.987025	no
XLOC_001353	Catsup	TSS1755	chr2L:19041861-19045148	28.567	36.3859	33.366	33.7622	24.4664	23.0754	31.1634	22.2729	26.9533	27.2108	29.8583	31.4177	OK	28.86	33.0203	0.19428	0.432406	0.3852	0.794121	no	OK	28.86	25.2445	-0.193103	-0.414797	0.4102	0.814439	no	OK	33.0203	25.2445	-0.387383	-0.844922	0.09015	0.392272	no
XLOC_001354	Acn	TSS1756	chr2L:19045354-19048817	51.5952	52.4979	57.8925	59.8076	46.9488	46.7424	51.0584	51.2002	52.2986	49.9426	65.3374	52.6283	OK	55.0517	55.4483	0.0103546	0.0272463	0.957	0.99373	no	OK	55.0517	48.9874	-0.168376	-0.442773	0.36775	0.77975	no	OK	55.4483	48.9874	-0.178731	-0.468462	0.3491	0.764053	no
XLOC_001355	CG10470	TSS1757	chr2L:19049075-19051612	11.6089	14.1477	20.1623	19.9181	29.0723	24.7653	25.1713	18.4567	22.8491	20.5911	20.1235	18.9212	OK	20.6212	16.4593	-0.325229	-0.393841	0.4342	0.830645	no	OK	20.6212	24.3664	0.240764	0.321231	0.52335	0.884184	no	OK	16.4593	24.3664	0.565993	0.696811	0.1645	0.545066	no
XLOC_001356	Rpn3	TSS1758,TSS1759	chr2L:19051789-19053681	42.6717	47.3917	40.3064	43.9802	58.2139	54.1297	61.6971	45.4256	35.4372	45.5388	45.3172	46.8579	OK	43.2878	43.5875	0.00995395	0.0244543	0.9588	0.99405	no	OK	43.2878	54.8666	0.341968	0.850016	0.0906	0.393452	no	OK	43.5875	54.8666	0.332014	0.828834	0.0952	0.405855	no
XLOC_001357	CG10492	TSS1760	chr2L:19054077-19058821	12.1742	14.5761	15.2747	15.3793	15.2632	18.2415	18.1543	14.868	16.8605	18.1602	16.4407	17.6741	OK	17.2839	14.3511	-0.268268	-0.661496	0.18455	0.577309	no	OK	17.2839	16.6318	-0.0554857	-0.138149	0.78195	0.969423	no	OK	14.3511	16.6318	0.212782	0.526223	0.29095	0.706778	no
XLOC_001358	Phlpp	TSS1761,TSS1762	chr2L:19059128-19063132	0.777766	0.854444	0.645438	1.19162	0.535198	0.811818	0.649527	0.877675	0.393398	0.579445	0.950604	0.809471	OK	0.68323	0.867317	0.344188	0.33874	0.49385	0.867579	no	OK	0.68323	0.718555	0.072727	0.0722422	0.88825	0.98629	no	OK	0.867317	0.718555	-0.271461	-0.265837	0.6037	0.918987	no
XLOC_001359	CG10495	TSS1763	chr2L:19063294-19064726	1.1311	0.926815	2.59414	1.63869	1.8047	1.46321	2.99605	2.41681	3.34775	5.03548	2.77183	1.91945	OK	3.26863	1.57269	-1.05545	-0.981944	0.05925	0.304363	no	OK	3.26863	2.17019	-0.590861	-0.609765	0.22865	0.641444	no	OK	1.57269	2.17019	0.464591	0.415702	0.41115	0.81463	no
XLOC_001360	CG17343	TSS1764	chr2L:19064831-19069851	13.4672	2.12522	5.09067	3.9089	6.54262	3.75674	6.01381	4.8695	1.64708	4.03417	4.22115	2.96896	OK	3.21784	6.148	0.934025	0.699249	0.16275	0.542178	no	OK	3.21784	5.29567	0.71872	0.523909	0.2941	0.709364	no	OK	6.148	5.29567	-0.215305	-0.18687	0.71165	0.954793	no
XLOC_001361	CG43731	TSS1765	chr2L:19079255-19108427	1.66454	0	0	0	0.175942	0.271368	0.0548423	0.655744	0	0.384099	0.193063	0.24795	NOTEST	0.206278	0.416134	1.01246	0	1	1	no	NOTEST	0.206278	0.289474	0.488846	0	1	1	no	NOTEST	0.416134	0.289474	-0.523613	0	1	1	no
XLOC_001362	CR44905	TSS1766	chr2L:19108784-19109883	0	0	0.484447	0.169412	0	0	0.0471286	0.211416	0.0821693	0	0.249052	0	NOTEST	0.0828053	0.163465	0.981185	0	1	1	no	NOTEST	0.0828053	0.0646362	-0.357382	0	1	1	no	NOTEST	0.163465	0.0646362	-1.33857	0	1	1	no
XLOC_001363	amd	TSS1767,TSS1768	chr2L:19110153-19114110	1.05228	0	0.101388	0.132827	0.17589	0	0.0886363	0.0165847	0.19323	0.0257055	0.361998	0.112432	NOTEST	0.173341	0.321623	0.891755	0	1	1	no	NOTEST	0.173341	0.0702778	-1.30248	0	1	1	no	NOTEST	0.321623	0.0702778	-2.19423	0	1	1	no
XLOC_001364	CG10561	TSS1769	chr2L:19114400-19120306	2.40877	0.409814	2.32076	1.31636	1.50483	1.68403	2.10292	2.69031	1.10347	1.25167	2.10395	1.12214	OK	1.39531	1.61393	0.209989	0.100581	0.77145	0.967536	no	OK	1.39531	1.99552	0.516181	0.479404	0.3258	0.742703	no	OK	1.61393	1.99552	0.306192	0.150669	0.6417	0.933017	no
XLOC_001365	l(2)37Cd	TSS1770	chr2L:19127259-19129326	3.38551	3.68454	4.38948	3.30399	6.02182	4.35894	5.15168	3.38182	2.99472	2.97611	4.08102	3.77606	OK	3.45698	3.69088	0.0944528	0.123142	0.80775	0.974222	no	OK	3.45698	4.72856	0.45189	0.605213	0.2231	0.634518	no	OK	3.69088	4.72856	0.357437	0.480525	0.3331	0.749436	no
XLOC_001366	l(2)37Ce	TSS1771	chr2L:19132322-19181702	37.1717	22.0586	38.0473	33.6204	33.3533	36.1033	37.7243	27.1637	39.1657	33.7987	31.3011	37.1734	OK	35.3597	32.7245	-0.111736	-0.0584378	0.91535	0.98972	no	OK	35.3597	33.5862	-0.0742394	-0.0386605	0.9432	0.993315	no	OK	32.7245	33.5862	0.0374963	0.0193239	0.97595	0.996746	no
XLOC_001367	brat	TSS1772,TSS1773,TSS1774	chr2L:19132322-19181702	67.3062	61.3817	69.087	67.0179	60.0893	60.6964	64.7665	74.2251	54.6549	52.4363	66.6119	71.3848	OK	61.272	66.1982	0.111564	0.270677	0.5885	0.91371	no	OK	61.272	64.9443	0.0839755	0.204367	0.6774	0.944066	no	OK	66.1982	64.9443	-0.0275886	-0.0662565	0.8934	0.987025	no
XLOC_001368	pigeon	TSS1775	chr2L:19186042-19189938	3.85949	2.52945	4.07274	4.21039	6.47804	5.69359	5.99753	5.04189	3.75776	2.65314	3.54055	4.5257	OK	3.61929	3.66801	0.0192934	0.0313176	0.95055	0.993315	no	OK	3.61929	5.80276	0.681034	1.17073	0.0212	0.151437	no	OK	3.66801	5.80276	0.66174	1.14637	0.02395	0.165305	no
XLOC_001369	drl	TSS1776	chr2L:19190341-19208621	9.174	9.1471	10.0583	10.0927	16.4201	19.2156	9.69676	13.5022	10.3014	12.8929	12.4274	15.3612	OK	12.7457	9.61802	-0.406202	-0.873945	0.079	0.360526	no	OK	12.7457	14.7087	0.206655	0.462381	0.35125	0.765116	no	OK	9.61802	14.7087	0.612857	1.32614	0.00945	0.0844481	no
XLOC_001370	CR44189	TSS1777	chr2L:19217406-19218135	0	0	0	0	0	0	0	0	0	0	0	0	NOTEST	0	0	0	0	1	1	no	NOTEST	0	0	0	0	1	1	no	NOTEST	0	0	0	0	1	1	no
XLOC_001371	CR44191	TSS1778	chr2L:19262469-19263057	0	0	0	0	0	0	0	0	0	0	0	0	NOTEST	0	0	0	0	1	1	no	NOTEST	0	0	0	0	1	1	no	NOTEST	0	0	0	0	1	1	no
XLOC_001372	CG10750	TSS1779	chr2L:19300254-19301600	0	0	0	0	0	0	0	0	0	0	0	0	NOTEST	0	0	0	0	1	1	no	NOTEST	0	0	0	0	1	1	no	NOTEST	0	0	0	0	1	1	no
XLOC_001373	CR45700	TSS1780	chr2L:19322937-19326106	0	0	0.066946	0	0	0.014274	0	0.00876619	0	0	0	0	NOTEST	0	0.0167365	inf	0	1	1	no	NOTEST	0	0.00576004	inf	0	1	1	no	NOTEST	0.0167365	0.00576004	-1.53885	0	1	1	no
XLOC_001374	CR45258	TSS1781	chr2L:19327366-19327963	0	0	0	0	0	0	0	0.120534	0	0	0	0	NOTEST	0	0	0	0	1	1	no	NOTEST	0	0.0301336	inf	0	1	1	no	NOTEST	0	0.0301336	inf	0	1	1	no
XLOC_001375	CG13086	TSS1782	chr2L:19364374-19365470	59.5283	39.0066	54.8326	29.9592	51.8626	20.796	22.9323	60.5776	26.1926	18.9918	27.7754	26.9385	OK	24.9746	45.8317	0.875886	1.54054	0.0025	0.0311933	yes	OK	24.9746	39.0421	0.644573	1.1039	0.029	0.18878	no	OK	45.8317	39.0421	-0.231313	-0.435771	0.3869	0.795506	no
XLOC_001376	CG17349	TSS1783	chr2L:19370444-19372711	0	0.613142	0.244809	0.556207	1.13825	0.614482	0.678287	0.801315	0.560239	0.415263	0.849903	0.664781	OK	0.622547	0.353539	-0.816311	-0.489406	0.3391	0.756041	no	OK	0.622547	0.808084	0.376323	0.26139	0.6072	0.920675	no	OK	0.353539	0.808084	1.19263	0.717155	0.1757	0.563228	no
XLOC_001377	CG17350	TSS1784	chr2L:19380929-19383093	0	0	0.0421678	0	0.11769	0	0	0.138024	0.257349	0.257576	0	0.14576	NOTEST	0.165171	0.0105419	-3.96975	0	1	1	no	NOTEST	0.165171	0.0639286	-1.36943	0	1	1	no	NOTEST	0.0105419	0.0639286	2.60032	0	1	1	no
XLOC_001378	CG31798	TSS1785	chr2L:19390369-19398493	24.0104	33.5242	18.0615	21.7209	28.0714	23.9848	21.4928	27.4707	24.4512	28.2619	34.3067	27.1135	OK	28.5333	24.3292	-0.229956	-0.128155	0.79365	0.971105	no	OK	28.5333	25.2549	-0.176082	-0.105023	0.8301	0.977934	no	OK	24.3292	25.2549	0.0538743	0.0315895	0.9502	0.993315	no
XLOC_001379	Lectin-galC1,lectin-37Da,lectin-37Db	TSS1786,TSS1787,TSS1788	chr2L:19400752-19430270	36.3324	4.76964	24.3072	9.10917	13.1785	9.94285	10.7418	38.9571	6.02929	3.42435	10.3045	10.3043	OK	7.51562	18.6296	1.30963	0.400421	0.3488	0.763922	no	OK	7.51562	18.2051	1.27638	0.456681	0.2903	0.706216	no	OK	18.6296	18.2051	-0.0332559	-0.0126944	0.9783	0.996794	no
XLOC_001380	CG13085,CG16771	TSS1789,TSS1790,TSS1791,TSS1792	chr2L:19400752-19430270	18.8493	20.9826	14.1239	14.2605	11.9701	10.5738	9.97117	11.9112	10.2277	11.3298	11.51	11.7249	OK	11.1981	17.0541	0.606864	0.362662	0.4385	0.832914	no	OK	11.1981	11.1066	-0.0118401	-0.00845935	0.98645	0.997708	no	OK	17.0541	11.1066	-0.618704	-0.391199	0.3662	0.777462	no
XLOC_001381	CG9987	TSS1793	chr2L:19430642-19432444	20.9471	18.3114	15.3789	14.997	17.3495	17.7411	18.7429	14.5192	21.7777	22.0591	13.5416	22.3854	OK	19.941	17.4086	-0.195933	-0.410614	0.40095	0.807571	no	OK	19.941	17.0882	-0.222737	-0.46599	0.34135	0.757811	no	OK	17.4086	17.0882	-0.0268049	-0.0552512	0.90925	0.988622	no
XLOC_001382	Rab9	TSS1794	chr2L:19432573-19435841	22.9577	26.7601	13.8076	24.442	31.2258	37.618	32.7308	24.9821	27.8587	28.4539	20.367	30.2376	OK	26.7293	21.9918	-0.281453	-0.612039	0.21655	0.626029	no	OK	26.7293	31.6391	0.243289	0.55265	0.27145	0.686067	no	OK	21.9918	31.6391	0.524742	1.15878	0.02	0.144963	no
XLOC_001383	RanGAP	TSS1795,TSS1796	chr2L:19435849-19447317	8.05656	11.0497	9.19829	11.543	25.3313	22.5999	28.0167	13.2011	11.5072	14.7755	13.9761	14.7838	OK	13.7607	9.96189	-0.466057	-0.656843	0.18515	0.578264	no	OK	13.7607	22.2873	0.695671	1.07453	0.03465	0.212589	no	OK	9.96189	22.2873	1.16173	1.6767	0.00175	0.0237733	yes
XLOC_001384	CG10026	TSS1797,TSS1798,TSS1799	chr2L:19454255-19457723	0	0	0	0.0859129	0.571465	0.396645	0.430131	0.348642	0.0447336	0	0	0.183091	NOTEST	0.056956	0.0214782	-1.40697	0	1	1	no	NOTEST	0.056956	0.436721	2.93879	0	1	1	no	NOTEST	0.0214782	0.436721	4.34576	0	1	1	no
XLOC_001385	tj	TSS1800	chr2L:19464266-19467758	0	0	0	0.0126664	0.16706	0	0.0105636	0	0	0	0	0.0951874	NOTEST	0.0237969	0.0031666	-2.90976	0	1	1	no	NOTEST	0.0237969	0.0444058	0.899978	0	1	1	no	NOTEST	0.0031666	0.0444058	3.80974	0	1	1	no
XLOC_001386	CR45722	TSS1801	chr2L:19469125-19469894	0	0	0	0.138754	0	0	0	0	0	0	0	0.0982088	NOTEST	0.0245522	0.0346885	0.498605	0	1	1	no	NOTEST	0.0245522	0	#NAME?	0	1	1	no	NOTEST	0.0346885	0	#NAME?	0	1	1	no
XLOC_001387	CG13084	TSS1802	chr2L:19484929-19486532	0	0	0.0873085	0.030505	0	0	0	0.0571589	0	0.0886402	0	0	NOTEST	0.02216	0.0294534	0.410473	0	1	1	no	NOTEST	0.02216	0.0142897	-0.632981	0	1	1	no	NOTEST	0.0294534	0.0142897	-1.04345	0	1	1	no
XLOC_001388	CG13083	TSS1803	chr2L:19487489-19490104	0	0.789937	0.0817685	0.0857442	0.0570296	0.175927	0.321947	0.133824	0	0.0832226	0.0630834	0.585393	NOTEST	0.182925	0.239362	0.387948	0	1	1	no	NOTEST	0.182925	0.172182	-0.0873155	0	1	1	no	NOTEST	0.239362	0.172182	-0.475263	0	1	1	no
XLOC_001389	CG18094	TSS1804,TSS1805	chr2L:19490261-19497978	4.8524	6.59023	4.35286	5.99189	5.85762	7.43969	6.15576	6.43897	6.87898	9.64918	5.78817	7.94485	OK	7.56529	5.44684	-0.473976	-0.267463	0.60495	0.919716	no	OK	7.56529	6.47301	-0.22496	-0.135037	0.80445	0.973334	no	OK	5.44684	6.47301	0.249016	0.135511	0.81615	0.975575	no
XLOC_001390	swm	TSS1806,TSS1807	chr2L:19490261-19497978	19.7567	23.3214	25.3987	22.3685	26.1146	24.8014	27.1815	26.3581	23.9128	24.7022	25.2928	24.9603	OK	24.717	22.7113	-0.122094	-0.279084	0.5749	0.908032	no	OK	24.717	26.1139	0.0793134	0.183635	0.7142	0.955236	no	OK	22.7113	26.1139	0.201407	0.467653	0.3495	0.764096	no
XLOC_001391	Top3alpha	TSS1808	chr2L:19498167-19502268	6.40482	8.61039	9.01036	9.02354	6.65019	5.48255	8.61909	7.23054	7.3044	6.39599	9.78506	7.14884	OK	7.65857	8.26228	0.109464	0.230689	0.6417	0.933017	no	OK	7.65857	6.99559	-0.130629	-0.267869	0.5927	0.915103	no	OK	8.26228	6.99559	-0.240093	-0.497847	0.3222	0.739013	no
XLOC_001392	CG10132	TSS1809,TSS1810	chr2L:19518823-19526368	8.0081	4.21121	5.6024	3.50613	3.95936	2.20789	2.40306	5.11205	1.99468	1.44082	2.42012	2.25126	OK	2.02672	5.33196	1.39552	1.67429	0.00255	0.0316242	yes	OK	2.02672	3.42059	0.755099	0.85282	0.0978	0.412455	no	OK	5.33196	3.42059	-0.640421	-0.82727	0.10885	0.437402	no
XLOC_001393	CG10137	TSS1811	chr2L:19526685-19532985	4.00692	2.32809	2.90307	2.54581	3.19535	3.48673	2.15764	4.03361	1.96162	1.27599	2.16068	2.35288	OK	1.93779	2.94597	0.604329	0.462819	0.3495	0.764096	no	OK	1.93779	3.21833	0.731899	0.549964	0.2721	0.686377	no	OK	2.94597	3.21833	0.12757	0.11112	0.8241	0.977037	no
XLOC_001394	CG31697,CG33116	TSS1812,TSS1813	chr2L:19533478-19537363	14.3293	20.777	10.169	14.5244	13.8197	17.4465	15.8331	12.0044	12.0515	13.0746	7.34943	9.85201	OK	10.5819	14.9499	0.498541	0.979436	0.04395	0.248466	no	OK	10.5819	14.7759	0.481651	0.941841	0.04975	0.270721	no	OK	14.9499	14.7759	-0.0168908	-0.0361818	0.9442	0.993315	no
XLOC_001395	CR45455	TSS1814	chr2L:19537964-19538223	0	0	0	0.415075	0	0.956833	0.347077	0.513319	0	0	0	0	NOTEST	0	0.103769	inf	0	1	1	no	NOTEST	0	0.454307	inf	0	1	1	no	NOTEST	0.103769	0.454307	2.13029	0	1	1	no
XLOC_001396	CG13082	TSS1815	chr2L:19538424-19539740	1.44859	0.0747066	0.452917	0.547888	0.679004	0.486261	0.396157	0.13685	0.371975	0.566624	0.295724	0.550047	OK	0.446093	0.631025	0.500353	0.331337	0.4595	0.845533	no	NOTEST	0.446093	0.424568	-0.0713485	0	1	1	no	OK	0.631025	0.424568	-0.571702	-0.3713	0.3971	0.804003	no
XLOC_001397	CG13081	TSS1816	chr2L:19540606-19541540	0	0	0.370625	0.311286	0	0	0.259875	0.388152	0	0.0759739	0.519644	0.183667	NOTEST	0.194821	0.170478	-0.192568	0	1	1	no	NOTEST	0.194821	0.162007	-0.266097	0	1	1	no	NOTEST	0.170478	0.162007	-0.0735294	0	1	1	no
XLOC_001398	ref(2)P	TSS1817	chr2L:19542467-19546959	321.969	303.103	213.425	197.748	211.165	186.492	169.698	204.824	199.344	160.825	152.107	214.154	OK	181.607	259.061	0.51247	1.28174	0.0113	0.096176	no	OK	181.607	193.045	0.0881115	0.215711	0.66675	0.940766	no	OK	259.061	193.045	-0.424359	-1.07241	0.0328	0.204361	no
XLOC_001399	Tep4	TSS1818,TSS1819	chr2L:19548506-19556451	660.568	718.282	450.35	383.917	263.308	345.99	273.345	341.207	240.766	378.03	386.734	307.112	OK	328.16	553.279	0.753606	2.05731	5e-05	0.00129868	yes	OK	328.16	305.963	-0.101046	-0.280015	0.57065	0.906662	no	OK	553.279	305.963	-0.854653	-2.34469	5e-05	0.00129868	yes
XLOC_001400	Tep5	TSS1820	chr2L:19558046-19563049	0	0.0506672	0.071203	0.0248626	0.0491844	0.10116	0.0725726	0.139855	0.144656	0.048018	0.0366582	0.0759028	NOTEST	0.0763087	0.0366832	-1.05673	0	1	1	no	NOTEST	0.0763087	0.0906932	0.249146	0	1	1	no	NOTEST	0.0366832	0.0906932	1.30587	0	1	1	no
XLOC_001401	CG13078	TSS1821	chr2L:19563929-19565158	0.610734	0.346612	0.483157	0.39424	0	0.115993	0.188011	0.140569	0	0.164361	0.0827965	0.132734	OK	0.094973	0.458685	2.27192	0.932803	0.0763	0.352361	no	NOTEST	0.094973	0.111143	0.226829	0	1	1	no	OK	0.458685	0.111143	-2.04509	-0.875055	0.0848	0.37772	no
XLOC_001402	CG13077	TSS1822,TSS1823	chr2L:19565862-19567359	1.10883	0.629367	0.23373	0.0856583	0	0.31613	0.460557	0.267748	0	0	0.0450511	0.115645	OK	0.0401741	0.514397	3.67854	1.00829	0.2363	0.650548	no	NOTEST	0.0401741	0.261109	2.70031	0	1	1	no	OK	0.514397	0.261109	-0.978233	-0.500049	0.51915	0.88172	no
XLOC_001403	msb1l	TSS1824	chr2L:19577700-19580351	2.65023	1.21704	4.40828	5.04151	15.3345	11.9698	17.2623	7.17115	12.8354	4.88681	7.96333	9.50539	OK	8.79773	3.32927	-1.40193	-1.44764	0.0134	0.108685	no	OK	8.79773	12.9344	0.556014	0.846935	0.09905	0.415279	no	OK	3.32927	12.9344	1.95794	2.08246	0.00165	0.0226622	yes
XLOC_001404	CG10366	TSS1825	chr2L:19584234-19586440	5.83037	6.97537	9.50956	6.30298	7.36691	7.35693	7.25669	7.44612	7.26398	9.35942	6.78557	7.37547	OK	7.69611	7.15457	-0.105264	-0.179619	0.7136	0.955236	no	OK	7.69611	7.35667	-0.0650776	-0.111774	0.8216	0.977029	no	OK	7.15457	7.35667	0.0401869	0.068323	0.88575	0.986184	no
XLOC_001405	Lar	TSS1826,TSS1827,TSS1828,TSS1829	chr2L:19586622-19732069	12.6198	15.8076	12.1013	12.0474	9.27123	12.3512	12.5248	13.5582	9.75881	8.22466	10.2622	10.9716	OK	9.8043	13.144	0.422918	1.07128	0.03375	0.20842	no	OK	9.8043	11.9263	0.282666	0.707712	0.1572	0.532363	no	OK	13.144	11.9263	-0.140253	-0.35856	0.4742	0.854994	no
XLOC_001406	Nf-YB	TSS1830	chr2L:19736043-19737088	15.1472	4.36213	5.52645	7.17207	8.80127	5.69659	10.1582	6.47554	4.64109	4.91429	4.77826	7.07933	OK	5.35324	8.05195	0.588924	0.673063	0.18395	0.576503	no	OK	5.35324	7.7829	0.539894	0.625447	0.2095	0.61528	no	OK	8.05195	7.7829	-0.0490303	-0.0607579	0.9019	0.987986	no
XLOC_001407	CG10463	TSS1831	chr2L:19758878-19760986	2.93372	1.17447	11.2314	7.43114	8.21477	9.98056	9.47784	7.32321	11.6818	21.4999	13.0673	9.35357	OK	13.9006	5.69269	-1.28797	-2.12325	5e-05	0.00129868	yes	OK	13.9006	8.7491	-0.667945	-1.23856	0.0124	0.102698	no	OK	5.69269	8.7491	0.620023	0.979593	0.04055	0.235095	no
XLOC_001408	CG10466	TSS1832	chr2L:19792103-19795851	10.5897	6.71154	9.57859	12.417	11.9904	11.7014	10.561	11.4227	15.1425	12.9619	13.1078	8.26314	OK	12.3688	9.82422	-0.332294	-0.220814	0.66565	0.94042	no	OK	12.3688	11.4189	-0.115287	-0.0772521	0.8773	0.98534	no	OK	9.82422	11.4189	0.217007	0.144566	0.7676	0.966906	no
XLOC_001409	sick	TSS1833,TSS1834,TSS1835,TSS1836,TSS1837,TSS1838,TSS1839,TSS1840	chr2L:19796364-19958424	21.5349	20.9682	8.21237	9.84592	10.2769	10.3352	8.5781	11.9869	10.5324	8.01444	7.39406	7.55992	OK	8.37522	15.1403	0.8542	1.93181	0.0001	0.00237535	yes	OK	8.37522	10.2943	0.297644	0.690148	0.17375	0.560176	no	OK	15.1403	10.2943	-0.556556	-1.28082	0.0104	0.0903976	no
XLOC_001410	snRNA:U4:38AB	TSS1841	chr2L:19796364-19958424	0	0	0	0	0	0	0	0	0	0	0	0	NOTEST	0	0	0	0	1	1	no	NOTEST	0	0	0	0	1	1	no	NOTEST	0	0	0	0	1	1	no
XLOC_001411	snRNA:U2:38ABb	TSS1842	chr2L:19796364-19958424	0	0	0	0	0	0	0	0	0	0	0	0	NOTEST	0	0	0	0	1	1	no	NOTEST	0	0	0	0	1	1	no	NOTEST	0	0	0	0	1	1	no
XLOC_001412	snRNA:U5:38ABb	TSS1843	chr2L:19796364-19958424	0	0	0	0	0	0	0	0	0	0	0	0	NOTEST	0	0	0	0	1	1	no	NOTEST	0	0	0	0	1	1	no	NOTEST	0	0	0	0	1	1	no
XLOC_001413	CR43828	TSS1844	chr2L:19796364-19958424	0	0	0	0	0.2033	0	0	0.0274743	0	0	0	0	NOTEST	0	0	0	0	1	1	no	NOTEST	0	0.0576936	inf	0	1	1	no	NOTEST	0	0.0576936	inf	0	1	1	no
XLOC_001414	CR43827	TSS1845	chr2L:19796364-19958424	0	0	0	0	0	0	0	0	0	0	0	0	NOTEST	0	0	0	0	1	1	no	NOTEST	0	0	0	0	1	1	no	NOTEST	0	0	0	0	1	1	no
XLOC_001415	CoIV	TSS1846,TSS1847	chr2L:19958712-19960065	275.03	251.283	281.377	315.859	320.289	329.737	268.649	216.114	277.343	283.618	250.172	271.517	OK	270.663	280.887	0.0534938	0.143568	0.77765	0.968252	no	OK	270.663	283.697	0.0678572	0.181424	0.71555	0.955301	no	OK	280.887	283.697	0.0143633	0.0384537	0.939	0.992833	no
XLOC_001416	CG16772	TSS1848	chr2L:19962678-19963844	2.27882	0.198933	0.509124	1.31069	1.61695	1.9952	1.17474	1.18167	0.920012	0.80174	1.57085	1.18909	OK	1.12042	1.07439	-0.060523	-0.0419444	0.9317	0.991304	no	OK	1.12042	1.49214	0.413337	0.308941	0.5264	0.885105	no	OK	1.07439	1.49214	0.47386	0.366257	0.45145	0.840063	no
XLOC_001417	CG10680	TSS1849	chr2L:19964044-19966510	0	0	0.185991	0	0.151324	0.933635	0.538577	0.14226	0	0.184126	0	0.0459455	NOTEST	0.0575179	0.0464978	-0.306848	0	1	1	no	NOTEST	0.0575179	0.441449	2.94016	0	1	1	no	NOTEST	0.0464978	0.441449	3.24701	0	1	1	no
XLOC_001418	CR43620	TSS1850	chr2L:19968683-20017282	0	0	0	0	0	0	0	0	0	0	0.0922397	0	NOTEST	0.0230599	0	#NAME?	0	1	1	no	NOTEST	0.0230599	0	#NAME?	0	1	1	no	NOTEST	0	0	0	0	1	1	no
XLOC_001419	sNPF	TSS1851	chr2L:20027914-20056373	0	0	0.03523	0.0369123	0.39011	0.206855	1.38542	0.449775	0	0.124883	0	0.607085	NOTEST	0.182992	0.0180356	-3.34286	0	1	1	no	OK	0.182992	0.608041	1.73239	1.0077	0.04385	0.248047	no	OK	0.0180356	0.608041	5.07525	1.77654	0.25245	0.665795	no
XLOC_001420	lok	TSS1852	chr2L:20061421-20065679	11.1855	10.6633	19.5226	19.8577	15.7347	14.997	20.3917	15.6761	21.867	21.2652	23.7631	18.8814	OK	21.4442	15.3073	-0.486371	-0.96376	0.05425	0.286971	no	OK	21.4442	16.6999	-0.360749	-0.687777	0.1716	0.556	no	OK	15.3073	16.6999	0.125622	0.231545	0.64475	0.933371	no
XLOC_001421	bwa	TSS1853	chr2L:20066390-20075458	6.56604	4.87703	3.95335	4.92503	4.72855	5.1951	6.24251	5.83231	4.47733	3.91469	5.83796	5.6439	OK	4.96847	5.08036	0.0321298	0.0330852	0.94635	0.993315	no	OK	4.96847	5.49962	0.14653	0.156016	0.7597	0.964782	no	OK	5.08036	5.49962	0.1144	0.120305	0.81565	0.975542	no
XLOC_001422	neb	TSS1854	chr2L:20075756-20091348	0.751367	0.952289	1.4909	1.24203	3.04888	3.56486	4.06126	2.11366	1.71716	2.39872	3.77139	2.00416	OK	2.47286	1.10915	-1.15673	-0.651713	0.1696	0.552522	no	OK	2.47286	3.19716	0.370614	0.250818	0.60365	0.918959	no	OK	1.10915	3.19716	1.52734	0.96437	0.04155	0.239293	no
XLOC_001423	CG10721	TSS1855,TSS1856	chr2L:20091434-20093849	2.86354	6.18467	6.35819	5.34998	6.68667	6.28214	6.40127	5.51825	4.53632	5.6261	5.04231	4.93226	OK	5.03425	5.18909	0.043707	0.0469827	0.92815	0.990915	no	OK	5.03425	6.22208	0.305621	0.345893	0.48845	0.863712	no	OK	5.18909	6.22208	0.261914	0.299606	0.54445	0.894233	no
XLOC_001424	nesd	TSS1857,TSS1858	chr2L:20093971-20096253	1.47737	0.372376	2.3939	1.98406	5.21845	3.51296	5.99207	3.2343	2.81982	2.69138	2.95694	2.37987	OK	2.712	1.55693	-0.800658	-0.850321	0.0922	0.398105	no	OK	2.712	4.48945	0.727178	0.936049	0.0619	0.31182	no	OK	1.55693	4.48945	1.52784	1.7519	0.00185	0.024698	yes
XLOC_001425	Kua	TSS1859,TSS1860	chr2L:20097580-20103375	0.796058	1.33759	3.72395	1.49721	0.747868	0.743162	0.564154	1.50553	0.536141	0.380394	0.508679	0.622402	OK	0.511904	1.8387	1.84474	1.48357	0.0099	0.0872975	no	OK	0.511904	0.890179	0.798222	0.603703	0.25515	0.668114	no	OK	1.8387	0.890179	-1.04652	-0.938664	0.0794	0.361832	no
XLOC_001426	CR40341	TSS1861	chr2L:20248038-20248872	0	0	0	0	0	0	0	0	0	0	0	0	NOTEST	0	0	0	0	1	1	no	NOTEST	0	0	0	0	1	1	no	NOTEST	0	0	0	0	1	1	no
XLOC_001427	CG12617	TSS1862	chr2L:20294692-20295804	0	0	0	0	0	0	0	0	0	0	0	0	NOTEST	0	0	0	0	1	1	no	NOTEST	0	0	0	0	1	1	no	NOTEST	0	0	0	0	1	1	no
XLOC_001428	spir	TSS1863,TSS1864	chr2L:20311218-20348386	32.7526	26.599	40.1326	25.5747	42.36	56.9883	35.4174	46.615	56.166	80.485	61.7428	51.7723	OK	62.5415	31.2647	-1.00028	-2.52764	5e-05	0.00129868	yes	OK	62.5415	45.3452	-0.463865	-1.20204	0.01825	0.135575	no	OK	31.2647	45.3452	0.536413	1.34556	0.00805	0.0750538	no
XLOC_001429	RtGEF	TSS1865,TSS1866	chr2L:20350433-20365254	79.0389	90.1813	37.7145	53.7275	38.6025	47.2719	38.8594	39.2721	54.7518	44.0267	39.0248	38.7606	OK	44.141	65.1655	0.561991	1.44267	0.0039	0.0441748	yes	OK	44.141	41.0015	-0.106441	-0.27451	0.5815	0.910767	no	OK	65.1655	41.0015	-0.668432	-1.70847	0.00075	0.0122881	yes
XLOC_001430	snoRNA:Me28S-A3365	TSS1867	chr2L:20350433-20365254	0	0	0	0	0	0	0	0	0	0	0	0	NOTEST	0	0	0	0	1	1	no	NOTEST	0	0	0	0	1	1	no	NOTEST	0	0	0	0	1	1	no
XLOC_001431	Arpc2	TSS1868	chr2L:20417056-20423027	132.406	168.716	103.114	115.145	120.542	137.856	127.085	120.328	140.468	145.912	128.801	122.344	OK	134.381	129.845	-0.0495367	-0.13437	0.7859	0.969688	no	OK	134.381	126.453	-0.0877316	-0.239733	0.63155	0.929019	no	OK	129.845	126.453	-0.0381949	-0.103136	0.83785	0.979208	no
XLOC_001432	snoRNA:Psi18S-525a	TSS1869	chr2L:20417056-20423027	0	0	8.04216	0	0	30.6147	17.9334	0	0	0	0	2.3783	NOTEST	0.594574	2.01054	1.75766	0	1	1	no	OK	0.594574	12.137	4.35142	0.942825	0.35785	0.771175	no	OK	2.01054	12.137	2.59376	0.94468	0.3897	0.79771	no
XLOC_001433	snoRNA:Psi18S-640a	TSS1870	chr2L:20417056-20423027	0	0	0	4.71899	0	11.4629	7.8063	0	0	0	19.4298	7.75396	OK	6.79593	1.17975	-2.52619	-0.667361	0.4131	0.816473	no	OK	6.79593	4.8173	-0.496445	-0.175375	0.8053	0.973334	no	NOTEST	1.17975	4.8173	2.02975	0	1	1	no
XLOC_001434	snoRNA:Psi18S-525b	TSS1871	chr2L:20417056-20423027	0	0	0	0	0	0	3.45624	2.61688	0	38.8925	0	0	OK	9.72312	0	#NAME?	#NAME?	0.21575	0.624744	no	OK	9.72312	1.51828	-2.67898	-0.603859	0.433	0.830149	no	NOTEST	0	1.51828	inf	0	1	1	no
XLOC_001435	snoRNA:Psi18S-525c	TSS1872	chr2L:20417056-20423027	0	0	0	13.0213	0	0	3.59875	2.72678	0	8.2206	0	7.10298	NOTEST	3.83089	3.25532	-0.234881	0	1	1	no	NOTEST	3.83089	1.58138	-1.2765	0	1	1	no	NOTEST	3.25532	1.58138	-1.04162	0	1	1	no
XLOC_001436	snoRNA:Psi18S-640b	TSS1873	chr2L:20417056-20423027	0	41.962	0	7.70315	0	0	0	0	0	0	0	0	OK	0	12.4163	inf	#NAME?	0.16295	0.542465	no	NOTEST	0	0	0	0	1	1	no	OK	12.4163	0	#NAME?	#NAME?	0.16685	0.548747	no
XLOC_001437	snoRNA:Psi18S-525d	TSS1874	chr2L:20417056-20423027	0	0	0	0	0	0	6.37745	9.66375	0	0	0	0	NOTEST	0	0	0	0	1	1	no	OK	0	4.0103	inf	#NAME?	0.1806	0.571447	no	OK	0	4.0103	inf	#NAME?	0.17975	0.569703	no
XLOC_001438	snoRNA:Psi18S-640c	TSS1875	chr2L:20417056-20423027	0	0	0	0	0	0	0	0	0	0	0	0	NOTEST	0	0	0	0	1	1	no	NOTEST	0	0	0	0	1	1	no	NOTEST	0	0	0	0	1	1	no
XLOC_001439	snoRNA:Psi18S-525e	TSS1876	chr2L:20417056-20423027	0	0	0	0	0	0	0	6.48412	0	0	28.1934	5.66983	OK	8.46581	0	#NAME?	#NAME?	0.1739	0.560408	no	OK	8.46581	1.62103	-2.38474	-0.736113	0.4479	0.838527	no	NOTEST	0	1.62103	inf	0	1	1	no
XLOC_001440	snoRNA:Psi18S-640d	TSS1877	chr2L:20417056-20423027	0	0	0	0	0	0	0	3.10055	59.7012	0	0	10.8103	OK	17.6279	0	#NAME?	#NAME?	0.17095	0.554773	no	OK	17.6279	0.775138	-4.50726	-1.10205	0.3295	0.746018	no	NOTEST	0	0.775138	inf	0	1	1	no
XLOC_001441	snoRNA:Psi18S-525f	TSS1878	chr2L:20417056-20423027	0	0	0	0	0	0	0	0	0	0	0	0	NOTEST	0	0	0	0	1	1	no	NOTEST	0	0	0	0	1	1	no	NOTEST	0	0	0	0	1	1	no
XLOC_001442	snoRNA:Psi18S-525g	TSS1879	chr2L:20417056-20423027	0	0	0	0	0	0	0	2.72678	0	0	0	9.46532	NOTEST	2.36633	0	#NAME?	0	1	1	no	NOTEST	2.36633	0.681694	-1.79545	0	1	1	no	NOTEST	0	0.681694	inf	0	1	1	no
XLOC_001443	snoRNA:Psi18S-640e	TSS1880	chr2L:20417056-20423027	0	0	0	0	0	0	11.3041	0	0	0	0	0	NOTEST	0	0	0	0	1	1	no	NOTEST	0	2.82603	inf	0	1	1	no	NOTEST	0	2.82603	inf	0	1	1	no
XLOC_001444	snoRNA:Psi18S-525h	TSS1881	chr2L:20417056-20423027	0	0	0	4.16769	0	0	0	0	19.2652	0	0	0	NOTEST	4.8163	1.04192	-2.20868	0	1	1	no	NOTEST	4.8163	0	#NAME?	0	1	1	no	NOTEST	1.04192	0	#NAME?	0	1	1	no
XLOC_001445	snoRNA:Psi18S-640f	TSS1882	chr2L:20417056-20423027	0	0	0	0	0	0	0	0	0	0	0	0	NOTEST	0	0	0	0	1	1	no	NOTEST	0	0	0	0	1	1	no	NOTEST	0	0	0	0	1	1	no
XLOC_001446	snoRNA:Psi18S-525i	TSS1883	chr2L:20417056-20423027	0	0	0	0	0	0	6.63008	5.02681	0	0	0	6.52843	NOTEST	1.63211	0	#NAME?	0	1	1	no	NOTEST	1.63211	2.91422	0.836377	0	1	1	no	NOTEST	0	2.91422	inf	0	1	1	no
XLOC_001447	snoRNA:Psi18S-640g	TSS1884	chr2L:20417056-20423027	0	0	0	0	0	0	0	0	0	0	0	2.98164	NOTEST	0.74541	0	#NAME?	0	1	1	no	NOTEST	0.74541	0	#NAME?	0	1	1	no	NOTEST	0	0	0	0	1	1	no
XLOC_001448	snoRNA:Psi18S-525j	TSS1885	chr2L:20417056-20423027	0	0	0	0	0	0	3.322	0	0	0	11.0378	2.18592	OK	3.30592	0	#NAME?	#NAME?	0.1984	0.598651	no	OK	3.30592	0.8305	-1.993	-0.383167	0.50905	0.877585	no	NOTEST	0	0.8305	inf	0	1	1	no
XLOC_001449	CG31688	TSS1886,TSS1887	chr2L:20426198-20449964	8.05648	9.06205	9.11184	8.11823	6.32563	8.76871	8.35608	9.75202	7.45744	11.7207	12.5509	11.4206	OK	10.7874	8.58715	-0.329096	-0.658751	0.1847	0.577525	no	OK	10.7874	8.30061	-0.378058	-0.758576	0.1274	0.478929	no	OK	8.58715	8.30061	-0.0489621	-0.0956454	0.84685	0.981132	no
XLOC_001450	CG31687	TSS1888	chr2L:20450224-20459081	1.30195	1.22255	1.00088	0.703754	0.588621	0.894104	0.672424	0.940456	0.807984	0.919249	0.880917	0.727432	OK	0.833896	1.05728	0.342423	0.383169	0.4528	0.840717	no	OK	0.833896	0.773901	-0.107718	-0.117742	0.82275	0.977029	no	OK	1.05728	0.773901	-0.450141	-0.489047	0.3505	0.764916	no
XLOC_001451	Cdc23	TSS1889	chr2L:20459341-20463444	2.40116	3.0213	4.69707	3.48275	4.90738	4.38025	4.31395	3.16637	4.0651	4.51745	3.67244	3.76386	OK	4.00471	3.40057	-0.235923	-0.165621	0.7204	0.956911	no	OK	4.00471	4.19199	0.0659347	0.05728	0.9072	0.988533	no	OK	3.40057	4.19199	0.301858	0.208731	0.652	0.935261	no
XLOC_001452	CR45361	TSS1890	chr2L:20486521-20487548	0	0	0	0	0	0	0	0	0	0	0	0	NOTEST	0	0	0	0	1	1	no	NOTEST	0	0	0	0	1	1	no	NOTEST	0	0	0	0	1	1	no
XLOC_001453	CR45360	TSS1891	chr2L:20487975-20488777	0	0	0	0	0	0	0	0	0	0	0	0	NOTEST	0	0	0	0	1	1	no	NOTEST	0	0	0	0	1	1	no	NOTEST	0	0	0	0	1	1	no
XLOC_001454	CR45359	TSS1892	chr2L:20489307-20490282	0	0	0	0	0	0	0	0	0	0	0	0	NOTEST	0	0	0	0	1	1	no	NOTEST	0	0	0	0	1	1	no	NOTEST	0	0	0	0	1	1	no
XLOC_001455	CG34007	TSS1893	chr2L:20495029-20495758	0	0	0.260274	0.410705	1.3097	1.73101	2.40237	6.30209	3.18947	2.8351	2.30207	2.8581	OK	2.79619	0.167745	-4.05912	-1.7058	0.20835	0.613413	no	OK	2.79619	2.93629	0.0705346	0.0487894	0.9218	0.990156	no	OK	0.167745	2.93629	4.12966	1.75252	0.20775	0.612592	no
XLOC_001456	CR45702	TSS1894	chr2L:20513831-20514546	0	0	0	0	0	0	0	0	0	0	0	0	NOTEST	0	0	0	0	1	1	no	NOTEST	0	0	0	0	1	1	no	NOTEST	0	0	0	0	1	1	no
XLOC_001457	CG44270	TSS1895	chr2L:20531065-20531833	0	0	0	0	0	0	0	0	0	0	0	0	NOTEST	0	0	0	0	1	1	no	NOTEST	0	0	0	0	1	1	no	NOTEST	0	0	0	0	1	1	no
XLOC_001458	CR45347,mir-4973	TSS1896	chr2L:20562246-20575720	0	0	0	0	0	0	0	0	0	0	0	0	NOTEST	0	0	0	0	1	1	no	NOTEST	0	0	0	0	1	1	no	NOTEST	0	0	0	0	1	1	no
XLOC_001459	CG15475	TSS1897	chr2L:20583655-20626206	0	0	0	0	0	0	0	0	0	0	0	0	NOTEST	0	0	0	0	1	1	no	NOTEST	0	0	0	0	1	1	no	NOTEST	0	0	0	0	1	1	no
XLOC_001460	mir-133	TSS1898	chr2L:20583655-20626206	0	0	0	0	0	0	0	0	0	0	0	0	NOTEST	0	0	0	0	1	1	no	NOTEST	0	0	0	0	1	1	no	NOTEST	0	0	0	0	1	1	no
XLOC_001461	CG17472	TSS1899	chr2L:20634514-20635167	0	0	0	0	0	0	0	0	0	0	0	0.0473899	NOTEST	0.0118475	0	#NAME?	0	1	1	no	NOTEST	0.0118475	0	#NAME?	0	1	1	no	NOTEST	0	0	0	0	1	1	no
XLOC_001462	CG31680	TSS1900	chr2L:20640120-20640718	0	0	0	0.576126	0	0	0.192505	0	0	0	0	0.163724	NOTEST	0.040931	0.144031	1.81512	0	1	1	no	NOTEST	0.040931	0.0481264	0.233634	0	1	1	no	NOTEST	0.144031	0.0481264	-1.58149	0	1	1	no
XLOC_001463	Sfp38D	TSS1901	chr2L:20640916-20642216	0	0	0	0.0393167	0	0	0.0328035	0.0519969	0	0	0	0.0416121	NOTEST	0.010403	0.00982918	-0.0818612	0	1	1	no	NOTEST	0.010403	0.0212001	1.02707	0	1	1	no	NOTEST	0.00982918	0.0212001	1.10893	0	1	1	no
XLOC_001464	CG2608	TSS1902	chr2L:20645821-20647381	16.403	19.4606	15.6583	16.2533	11.5637	14.1645	15.4848	13.3344	13.0585	13.1379	12.4149	14.4173	OK	13.2572	16.9438	0.353989	0.66876	0.1749	0.562427	no	OK	13.2572	13.6369	0.040742	0.0746915	0.8789	0.98534	no	OK	16.9438	13.6369	-0.313247	-0.593363	0.232	0.645213	no
XLOC_001465	Uhg3,snoRNA:Me28S-C2645a,snoRNA:Me28S-C2645b	TSS1903,TSS1904,TSS1905	chr2L:20647532-20648847	61.9237	51.4518	68.383	55.7831	94.4596	105.435	287.429	81.4445	153.146	147.77	101.558	97.164	OK	124.909	59.3854	-1.0727	-2.18732	5e-05	0.00129868	yes	OK	124.909	142.192	0.18696	0.486778	0.4209	0.822208	no	OK	59.3854	142.192	1.25966	2.90112	5e-05	0.00129868	yes
XLOC_001466	snoRNA:Me28S-C2645c	TSS1906	chr2L:20647532-20648847	0	0	0	0	0	0	0	0	0	0	0	0	NOTEST	0	0	0	0	1	1	no	NOTEST	0	0	0	0	1	1	no	NOTEST	0	0	0	0	1	1	no
XLOC_001467	CG18810	TSS1907	chr2L:20648911-20650079	0	0.600276	0.19976	0.125679	0	0.0429657	0.069909	0.130772	0	0.0813088	0.123294	0.0394468	NOTEST	0.0610123	0.231429	1.9234	0	1	1	no	NOTEST	0.0610123	0.0609118	-0.00237997	0	1	1	no	NOTEST	0.231429	0.0609118	-1.92578	0	1	1	no
XLOC_001468	CG2611	TSS1908	chr2L:20650188-20656178	6.15036	10.6629	10.443	7.84698	7.21175	12.3268	8.93486	8.61345	11.2913	10.2052	8.10979	6.99591	OK	9.15055	8.7758	-0.0603277	-0.0310476	0.96255	0.994712	no	OK	9.15055	9.27171	0.0189764	0.0104774	0.9861	0.997617	no	OK	8.7758	9.27171	0.0793041	0.0421398	0.93965	0.992884	no
XLOC_001469	CG2614	TSS1909	chr2L:20656425-20675941	7.42581	8.38097	12.7844	9.34866	13.0298	13.7382	12.4665	11.7093	11.5385	17.1593	12.241	11.0961	OK	13.0088	9.48496	-0.455769	-0.493723	0.32745	0.744093	no	OK	13.0088	12.736	-0.0305751	-0.0363993	0.9433	0.993315	no	OK	9.48496	12.736	0.425194	0.475167	0.3418	0.757987	no
XLOC_001470	CR45004	TSS1910	chr2L:20656425-20675941	2.12788	5.83943	4.68008	5.09193	2.27974	3.15535	3.1701	4.35942	2.87646	4.72225	5.29925	4.84406	OK	4.4355	4.43483	-0.000218149	-0.000196175	0.9995	0.999605	no	OK	4.4355	3.24115	-0.452592	-0.394027	0.44575	0.83702	no	OK	4.43483	3.24115	-0.452373	-0.389321	0.4526	0.840618	no
XLOC_001471	ik2	TSS1911,TSS1912	chr2L:20676044-20681846	9.30326	12.3477	11.3794	12.6569	16.2843	12.7839	14.1214	11.6572	11.3403	13.7412	10.4083	12.1363	OK	11.9066	11.4218	-0.0599624	-0.0983378	0.8408	0.980328	no	OK	11.9066	13.7117	0.203651	0.355387	0.4868	0.862606	no	OK	11.4218	13.7117	0.263613	0.437758	0.3885	0.796553	no
XLOC_001472	CG2617	TSS1913	chr2L:20682367-20714588	4.73292	6.52091	4.06353	3.91241	6.29763	5.91261	5.70388	4.61808	4.08801	5.5044	5.23456	5.20613	OK	5.00827	4.80744	-0.0590438	-0.00756741	0.9699	0.995703	no	OK	5.00827	5.63305	0.169602	0.0507312	0.88895	0.98629	no	OK	4.80744	5.63305	0.228646	0.028194	0.8767	0.98534	no
XLOC_001473	CR44187	TSS1914	chr2L:20682367-20714588	0.203323	0	1.71562	0.11249	0.525825	0.115855	0	0.105328	0	0.273594	0.0827424	0.0795339	OK	0.108968	0.507858	2.22053	0.207079	0.3001	0.715933	no	NOTEST	0.108968	0.186752	0.777225	0	1	1	no	OK	0.507858	0.186752	-1.4433	-0.146977	0.5168	0.880655	no
XLOC_001474	CR44188	TSS1915	chr2L:20682367-20714588	1.94794	0.276324	1.20081	0.224871	0.478973	0.0923464	0	0.336931	0.0654685	0.30569	0.33088	0.0635379	OK	0.191394	0.912488	2.25326	0.27691	0.1688	0.551171	no	NOTEST	0.191394	0.227062	0.246541	0	1	1	no	OK	0.912488	0.227062	-2.00672	-0.243722	0.25945	0.672727	no
XLOC_001475	CR45306	TSS1916	chr2L:20721913-20722462	0	0	0.310273	0	0	0	0	0	0	0	0	0	NOTEST	0	0.0775682	inf	0	1	1	no	NOTEST	0	0	0	0	1	1	no	NOTEST	0.0775682	0	#NAME?	0	1	1	no
XLOC_001476	Fs(2)Ket	TSS1917,TSS1918	chr2L:20734608-20752341	14.1627	14.3912	17.3386	15.036	12.8105	13.997	19.3954	16.6624	14.5599	18.6225	17.0349	16.0747	OK	16.573	15.2321	-0.121717	-0.300609	0.54355	0.893503	no	OK	16.573	15.7163	-0.0765725	-0.186254	0.7102	0.954369	no	OK	15.2321	15.7163	0.0451445	0.109419	0.82445	0.97705	no
XLOC_001477	Ns4	TSS1919	chr2L:20752475-20757985	18.9817	23.5398	14.27	15.4931	19.5971	15.7123	16.638	14.541	12.3088	14.0136	14.625	15.459	OK	14.1016	18.0711	0.357828	0.60206	0.2303	0.643487	no	OK	14.1016	16.6221	0.237242	0.414537	0.4088	0.813309	no	OK	18.0711	16.6221	-0.120587	-0.210296	0.67135	0.942148	no
XLOC_001478	dia	TSS1920,TSS1921	chr2L:20758143-20768053	23.353	25.5725	29.2046	22.9857	19.5535	22.0152	19.2548	21.7903	22.5638	27.2389	27.263	25.8052	OK	25.7177	25.2789	-0.0248274	-0.0622194	0.89615	0.987025	no	OK	25.7177	20.6534	-0.316382	-0.796574	0.1022	0.422567	no	OK	25.2789	20.6534	-0.291555	-0.725589	0.1396	0.502423	no
XLOC_001479	cad	TSS1922,TSS1923	chr2L:20770730-20783135	11.9208	8.98879	8.94724	9.01149	19.4089	16.3532	17.0494	12.8855	9.64224	9.8529	11.5128	15.9525	OK	11.7401	9.71707	-0.272852	-0.547366	0.2719	0.686356	no	OK	11.7401	16.4243	0.484383	1.03677	0.0372	0.22271	no	OK	9.71707	16.4243	0.757234	1.58094	0.0026	0.032119	yes
XLOC_001480	Pomp	TSS1924	chr2L:20787655-20797042	71.637	58.7428	49.7322	60.9451	66.1079	72.2874	70.7414	63.1331	66.3224	69.1204	68.7964	61.0939	OK	66.3333	60.2643	-0.13843	-0.266718	0.58945	0.914165	no	OK	66.3333	68.0674	0.037232	0.0760944	0.8781	0.98534	no	OK	60.2643	68.0674	0.175662	0.336548	0.49765	0.870675	no
XLOC_001481	CR44146	TSS1925	chr2L:20787655-20797042	0	0	0.182118	0	0	0	0	0	0	0	0	0	NOTEST	0	0.0455296	inf	0	1	1	no	NOTEST	0	0	0	0	1	1	no	NOTEST	0.0455296	0	#NAME?	0	1	1	no
XLOC_001482	CG9328	TSS1926,TSS1927	chr2L:20797714-20814331	6.31416	6.66589	15.662	13.2912	16.3546	19.9063	17.7495	28.0802	25.6869	37.6346	43.4925	26.7677	OK	33.3954	10.4833	-1.67156	-3.22052	5e-05	0.00129868	yes	OK	33.3954	20.5227	-0.702432	-1.52448	0.00225	0.028828	yes	OK	10.4833	20.5227	0.969123	1.79476	0.0004	0.00737706	yes
XLOC_001483	CG9331	TSS1928,TSS1929,TSS1930,TSS1931,TSS1932	chr2L:20822827-20827744	128.841	122.53	140.004	136.326	104.783	108.262	103.749	131.481	141.924	168.504	182.108	153.843	OK	161.595	131.925	-0.29266	-0.76716	0.12875	0.481601	no	OK	161.595	112.069	-0.527997	-1.38275	0.00795	0.0743151	no	OK	131.925	112.069	-0.235337	-0.61008	0.2335	0.646871	no
XLOC_001484	CG31673	TSS1933	chr2L:20829608-20831161	45.4387	50.5573	41.5729	52.0042	36.6114	33.4325	30.3081	25.7721	39.1754	29.449	27.1981	37.6633	OK	33.3715	47.3933	0.506068	1.12428	0.02275	0.15925	no	OK	33.3715	31.531	-0.0818439	-0.173337	0.7276	0.958446	no	OK	47.3933	31.531	-0.587912	-1.30078	0.0091	0.0820117	no
XLOC_001485	CG31674	TSS1934	chr2L:20831261-20835840	24.1492	21.2484	19.8021	19.3171	19.7748	16.8236	17.6797	23.7838	15.4025	25.1297	24.9987	16.6295	OK	20.5401	21.1292	0.0407964	0.0749021	0.8799	0.98534	no	OK	20.5401	19.5155	-0.0738218	-0.1364	0.7824	0.969423	no	OK	21.1292	19.5155	-0.114618	-0.210952	0.6726	0.942248	no
XLOC_001486	CG31676	TSS1935	chr2L:20840749-20849182	5.10516	5.89011	2.6365	2.26245	1.7577	2.17855	1.33725	3.41282	3.70326	0.778268	6.58686	2.06464	OK	3.28326	3.97355	0.275302	0.284291	0.57705	0.90902	no	OK	3.28326	2.17158	-0.596383	-0.568806	0.26245	0.675757	no	OK	3.97355	2.17158	-0.871685	-0.861759	0.09045	0.393159	no
XLOC_001487	CG14402	TSS1936	chr2L:20849299-20850987	0	0	0.131806	0	0	0.0282231	0.0230474	0.138067	0	0.160487	0.122086	0.142918	NOTEST	0.106373	0.0329516	-1.69071	0	1	1	no	NOTEST	0.106373	0.0473343	-1.16817	0	1	1	no	NOTEST	0.0329516	0.0473343	0.522538	0	1	1	no
XLOC_001488	twit	TSS1937	chr2L:20852577-20857891	0	0.61127	0.122034	0.298588	0	0.0437569	0.071182	0.186407	0	0.248397	0.188296	0.140585	NOTEST	0.14432	0.257973	0.837953	0	1	1	no	NOTEST	0.14432	0.0753366	-0.937844	0	1	1	no	NOTEST	0.257973	0.0753366	-1.7758	0	1	1	no
XLOC_001489	CG9336	TSS1938,TSS1939	chr2L:20858694-20861014	9.76374	4.20021	4.66194	5.71088	0.71805	1.26922	0.749259	4.01774	2.01851	0.876717	3.89141	1.52277	OK	2.07735	6.08419	1.55032	1.28318	0.0196	0.142896	no	OK	2.07735	1.68857	-0.298942	-0.213894	0.6694	0.941581	no	OK	6.08419	1.68857	-1.84926	-1.57971	0.00365	0.0419069	yes
XLOC_001490	CG31675,CG9338	TSS1940,TSS1941	chr2L:20865214-20869650	14.571	18.1318	13.6443	15.9519	1.09626	2.40669	5.88183	6.92751	8.73664	7.22521	15.4234	9.71279	OK	10.2745	15.5748	0.600141	0.80036	0.10945	0.438704	no	OK	10.2745	4.07807	-1.33311	-1.42071	0.0105	0.0909905	no	OK	15.5748	4.07807	-1.93325	-2.15653	0.0004	0.00737706	yes
XLOC_001491	CG14401	TSS1942	chr2L:20869853-20918931	7.11022	2.6198	1.2034	3.35022	0.225592	0.282859	0.487206	0.657466	0.573651	0.662435	0.560553	0.709034	OK	0.626418	3.57091	2.51109	0.38272	0.06785	0.329444	no	OK	0.626418	0.413281	-0.600004	-0.0617097	0.5622	0.902862	no	OK	3.57091	0.413281	-3.1111	-0.387484	0.0361	0.218686	no
XLOC_001492	CR44981	TSS1943	chr2L:20869853-20918931	10.4036	9.71194	10.9049	7.52435	8.77868	8.07941	8.44119	11.4041	5.26082	6.44539	8.52231	10.4338	OK	7.66558	9.6362	0.330069	0.146425	0.8597	0.982323	no	OK	7.66558	9.17585	0.259447	0.113298	0.72575	0.958316	no	OK	9.6362	9.17585	-0.0706218	-0.0330978	0.76685	0.966874	no
XLOC_001493	Itgbetanu	TSS1944	chr2L:21053032-21071502	76.9034	97.2457	89.1036	77.9597	34.0349	44.3586	42.2606	59.4828	51.8338	75.1143	78.3289	57.5956	OK	65.7182	85.3031	0.376306	0.989942	0.0479	0.263763	no	OK	65.7182	45.0342	-0.545269	-1.39523	0.0049	0.0524309	no	OK	85.3031	45.0342	-0.921576	-2.38484	5e-05	0.00129868	yes
XLOC_001494	tadr	TSS1945	chr2L:21075404-21081053	12.1626	8.89697	4.26106	6.03695	4.71161	3.94394	3.6529	6.00224	5.97725	4.24888	4.11271	5.27562	OK	4.90361	7.83941	0.676899	1.17195	0.0187	0.138022	no	OK	4.90361	4.57767	-0.0992311	-0.160594	0.7362	0.960305	no	OK	7.83941	4.57767	-0.77613	-1.32609	0.00625	0.062858	no
XLOC_001495	CG9259	TSS1946,TSS1947	chr2L:21089374-21090999	1.40342	0.723752	0.168795	0.283134	0.300134	0.21739	0.354324	0.419922	0.360423	0.99494	0.468926	0.166535	OK	0.497706	0.644775	0.373502	0.247361	0.56815	0.905007	no	OK	0.497706	0.322942	-0.624018	-0.331202	0.44655	0.837563	no	OK	0.644775	0.322942	-0.99752	-0.537101	0.23575	0.650134	no
XLOC_001496	CG14397	TSS1948	chr2L:21091226-21094864	0.41285	0	0	0	0	0.118649	0.284095	0	0	0	0	0.0536868	NOTEST	0.0134217	0.103212	2.94298	0	1	1	no	NOTEST	0.0134217	0.100686	2.90722	0	1	1	no	NOTEST	0.103212	0.100686	-0.0357532	0	1	1	no
XLOC_001497	CG34136	TSS1949	chr2L:21094965-21102429	0	0.637112	0.663471	0.464364	2.18337	0.801739	0.452283	1.35109	0	2.49331	1.81788	1.57135	OK	1.47064	0.441237	-1.73682	-0.398665	0.4464	0.837563	no	OK	1.47064	1.19712	-0.296871	-0.0859694	0.89465	0.987025	no	OK	0.441237	1.19712	1.43994	0.326839	0.4805	0.858511	no
XLOC_001498	CG9257	TSS1950	chr2L:21102585-21104321	2.35783	11.3678	7.5505	6.72399	8.63524	7.69382	8.16567	7.7864	8.61318	10.9493	6.5287	8.35417	OK	8.61133	7.00002	-0.298877	-0.457807	0.36195	0.774288	no	OK	8.61133	8.07028	-0.0936169	-0.150981	0.7574	0.964262	no	OK	7.00002	8.07028	0.20526	0.313794	0.5261	0.885105	no
XLOC_001499	Nhe2	TSS1951,TSS1952,TSS1953	chr2L:21104567-21134255	8.5442	9.41094	7.40665	8.99879	8.26376	8.83778	10.1503	7.96314	7.81653	6.29381	8.08278	9.49274	OK	7.92146	8.59014	0.116915	0.260374	0.6064	0.920188	no	OK	7.92146	8.80375	0.152351	0.331567	0.5176	0.880819	no	OK	8.59014	8.80375	0.0354361	0.0782357	0.87865	0.98534	no
XLOC_001500	CG9253	TSS1954	chr2L:21143228-21148546	54.8109	52.004	109.362	95.9603	92.3134	107.009	96.7124	108.139	131.539	185.677	143.009	133.921	OK	148.537	78.0342	-0.92864	-2.07745	5e-05	0.00129868	yes	OK	148.537	101.043	-0.555843	-1.30597	0.0086	0.078922	no	OK	78.0342	101.043	0.372796	0.820394	0.1038	0.425837	no
XLOC_001501	snoRNA:Me18S-A469	TSS1955	chr2L:21143228-21148546	0	0	0	0	0	0	0	0	0	0	0	0	NOTEST	0	0	0	0	1	1	no	NOTEST	0	0	0	0	1	1	no	NOTEST	0	0	0	0	1	1	no
XLOC_001502	Mpp6	TSS1956,TSS1957	chr2L:21154292-21158611	1.76831	0.836767	3.56043	3.65614	4.69221	7.66983	6.58668	4.1531	5.68343	9.68562	6.4414	5.37304	OK	6.79587	2.45541	-1.46869	-0.831225	0.2037	0.606523	no	OK	6.79587	5.77546	-0.234723	-0.151409	0.77165	0.967536	no	OK	2.45541	5.77546	1.23397	0.650897	0.29355	0.708993	no
XLOC_001503	CG9248	TSS1958	chr2L:21158846-21163083	53.166	48.6259	38.8129	42.3275	33.564	29.2514	34.3092	34.3872	35.6674	39.7984	32.1689	42.1162	OK	37.4377	45.7331	0.288744	0.61275	0.2244	0.636004	no	OK	37.4377	32.8779	-0.187374	-0.384758	0.43935	0.833297	no	OK	45.7331	32.8779	-0.476118	-1.00233	0.04455	0.251114	no
[truncated: 14,400 more rows]

## Sheet: Rad21 RNAi
	gene_short_name	log2(fold_change)	p_value	significant	status_Control%Rad21RNAi
[truncated: 15,903 more rows]

## Sheet: Rad21-HA
	gene_short_name	log2(fold_change)	p_value	significant	status_Control%Rad21HA
[truncated: 15,903 more rows]

[truncated: 6 more sheets: RNAI sign, HA sign, RNAi vs HA, RNAi log2 Esg RNAi, RNAi log2 EC, Esg RNAi and EC genes]
