# Supplementary material for: Cohesin controls intestinal stem cell identity by maintaining association of Escargot with target promoters
Source: eLife. 2020 Feb 5;9:e48160. doi: 10.7554/eLife.48160 (PMC7002041; doi:10.7554/eLife.48160)
Supplement: Figure 6—source data 2. — Methylated DNA enrichment was measured relative to samples from dam-expressing ISCs (two independent samples for each condition; see Materials and methods for details). Peaks that pass IDR (irreproducible discovery rate) test in esg-dam (control) and esg-dam (Rad21-) samples were called and are shown in separate worksheets (‘idr_esg-dam (Rad21-) Peaks’ and ‘idr_esg-dam (Control) Peaks’). Merged peaks with chromosomal location are shown in the worksheet labeled ‘merged_esg-dam (ctrl and Rad21-)’, and peaks enriched in Control and Rad21 RNAi conditions are shown with gene annotations in the other two worksheets. [file elife-48160-fig6-data2.xlsx]

## Sheet: enriched in esg-dam (Control)
chrom	start	end	FBID	symbol	strand	score	focus ratio/other	Total Tags	Background Tags	Fold Change vs. Background	p-value
chr2R	14486066	14487065	FBgn0267824	CG46146	+	0	0	18920.1	15727	6.83	0
chr2R	22681485	22682484	NA	NA	+	0	0	8751.5	7266	6.44	0
chr2L	2175226	2176225	FBgn0000097	CG3166	+	0	0	10547.2	8750	4.82	0
chr2R	10854703	10855702	FBgn0050015	CG30015	+	0	0	10498.3	8696	4.69	0
chr3R	16008616	16009615	FBgn0038391	CG10278	+	0	0	40743.8	33743	4.32	0
chr3R	16238667	16239666	FBgn0040071	CG6889	+	0	0	6210.4	5136	4.26	0
chr3R	26012128	26013127	FBgn0266400	CR45040	+	0	0	4672.2	3854	4.07	0
chrX	521461	522460	FBgn0023535	CG18104	+	0	0	19095.2	15746	4.05	0
chr2L	552112	553111	FBgn0005660	CG2914	+	0	0	4258	3497	3.99	0
chr2R	10164055	10165054	FBgn0033494	CG33135	+	0	0	18510.2	15153	3.87	0
chr3L	18002876	18003875	FBgn0086081	CR34710	+	0	0	7189.2	5889	3.86	0
chr3R	10268507	10269684	FBgn0262617	CG43143	+	0	0	26524.3	21680	3.86	0
chr3R	14810722	14811721	FBgn0266756	CG44012	+	0	0	5850.9	4778	3.69	0
chr3R	5087195	5088194	FBgn0010313	CG2530	+	0	0	16724	13544	3.68	0
chr3R	22624094	22625093	FBgn0263451	CR43474	+	0	0	6727.5	5449	3.65	0
chr3R	26978117	26979116	FBgn0039467	CG14253	+	0	0	6939.8	5635	3.65	0
chr3R	28571264	28572263	NA	NA	+	0	0	9492.5	7735	3.64	0
chrX	9577854	9578853	FBgn0259741	CG42395	+	0	0	6822.4	5547	3.58	0
chrX	19669307	19670306	FBgn0004057	CG12529	+	0	0	6032.5	4895	3.57	0
chr2L	245234	246233	FBgn0265149	CR44218	+	0	0	33734	27127	3.55	0
chr2R	7782500	7783499	FBgn0263558	CR43543	+	0	0	10714.2	8656	3.51	0
chr2R	23845206	23846205	FBgn0267590	CR45928	+	0	0	8278.9	6653	3.49	0
chr3L	3197794	3198793	FBgn0035415	CG14966	+	0	0	28613.9	23079	3.46	0
chr3L	13476991	13477990	FBgn0086708	CG32130	+	0	0	8160	6578	3.44	0
chr2R	6132718	6133834	FBgn0033063	CG14589	+	0	0	21871.8	17470	3.43	0
chr2R	11679474	11680473	FBgn0044020	CG8998	+	0	0	12272.8	9846	3.36	0
chr3R	5041601	5042600	NA	NA	+	0	0	17439.5	13950	3.32	0
chr3R	31718728	31719727	FBgn0003870	CG1856	+	0	0	9490.3	7601	3.3	0
chrX	2069871	2070870	FBgn0025628	CG4199	+	0	0	12597.4	10063	3.28	0
chrX	7230904	7231903	FBgn0029939	CG9650	+	0	0	13597.3	10844	3.27	0
chrX	10839174	10840971	FBgn0003321	CG1664	+	0	0	23267.8	18564	3.24	0
chr2R	8610493	8611492	FBgn0267792	CG8643	+	0	0	9123.5	7219	3.23	0
chr3L	546898	548487	FBgn0267458	CR45808	+	0	0	23564.6	18746	3.18	0
chr3L	9509681	9510680	FBgn0036008	CG3408	+	0	0	33267.2	26384	3.18	0
chr3L	17662808	17663807	FBgn0036746	CG6064	+	0	0	9705.5	7674	3.14	0
chr3L	19870044	19871043	FBgn0262518	CG8287	+	0	0	10234.3	8115	3.12	0
chr2R	16211052	16212051	FBgn0034091	CG8448	+	0	0	21017.7	16490	3.11	0
chr2R	23668508	23669507	FBgn0266377	CG45019	+	0	0	7717.3	6077	3.1	0
chrX	2506405	2507404	FBgn0284408	CG33950	+	0	0	10620.8	8383	3.05	0
chr3L	3208465	3209629	FBgn0035416	NA	+	0	0	8336.5	6509	3.05	0
chr3L	3238397	3239396	FBgn0035425	CG17746	+	0	0	6868.3	5381	3.01	0
chr3L	8699077	8700195	NA	NA	+	0	0	12917.6	10095	3.01	0
chr3L	9502039	9503855	FBgn0036007	CG3424	+	0	0	17048.6	13319	2.97	0
chr3L	9671049	9672048	FBgn0016081	CG32045	+	0	0	6766.9	5284	2.97	0
chrX	769158	770157	FBgn0027343	CG16785	+	0	0	3378.4	2641	2.96	0
chr2L	13056334	13057333	FBgn0262160	CG9932	+	0	0	26820.5	20785	2.96	0
chr2R	6142373	6143372	FBgn0011958	CR30304	+	0	0	12153.9	9422	2.92	0
chr2R	22397868	22398867	FBgn0034724	CG3624	+	0	0	4873.5	3771	2.89	0
chr3L	639834	640833	FBgn0263342	CR43423	+	0	0	10998.6	8507	2.89	0
chr3L	13259255	13260254	FBgn0023095	CG11282	+	0	0	7545.9	5861	2.88	0
chr3L	17009757	17010756	FBgn0036684	CG3764	+	0	0	24233.5	18728	2.87	0
chr3L	21962523	21963528	FBgn0029091	CG7464	+	0	0	10075.3	7835	2.87	0
chr3L	22004861	22005860	NA	NA	+	0	0	9902.4	7673	2.87	0
chr3R	11811751	11813285	FBgn0051116	CG31116	+	0	0	39299.7	30465	2.85	0
chr2L	7522746	7523745	FBgn0264895	CG44086	+	0	0	12606.1	9665	2.85	0
chr2L	8701700	8702699	FBgn0004914	CG9310	+	0	0	14167.7	10903	2.85	0
chr2R	6145108	6146107	FBgn0011891	CR32837	+	0	0	9255.5	7101	2.85	0
chr2R	12926083	12927388	FBgn0033782	CG3850	+	0	0	19148.4	14680	2.84	0
chr2R	24882273	24883272	FBgn0085442	CG34413	+	0	0	9032.3	6925	2.83	0
chr3L	13488516	13489515	FBgn0036373	CG10741	+	0	0	16133.3	12440	2.82	0
chr3L	14363274	14364273	FBgn0001085	CG17697	+	0	0	21650.8	16658	2.81	0
chr3R	26020728	26021727	FBgn0002592	CG6104	+	0	0	9727.4	7485	2.81	0
chrX	14119324	14120323	FBgn0011983	CR32609	+	0	0	11366.2	8736	2.79	0
chrX	14949865	14950864	FBgn0000535	CG10952	+	0	0	4118.7	3167	2.77	0
chr2R	18610872	18611871	FBgn0034360	CG10927	+	0	0	13403.3	10244	2.75	0
chr3L	19631735	19632734	FBgn0036896	CG8789	+	0	0	8635.5	6592	2.75	0
chrX	19000823	19001822	FBgn0264090	CG43759	+	0	0	6454.8	4934	2.74	0
chr2L	5997721	5998720	FBgn0031760	CG9093	+	0	0	11030	8368	2.73	0
chr2R	6548062	6549061	FBgn0086655	CG9397	+	0	0	7847.1	5964	2.72	0
chr3L	16153488	16154487	FBgn0036576	CG5151	+	0	0	21677.1	16395	2.72	0
chr3L	17622973	17623972	FBgn0036740	CG6259	+	0	0	11336.3	8582	2.72	0
chr3L	21934397	21935396	FBgn0037140	CG7442	+	0	0	2360.9	1789	2.72	0
chr3R	21948717	21949716	FBgn0264490	CG18389	+	0	0	21189.1	16071	2.72	0
chrX	1268842	1269841	FBgn0028550	CG11405	+	0	0	10966.5	8289	2.72	0
chrX	2457229	2458685	FBgn0040388	CG32796	+	0	0	11822.1	8942	2.71	0
chrX	5886249	5887248	FBgn0267228	CR45668	+	0	0	12395.3	9356	2.7	0
chr2R	22998961	22999960	FBgn0003900	CG2956	+	0	0	5122.2	3856	2.7	0
chr3L	9421062	9422166	FBgn0035989	CG3967	+	0	0	11301.3	8511	2.7	0
chr3R	15115513	15116512	FBgn0261859	CG42788	+	0	0	14357.3	10803	2.69	0
chrX	7938045	7939044	FBgn0029980	CG10778	+	0	0	10854.9	8137	2.69	0
chrX	12576982	12577981	FBgn0030400	CG11138	+	0	0	8193.5	6161	2.69	0
chr2L	16521924	16523491	FBgn0032587	CG5953	+	0	0	21381.7	15992	2.68	0
chr2R	20128035	20129034	NA	NA	+	0	0	13217.3	9845	2.68	0
chr3L	16748319	16749318	NA	NA	+	0	0	7490.4	5591	2.68	0
chr4	504001	505000	FBgn0004607	CG1449	+	0	0	22307.2	16630	2.67	0
chrX	2193384	2194853	FBgn0023549	CG3456	+	0	0	20412.4	15200	2.67	0
chrX	10773306	10774305	FBgn0052672	CG32672	+	0	0	16968.4	12704	2.67	0
chrX	21039273	21040272	FBgn0025814	CG1742	+	0	0	10614.3	7899	2.66	0
chr3L	753253	754252	FBgn0035160	CG13897	+	0	0	8263.6	6118	2.65	0
chr3L	8545802	8546801	FBgn0260442	CG6831	+	0	0	14877.3	11020	2.65	0
chr3R	29784118	29785117	FBgn0001297	CG33956	+	0	0	1910.2	1419	2.65	0
chrX	1465894	1466893	FBgn0029580	CG14778	+	0	0	17596.3	13025	2.64	0
chrX	18783665	18784664	FBgn0030956	CG18259	+	0	0	12145.9	9004	2.64	0
chr2L	6065932	6066931	FBgn0266449	CG9159	+	0	0	10109.5	7459	2.64	0
chr2R	15130760	15131759	FBgn0015371	CG11798	+	0	0	5451.9	4000	2.64	0
chr2R	22300969	22301968	FBgn0034718	CG3413	+	0	0	4505.9	3311	2.64	0
chr3R	16009917	16010916	FBgn0038391	CG10278	+	0	0	16455.6	12068	2.63	0
chr3R	19321964	19322963	FBgn0000463	CG3619	+	0	0	11929.3	8747	2.62	0
chrX	15078623	15079622	FBgn0053178	CG33178	+	0	0	5242.6	3867	2.62	0
chr2L	3107774	3108773	FBgn0005779	CG8822	+	0	0	4534.4	3302	2.62	0
chr2L	3305690	3306689	FBgn0031518	CG3277	+	0	0	12662.3	9244	2.61	0
chr2R	8195542	8196692	FBgn0053087	CG33087	+	0	0	12992.7	9456	2.6	0
chr2R	23383549	23384548	FBgn0266011	CR44784	+	0	0	21033.8	15386	2.6	0
chr3R	5736359	5737358	FBgn0037369	CG2100	+	0	0	11312.3	8250	2.6	0
chrX	18972640	18973639	FBgn0264090	CG43759	+	0	0	12170.7	8893	2.59	0
chr2L	4888060	4889059	FBgn0031644	CG15625	+	0	0	5475.2	3979	2.59	0
chr2R	7407184	7408183	FBgn0033166	CG11166	+	0	0	7623.2	5507	2.58	0
chr2R	17100050	17101049	FBgn0010226	CG8938	+	0	0	12404.1	8971	2.57	0
chr2R	21548876	21549875	FBgn0003731	CG10079	+	0	0	13478.4	9744	2.57	0
chr3L	1740413	1741412	FBgn0035266	CG7995	+	0	0	15885.3	11543	2.56	0
chr3R	9987307	9988306	FBgn0267336	CG34360	+	0	0	9242.3	6715	2.56	0
chr2L	866358	867516	FBgn0086031	CR34660	+	0	0	24909.6	17925	2.55	0
chr2R	6537065	6538064	FBgn0264506	CR43905	+	0	0	9171.6	6579	2.55	0
chr2R	10735401	10736400	FBgn0033544	CG7220	+	0	0	10791.5	7748	2.55	0
chr3L	14364391	14365390	FBgn0001085	CG17697	+	0	0	18322.8	13170	2.54	0
chr3R	7089285	7090284	FBgn0040670	CG14612	+	0	0	39525.8	28487	2.54	0
chr3R	12643254	12644253	FBgn0038070	CG6753	+	0	0	12377.1	8930	2.54	0
chr3R	16229728	16230727	FBgn0040071	CG6889	+	0	0	10095.7	7240	2.54	0
chrX	15453079	15454078	FBgn0040285	CG9195	+	0	0	5099.6	3673	2.53	0
chrX	18776953	18777952	FBgn0030955	CG6891	+	0	0	14675.3	10547	2.53	0
chr2R	7457764	7458763	FBgn0025885	CG11143	+	0	0	11218.2	8010	2.52	0
chr3L	16969927	16970926	FBgn0261547	CG42665	+	0	0	4304.6	3073	2.51	0
chrX	10583929	10584928	FBgn0085443	CG34414	+	0	0	5498.6	3930	2.51	0
chr2L	12720232	12721258	FBgn0032455	CG5792	+	0	0	18418.3	13053	2.51	0
chr2L	13373386	13374385	FBgn0032511	CG9306	+	0	0	17430.1	12350	2.51	0
chr2R	21708513	21709512	FBgn0265962	CR44749	+	0	0	15384.2	10914	2.51	0
chr3L	13484714	13486238	FBgn0036373	CG10741	+	0	0	29694.1	21044	2.5	0
chr3R	31721719	31722718	FBgn0003870	CG1856	+	0	0	6858.1	4847	2.5	0
chrX	15787576	15788575	FBgn0026374	CG8497	+	0	0	9899.5	7012	2.5	0
chrX	18510393	18511392	FBgn0010194	CG6407	+	0	0	7812.8	5544	2.5	0
chr2L	6561032	6562031	FBgn0031829	CG9595	+	0	0	8817.9	6190	2.5	0
chr2R	13448673	13449672	FBgn0013765	CG4832	+	0	0	13663	9624	2.5	0
chr2R	17800953	17801952	FBgn0266808	CR45270	+	0	0	4526.4	3187	2.5	0
chr3L	1098264	1099269	FBgn0004870	CG9097	+	0	0	5486.9	3877	2.48	0
chr3L	8682811	8683810	NA	NA	+	0	0	25486.5	17977	2.48	0
chr3R	31322981	31323980	FBgn0085376	CG34347	+	0	0	5090.1	3593	2.47	0
chrX	19244008	19245007	FBgn0031005	CG7890	+	0	0	4735	3333	2.46	0
chr2L	4328662	4329661	FBgn0028482	CG16857	+	0	0	9310.2	6505	2.46	0
chr2L	6822707	6823706	FBgn0051632	CG31632	+	0	0	7164.4	5005	2.46	0
chr2R	24131391	24132390	FBgn0264299	CG43777	+	0	0	20120.6	14025	2.45	0
chr3L	15974768	15975767	FBgn0000212	CG5942	+	0	0	8026.5	5594	2.45	0
chr3R	19879616	19880615	FBgn0014006	CG4720	+	0	0	16668.6	11665	2.45	0
chr3R	29774149	29775148	FBgn0001297	CG33956	+	0	0	16200.4	11367	2.45	0
chr3R	30802276	30803275	FBgn0039802	CG1349	+	0	0	11450.8	7983	2.45	0
chr2L	8534372	8535845	FBgn0028394	CG17834	+	0	0	46511.5	32236	2.45	0
chr2L	19157406	19158405	FBgn0010300	CG10719	+	0	0	14590	10141	2.44	0
chr2L	19432832	19433831	FBgn0032782	CG9994	+	0	0	24905.2	17350	2.44	0
chr3L	12078714	12079804	FBgn0284221	CG5661	+	0	0	11709.7	8121	2.44	0
chr2L	4475961	4476960	FBgn0011603	CG15444	+	0	0	7799.7	5381	2.44	0
chr2L	5877864	5878863	FBgn0031745	CG8965	+	0	0	5600.7	3872	2.44	0
chr2R	6787964	6788963	FBgn0085421	CG34392	+	0	0	18034.7	12441	2.44	0
chr2R	22542707	22543706	FBgn0003175	CG4444	+	0	0	13806.6	9540	2.44	0
chr3L	9713873	9714872	FBgn0045823	CG16707	+	0	0	10831.6	7468	2.44	0
chrX	1614769	1615768	FBgn0283451	CG11491	+	0	0	14012.3	9672	2.44	0
chr2R	6531277	6532276	FBgn0086655	CG9397	+	0	0	21792.3	14897	2.44	0
chr2R	14927346	14928345	FBgn0027596	CG10249	+	0	0	9278.8	6352	2.43	0
chr3R	4649546	4650545	FBgn0265038	CR44155	+	0	0	26303.4	17984	2.43	0
chr3R	7121330	7122329	FBgn0261238	CG1070	+	0	0	6741.4	4603	2.43	0
chr3R	16933674	16934673	FBgn0000015	CG11648	+	0	0	18541.6	12671	2.43	0
chr3R	17706640	17707639	FBgn0261885	CG7467	+	0	0	8855.1	6075	2.43	0
chr2R	10601887	10602950	FBgn0263102	CG2368	+	0	0	16456.4	11178	2.42	0
chr3R	8112741	8113740	FBgn0243512	CG7850	+	0	0	13390.9	9106	2.42	0
chr2L	2887847	2888846	FBgn0041111	CG8817	+	0	0	21631.9	14611	2.42	0
chr3L	8057633	8058743	FBgn0026263	CG7574	+	0	0	25137.8	16990	2.42	1.73e-314
chrX	13625424	13626423	FBgn0030504	CG2691	+	0	0	17484.8	11788	2.41	0
chrX	15543121	15544120	FBgn0022710	CG9210	+	0	0	6179.1	4189	2.41	0
chrX	15624877	15625876	FBgn0003463	CG9224	+	0	0	12827.1	8681	2.41	0
chrX	18654000	18654999	FBgn0030944	CG6617	+	0	0	3990.3	2703	2.41	0
chr2R	7060585	7061584	FBgn0033139	CG12837	+	0	0	8177.5	5493	2.4	0
chr3L	16988627	16989626	FBgn0261547	CG42665	+	0	0	6667.7	4469	2.4	0
chr3R	29776443	29777442	FBgn0001297	CG33956	+	0	0	7715.1	5175	2.4	0
chrX	9645384	9646647	FBgn0028341	CG32697	+	0	0	25212.2	16968	2.4	0
chrX	13405429	13406547	FBgn0030484	CG1681	+	0	0	18715.9	12589	2.4	0
chr2L	128114	129290	FBgn0025683	CG3164	+	0	0	16838.6	11218	2.39	0
chr2L	15484046	15485045	FBgn0020371	CG15257	+	0	0	5754.6	3849	2.39	0
chr2R	7254585	7255584	FBgn0266818	CR45280	+	0	0	20280.4	13486	2.38	0
chr2R	10124871	10125894	FBgn0284235	CG46319	+	0	0	13519.3	9019	2.38	0
chr2R	17710393	17711868	FBgn0028494	CG6424	+	0	0	46617.3	31173	2.38	0
chr3L	71910	72909	FBgn0264720	CR43988	+	0	0	18280.5	12156	2.38	0
chr3L	14207084	14208083	FBgn0013718	CG33991	+	0	0	12828.6	8547	2.37	0
chr3R	5229415	5230414	FBgn0037301	CG12005	+	0	0	6505.8	4334	2.37	0
chr3R	9627773	9628772	FBgn0037721	CG9427	+	0	0	14538.9	9706	2.37	0
chr3R	25051126	25052125	FBgn0039266	CG11791	+	0	0	8115.5	5397	2.37	0
chr2R	24553726	24554725	FBgn0035021	CG4622	+	0	0	14726.3	9755	2.37	2.04e-288
chr3L	648797	650633	FBgn0035147	CG12030	+	0	0	18808.5	12435	2.36	0
chr3L	4103582	4104581	FBgn0028484	CG14992	+	0	0	10453.1	6919	2.36	0
chrX	3373474	3374473	FBgn0266350	CR44999	+	0	0	16064	10654	2.36	0
chrX	7308497	7309496	FBgn0029941	CG1677	+	0	0	6541.6	4323	2.36	0
chrX	13640830	13641855	FBgn0030505	CG11172	+	0	0	23730.9	15730	2.35	0
chr2R	13895947	13896946	FBgn0013733	CG18076	+	0	0	16328	10715	2.35	0
chr3L	4410920	4411919	FBgn0035542	CG11347	+	0	0	5508.1	3626	2.35	0
chr3L	5352348	5353347	FBgn0052420	CR32420	+	0	0	7238.1	4773	2.35	0
chrX	1248209	1249208	FBgn0028550	CG11405	+	0	0	17183.5	11300	2.35	0
chrX	5047078	5048077	FBgn0003028	CG6824	+	0	0	5125.2	3376	2.34	0
chrX	7965424	7966423	FBgn0003656	CG2212	+	0	0	24960.6	16383	2.34	0
chrX	10478353	10479352	FBgn0261710	CG17255	+	0	0	17387	11455	2.33	0
chrX	10739342	10741248	FBgn0265987	CR44766	+	0	0	30726.9	20281	2.32	0
chr2R	6121075	6122074	FBgn0000546	CG1765	+	0	0	21825.9	14283	2.32	0
chr2R	7491273	7492272	FBgn0263240	CG1621	+	0	0	18641.5	12170	2.32	0
chr3R	20556129	20557128	FBgn0067782	CG33488	+	0	0	15198.2	9941	2.32	0
chr3R	26228896	26229895	FBgn0265379	CR44320	+	0	0	14816.8	9667	2.32	0
chrX	11135914	11136913	FBgn0030269	CG18292	+	0	0	5728.3	3740	2.32	0
chr3L	22870952	22871951	FBgn0267631	CR45969	+	0	0	17470.2	11361	2.32	0
chr3R	6405019	6406018	FBgn0037443	CG1021	+	0	0	10022	6491	2.32	0
chr3R	14738116	14739115	FBgn0011217	CG7425	+	0	0	20360.6	13199	2.32	0
chr2L	857694	858821	FBgn0262177	CR42884	+	0	0	5590.5	3601	2.32	0
chr2L	18146729	18147728	FBgn0041184	CG15154	+	0	0	16729.9	10814	2.31	0
chr2R	16196973	16197972	FBgn0262026	CG42837	+	0	0	10299.2	6658	2.31	0
chr3L	11213643	11214642	FBgn0261553	CG42671	+	0	0	4244.8	2739	2.31	0
chr3R	12699962	12701351	FBgn0038080	CG12279	+	0	0	42947.9	27701	2.31	0
chr2R	6992373	6993372	FBgn0050159	CG30159	+	0	0	13371.2	8572	2.31	0
chr2R	11266082	11267081	FBgn0033602	CG13222	+	0	0	12938.7	8281	2.31	0
chr3L	1030719	1031718	FBgn0035181	CG9205	+	0	0	13789.1	8867	2.3	0
chr3L	6977342	6978341	FBgn0001104	CG10060	+	0	0	16355	10503	2.3	0
chr3R	14298398	14299397	FBgn0285913	CG12207	+	0	0	18313.3	11736	2.3	0
chr3R	27605274	27606273	FBgn0039530	CG5586	+	0	0	25619.2	16444	2.3	0
chr3R	31672558	31673557	FBgn0039863	CG1815	+	0	0	26293.9	16808	2.3	0
chrX	1384775	1385804	FBgn0024986	CG3719	+	0	0	42966.9	27619	2.3	0
chrX	16643231	16644230	FBgn0261791	CG9742	+	0	0	20850.7	13403	2.3	0
chr2R	10538123	10539122	FBgn0263483	CR43598	+	0	0	6960.9	4430	2.3	0
chr2R	15558071	15559070	FBgn0034031	CG12963	+	0	0	6538.6	4172	2.29	0
chr2R	23978763	23979762	FBgn0034948	CG3825	+	0	0	19545.2	12417	2.29	0
chrX	17880916	17881915	FBgn0030881	CG12985	+	0	0	28900.6	18366	2.29	0
chr2R	9928187	9929186	FBgn0011656	CG1429	+	0	0	32963.8	20802	2.29	0
chr3L	4542160	4543159	FBgn0035558	CG11357	+	0	0	40972.1	25931	2.29	0
chr3R	21203655	21205488	FBgn0264357	CG17299	+	0	0	39803.7	25149	2.29	0
chr2L	10662502	10663501	FBgn0051871	CG31871	+	0	0	8114.8	5119	2.28	0
chr2R	16128066	16129065	FBgn0086676	CG8428	+	0	0	17532.9	11034	2.28	0
chr2R	18531925	18532924	FBgn0034356	CG10924	+	0	0	6364.3	4009	2.28	0
chr3R	9572249	9573248	FBgn0037714	CG9396	+	0	0	12752.7	8039	2.28	0
chrX	10220447	10221446	FBgn0040941	CG15308	+	0	0	7296.4	4581	2.27	0
chrX	19187772	19188771	FBgn0030993	CG7635	+	0	0	8237.3	5192	2.27	0
chr2L	483320	484319	FBgn0043364	CG4427	+	0	0	64261.7	40280	2.27	0
chr2L	1885500	1886499	FBgn0031374	CG7337	+	0	0	4463.6	2785	2.27	0
chr2R	7450784	7451783	FBgn0050502	CG30502	+	0	0	5672.9	3540	2.27	2.35e-209
chr2R	24685400	24686399	FBgn0035049	CG4859	+	0	0	18241.8	11369	2.26	0
chr2R	7045202	7046201	FBgn0033134	CG12840	+	0	0	14191	8810	2.26	0
chr3L	8684704	8685703	NA	NA	+	0	0	11768.1	7313	2.26	0
chr3R	11216336	11217335	FBgn0086472	CG6684	+	0	0	9187.6	5712	2.25	0
chrX	6804985	6805984	FBgn0029903	CG4532	+	0	0	29934.1	18555	2.25	0
chr2L	2863533	2864909	FBgn0031476	CG8813	+	0	0	12854.8	7928	2.25	0
chr2L	5296643	5297642	FBgn0267294	CR45730	+	0	0	24662.3	15233	2.25	0
chr2L	11970302	11971301	FBgn0263019	CR43314	+	0	0	8855.8	5471	2.25	0
chr2L	13835464	13836463	FBgn0064115	CG33649	+	0	0	28866.3	17870	2.25	0
chr2L	14402922	14403921	FBgn0004858	CG4220	+	0	0	10076	6204	2.25	0
chr2L	16888085	16889084	FBgn0260758	CG42556	+	0	0	9575.7	5901	2.24	0
chr2R	7984769	7985768	FBgn0033246	CG11198	+	0	0	15401	9491	2.24	0
chr2R	24687584	24688583	FBgn0035049	CG4859	+	0	0	4012.9	2484	2.24	0
chr3L	5184991	5185990	FBgn0052423	CG32423	+	0	0	32499.9	20032	2.24	0
chr3L	18868198	18869197	FBgn0267572	CR45912	+	0	0	8761	5419	2.24	0
chr3L	22001569	22002568	NA	NA	+	0	0	12859.2	7925	2.24	0
chr3R	7912049	7913048	FBgn0037530	CG2943	+	0	0	8550.2	5275	2.24	0
chr3R	22525210	22526571	FBgn0038981	CG5346	+	0	0	13256	8187	2.23	0
chr3R	23991852	23993093	FBgn0039137	CG13604	+	0	0	70075.4	43241	2.23	0
chr3R	24230297	24231701	FBgn0039172	CG5677	+	0	0	31114.2	19250	2.23	0
chrX	4323799	4325662	FBgn0002707	CG3697	+	0	0	20930.9	12892	2.23	0
chrX	19479615	19480614	FBgn0052533	CG32533	+	0	0	7959.4	4916	2.22	0
chr2L	2968953	2969952	FBgn0024920	CG3181	+	0	0	3391.5	2081	2.22	0
chr2R	16581979	16583315	FBgn0016131	CG5072	+	0	0	27719	16978	2.22	0
chr3L	3544934	3545933	FBgn0005640	CG10579	+	0	0	35530.4	21749	2.21	0
chr3L	12407456	12409316	FBgn0052103	CG32103	+	0	0	32911.3	20142	2.21	0
chr3L	14757908	14758907	FBgn0260233	CG42507	+	0	0	13848.9	8519	2.21	0
chr3R	28623377	28624376	FBgn0039590	CG10011	+	0	0	14821.9	9069	2.21	0
chrX	10718320	10719725	FBgn0052676	CG32676	+	0	0	25881.8	15845	2.2	0
chr2L	6081761	6082760	FBgn0266450	CG45074	+	0	0	32256.3	19710	2.2	0
chr2R	22244579	22245578	FBgn0020307	CG5799	+	0	0	7879.2	4811	2.2	0
chr3L	784378	785377	NA	NA	+	0	0	31668.5	19360	2.2	0
chr3L	16003504	16004503	FBgn0036557	CG5904	+	0	0	21501.3	13121	2.2	0
chr3R	18398703	18399702	FBgn0028670	CG18617	+	0	0	17077	10391	2.19	0
chrX	19153732	19154731	FBgn0261461	CG42274	+	0	0	30754.6	18726	2.19	0
chr2R	8152485	8153484	FBgn0264877	CR44068	+	0	0	7461.3	4517	2.19	0
chr2R	19467541	19468540	FBgn0260934	CG8201	+	0	0	17284.2	10481	2.19	0
chr3L	11525699	11526698	FBgn0259481	CG11711	+	0	0	9297.8	5644	2.19	0
chr3L	19945262	19946261	FBgn0004852	CG7978	+	0	0	17101.1	10348	2.18	0
chr3R	14473533	14474532	FBgn0285955	CG34389	+	0	0	12311.5	7481	2.18	0
chr3R	16223590	16224589	FBgn0267203	CR45643	+	0	0	12603.2	7626	2.18	0
chr3R	25023834	25024833	FBgn0015240	CG11783	+	0	0	14732.9	8903	2.18	0
chrX	5689738	5690737	FBgn0000394	CG12410	+	0	0	4146.4	2510	2.18	0
chr2L	4894031	4895030	FBgn0267280	CR45716	+	0	0	11360.4	6859	2.17	0
chr2L	15912092	15913091	FBgn0032577	CG13244	+	0	0	7723.8	4651	2.17	0
chr2R	10271660	10272659	FBgn0033504	CG18408	+	0	0	16949.4	10225	2.17	0
chr2R	11637209	11638208	FBgn0033638	CG9005	+	0	0	24119.7	14498	2.17	0
chr2R	12928194	12929554	FBgn0033782	CG3850	+	0	0	11515.7	6936	2.16	0
chr3R	5793989	5794988	FBgn0037376	CG2051	+	0	0	8220.5	4963	2.16	0
chrX	18276015	18277014	FBgn0053542	CG33542	+	0	0	29516.9	17800	2.16	0
chr2R	15530859	15531858	FBgn0019968	CG8183	+	0	0	18109.1	10844	2.16	0
chr2R	15674994	15676243	FBgn0266636	CR45143	+	0	0	30591.9	18288	2.15	0
chr3L	1516658	1517657	FBgn0261243	CG1009	+	0	0	28444	17060	2.15	0
chr3L	12487222	12488221	FBgn0036288	CG10660	+	0	0	13819	8276	2.14	0
chr3L	18771300	18772299	FBgn0001078	CG4059	+	0	0	10540.6	6305	2.14	0
chr3R	21348789	21349788	FBgn0038881	CG16791	+	0	0	25684.9	15355	2.14	0
chrX	16421414	16422413	FBgn0026575	CG32575	+	0	0	23057	13773	2.14	0
chr2L	7082475	7083474	FBgn0265822	CR44611	+	0	0	4163.9	2475	2.14	0
chr2L	11065393	11066572	FBgn0032330	CG31868	+	0	0	49833.7	29649	2.14	0
chr2R	12588819	12590178	FBgn0022764	CG8815	+	0	0	63836.5	38021	2.14	0
chr2R	13546149	13547183	FBgn0033853	CG6145	+	0	0	60193.4	35847	2.13	0
chr2R	20320177	20321176	FBgn0034501	CG13868	+	0	0	20691	12343	2.13	0
chr3L	765204	766721	FBgn0052481	CR32481	+	0	0	47790.8	28526	2.13	0
chr3L	5567490	5568489	FBgn0015766	CG10596	+	0	0	4561.4	2717	2.13	0
chr3L	19812858	19813857	FBgn0013799	CG8567	+	0	0	15563.6	9247	2.13	0
chr3R	11200301	11201300	FBgn0261808	CG31299	+	0	0	11651.4	6934	2.13	0
chr3R	18167670	18168669	FBgn0038569	CG7218	+	0	0	18740	11160	2.13	0
chr3R	23898324	23899323	FBgn0016754	CG13598	+	0	0	9482.3	5644	2.12	0
chrX	15048329	15049328	FBgn0030603	CG5541	+	0	0	9173.1	5452	2.11	0
chr2L	13837120	13838119	FBgn0064115	CG33649	+	0	0	6756.7	3995	2.11	0
chr2R	23717868	23718867	FBgn0034898	CG18128	+	0	0	10063.6	5948	2.11	0
chr3L	2256347	2257346	FBgn0015359	CG2034	+	0	0	23527.4	13912	2.11	0
chrX	2180852	2181851	FBgn0040899	CG17776	+	0	0	13661.5	8079	2.11	0
chrX	10111575	10112574	FBgn0083940	CG34104	+	0	0	6835.5	4037	2.11	0
chrX	11422994	11423993	FBgn0001145	CG1743	+	0	0	8955	5302	2.1	0
chr2L	9918006	9919005	FBgn0032160	CG4598	+	0	0	19940.5	11745	2.1	0
chr2L	11039317	11040316	FBgn0032330	CG31868	+	0	0	27515.5	16211	2.1	0
chr2R	14025605	14026604	FBgn0002643	CG8118	+	0	0	22297	13083	2.1	0
chr2R	21611035	21612034	FBgn0034638	CG10433	+	0	0	14642.5	8606	2.1	0
chr3R	30466454	30467453	FBgn0039776	CG31022	+	0	0	12318	7263	2.1	0
chrX	7578995	7579994	NA	NA	+	0	0	8267.9	4853	2.09	0
chrX	9192727	9194231	FBgn0030100	CG12106	+	0	0	14980.2	8808	2.09	0
chr2R	23745345	23746344	FBgn0034899	CG13560	+	0	0	39778.9	23314	2.09	0
chr3L	1638554	1639553	FBgn0035247	CG13929	+	0	0	10285.3	6015	2.09	0
chr3L	7360580	7361579	FBgn0035770	CG8588	+	0	0	8955.7	5249	2.09	0
chr3R	8353350	8354349	FBgn0283560	CR46294	+	0	0	13769.4	8038	2.09	0
chr3R	16071448	16072447	FBgn0038397	CG10185	+	0	0	5664.1	3310	2.08	0
chr2L	2177791	2178907	FBgn0000097	CG3166	+	0	0	57928.8	33755	2.08	0
chr2L	2987855	2988985	FBgn0025681	CG3558	+	0	0	15302.5	8896	2.08	0
chr2R	14333694	14334693	FBgn0085408	CG34379	+	0	0	4465.1	2594	2.08	0
chr2R	16018866	16019865	FBgn0034067	CG8399	+	0	0	6288.5	3658	2.08	0
chr2R	20111319	20112318	FBgn0004364	CG8896	+	0	0	25617	14882	2.07	0
chr2R	21144219	21145218	FBgn0026582	CG9418	+	0	0	9538.5	5541	2.07	0
chr3L	4070699	4071698	FBgn0024179	CG10776	+	0	0	24965	14537	2.07	0
chr3L	11080457	11081456	FBgn0020412	CG6297	+	0	0	11491.7	6692	2.07	0
chr3L	15597050	15598049	FBgn0036518	CG32149	+	0	0	10148.9	5897	2.07	0
chr3R	7540827	7541826	FBgn0015570	CG2505	+	0	0	4177.7	2423	2.07	0
chr3R	24786824	24787823	FBgn0039225	CG6892	+	0	0	6736.3	3924	2.06	0
chr3R	27238846	27239845	FBgn0005696	CG5923	+	0	0	4843.6	2815	2.06	0
chr2L	5237189	5238188	FBgn0003716	CG14026	+	0	0	16270.4	9387	2.06	0
chr2L	18561283	18562282	FBgn0085370	CG34341	+	0	0	6531.3	3767	2.06	0
chr2R	24900961	24901960	FBgn0085434	CG34405	+	0	0	35448	20446	2.06	0
chr2R	25188286	25189285	FBgn0035094	CG9380	+	0	0	7804.8	4500	2.06	0
chr3L	12533789	12534788	FBgn0036300	CG10688	+	0	0	12085.4	6998	2.05	0
chr3R	11962775	11963774	FBgn0000147	CG3068	+	0	0	6269.5	3615	2.05	0
chr3R	14817684	14818683	FBgn0266756	CG44012	+	0	0	20604.2	11877	2.05	0
chr3R	21615375	21616374	FBgn0264826	CR44034	+	0	0	22569.1	13045	2.05	0
chrX	8420821	8421820	FBgn0261793	CG18009	+	0	0	13988.2	8094	2.05	0
chr2L	2165537	2166536	FBgn0000097	CG3166	+	0	0	4745.9	2727	2.05	0
chr2L	2179500	2180499	FBgn0000097	CG3166	+	0	0	18702.8	10724	2.05	0
chr2R	16817912	16819080	FBgn0265530	CR44380	+	0	0	23317.4	13392	2.05	0
chr3L	886429	887428	FBgn0263476	CR43591	+	0	0	10938.8	6295	2.05	0
chr3L	1202800	1203799	FBgn0063667	CG32335	+	0	0	17790.4	10210	2.04	0
chr3L	8425401	8426400	FBgn0020224	CG7037	+	0	0	9288.3	5326	2.04	0
chrX	20481101	20482100	FBgn0031118	CG1412	+	0	0	7955.8	4573	2.04	0
chr2R	5982680	5983679	FBgn0264959	CG44128	+	0	0	19230.8	11017	2.04	0
chr2R	6178876	6179875	FBgn0040502	CG8343	+	0	0	6228.7	3566	2.04	0
chr2R	8722491	8723490	FBgn0005695	CG8411	+	0	0	10315.2	5906	2.04	0
chr2R	16104069	16105068	FBgn0014020	CG8416	+	0	0	13584.2	7754	2.04	0
chr2R	21379025	21380024	FBgn0000395	CG15671	+	0	0	24844.6	14236	2.03	0
chr3L	5808122	5809121	FBgn0035639	CG5537	+	0	0	10413	5961	2.03	0
chr3L	6610363	6611362	FBgn0024177	CG10125	+	0	0	6931.8	3951	2.03	0
chr3R	16355370	16356369	FBgn0038420	CG10311	+	0	0	7790.9	4446	2.03	8.8e-277
chrX	1346719	1347718	FBgn0024361	CG11415	+	0	0	46504.9	26529	2.02	0
chr2L	15745368	15746367	FBgn0266309	CR44974	+	0	0	29196	16552	2.02	0
chr2L	20792440	20793439	FBgn0032886	CG9328	+	0	0	13803.7	7858	2.02	0
chr2R	7566417	7567416	FBgn0050499	CG30499	+	0	0	23447.2	13330	2.02	0
chr2R	7802275	7803274	FBgn0033224	CG1553	+	0	0	17522.7	9929	2.02	0
chr2R	24927156	24928155	FBgn0060296	CG15860	+	0	0	11972.3	6805	2.02	0
chr3L	20509563	20510562	FBgn0052425	CG32425	+	0	0	4866.2	2759	2.02	0
chr3L	21252344	21253343	FBgn0004865	CG18023	+	0	0	20905.4	11862	2.02	0
chr3L	22774330	22775329	FBgn0052451	CG32451	+	0	0	12704.6	7217	2.02	0
chr3R	26876083	26877082	FBgn0004903	CG6354	+	0	0	19366.5	11008	2.01	0
chr3R	30916877	30917876	FBgn0264833	CR44041	+	0	0	6861.7	3899	2.01	0
chrX	767150	768149	FBgn0086666	CR33918	+	0	0	30066.1	17058	1.99	0
chr2L	2199352	2200470	FBgn0085201	CG34172	+	0	0	16677.4	9412	1.99	0
chr2L	9938326	9939325	FBgn0051712	CG31712	+	0	0	10261.3	5798	1.98	0
chr2L	15314625	15315624	NA	NA	+	0	0	12550	7081	1.98	0
chr2R	21645966	21647735	FBgn0034644	CG10082	+	0	0	44823.1	25287	1.98	0
chr3R	9033150	9034149	FBgn0037657	CG11990	+	0	0	25762.9	14569	1.98	0
chr3R	13814643	13815642	FBgn0263650	CR43641	+	0	0	4911.5	2771	1.98	0
chr3R	16331645	16332644	FBgn0040271	CG6725	+	0	0	13203.5	7460	1.97	0
chrX	3871612	3872611	FBgn0265575	CG44402	+	0	0	7995.9	4518	1.97	0
chrX	4706961	4707960	FBgn0029722	CG7024	+	0	0	8230.7	4643	1.97	0
chrX	21352321	21353320	FBgn0015527	CG1685	+	0	0	28345.5	16028	1.97	0
chr2L	6178317	6179316	FBgn0085409	CG34380	+	0	0	29120.8	16399	1.97	0
chr2L	7495446	7496445	FBgn0260486	CG42533	+	0	0	23446.5	13184	1.97	0
chr2R	6715155	6716154	FBgn0033095	CG3409	+	0	0	29987.3	16816	1.96	0
chr2R	15246379	15247378	FBgn0003328	NA	+	0	0	23487.3	13160	1.96	0
chr2R	16385601	16386600	FBgn0262816	CG43187	+	0	0	11733.8	6603	1.96	0
chr3L	311581	312580	FBgn0284444	CG34264	+	0	0	25544.1	14348	1.96	0
chr3R	16348512	16349511	FBgn0027095	CG7013	+	0	0	4877.2	2740	1.96	0
chr3R	30449091	30450090	FBgn0039771	CG15538	+	0	0	32332.2	18121	1.96	0
chrX	2049549	2050548	FBgn0025631	CG4322	+	0	0	5119.3	2873	1.96	0
chrX	19630851	19631850	FBgn0087008	CG12238	+	0	0	21220.5	11902	1.96	1.11e-272
chr2L	1722263	1723262	FBgn0031359	CG18317	+	0	0	6368.7	3550	1.95	0
chr2L	12530778	12531777	FBgn0259176	CG42281	+	0	0	35123.4	19575	1.95	0
chr2R	7822797	7823796	FBgn0003082	CG11205	+	0	0	13373.4	7477	1.95	0
chr2R	8148164	8149163	FBgn0010504	CG11546	+	0	0	6607.9	3701	1.95	0
chr3L	22463807	22464806	FBgn0037163	CG11440	+	0	0	12692.2	7091	1.95	0
chr3L	22823194	22824193	FBgn0027339	CG11352	+	0	0	17433	9746	1.95	0
chr3R	9703854	9704853	FBgn0051352	CG31352	+	0	0	8922.2	4990	1.94	0
chr3R	15091498	15092497	FBgn0038286	CG6966	+	0	0	7499.9	4180	1.94	0
chr3R	30292408	30293407	FBgn0010113	CG15532	+	0	0	6912.1	3855	1.94	0
chr2L	18985051	18986050	FBgn0032734	CG15169	+	0	0	12844.6	7144	1.94	0
chr2R	11659866	11660865	FBgn0011916	CR32844	+	0	0	28748.9	16005	1.94	4.63e-182
chr2R	19462231	19463230	FBgn0260934	CG8201	+	0	0	13588.6	7549	1.93	0
chr3L	7131178	7132177	FBgn0035742	CG8629	+	0	0	13415.7	7446	1.93	0
chr3L	15692202	15693201	FBgn0085481	CG34452	+	0	0	10813.4	6012	1.93	0
chr3R	11669322	11670321	FBgn0037930	CG14715	+	0	0	26118.1	14491	1.93	0
chr3R	21869731	21870730	FBgn0051174	CG31174	+	0	0	13042.3	7239	1.92	0
chr3R	31067271	31068270	FBgn0024288	CG15552	+	0	0	25465.3	14130	1.92	0
chr2L	300675	301674	FBgn0004611	CG4574	+	0	0	17598.5	9704	1.92	0
chr3R	4469737	4470736	FBgn0051523	CG31523	+	0	0	36134.3	19973	1.92	0
chr3R	12430253	12431252	FBgn0086134	CG5266	+	0	0	8262.1	4577	1.92	0
chrX	6803836	6804835	FBgn0029903	CG4532	+	0	0	52447.7	29012	1.92	0
chrX	8507444	8508443	FBgn0053181	CG33181	+	0	0	8885.7	4896	1.92	0
chrX	11681804	11682803	FBgn0030323	CG2371	+	0	0	6894.6	3811	1.92	0
chrX	15733096	15734095	FBgn0026666	CG8198	+	0	0	8401.4	4640	1.91	0
chrX	19353572	19354571	FBgn0031016	CG12199	+	0	0	9706.2	5358	1.91	0
chr2L	13511677	13512676	FBgn0023407	CG9239	+	0	0	12492.3	6852	1.91	0
chr2R	6245198	6246197	FBgn0033075	NA	+	0	0	9047.6	4975	1.91	0
chr2R	9413856	9414855	FBgn0016078	CG8804	+	0	0	12051.1	6607	1.91	0
chr2R	9826912	9827911	FBgn0033447	CG1625	+	0	0	11016.1	6062	1.91	0
chr2R	13337030	13338029	FBgn0265104	CR44206	+	0	0	17367.3	9551	1.91	0
chr3R	25027272	25028271	FBgn0039259	CG11781	+	0	0	5931.1	3254	1.91	0
chr2L	7013533	7014532	FBgn0031879	CG9138	+	0	0	3720.4	2038	1.9	0
chr3L	566427	567426	FBgn0035142	CG17090	+	0	0	3625.6	1979	1.9	0
chr3L	3036553	3037552	FBgn0035388	CG2162	+	0	0	10461.8	5706	1.9	0
chr3R	5215762	5216761	FBgn0259212	CG42312	+	0	0	102666	56011	1.9	0
chr3R	23940993	23941992	FBgn0001098	CG5320	+	0	0	16477.5	8992	1.9	0
chrX	1281582	1282581	FBgn0025642	CG32812	+	0	0	26061.9	14205	1.9	0
chrX	3868276	3869275	FBgn0265575	CG44402	+	0	0	8165.1	4469	1.9	0
chr2R	9603720	9604719	FBgn0261016	CG42600	+	0	0	4702.9	2557	1.9	0
chr2R	22561012	22562011	FBgn0003175	CG4444	+	0	0	4390.7	2392	1.9	0
chr3R	10885095	10886094	FBgn0037856	CG4674	+	0	0	37165.6	20215	1.9	0
chr3R	29781757	29782756	FBgn0001297	CG33956	+	0	0	20766.1	11267	1.9	0
chrX	9598792	9599791	FBgn0030141	CG3002	+	0	0	40896.2	22186	1.9	0
chrX	9641098	9642097	FBgn0028341	CG32697	+	0	0	22871.8	12424	1.9	1.14e-177
chr2L	4378786	4379785	FBgn0026319	CG3048	+	0	0	11663.1	6303	1.89	0
chr3L	5656297	5657296	FBgn0035626	CG17334	+	0	0	11271.4	6088	1.89	0
chr3L	18756712	18757711	FBgn0001078	CG4059	+	0	0	24301.3	13132	1.89	0
chr3R	5672598	5673597	FBgn0037363	CG1347	+	0	0	13080.9	7065	1.89	0
chr3R	8120385	8121384	FBgn0037549	CG7878	+	0	0	22753.6	12292	1.89	0
chr3R	18252295	18253294	FBgn0263757	CG43662	+	0	0	8292	4480	1.89	0
chr3R	21194262	21195261	FBgn0264357	CG17299	+	0	0	28501.6	15378	1.89	0
chr3R	31713276	31714275	FBgn0003870	CG1856	+	0	0	46903.9	25368	1.88	0
chrX	2465824	2466823	FBgn0040388	CG32796	+	0	0	16468.8	8879	1.88	0
chrX	15500966	15502809	FBgn0266182	CR44888	+	0	0	24306.4	13124	1.88	0
chr2L	3362679	3363678	FBgn0085423	CG34394	+	0	0	12302.7	6624	1.88	0
chr2R	6650138	6651137	FBgn0029131	CG33134	+	0	0	10600.4	5714	1.88	0
chr2R	16666109	16667108	FBgn0024315	CG8098	+	0	0	10203.6	5479	1.88	0
chrX	2317276	2318275	FBgn0003079	CG2845	+	0	0	5306.8	2849	1.88	0
chr2L	2993043	2994042	FBgn0002989	CG3736	+	0	0	11515	6155	1.87	0
chr3L	3046155	3047154	FBgn0052485	CG32485	+	0	0	33020.7	17616	1.87	0
chr3R	23345730	23346729	FBgn0264326	CG6768	+	0	0	7384.7	3939	1.87	0
chrX	4574599	4575598	FBgn0029717	CG12684	+	0	0	11609.1	6206	1.87	0
chrX	4606094	4607093	FBgn0052773	CR32773	+	0	0	15183.7	8109	1.87	0
chrX	11339518	11340517	FBgn0085377	CG34348	+	0	0	7666.2	4109	1.87	0
chr2L	19947923	19948922	FBgn0263873	CG43720	+	0	0	14113.7	7507	1.86	0
chr2R	21082855	21083854	FBgn0003748	CG9364	+	0	0	20906.1	11132	1.86	0
chr2R	21541963	21542962	FBgn0003731	CG10079	+	0	0	18942	10063	1.86	0
chr3L	11209777	11210776	FBgn0061469	CG6190	+	0	0	19083.5	10170	1.86	0
chr3R	13032422	13033421	FBgn0003308	CG7642	+	0	0	12184.6	6470	1.85	0
chrX	17826807	17827806	FBgn0030870	CG6398	+	0	0	6747.2	3586	1.85	0
chrX	21377489	21378488	FBgn0003423	CG1417	+	0	0	16139.8	8605	1.85	0
chr2R	10645416	10646415	FBgn0033541	CG12934	+	0	0	49879.7	26384	1.85	0
chr3L	8550095	8551094	FBgn0260442	CG6831	+	0	0	8815.7	4656	1.85	0
chr3R	20563359	20564358	FBgn0038803	CG5191	+	0	0	13426.6	7121	1.85	0
chr3R	25056773	25057772	FBgn0051111	CG31111	+	0	0	9323.3	4933	1.85	0
chrX	1619883	1620882	FBgn0283451	CG11491	+	0	0	31731.9	16804	1.85	0
chrX	16278245	16279244	FBgn0000536	CG3525	+	0	0	16425.7	8704	1.85	0
chrX	17875953	17876952	FBgn0259168	CG42273	+	0	0	7460.5	3941	1.85	0
chr2L	7992846	7993845	FBgn0266331	CR44996	+	0	0	47928.6	25214	1.84	0
chr2L	9986163	9987162	FBgn0040965	CR13130	+	0	0	8216.9	4332	1.84	0
chr2R	20534023	20535022	FBgn0034513	CG13423	+	0	0	5908.5	3113	1.84	0
chr2R	24979959	24980958	FBgn0010435	CG2727	+	0	0	39568.1	20879	1.84	0
chr3R	5263451	5264450	FBgn0264785	CG44015	+	0	0	13516.4	7129	1.84	1.53e-292
chr3R	5670814	5671813	FBgn0037363	CG1347	+	0	0	8610	4531	1.84	5.55e-315
chr3R	11565723	11566722	FBgn0263316	CG14709	+	0	0	25593	13490	1.83	0
chr3R	18747663	18748662	FBgn0024329	CG7717	+	0	0	12933.6	6811	1.83	0
chr3R	26555471	26556470	FBgn0263289	CG43398	+	0	0	26357.3	13885	1.83	0
chr3R	29156525	29157524	FBgn0039644	CG11897	+	0	0	17130.3	9037	1.83	0
chrX	2136169	2137296	FBgn0004861	CG18412	+	0	0	48546.4	25593	1.83	0
chrX	3136277	3137276	FBgn0004647	CG3936	+	0	0	2398.8	1262	1.83	2.91e-244
chrX	12735661	12736660	FBgn0265523	CG4013	+	0	0	21801.1	11490	1.83	1.37e-240
chr2R	9587960	9588959	FBgn0261016	CG42600	+	0	0	32236.6	16847	1.82	0
chr2R	21699746	21700745	FBgn0266346	CG17922	+	0	0	27717.6	14540	1.82	0
chr2R	25008082	25009081	FBgn0004055	CG3533	+	0	0	11833	6202	1.82	0
chr3L	17005320	17006319	FBgn0036684	CG3764	+	0	0	38633.8	20246	1.82	0
chr3L	22267495	22268494	FBgn0004179	CG6395	+	0	0	23874.6	12475	1.82	0
chr3R	20984488	20985487	FBgn0013995	CG5685	+	0	0	16145.7	8444	1.82	0
chr3R	24319443	24320442	FBgn0267762	CR46093	+	0	0	12710.4	6648	1.81	0
chrX	5517649	5518648	FBgn0267074	CR45518	+	0	0	8300	4345	1.81	0
chr2L	4980826	4981825	FBgn0031664	CG8892	+	0	0	12638.2	6595	1.81	0
chr2L	5977670	5979405	FBgn0000308	CG9553	+	0	0	53825.5	27976	1.81	0
chr2L	6683561	6684560	FBgn0028703	CG11328	+	0	0	69983.5	36509	1.81	0
chr2L	12589278	12590515	FBgn0085424	CG34395	+	0	0	24295.4	12679	1.81	0
chr2R	17086518	17087517	FBgn0050460	CG30460	+	0	0	32049.2	16672	1.81	0
chr3R	17146059	17147058	FBgn0264291	CG12265	+	0	0	14397.4	7512	1.81	0
chrX	1380075	1381074	FBgn0024986	CG3719	+	0	0	43035.4	22435	1.8	0
chrX	13410514	13411513	FBgn0030485	CG1998	+	0	0	21882	11384	1.8	0
chr2L	2750304	2751711	FBgn0031453	CG9894	+	0	0	91465.1	47383	1.8	0
chr2R	12437700	12438699	FBgn0033738	CG8830	+	0	0	12364.7	6402	1.8	0
chr2R	16783771	16784770	FBgn0034158	CG5522	+	0	0	18532.8	9618	1.8	0
chr3L	14106614	14107613	FBgn0036411	CG7345	+	0	0	8567.7	4448	1.8	0
chr2L	1118400	1119399	FBgn0016926	CG4710	+	0	0	15929.8	8193	1.8	0
chr3L	16799562	16800561	FBgn0021768	CG9710	+	0	0	2336.8	1207	1.8	0
chr3R	22367373	22368372	FBgn0038950	CG5382	+	0	0	15080.8	7767	1.79	0
chr3R	24702725	24703724	FBgn0003429	CG10693	+	0	0	17954.5	9277	1.79	0
chr3R	25996112	25997111	FBgn0002734	CG8328	+	0	0	23525.2	12143	1.79	0
chr2L	10003909	10004908	FBgn0051875	CG31875	+	0	0	7408.8	3794	1.79	0
chr2R	6502035	6503034	FBgn0086655	CG9397	+	0	0	12413.6	6373	1.79	0
chr3L	684977	685976	FBgn0035154	CG3344	+	0	0	18069.7	9274	1.79	0
chr3R	9437793	9438792	FBgn0261552	CG42670	+	0	0	7786.6	3994	1.79	0
chr3R	12647459	12648458	FBgn0038070	CG6753	+	0	0	38417.2	19653	1.79	0
chr3R	21246761	21247760	FBgn0038874	CG5911	+	0	0	6295	3222	1.79	0
chr2L	18819931	18820930	FBgn0032713	CG17323	+	0	0	3395.9	1732	1.78	0
chr2R	7614804	7615803	FBgn0033196	CG1358	+	0	0	15798.5	8073	1.78	0
chr3L	18272108	18273107	NA	NA	+	0	0	10820.7	5508	1.78	0
chr3R	16005595	16006594	FBgn0038391	CG10278	+	0	0	16374	8359	1.78	0
chr3R	18449918	18450917	FBgn0004652	CG14307	+	0	0	11358.2	5785	1.78	0
chr3R	29492715	29493714	FBgn0039666	CG11501	+	0	0	5616.7	2870	1.78	0
chrX	1370431	1371430	FBgn0023169	CG3051	+	0	0	17365.1	8852	1.78	0
chrX	4584250	4585249	FBgn0052773	CR32773	+	0	0	6360.7	3246	1.78	0
chr2L	321833	323093	FBgn0031248	CG11912	+	0	0	14417.8	7309	1.78	9.78e-296
chr2R	12173128	12174127	FBgn0286006	CR42931	+	0	0	12760	6484	1.78	2.70e-311
chr3L	2770158	2771157	FBgn0035371	CG9977	+	0	0	5764.8	2932	1.77	0
chr3L	19906599	19907598	FBgn0036915	CG7757	+	0	0	20365	10337	1.77	0
chr3L	22671376	22672375	FBgn0262249	CR42956	+	0	0	35569.8	18013	1.77	0
chrX	1826261	1827260	FBgn0029590	CG14811	+	0	0	12544.9	6352	1.77	0
chr2R	18800076	18801075	FBgn0265661	CR44468	+	0	0	23641.9	11948	1.77	0
chr3L	8705248	8706247	NA	NA	+	0	0	10062.9	5093	1.77	0
chr3R	7906414	7907413	FBgn0037530	CG2943	+	0	0	13062	6582	1.77	0
chrX	8895383	8896382	FBgn0011661	CG10701	+	0	0	6640.8	3348	1.77	0
chrX	19260652	19261651	FBgn0040068	CG7893	+	0	0	14333.2	7238	1.77	0
chr2R	13233935	13234934	FBgn0033817	CG4688	+	0	0	10181	5122	1.77	9.08e-294
chr3R	31724457	31725456	FBgn0003870	CG1856	+	0	0	15419.2	7757	1.76	0
chr2L	5292377	5293376	FBgn0265956	CR44743	+	0	0	20585.2	10262	1.76	0
chr3L	8288686	8289685	FBgn0027569	CG7207	+	0	0	13885.4	6918	1.76	0
chr2L	2167493	2168492	FBgn0000097	CG3166	+	0	0	13579.1	6717	1.76	0
chr2R	7758667	7759666	FBgn0266526	NA	+	0	0	6079.1	3014	1.76	0
chr2R	22180698	22181697	FBgn0034708	CG5625	+	0	0	10315.2	5103	1.76	0
chr3R	20542578	20543577	FBgn0016917	CG4257	+	0	0	15512.6	7692	1.76	0
chr3R	26226122	26227121	FBgn0265379	CR44320	+	0	0	9746.3	4827	1.76	0
chr3R	30021577	30022576	FBgn0267780	CR46111	+	0	0	14063.4	6947	1.76	0
chrX	1183312	1184311	FBgn0040361	CG14627	+	0	0	13870.8	6871	1.76	0
chrX	9584466	9585465	FBgn0001186	CG3001	+	0	0	25021.2	12399	1.76	1.25e-286
chrX	16440559	16441558	FBgn0030753	CG4420	+	0	0	23133.6	11439	1.75	0
chr2L	16283849	16284848	FBgn0040079	CG4132	+	0	0	15910.8	7828	1.75	0
chr2R	16587298	16588297	FBgn0034141	CG8311	+	0	0	3164.7	1562	1.75	0
chr2R	21032083	21033082	FBgn0266641	CR45148	+	0	0	8997.3	4439	1.75	0
chr3L	12500924	12501923	FBgn0036289	CG10657	+	0	0	11181.7	5518	1.75	0
chr2L	6080067	6081066	FBgn0266450	CG45074	+	0	0	36322.5	17776	1.75	0
chr2R	7718945	7719944	FBgn0042135	CG18812	+	0	0	41685.4	20415	1.75	0
chr3L	2417157	2418156	FBgn0266696	CG45186	+	0	0	11474.2	5637	1.75	0
chrX	7303474	7304473	FBgn0029941	CG1677	+	0	0	7501.4	3686	1.75	0
chrX	8242606	8243605	FBgn0030026	CG10964	+	0	0	29336	14353	1.74	0
chrX	11873089	11874088	FBgn0030346	CG11802	+	0	0	6150.6	3020	1.74	0
chrX	13245367	13246366	FBgn0004456	CG1771	+	0	0	10059.2	4932	1.74	0
chr2L	2371087	2372086	FBgn0031420	CG9866	+	0	0	18302.4	8947	1.74	0
chr2L	9619834	9620833	FBgn0032135	CG3881	+	0	0	5557.7	2717	1.74	0
chr2R	18620676	18621675	FBgn0266671	CG5341	+	0	0	10366.3	5066	1.74	0
chr3L	2569800	2570799	FBgn0010909	CG16973	+	0	0	17025.3	8288	1.74	1.33e-267
chr3L	16159223	16160222	FBgn0036576	CG5151	+	0	0	10669.7	5193	1.73	0
chr3R	15995106	15996105	FBgn0003507	CG3992	+	0	0	54481.9	26548	1.73	0
chrX	13678856	13679855	FBgn0030511	CG11158	+	0	0	9792.3	4776	1.73	0
chrX	14483345	14484344	FBgn0030569	CG9411	+	0	0	7221.3	3524	1.73	0
chrX	19305170	19306169	FBgn0031012	CG8051	+	0	0	12339.2	6032	1.73	0
chr2R	9139295	9140294	FBgn0260972	CG8057	+	0	0	4233.2	2058	1.73	0
chr3L	12084336	12085335	FBgn0036246	CG17154	+	0	0	5708.6	2771	1.73	0
chr3L	19896848	19897847	FBgn0052218	CR32218	+	0	0	18090.1	8800	1.73	0
chr3R	17964718	17965717	FBgn0263995	CG43738	+	0	0	6990.8	3400	1.73	0
chr3R	21719455	21720454	FBgn0051176	CG31176	+	0	0	5554.7	2690	1.72	0
chrX	7707259	7708258	FBgn0029504	CG12690	+	0	0	18474.5	8971	1.72	0
chr2R	24984991	24986767	FBgn0010435	CG2727	+	0	0	33060.8	15960	1.72	0
chr3L	3165018	3166017	FBgn0035407	CG14962	+	0	0	9804.7	4730	1.72	0
chr3L	3302142	3303141	FBgn0035432	CG17723	+	0	0	15044.3	7273	1.72	0
chrX	6546438	6547437	FBgn0085446	CG34417	+	0	0	15040.7	7280	1.72	0
chrX	15702947	15703946	FBgn0030670	CG9245	+	0	0	7184.1	3476	1.72	0
chrX	19667788	19668794	FBgn0004057	CG12529	+	0	0	76093.3	36691	1.72	0
chr2L	8130254	8131253	FBgn0031987	CG12375	+	0	0	16732.8	8037	1.72	0
chr2R	7499700	7500699	FBgn0261397	CG2146	+	0	0	25463.1	12216	1.72	5.01e-263
chr2R	15999842	16000841	FBgn0020236	CG8322	+	0	0	27518.5	13210	1.72	4.38e-243
chr3L	7094497	7095496	FBgn0053556	CG33556	+	0	0	12540.5	6015	1.72	1.03e-228
chrX	1170089	1171088	FBgn0040364	CG11378	+	0	0	8710.7	4187	1.71	0
chr3L	1885825	1886824	FBgn0000109	CG18315	+	0	0	9297.1	4443	1.71	0
chr3R	8927320	8928319	FBgn0262614	CG43140	+	0	0	8897.4	4252	1.71	0
chr3R	14679608	14680607	FBgn0265140	CG7649	+	0	0	13415	6407	1.71	0
chrX	5744480	5745479	FBgn0261383	CG3125	+	0	0	17074.9	8159	1.71	1.12e-301
chrX	9060651	9061650	FBgn0030077	CG15365	+	0	0	20947	10030	1.7	0
chrX	19665547	19666546	FBgn0031054	CG14216	+	0	0	29089.5	13895	1.7	0
chr2L	2769386	2770385	FBgn0031459	CG2862	+	0	0	4266.7	2034	1.7	0
chr2L	9613086	9614085	FBgn0032135	CG3881	+	0	0	15492.9	7394	1.7	0
chr3R	4462124	4463123	FBgn0051522	CG31522	+	0	0	5876.4	2796	1.7	0
chrX	1239489	1240488	FBgn0026876	CG11403	+	0	0	21696	10342	1.7	0
chrX	6868217	6869216	FBgn0029915	CG14434	+	0	0	17301.7	8226	1.7	0
chrX	7299485	7300484	FBgn0265457	CR44357	+	0	0	8177.5	3897	1.69	0
chr2L	9782526	9783525	FBgn0032147	CG4026	+	0	0	14339.1	6801	1.69	0
chr2L	15332616	15333615	FBgn0001981	CG3758	+	0	0	3364.5	1592	1.69	0
chr2R	25000998	25001997	FBgn0265434	CG15792	+	0	0	28463	13488	1.69	0
chr3R	5658950	5659949	FBgn0264902	CR44093	+	0	0	23299.2	11024	1.69	0
chr3R	9048799	9049798	FBgn0037659	CG11033	+	0	0	18594.1	8812	1.69	0
chr3R	9769291	9770290	FBgn0037751	CG8484	+	0	0	6289.9	2985	1.68	0
chr3R	16234322	16235321	FBgn0040071	CG6889	+	0	0	9439.3	4463	1.68	0
chr2R	9839201	9840200	FBgn0033448	CG1623	+	0	0	13927.7	6541	1.68	0
chr2R	18503408	18504407	FBgn0034354	CG5224	+	0	0	23590.2	11061	1.68	0
chr2R	24944849	24945848	FBgn0035082	CG2811	+	0	0	40350.7	18900	1.68	0
chr3L	18015520	18016519	FBgn0000568	CG8127	+	0	0	10251.8	4814	1.68	0
chr3R	30498432	30499431	FBgn0039780	CG9728	+	0	0	11663.8	5480	1.68	0
chrX	789698	790986	FBgn0265662	CR44469	+	0	0	22134.4	10384	1.68	0
chrX	1171838	1172837	FBgn0040364	CG11378	+	0	0	12181.6	5725	1.68	0
chr2L	8704745	8705744	FBgn0004914	CG9310	+	0	0	10726.6	5021	1.68	0
chr2R	8653352	8654351	FBgn0003892	CG2411	+	0	0	4982.2	2325	1.68	8.2e-228
chr2R	13232333	13233332	FBgn0033815	CG4676	+	0	0	21017	9829	1.68	1.37e-209
chr2R	24540101	24541100	FBgn0035021	CG4622	+	0	0	15409	7216	1.67	0
chr3L	8701500	8702499	NA	NA	+	0	0	23879.7	11163	1.67	0
chr3L	14751207	14752206	FBgn0260233	CG42507	+	0	0	4532.9	2122	1.67	0
chr3R	14069710	14070709	FBgn0038197	CG3143	+	0	0	5771.4	2697	1.67	0
chr2R	6022328	6023327	FBgn0033051	CG7863	+	0	0	8714.3	4062	1.67	0
chr2R	21250018	21251017	FBgn0034606	CG18375	+	0	0	14032.7	6542	1.67	0
chr2L	9064944	9065943	FBgn0051708	CG31708	+	0	0	14351.5	6633	1.67	0
chr2R	11191979	11192978	FBgn0003396	CG7734	+	0	0	16143.5	7488	1.66	0
chr3R	29214591	29215590	FBgn0262404	CR42947	+	0	0	26245	12176	1.66	0
chrX	1177479	1178478	FBgn0040363	CG11384	+	0	0	14720.5	6826	1.66	0
chr2L	17388995	17389994	FBgn0020503	CG5020	+	0	0	5750.9	2656	1.66	0
chr2R	18802950	18803949	FBgn0265661	CR44468	+	0	0	24906.6	11455	1.66	0
chr3L	7344501	7345500	FBgn0035767	CG8596	+	0	0	21758.8	10020	1.66	0
chrX	16572645	16573644	FBgn0267912	CG9819	+	0	0	9965.1	4588	1.66	0
chr3L	340395	341394	FBgn0035132	CG17061	+	0	0	13020.4	5981	1.65	0
chr3L	8347220	8348219	FBgn0035879	CG7112	+	0	0	7273.1	3342	1.65	0
chr3R	14295071	14296070	FBgn0285913	CG12207	+	0	0	23966.5	10990	1.65	0
chr3R	25292387	25293386	FBgn0051098	CG31098	+	0	0	9871.8	4518	1.65	0
chr3R	25885502	25886501	FBgn0028717	CG17367	+	0	0	23338.5	10693	1.65	0
chr2L	5255899	5256898	FBgn0003716	CG14026	+	0	0	6846.4	3128	1.65	0
chr2R	9148766	9149765	FBgn0050345	CG30345	+	0	0	9523.9	4353	1.65	0
chr2R	12529813	12530812	FBgn0011592	CG8581	+	0	0	5085.8	2323	1.65	1.14e-195
chr3L	9360011	9361010	FBgn0085485	CG34456	+	0	0	13091.1	5977	1.64	0
chr3R	31195887	31196886	FBgn0051004	CG31004	+	0	0	11170	5091	1.64	0
chr2R	13853746	13854745	FBgn0033879	CG6543	+	0	0	19855.2	9040	1.64	0
chr3L	13254753	13255752	FBgn0023095	CG11282	+	0	0	5255.7	2390	1.64	0
chr3R	15834352	15835351	FBgn0003227	CG31293	+	0	0	4931.1	2246	1.64	0
chrX	1615807	1616806	FBgn0283451	CG11491	+	0	0	17391.4	7920	1.64	0
chrX	5901081	5902080	FBgn0029821	CG4020	+	0	0	24364	11057	1.63	0
chr3R	18915410	18916409	FBgn0261113	CG17836	+	0	0	7778.5	3514	1.63	0
chrX	2145718	2146717	FBgn0004654	CG3724	+	0	0	10066.5	4562	1.63	0
chrX	4678362	4679361	FBgn0262699	CG3000	+	0	0	13073.6	5911	1.63	0
chrX	21518712	21519711	FBgn0266457	CR45082	+	0	0	4078.5	1845	1.63	0
chr2L	8416914	8417913	FBgn0032042	CG13398	+	0	0	24616.4	11113	1.63	0
chr3L	7865586	7866585	FBgn0016694	CG17888	+	0	0	9836	4424	1.63	1.24e-152
chr3R	5843124	5844123	FBgn0037389	CR10991	+	0	0	21809.8	9829	1.62	0
chr2R	10276029	10277028	FBgn0033504	CG18408	+	0	0	20515.9	9196	1.62	0
chr3L	7530014	7531013	FBgn0028582	CG8532	+	0	0	11366.2	5098	1.62	0
chr3L	8458029	8459028	FBgn0010825	CG6964	+	0	0	18478.1	8297	1.62	0
chrX	6777052	6778051	FBgn0003390	CG3135	+	0	0	17058.1	7655	1.62	0
chr2L	17448972	17449971	FBgn0032637	CG5050	+	0	0	7316.9	3270	1.62	0
chr2R	9890004	9891003	FBgn0033463	CG1513	+	0	0	17990.9	8048	1.62	0
chr2R	24187071	24188070	FBgn0266083	CG3363	+	0	0	13042.3	5830	1.62	0
chr3L	11045008	11046007	FBgn0266594	CR45119	+	0	0	9541.4	4263	1.62	0
chrX	2121978	2122977	FBgn0004860	CG3895	+	0	0	26220.9	11716	1.62	0
chrX	11695567	11696566	FBgn0011754	CG1830	+	0	0	3829.1	1710	1.62	0
chrX	19315328	19316327	FBgn0259834	CG8062	+	0	0	10767.4	4803	1.62	0
chr2R	15816684	15817683	FBgn0265991	CG30084	+	0	0	6004	2663	1.62	0
chr3L	20187849	20188848	FBgn0036945	CG6981	+	0	0	41795.5	18596	1.62	0
chr3R	12365559	12366558	FBgn0042206	CG18548	+	0	0	6063.8	2698	1.62	0
chr3R	20790982	20791981	FBgn0038826	CG17838	+	0	0	15611.8	6925	1.62	0
chrX	1242042	1243041	FBgn0026876	CG11403	+	0	0	4415.5	1963	1.62	3.05e-174
chrX	2592696	2593695	FBgn0001404	CG9659	+	0	0	12973	5775	1.61	0
chrX	17624694	17625693	FBgn0030850	CG8408	+	0	0	18602.9	8251	1.61	0
chr3L	1318967	1319966	FBgn0010246	CG9155	+	0	0	18672.9	8274	1.61	0
chr3L	18104631	18105630	FBgn0002901	CG7347	+	0	0	16984.4	7519	1.61	0
chrX	19565450	19566449	FBgn0000257	CG12230	+	0	0	23959.2	10587	1.6	0
chr2L	20890235	20891234	FBgn0263996	CG43739	+	0	0	7685.2	3379	1.6	0
chr2R	13936240	13937239	FBgn0013733	CG18076	+	0	0	13994.1	6159	1.6	6.59e-238
chr2R	21361679	21362678	FBgn0000395	CG15671	+	0	0	1825.6	803	1.6	8.26e-188
chr2R	23981614	23982613	FBgn0034948	CG3825	+	0	0	20313.2	8932	1.59	0
chrX	19179869	19180868	FBgn0030992	CG33253	+	0	0	38494.5	16990	1.59	0
chr3L	9614999	9615998	FBgn0267348	CG3322	+	0	0	11445.7	5028	1.59	0
chr3R	5571128	5572127	FBgn0023023	CG1411	+	0	0	37502.6	16443	1.59	0
chr3R	23518216	23519215	FBgn0039081	CG4370	+	0	0	9497.6	4171	1.59	3.21e-298
chrX	10886795	10887794	FBgn0267177	CR45617	+	0	0	9025.7	3959	1.59	4.75e-257
chr2L	1116574	1117573	FBgn0016926	CG4710	+	0	0	12601	5503	1.58	0
chr2L	8381493	8382492	FBgn0032036	CG13384	+	0	0	21631.9	9460	1.58	0
chr3R	21127343	21128342	FBgn0038860	CG10825	+	0	0	15047.3	6569	1.58	0
chr3R	23782067	23783066	FBgn0039120	CG10198	+	0	0	19527.7	8516	1.57	0
chr3R	30100233	30101232	FBgn0266411	CG45051	+	0	0	12743.2	5559	1.57	0
chrX	2141971	2142970	FBgn0004861	CG18412	+	0	0	10371.4	4533	1.57	1.97e-269
chr2L	14355895	14356894	FBgn0266145	CR44851	+	0	0	29929.7	12996	1.57	1.28e-250
chr2R	10649017	10650016	FBgn0033541	CG12934	+	0	0	14052.4	6111	1.56	0
chr3R	5761716	5762715	FBgn0266672	CG2095	+	0	0	5266.7	2291	1.56	0
chr3R	9225924	9226923	FBgn0003165	CG9755	+	0	0	10310.1	4482	1.56	0
chr3R	19909304	19910303	FBgn0266408	CR45048	+	0	0	34413.7	14936	1.56	0
chr3R	24798903	24799902	FBgn0039226	CG18410	+	0	0	20348.2	8860	1.56	0
chr3R	31689251	31690250	FBgn0267124	CR45564	+	0	0	31849.3	13843	1.56	0
chrX	6284849	6285848	FBgn0029856	CG11700	+	0	0	6779.3	2946	1.56	0
chr2L	3057701	3058700	FBgn0283427	CG3523	+	0	0	31188.6	13513	1.56	0
chr2R	9609456	9610455	FBgn0033437	CG12926	+	0	0	17239.7	7473	1.56	0
chr2R	22669552	22670551	FBgn0040658	CG13516	+	0	0	21068.8	9118	1.55	0
chr3L	10897481	10898480	FBgn0036111	CG6391	+	0	0	29569.4	12775	1.55	0
chr3R	23047380	23048379	FBgn0041225	CG31280	+	0	0	31060.2	13446	1.55	0
chrX	8890177	8891176	FBgn0011661	CG10701	+	0	0	44847.1	19378	1.55	2.29e-206
chr2L	1447468	1448467	NA	NA	+	0	0	20964.5	9046	1.55	5.15e-156
chr2L	1460219	1461218	NA	NA	+	0	0	20662.5	8896	1.54	0
chr2L	3477905	3478904	FBgn0261560	CG8846	+	0	0	21028.7	9045	1.54	0
chr2L	10009580	10010579	FBgn0011584	CG4758	+	0	0	14948.1	6433	1.54	0
chr2R	15768912	15769911	FBgn0265991	CG30084	+	0	0	15666.5	6756	1.53	0
chr2R	20834872	20835871	FBgn0016984	CG9985	+	0	0	20552.4	8866	1.53	0
chr3L	1347185	1348184	FBgn0035213	CG2199	+	0	0	18500.7	7986	1.53	0
chr3R	10282620	10283619	FBgn0011970	CR31396	+	0	0	8123.5	3497	1.53	0
chr3R	22411817	22412816	FBgn0261279	CG42250	+	0	0	7650.2	3296	1.53	1.34e-199
chrX	636156	637155	FBgn0020381	CG7486	+	0	0	33464.1	14452	1.52	0
chr2L	12365444	12366443	FBgn0262475	CG43065	+	0	0	12061.3	5174	1.52	0
chr3R	15229210	15230209	FBgn0085345	CG34316	+	0	0	9478.7	4044	1.52	0
chrX	18645647	18646646	FBgn0027335	CG6606	+	0	0	42846.5	18313	1.52	0
chr2R	13925874	13926873	FBgn0013733	CG18076	+	0	0	11024.2	4687	1.52	0
chr2R	21606104	21607103	FBgn0266643	CR45150	+	0	0	11137.9	4737	1.52	7.03e-241
chr2R	22324465	22325464	FBgn0016053	CG32885	+	0	0	24885.5	10597	1.52	2.97e-185
chr3L	159576	160575	FBgn0035101	CG1212	+	0	0	25377.1	10813	1.52	4.73e-172
chr3R	22749159	22750158	FBgn0051139	CG31139	+	0	0	9181.1	3911	1.51	0
chr2L	10514121	10515120	FBgn0010398	CG6098	+	0	0	17102.6	7249	1.51	0
chr3L	12798503	12799502	FBgn0260945	CG10967	+	0	0	17013.6	7218	1.51	0
chr3L	21204527	21205526	FBgn0037057	CG10512	+	0	0	38149.5	16154	1.51	0
chr3R	20781400	20782399	FBgn0038826	CG17838	+	0	0	32532.7	13775	1.51	0
chr2L	5805027	5806026	FBgn0265786	CR44575	+	0	0	4142	1748	1.51	9.34e-216
chr2L	19967102	19968101	FBgn0042129	CG18806	+	0	0	2306.9	972	1.5	0
chr2R	11196798	11197797	FBgn0003396	CG7734	+	0	0	12438.4	5247	1.5	0
chrX	6061789	6062788	FBgn0029835	CG5921	+	0	0	28818.2	12172	1.5	0
chrX	16281499	16282706	FBgn0000536	CG3525	+	0	0	30838.5	12985	1.5	0
chr2R	21048921	21049920	FBgn0003391	CG3722	+	0	0	14338.3	6033	1.5	0
chr3L	216943	217942	FBgn0035110	CG17143	+	0	0	8526.1	3587	1.5	0
chr3L	781088	782087	NA	NA	+	0	0	9127.8	3836	1.5	0
chr3R	22685801	22686800	FBgn0046114	CG4919	+	0	0	38927	16374	1.5	1.19e-259
chr2R	7533378	7534377	FBgn0033190	CG2137	+	0	0	29511	12341	1.5	6.49e-207
chr2R	21312326	21313325	FBgn0034618	CG9485	+	0	0	23467.6	9839	1.5	5.72e-180
chr2L	5096006	5097005	FBgn0031681	CG31651	+	0	0	23602.6	9828	1.49	0
chr2R	23725342	23726341	FBgn0266864	CR45325	+	0	0	43629.1	18197	1.49	0
chr3L	3396755	3397754	NA	NA	+	0	0	14040	5841	1.49	8.25e-250
chr3L	20398150	20399149	FBgn0028978	CG5408	+	0	0	25745.4	10712	1.49	1.86e-237
chr3L	20447692	20448953	FBgn0083120	CR42454	+	0	0	56651	23643	1.49	3.61e-206
chr2R	22537589	22538588	FBgn0003175	CG4444	+	0	0	8338.7	3461	1.48	0
chr2R	24767677	24768676	FBgn0040666	CG12848	+	0	0	10622.3	4412	1.48	0
chr3L	4170660	4171659	FBgn0261274	CG1333	+	0	0	9068	3763	1.48	0
chr3L	11169690	11170730	FBgn0264721	CR43989	+	0	0	17853.1	7393	1.48	0
chr2R	21192938	21193937	FBgn0034602	CG15658	+	0	0	3894.7	1607	1.48	2.4e-181
chr3L	14555031	14556030	FBgn0266117	CR44843	+	0	0	8138.8	3364	1.48	2.58e-118
chr3L	19173261	19174260	FBgn0016797	CG9739	+	0	0	2421.4	1001	1.47	0
chrX	16413979	16414978	FBgn0030748	CG4394	+	0	0	27909.4	11541	1.47	0
chr2R	24677191	24678190	FBgn0035049	CG4859	+	0	0	11028.5	4542	1.46	0
chr3L	819691	820690	FBgn0264475	CR43883	+	0	0	16797	6918	1.46	0
chr3L	3178903	3179902	FBgn0035410	CG14964	+	0	0	13410.6	5519	1.46	0
chrX	2461507	2462506	FBgn0040388	CG32796	+	0	0	7988.6	3287	1.46	1.68e-258
chrX	18870768	18871767	FBgn0085430	CG34401	+	0	0	37033.6	15242	1.46	2.61e-244
chr2L	2146823	2147822	FBgn0031392	CG7263	+	0	0	15292.3	6255	1.46	6.83e-191
chr2L	5987475	5988474	FBgn0001941	CG9078	+	0	0	33787.2	13850	1.45	0
chr2L	6341086	6342085	FBgn0015623	CG11567	+	0	0	22057.1	9039	1.45	0
chr2L	9012340	9013339	FBgn0032089	CG9573	+	0	0	18214.8	7453	1.45	0
chr2R	22828892	22829891	FBgn0034782	CG12490	+	0	0	10628.8	4360	1.45	6.37e-291
chr3L	19168770	19169769	FBgn0016797	CG9739	+	0	0	10887	4469	1.45	1.89e-209
chr3R	9054967	9055966	FBgn0037659	CG11033	+	0	0	48022.7	19653	1.45	1.92e-149
chr3R	15268401	15269400	FBgn0263740	CG43665	+	0	0	13002.2	5318	1.44	0
chrX	13813442	13814441	FBgn0030529	CG10997	+	0	0	30282	12403	1.44	0
chrX	18082560	18083559	FBgn0030890	CG7536	+	0	0	6510.2	2673	1.44	0
chr2R	18776377	18777376	FBgn0034390	CG15093	+	0	0	10919.9	4456	1.44	4.45e-305
chr2R	21633365	21634364	FBgn0034643	CG10321	+	0	0	15114.4	6163	1.43	0
chr3L	633011	634010	FBgn0263039	NA	+	0	0	17341.8	7074	1.43	0
chr3L	4221896	4222895	FBgn0263110	CG43367	+	0	0	9236.5	3765	1.43	0
chr3R	14723064	14724063	FBgn0262127	CG33967	+	0	0	12840.2	5248	1.43	1.85e-290
chrX	8683463	8684462	FBgn0030056	CG11284	+	0	0	9874.7	4033	1.43	5.54e-234
chr2L	6045875	6046874	FBgn0085208	CG34179	+	0	0	17003.4	6913	1.43	1.21e-204
chr3L	875312	876311	FBgn0052479	CG32479	+	0	0	14664.4	5961	1.43	1.08e-180
chr3L	5800888	5801887	FBgn0035638	CG10541	+	0	0	12264.8	4994	1.42	0
chrX	1577709	1578708	FBgn0283451	CG11491	+	0	0	7397.8	3000	1.42	0
chr3L	3051790	3052789	FBgn0052485	CG32485	+	0	0	9122	3678	1.42	3.07e-216
chr3R	5516929	5518159	FBgn0010399	CG2902	+	0	0	26096.2	10538	1.42	9.42e-131
chr2R	6124980	6125979	FBgn0000546	CG1765	+	0	0	27805.8	11123	1.42	3.17e-122
chr2R	22667438	22668437	FBgn0050273	CG30273	+	0	0	18225	7283	1.42	2.04e-115
chr3L	1204649	1205648	FBgn0063667	CG32335	+	0	0	7039.7	2811	1.42	2.32e-110
chr3L	3349845	3350844	FBgn0004167	CG12008	+	0	0	17324.3	6929	1.41	0
chr3R	16305161	16306160	FBgn0038412	CG6898	+	0	0	42230.9	16886	1.41	0
chrX	16318728	16319727	FBgn0004432	CG9916	+	0	0	19021.5	7596	1.41	0
chrX	17626715	17627714	FBgn0030853	CG5703	+	0	0	12526.6	5017	1.41	0
chr2R	10129914	10130913	FBgn0284235	CG46319	+	0	0	3446.2	1372	1.41	3.77e-231
chr2R	14481895	14482894	FBgn0267824	CG46146	+	0	0	23796.6	9477	1.41	4.56e-181
chr3L	3411258	3412257	FBgn0262260	CR42967	+	0	0	14281.4	5698	1.41	8.19e-163
chr3R	16049042	16050041	FBgn0038395	CG10407	+	0	0	18512.4	7381	1.4	2.16e-250
chrX	2222014	2223013	FBgn0029606	CG14052	+	0	0	49945.3	19897	1.4	3.74e-123
chr2R	17406188	17407187	FBgn0034210	CG6568	+	0	0	54882.3	21808	1.4	1.68e-97
chr3L	8096320	8097319	FBgn0035833	CG7565	+	0	0	9782.8	3871	1.39	0
chr3R	30201727	30202726	FBgn0039756	CG9743	+	0	0	22850.6	9037	1.39	0
chr2R	8604454	8605453	FBgn0267792	CG8643	+	0	0	36611.3	14440	1.39	0
chr3R	11967978	11968977	FBgn0037970	CG12201	+	0	0	39827	15669	1.39	3.24e-260
chr3R	22633056	22634055	FBgn0020278	CG5248	+	0	0	10253.2	4032	1.39	1.47e-233
chrX	12666200	12667199	FBgn0011837	CG4070	+	0	0	12230.5	4822	1.39	4.62e-220
chr2L	19155809	19156808	FBgn0010300	CG10719	+	0	0	47680.7	18710	1.39	7.58e-200
chr3R	24629536	24630535	FBgn0046685	CG31127	+	0	0	29678.1	11620	1.39	1.51e-109
chrX	6778966	6779965	FBgn0003390	CG3135	+	0	0	5845	2288	1.39	5.23e-315
chr2R	22389886	22390885	FBgn0034723	CG13506	+	0	0	13460.9	5256	1.38	7.21e-280
chr3R	31726054	31727053	FBgn0003870	CG1856	+	0	0	5911.4	2310	1.38	3.49e-257
chr2R	13978330	13979329	FBgn0033889	CG6701	+	0	0	7491.9	2911	1.38	3.92e-187
chr3L	1324739	1325955	FBgn0011361	CG9160	+	0	0	12234.2	4765	1.38	5.4e-160
chr2L	323370	324369	FBgn0031248	CG11912	+	0	0	13742.5	5331	1.38	1.28e-111
chr2L	9705541	9706540	FBgn0051710	CG31710	+	0	0	13397.5	5170	1.38	1.05e-319
chr3L	20385834	20386833	FBgn0027565	CG5498	+	0	0	27805.8	10751	1.37	0
chr3R	5653638	5654637	FBgn0264902	CR44093	+	0	0	13193.2	5080	1.37	1.93e-259
chrX	7295834	7296833	FBgn0029941	CG1677	+	0	0	6928.1	2664	1.37	2.35e-248
chrX	16405954	16406953	FBgn0030746	CG9981	+	0	0	11640.5	4482	1.37	1.75e-237
chr3L	6947902	6948901	FBgn0035719	CG14821	+	0	0	19528.4	7484	1.37	1.74e-223
chr2R	19394983	19395982	FBgn0267587	CR45925	+	0	0	25236.3	9622	1.37	1.09e-91
chr3L	18011362	18012361	FBgn0000568	CG8127	+	0	0	7449.6	2848	1.36	4.88e-228
chr3L	19618528	19619527	FBgn0260655	CG8793	+	0	0	7817.2	2982	1.36	2.47e-186
chrX	13390555	13391554	FBgn0265831	CR44620	+	0	0	6957.3	2650	1.36	5.82e-105
chr2L	3770835	3771834	FBgn0263843	CR43704	+	0	0	37911.7	14348	1.36	7.73e-98
chr2R	17543591	17544590	FBgn0028382	CG4886	+	0	0	31925.9	12103	1.36	2.62e-86
chr3L	11352857	11353856	FBgn0266786	CR45251	+	0	0	22324.7	8461	1.36	2.77e-313
chr3R	9528206	9529205	FBgn0000244	CG9379	+	0	0	5236	1987	1.35	1.58e-266
chr3R	22596204	22597203	FBgn0051158	CG31158	+	0	0	27283.6	10319	1.35	7.51e-217
chr3L	9630616	9631615	FBgn0036019	CG14176	+	0	0	3970.6	1501	1.35	1.71e-149
chr3L	13862675	13863674	FBgn0036381	CG8745	+	0	0	11210.9	4233	1.35	1.99e-35
chr3R	11235086	11236085	FBgn0051441	CG31441	+	0	0	11514.3	4340	1.35	3.53e-316
chr3R	8939030	8940029	FBgn0037643	CG11963	+	0	0	13927.7	5239	1.34	0
chr3L	8691471	8692470	FBgn0265719	CR44526	+	0	0	86642.6	32477	1.34	0
chr3L	13232441	13233440	FBgn0023095	CG11282	+	0	0	18282.7	6843	1.34	0
chr3R	15341945	15342944	FBgn0038321	CG6218	+	0	0	6336.6	2371	1.34	1.61e-283
chr2R	19137159	19138158	FBgn0000578	CG15112	+	0	0	14567.3	5441	1.34	7.82e-229
chr2R	22591508	22592507	FBgn0034739	CG3927	+	0	0	23235.7	8684	1.34	2.74e-185
chr3R	10862496	10863495	FBgn0037845	CG14694	+	0	0	37126.2	13871	1.34	6.47e-129
chr2L	11045195	11046194	FBgn0032330	CG31868	+	0	0	9406.5	3497	1.33	1.75e-232
chr2L	15478070	15479069	FBgn0003448	CG3956	+	0	0	3085.2	1148	1.33	2e-182
chrX	19497119	19498118	FBgn0027621	CG3400	+	0	0	19542.3	7254	1.33	1.12e-180
chr2L	72349	73348	FBgn0031214	CG11374	+	0	0	46267.9	17162	1.33	3.23e-134
chr2R	12951785	12952784	FBgn0265185	CG44250	+	0	0	6473	2394	1.33	4.11e-84
chr3R	16981021	16982020	FBgn0015008	CG8953	+	0	0	9386	3475	1.32	0
chr3R	24620820	24621819	FBgn0263490	CG34100	+	0	0	21044	7752	1.32	7.2e-197
chr2L	6785690	6786689	FBgn0015776	CG9258	+	0	0	43204.6	15877	1.32	2.84e-185
chr3L	20784766	20785869	FBgn0037021	CG11399	+	0	0	92034	33857	1.32	1.09e-176
chr3R	18279844	18280843	FBgn0038597	CG8064	+	0	0	14119.5	5200	1.32	8.4e-173
chr3R	31062829	31063828	FBgn0002413	CG2048	+	0	0	24978.1	9178	1.32	2.08e-169
chrX	1229165	1230164	FBgn0261444	CG3638	+	0	0	7859.5	2891	1.32	8.99e-120
chrX	17296416	17297415	FBgn0030838	CG5445	+	0	0	19319.1	7107	1.32	3.97e-38
chr2R	8948342	8949341	FBgn0027607	CG8230	+	0	0	49628	18200	1.32	4.94e-324
chr3R	28857124	28858123	FBgn0264324	CG31048	+	0	0	30635	11164	1.31	3.43e-195
chr3R	26009348	26010347	FBgn0002578	CG8342	+	0	0	8782.1	3199	1.31	1.29e-127
chrX	13403358	13404357	FBgn0030484	CG1681	+	0	0	10308.7	3755	1.31	5.27e-95
chr3R	12360544	12361543	FBgn0038016	CG10042	+	0	0	4939.2	1786	1.3	3.46e-299
chr2L	19410300	19411299	FBgn0041789	CG31794	+	0	0	20773.4	7438	1.3	7.79e-272
chr2R	16832962	16833961	FBgn0263659	CR43650	+	0	0	9559.6	3401	1.3	4.52e-220
chr3L	7911340	7912339	FBgn0052368	CG32368	+	0	0	19254.2	6861	1.3	2.89e-196
chr2L	7047004	7048003	FBgn0262872	CG43227	+	0	0	10827.2	3843	1.3	1.05e-179
chr3L	750043	751042	FBgn0035160	CG13897	+	0	0	27878.8	9867	1.3	2.12e-159
chrX	13814819	13815818	FBgn0030529	CG10997	+	0	0	14956.1	5267	1.3	1.33e-135
chr2R	23932322	23933321	FBgn0263006	CG3725	+	0	0	11947.5	4195	1.3	7.38e-132
chr3L	9372215	9373214	FBgn0001229	CG4190	+	0	0	9102.3	3192	1.3	2.21e-129
chr3L	15234021	15235020	FBgn0029114	CG6890	+	0	0	13703.1	4802	1.3	6.81e-59
chr3R	23729603	23730602	FBgn0065098	CR33682	+	0	0	18326.4	6421	1.29	0
chr3R	29287247	29288246	NA	NA	+	0	0	8747.1	3053	1.29	0
chrX	19500640	19501639	FBgn0027621	CG3400	+	0	0	9488.9	3306	1.29	7.37e-160
chrX	21070110	21071109	FBgn0031150	CG32513	+	0	0	14608.2	5093	1.29	2.32e-147
chr3L	12490344	12491343	FBgn0036288	CG10660	+	0	0	15433.8	5364	1.29	3.71e-131
chr2R	9856916	9857915	FBgn0027580	CG1516	+	0	0	13626.5	4720	1.29	6.62e-130
chr3R	23938544	23939543	FBgn0001098	CG5320	+	0	0	15344.8	5317	1.29	1.18e-98
chr3L	17950030	17951029	FBgn0000568	CG8127	+	0	0	18786.6	6439	1.29	2.72e-66
chr3L	11777593	11778592	FBgn0262291	CR42998	+	0	0	20108.2	6803	1.29	4.94e-324
chr3R	21071432	21072431	FBgn0038851	CG5737	+	0	0	17492.8	5900	1.28	1.13e-210
chr3L	16484987	16485986	FBgn0004569	CG4531	+	0	0	12460.3	4193	1.28	8.92e-160
chrX	599118	600117	FBgn0025633	CG13366	+	0	0	27918.1	9413	1.28	1.28e-104
chr3R	6644077	6645076	FBgn0010355	CG17603	+	0	0	44649.5	14834	1.28	3.23e-85
chr3R	19250661	19251660	FBgn0038694	CG5217	+	0	0	14750.4	4905	1.28	2.28e-84
chr3L	4226097	4227096	FBgn0052252	CR32252	+	0	0	4555.5	1496	1.28	3.11e-43
chr3R	16205886	16206885	FBgn0267200	CR45640	+	0	0	6435.1	2112	1.27	1.04e-250
chr2L	18995384	18996383	FBgn0046302	CG10650	+	0	0	6799	2191	1.27	6.92e-122
chr3R	22450919	22451918	FBgn0085405	CG34376	+	0	0	5409.6	1740	1.27	7.27e-91
chr2L	7789929	7790928	FBgn0266072	CR44825	+	0	0	17588.3	5646	1.26	0
chr3L	10682838	10683837	FBgn0010762	CG32067	+	0	0	64563.7	20582	1.26	4.76e-251
chr3R	17007591	17008590	FBgn0038466	CG8907	+	0	0	6268.1	1968	1.26	2.53e-113
chrX	15592631	15593630	FBgn0030662	CG9220	+	0	0	21546.5	6777	1.26	4.82e-110
chrX	6774795	6775794	FBgn0003390	CG3135	+	0	0	25827.8	8003	1.26	5.59e-103
chr3L	20197293	20198292	FBgn0262022	CG42833	+	0	0	20424	6305	1.25	6.77e-242
chrX	10581722	10582721	FBgn0085443	CG34414	+	0	0	6502.2	1991	1.25	2.38e-225
chr3R	16446688	16447687	FBgn0038428	CG14894	+	0	0	32730.4	9977	1.25	5.86e-178
chr2L	9784751	9785750	FBgn0032147	CG4026	+	0	0	14702.3	4449	1.25	7.69e-143
chrX	580265	581264	FBgn0261930	CG6172	+	0	0	54973.5	16580	1.25	1.1e-130
chr3R	21740363	21741362	FBgn0261060	CG42608	+	0	0	6637.8	1974	1.25	9.41e-123
chrX	6551079	6552078	FBgn0085446	CG34417	+	0	0	26806.6	7824	1.25	7.97e-97
chr3R	9392990	9393989	FBgn0000723	CG8874	+	0	0	8332.8	2420	1.24	0
chr3R	14568008	14569007	FBgn0051313	CG31313	+	0	0	12930.7	3738	1.24	3.55e-270
chr3L	15235309	15236308	FBgn0029114	CG6890	+	0	0	10987.7	3145	1.24	3.93e-101
chr2R	9430687	9431686	FBgn0017558	CG8808	+	0	0	28778	8206	1.24	2.69e-82
chr2L	8734383	8735382	FBgn0003209	CG12437	+	0	0	17631.4	4973	1.24	5.73e-79
chrX	2043600	2044599	FBgn0003964	CG4380	+	0	0	9571.3	2683	1.23	2.89e-153
chr3L	1726149	1727148	FBgn0027594	CG2086	+	0	0	15158.1	4237	1.23	3.84e-83
chr3R	19152620	19153619	FBgn0002962	CG5637	+	0	0	6995.2	1924	1.23	2.62e-63
chr2R	24607144	24608143	FBgn0035039	CG3608	+	0	0	122849	33657	1.23	7.65e-63
chr3L	16955522	16956521	FBgn0010352	CG11661	+	0	0	48174.4	13208	1.23	1.43e-61
chrX	1050780	1051779	FBgn0040398	CG14629	+	0	0	53686.1	14606	1.23	1.18e-55
chr3R	24348562	24349561	FBgn0039187	CG6454	+	0	0	8622.4	2336	1.22	7.66e-222
chr2L	15629702	15630701	FBgn0028945	CG7631	+	0	0	7400	1917	1.22	2.96e-153
chr2L	18829899	18830898	FBgn0015808	CG17320	+	0	0	6890.2	1783	1.22	1.72e-60
chr3R	10209841	10210840	FBgn0025879	CG6281	+	0	0	14843	3837	1.22	5.55e-51
chr3R	25328622	25329621	FBgn0039328	CG10675	+	0	0	12420.9	3113	1.22	1.03e-35
chr2L	6342737	6343736	FBgn0015623	CG11567	+	0	0	13512	3334	1.21	3.32e-298
chr3L	15527520	15528519	FBgn0053986	CG33986	+	0	0	8254.1	2026	1.21	2.97e-147
chr3L	3044263	3045262	FBgn0052484	CG32484	+	0	0	8955.7	2100	1.21	2.26e-78
chr3L	16698535	16699534	FBgn0063485	CG3849	+	0	0	12358.9	2858	1.21	1.59e-77
chr3R	24894530	24895529	FBgn0051121	CG31121	+	0	0	5621.8	1199	1.21	6.01e-48
chr3L	17756910	17757909	FBgn0052181	CG32181	+	0	0	16788.2	3482	1.21	1.72e-37
chr3L	17000311	17001310	FBgn0036684	CG3764	+	0	0	19667	3055	1.2	1.34e-134
chr3L	1320670	1321669	FBgn0010246	CG9155	+	0	0	5698.4	834	1.2	3.76e-64

## Sheet: enriched in esg-dam (Rad21-)
chrom	start	end	FBID	symbol	strand	score	focus ratio/other	Total Tags	Background Tags	Fold Change vs. Background	p-value
chrX	7698607	7699606	FBgn0029504	CG12690	+	0	0	7178	8.8	820.13	0
chr2R	18330010	18331009	FBgn0285917	CG5580	+	0	0	6799	11.7	582.62	0
chrX	2288941	2289940	FBgn0023526	CG2865	+	0	0	3220	6.6	490.54	0
chrX	278352	279351	FBgn0005427	CG3114	+	0	0	8099	19.7	411.27	0
chr2L	6454691	6455690	FBgn0031815	CG9526	+	0	0	11321	29.2	388.05	0
chr2L	10557882	10558881	FBgn0051721	CG31721	+	0	0	2683	7.3	367.86	0
chrX	9581142	9582141	FBgn0259741	CG42395	+	0	0	13857	41.6	333.32	0
chrX	3371065	3372064	FBgn0266350	CR44999	+	0	0	11958	37.2	321.48	0
chr2L	9744539	9745538	FBgn0028704	CG18660	+	0	0	17720	56.2	315.53	0
chr2L	5145389	5146388	FBgn0261836	CG42768	+	0	0	7907	28.4	277.98	0
chr2R	21713600	21714599	FBgn0265962	CR44749	+	0	0	17182	68.6	250.62	0
chrX	12752208	12753207	FBgn0265830	CR44619	+	0	0	11490	57.6	199.41	0
chrX	14808774	14809773	FBgn0003301	CG9533	+	0	0	6159	33.6	183.58	0
chr3R	16278916	16279915	FBgn0250823	CG6963	+	0	0	5130	29.9	171.55	0
chr3L	10354921	10355920	FBgn0267668	CR46006	+	0	0	5243	34.3	152.95	0
chr3L	21413884	21414883	FBgn0261258	CG6014	+	0	0	7108	52.5	135.36	0
chrX	19296830	19297829	FBgn0031011	CG8034	+	0	0	6437	51.8	124.3	0
chr2R	10769502	10770501	FBgn0053144	CG33144	+	0	0	6225	59.8	104.09	0
chrX	15869841	15870840	FBgn0001092	CG8893	+	0	0	10902	140.8	77.45	0
chr3R	10387752	10388751	FBgn0259938	CG17100	+	0	0	13633	187.4	72.73	0
chrX	13567966	13568965	FBgn0284227	CG46311	+	0	0	14546	204.2	71.23	0
chrX	10731775	10732774	FBgn0052676	CG32676	+	0	0	5518	81.7	67.55	0
chr2R	14085584	14086583	FBgn0259183	CG42287	+	0	0	7804	134.2	58.15	0
chr3L	11245874	11246873	FBgn0265924	CR44713	+	0	0	22598	409.9	55.13	0
chrX	2430642	2431641	FBgn0001150	CG7952	+	0	0	10136	194	52.25	0
chr2L	12504908	12505907	FBgn0259176	CG42281	+	0	0	6269	151	41.52	0
chr2L	16268839	16269838	FBgn0001994	CG7664	+	0	0	16205	415	39.05	0
chrX	17120462	17121461	FBgn0260748	CG5004	+	0	0	12652	327.5	38.63	0
chr3R	26211715	26212714	FBgn0265379	CR44320	+	0	0	3559	94.1	37.83	0
chrX	2536189	2537188	FBgn0284408	CG33950	+	0	0	6690	187.4	35.69	0
chr3R	27573231	27574230	FBgn0027492	CG5643	+	0	0	4294	124	34.63	0
chr3R	9883593	9884592	FBgn0267336	CG34360	+	0	0	9710	290.3	33.45	0
chr2R	14008027	14009026	FBgn0002643	CG8118	+	0	0	5315	159	33.43	0
chr3R	18197767	18198766	FBgn0011481	CG7187	+	0	0	10183	307.8	33.08	0
chrX	19847962	19848961	FBgn0031078	CG11943	+	0	0	7372	246.5	29.9	0
chrM	8159	9158	NA	NA	+	0	0	18901	633.1	29.86	0
chr3L	17511581	17512580	FBgn0036733	CG6322	+	0	0	34087	1186.7	28.73	0
chr3R	30356001	30357000	FBgn0010113	CG15532	+	0	0	5320	189.6	28.05	0
chr2R	13927986	13928985	FBgn0013733	CG18076	+	0	0	8960	322.4	27.79	0
chr3R	21608136	21609135	FBgn0283499	CG18402	+	0	0	8943	355.9	25.13	0
chr2R	22084875	22085874	FBgn0034691	CG6562	+	0	0	3672	147.3	24.92	0
chr3R	24653606	24654605	FBgn0039215	CG6695	+	0	0	8280	349.4	23.7	0
chrX	12755930	12756929	NA	NA	+	0	0	4603	195.5	23.55	0
chr2R	22119582	22120581	FBgn0002715	CG5303	+	0	0	3842	164.8	23.31	0
chr3R	23220678	23221677	FBgn0262975	CG43286	+	0	0	8776	383.6	22.88	0
chrX	2321270	2322269	FBgn0040391	CG2854	+	0	0	6505	285.9	22.75	0
chr2L	19186987	19187986	FBgn0267726	CG46059	+	0	0	64795	2896.3	22.37	0
chr2R	17842546	17843545	FBgn0041585	CG11430	+	0	0	3570	165.6	21.56	0
chr3L	14780383	14781382	FBgn0036449	CG5295	+	0	0	7705	358.1	21.52	0
chr2L	20311030	20312029	FBgn0003475	CG10076	+	0	0	3915	188.2	20.81	0
chr2L	14384139	14385138	FBgn0020258	CG3478	+	0	0	9144	439.8	20.79	0
chr3R	18396137	18397136	FBgn0028670	CG18617	+	0	0	12608	623.6	20.22	0
chr2L	5874520	5875519	FBgn0031745	CG8965	+	0	0	6229	317.3	19.63	0
chr3R	30281806	30282805	FBgn0010113	CG15532	+	0	0	6568	339.9	19.32	0
chr2L	9691005	9692004	FBgn0000273	CG4379	+	0	0	9705	513.5	18.9	0
chr2L	5888613	5889612	FBgn0265788	CR44577	+	0	0	7124	388.7	18.33	0
chr2L	3061624	3062623	FBgn0283427	CG3523	+	0	0	13112	737.4	17.78	0
chrX	4939098	4940097	FBgn0266000	CG44774	+	0	0	4389	248	17.7	0
chr3L	4102288	4103287	FBgn0028484	CG14992	+	0	0	11184	635.3	17.61	0
chr3L	5783173	5784172	FBgn0044419	CG33718	+	0	0	2401	139.3	17.24	0
chr2L	14021541	14022540	FBgn0266892	CR45352	+	0	0	9477	555	17.07	0
chr2R	10324293	10325292	FBgn0250822	CG34222	+	0	0	2987	183.1	16.32	0
chrX	3294068	3295067	FBgn0000479	CG32498	+	0	0	12671	801.6	15.81	0
chr2R	16163019	16164018	FBgn0034083	CG8434	+	0	0	7167	460.2	15.57	0
chrX	13226257	13227256	FBgn0004456	CG1771	+	0	0	12391	803	15.43	0
chrX	15525379	15526378	FBgn0022710	CG9210	+	0	0	8551	554.3	15.43	0
chr2R	16589844	16590843	FBgn0034141	CG8311	+	0	0	38582	2544	15.17	0
chr3R	26569821	26570820	FBgn0263289	CG43398	+	0	0	7301	486.5	15.01	0
chrX	13277625	13278624	FBgn0041210	CG1770	+	0	0	16219	1174.3	13.81	0
chrX	655091	656090	FBgn0025637	CG16983	+	0	0	26195	1916	13.67	0
chrX	3447109	3448108	FBgn0029657	CG12535	+	0	0	8308	614.1	13.53	0
chr3R	23411305	23412304	FBgn0039078	CG4374	+	0	0	10920	820.5	13.31	0
chrX	2292970	2293969	FBgn0023526	CG2865	+	0	0	5451	416.5	13.09	0
chrX	21313304	21314303	FBgn0020369	CG1489	+	0	0	66658	5096.7	13.08	0
chr2R	19205397	19206396	FBgn0263395	CG7097	+	0	0	6644	508.4	13.07	0
chrX	1666427	1667426	FBgn0000482	CG3093	+	0	0	56791	4425.7	12.83	0
chr2R	13953067	13954066	FBgn0050481	CG30481	+	0	0	7365	583.5	12.62	0
chrX	8200407	8201406	FBgn0261873	CG32717	+	0	0	15878	1278.6	12.42	0
chrX	62239	63238	NA	NA	+	0	0	5658	481.4	11.75	0
chr3R	10242147	10243146	FBgn0261928	CG42795	+	0	0	6896	590.8	11.67	0
chr3L	18821195	18822194	FBgn0036814	CG14073	+	0	0	4640	406.2	11.42	0
chr2R	22631512	22632511	FBgn0053143	CG33143	+	0	0	5395	487.2	11.07	0
chr3L	16409223	16410222	FBgn0028399	CG4672	+	0	0	5834	539	10.82	0
chrX	17147948	17148947	FBgn0083041	CR34600	+	0	0	8177	776	10.54	0
chr2R	9880849	9881848	FBgn0033460	CG1472	+	0	0	3938	374.9	10.5	0
chr2R	17597631	17598630	FBgn0029006	CG4943	+	0	0	24545	2363.1	10.39	0
chrX	57791	58790	NA	NA	+	0	0	3966	384.4	10.32	0
chr2R	18767355	18768354	FBgn0050229	CR30229	+	0	0	5163	507.6	10.17	0
chr3R	29488498	29489497	FBgn0039666	CG11501	+	0	0	3779	374.2	10.1	0
chr2L	19064099	19065098	FBgn0032752	CG10702	+	0	0	52634	5281.2	9.97	0
chr3L	14756043	14757042	FBgn0260233	CG42507	+	0	0	8336	837.3	9.96	0
chr3L	1585223	1586222	FBgn0035237	CG13917	+	0	0	7634	785.5	9.72	0
chr2R	24642819	24643818	FBgn0035043	CG4781	+	0	0	13999	1442.7	9.7	0
chr2L	10478292	10479291	FBgn0032256	CG6187	+	0	0	7189	749	9.6	0
chrX	19166566	19167565	FBgn0261461	CG42274	+	0	0	7370	774.6	9.51	0
chr3R	9592173	9593172	FBgn0037720	CG8312	+	0	0	5511	625.8	8.81	0
chrX	3746428	3747427	FBgn0283657	CG34412	+	0	0	5052	598.1	8.45	0
chrX	18970769	18971768	FBgn0264090	CG43759	+	0	0	2800	336.2	8.33	0
chr3R	20544963	20545962	FBgn0016917	CG4257	+	0	0	11803	1450.7	8.14	0
chrX	1828602	1829601	FBgn0283741	CG42666	+	0	0	1810	222.5	8.14	0
chr2L	328861	329860	FBgn0004611	CG4574	+	0	0	17600	2231.8	7.89	0
chr2R	18529159	18530158	FBgn0034356	CG10924	+	0	0	5552	714	7.78	0
chr2L	4372887	4373886	FBgn0266903	CR45363	+	0	0	16662	2145.8	7.77	0
chrX	10368781	10369780	FBgn0028331	CG2221	+	0	0	10818	1417.1	7.63	0
chr2L	5797978	5798977	FBgn0031738	CG9171	+	0	0	5046	675.4	7.47	0
chrX	3186481	3187480	FBgn0000479	CG32498	+	0	0	4895	661.5	7.4	0
chr3L	5186580	5187579	FBgn0052423	CG32423	+	0	0	15016	2033.4	7.38	0
chr3R	8844282	8845281	FBgn0262614	CG43140	+	0	0	8546	1177.2	7.26	0
chr3R	31222988	31223987	FBgn0263544	CR43529	+	0	0	9778	1375.6	7.11	0
chr3L	8833595	8834594	FBgn0052026	CG32026	+	0	0	10412	1560.1	6.67	0
chr2R	11889930	11890929	FBgn0033663	CG8983	+	0	0	16873	2560	6.59	0
chr2L	12467146	12468145	FBgn0259176	CG42281	+	0	0	3667	560.9	6.54	0
chr3L	446699	447698	FBgn0001316	CG17046	+	0	0	7671	1198.3	6.4	0
chr3L	4354587	4355586	FBgn0035533	CG15015	+	0	0	7893	1258.1	6.27	0
chr3R	11648696	11649695	FBgn0037926	CG10535	+	0	0	17667	2823.3	6.26	0
chr3R	22669764	22670763	FBgn0266418	CG45058	+	0	0	7546	1243.5	6.07	0
chr3R	6434429	6435428	FBgn0264495	CG42803	+	0	0	8253	1401.1	5.89	0
chr3R	26549016	26550015	FBgn0263289	CG43398	+	0	0	8627	1467.5	5.88	0
chr3R	31071794	31072793	FBgn0024288	CG15552	+	0	0	3809	650.6	5.85	0
chr3R	17713596	17714595	FBgn0261885	CG7467	+	0	0	9737	1671.7	5.82	0
chr2R	22135532	22136531	FBgn0000008	CG6741	+	0	0	7583	1307	5.8	0
chr3L	17916964	17917963	FBgn0036772	CG5290	+	0	0	5050	878.9	5.75	0
chr3R	30330074	30331073	FBgn0010113	CG15532	+	0	0	4984	866.5	5.75	0
chr3L	14272713	14273712	FBgn0001085	CG17697	+	0	0	8141	1417.1	5.74	0
chr3R	12086473	12087472	FBgn0037989	CG14741	+	0	0	7184	1304.8	5.51	0
chr3L	9054863	9055862	FBgn0000116	CG32031	+	0	0	8373	1565.2	5.35	0
chr2R	24678739	24679738	FBgn0035049	CG4859	+	0	0	5822	1091.8	5.33	0
chrX	13087724	13088723	FBgn0261524	CG12244	+	0	0	5652	1067	5.3	0
chr3L	1728893	1729892	FBgn0027594	CG2086	+	0	0	9068	1726.4	5.25	0
chr2L	5867226	5868225	FBgn0031745	CG8965	+	0	0	4419	850.4	5.2	0
chr2R	10022733	10023732	FBgn0033473	CG12128	+	0	0	4767	960.6	4.96	0
chr3L	129551	130550	FBgn0266950	CR45401	+	0	0	10889	2261.7	4.81	0
chr3L	18889881	18890880	FBgn0036821	CG3961	+	0	0	9110	1953.9	4.66	0
chrX	10087438	10088437	FBgn0030178	CG2974	+	0	0	9729	2098.3	4.64	0
chrX	12661155	12662154	FBgn0011837	CG4070	+	0	0	7218	1554.2	4.64	0
chrX	19642686	19643685	FBgn0031048	CG12237	+	0	0	4065	878.9	4.63	0
chr2R	18689120	18690119	FBgn0265625	CG44433	+	0	0	13057	2829.9	4.61	0
chrX	11440168	11441167	FBgn0030300	CG1747	+	0	0	9258	2007.9	4.61	0
chr2R	10871482	10872481	FBgn0050015	CG30015	+	0	0	20120	4369.5	4.6	0
chr2L	492670	493669	FBgn0267991	CR46258	+	0	0	9648	2105.6	4.58	0
chr3R	11948758	11949757	FBgn0051211	CG31211	+	0	0	20626	4536.6	4.55	0
chrX	8520864	8521863	FBgn0264975	CG1634	+	0	0	31193	6893.1	4.53	0
chr2L	18622429	18623428	FBgn0032694	CG15162	+	0	0	6134	1373.4	4.47	0
chr2R	21287994	21288993	FBgn0016726	CG10071	+	0	0	76486	17267.4	4.43	0
chr2L	11526092	11527091	FBgn0262683	CG43153	+	0	0	17046	3939.2	4.33	0
chr3R	5322834	5323833	FBgn0013576	CG32464	+	0	0	9130	2106.4	4.33	0
chr2L	4997513	4998512	FBgn0053113	CG33113	+	0	0	9715	2266.1	4.29	0
chr3L	2798119	2799118	FBgn0263392	CG43444	+	0	0	6535	1525.1	4.29	0
chr2L	1585929	1586928	FBgn0261509	CG14351	+	0	0	1606	374.9	4.28	0
chr2R	10558615	10559614	FBgn0263102	CG2368	+	0	0	8353	1949.6	4.28	0
chrX	7004752	7005751	NA	NA	+	0	0	19360	4535.1	4.27	0
chrX	1964794	1965793	FBgn0264562	CG43934	+	0	0	3453	816.1	4.23	0
chrX	13993408	13994407	FBgn0267033	CG45477	+	0	0	9176	2180	4.21	0
chr2L	161754	162753	FBgn0053635	CG33635	+	0	0	6887	1651.3	4.17	0
chr2R	21480396	21481395	FBgn0010415	CG10497	+	0	0	1376	330.4	4.16	0
chr3L	17534585	17535584	FBgn0259174	CG42279	+	0	0	13806	3411.9	4.05	0
chr2L	2858111	2859110	FBgn0031474	CG2991	+	0	0	9215	2309.1	3.99	0
chr3R	14649449	14650448	FBgn0086686	CG7832	+	0	0	14668	3732.8	3.93	0
chrX	900765	901764	FBgn0264449	CG43867	+	0	0	6153	1567.4	3.93	0
chrX	19364453	19365452	FBgn0031016	CG12199	+	0	0	5365	1373.4	3.91	0
chr4	506984	507983	FBgn0004607	CG1449	+	0	0	7264	1867.9	3.89	0
chr2L	221895	222894	FBgn0265153	CR44222	+	0	0	11232	2918.1	3.85	0
chr2R	15612709	15613708	FBgn0260429	CG42524	+	0	0	11613	3196	3.63	0
chr2R	7047916	7048915	FBgn0033134	CG12840	+	0	0	4663	1291.7	3.61	0
chrX	4563845	4564844	FBgn0052773	CR32773	+	0	0	39784	11045.3	3.6	0
chrX	3675068	3676616	FBgn0023215	CG13316	+	0	0	18203	5085.8	3.58	0
chr2L	3343754	3344753	FBgn0020445	CG3327	+	0	0	5417	1519.2	3.57	0
chr3L	511609	512608	FBgn0001316	CG17046	+	0	0	11911	3355.7	3.55	0
chr2R	6672651	6673650	FBgn0033087	CG3194	+	0	0	8215	2380.6	3.45	0
chr2R	6961605	6962604	FBgn0066292	CG33350	+	0	0	23186	6760.4	3.43	0
chrX	3873397	3874396	FBgn0265575	CG44402	+	0	0	4593	1366.8	3.36	0
chr3R	13685148	13686147	FBgn0038168	CG9591	+	0	0	16590	4989.5	3.32	0
chr2R	11602208	11603207	FBgn0033636	CG10897	+	0	0	4933	1495.2	3.3	0
chrX	10109494	10110493	FBgn0083940	CG34104	+	0	0	3760	1158.2	3.25	0
chr2R	14283329	14284328	FBgn0263397	CG8585	+	0	0	6578	2044.4	3.22	0
chr3L	21889350	21890349	FBgn0264470	CR43878	+	0	0	5393	1673.1	3.22	0
chr3L	6711249	6712248	NA	NA	+	0	0	12549	3929	3.19	0
chr3R	9351419	9352418	FBgn0086053	CR34682	+	0	0	12488	3925.4	3.18	0
chr2L	7525484	7526483	FBgn0264895	CG44086	+	0	0	4336	1371.2	3.16	0
chr2L	19573908	19574907	FBgn0005672	CG10334	+	0	0	22465	7200.2	3.12	0
chrX	2301286	2302285	FBgn0003079	CG2845	+	0	0	7175	2307.7	3.11	0
chr2R	17098934	17099933	FBgn0010226	CG8938	+	0	0	14579	4729.8	3.08	0
chr3L	11274407	11275406	FBgn0265931	CR44720	+	0	0	5234	1707.4	3.07	0
chr2R	16813625	16814624	FBgn0034160	CG5550	+	0	0	6197	2029.8	3.05	0
chr3L	8985600	8986599	FBgn0263199	CG5288	+	0	0	9639	3171.2	3.04	0
chrX	4672025	4673024	FBgn0262699	CG3000	+	0	0	7079	2367.5	2.99	0
chr3L	4107360	4108359	FBgn0028484	CG14992	+	0	0	7460	2549.1	2.93	0
chr2L	19789447	19790446	FBgn0032821	CG10538	+	0	0	4073	1397.4	2.91	0
chrX	800653	801652	FBgn0260855	CG7359	+	0	0	10134	3485.6	2.91	0
chrX	20253425	20254574	FBgn0031098	CG17068	+	0	0	23311	8006.8	2.91	0
chrX	7200033	7201032	FBgn0029939	CG9650	+	0	0	5373	1851.8	2.9	0
chr3R	18243160	18244159	FBgn0020238	CG31196	+	0	0	12703	4400.2	2.89	0
chr3R	17065904	17066903	FBgn0020493	CG5201	+	0	0	11991	4158	2.88	0
chr3R	14712880	14713879	FBgn0262127	CG33967	+	0	0	6005	2121.7	2.83	0
chr2R	10781582	10782581	FBgn0053144	CG33144	+	0	0	8555	3050.2	2.8	0
chr3L	21894591	21895590	FBgn0262737	CG7437	+	0	0	15557	5559.9	2.8	0
chrX	11500950	11501949	FBgn0052666	CG32666	+	0	0	11509	4147.8	2.77	0
chr2R	16381091	16382090	FBgn0266856	CR45317	+	0	0	9546	3478.3	2.74	0
chr2L	17472225	17473224	FBgn0000183	CG6605	+	0	0	5245	1922.6	2.73	0
chr3R	20836032	20837031	FBgn0053094	CG33094	+	0	0	7574	2784.7	2.72	0
chr3L	15534913	15535912	FBgn0262893	CG43248	+	0	0	17913	6613.8	2.71	0
chr3L	8696430	8697429	NA	NA	+	0	0	7777	2884.6	2.7	0
chr3L	21171080	21172079	FBgn0021760	CG32435	+	0	0	7102	2641.7	2.69	0
chr3L	3518354	3519353	FBgn0005640	CG10579	+	0	0	5375	2007.9	2.68	0
chrM	3444	4443	NA	NA	+	0	0	21084	7856.6	2.68	0
chr2L	19951781	19952780	FBgn0263873	CG43720	+	0	0	18173	6832.6	2.66	0
chr2L	16321219	16322218	FBgn0014092	CG4278	+	0	0	9071	3438.9	2.64	0
chr2L	20906571	20907570	FBgn0263996	CG43739	+	0	0	13129	5141.2	2.55	0
chr2L	9133743	9134742	FBgn0052982	CG32982	+	0	0	12413	4929	2.52	0
chr2L	17376905	17377904	FBgn0032633	CG6860	+	0	0	7727	3119.4	2.48	0
chr2L	18458616	18459615	FBgn0263049	CR43344	+	0	0	5675	2284.3	2.48	0
chr2R	11633630	11634629	FBgn0033638	CG9005	+	0	0	10218	4125.9	2.48	0
chrX	15551682	15552681	FBgn0265453	CR44353	+	0	0	8938	3643.1	2.45	0
chr2R	8060005	8061004	FBgn0033252	CG12769	+	0	0	11429	4678.1	2.44	0
chr2R	11204644	11205643	FBgn0003396	CG7734	+	0	0	17161	7074	2.43	0
chr2L	3941851	3942850	FBgn0051774	CG31774	+	0	0	4673	1932.8	2.42	0
chr2R	6506704	6507703	FBgn0086655	CG9397	+	0	0	5250	2187.3	2.4	0
chr2R	12994360	12995359	FBgn0053798	CG33798	+	0	0	2773	1154.6	2.4	0
chrX	1264990	1265989	FBgn0028550	CG11405	+	0	0	11309	4713.8	2.4	0
chr3R	30271508	30272546	NA	NA	+	0	0	8680	3629.3	2.39	0
chrX	17878141	17879140	FBgn0030881	CG12985	+	0	0	35163	14908	2.36	0
chrX	17300412	17301411	FBgn0030838	CG5445	+	0	0	11521	4969.8	2.32	0
chr2L	6085570	6086569	FBgn0266450	CG45074	+	0	0	25124	10935.9	2.3	0
chr3L	12391956	12392955	FBgn0036279	CG4357	+	0	0	4641	2060.4	2.25	0
chr2L	21163891	21164890	FBgn0032924	CG9247	+	0	0	7003	3153.7	2.22	0
chr3L	2756055	2757054	FBgn0052296	CG32296	+	0	0	7092	3215.7	2.21	0
chr2R	7529540	7530539	FBgn0033188	CG1600	+	0	0	12551	5750.9	2.18	0
chr2L	20083393	20084392	FBgn0004374	CG10718	+	0	0	9937	4600	2.16	0
chr3L	3229879	3230878	FBgn0035424	CG11505	+	0	0	14718	6826.7	2.16	0
chr2L	9510335	9511334	FBgn0032120	CG33298	+	0	0	6584	3080.8	2.14	0
chr3L	14004379	14005378	FBgn0036398	CG9007	+	0	0	13155	6137.5	2.14	0
chr3R	9873431	9874430	FBgn0267336	CG34360	+	0	0	7842	3672.3	2.14	0
chr3L	11294712	11295711	FBgn0036152	CG6175	+	0	0	8111	3827.6	2.12	0
chrX	11119029	11120028	FBgn0030266	CG11122	+	0	0	4036	1912.4	2.11	0
chr3R	15963207	15964206	FBgn0038388	CG4287	+	0	0	5513	2746.7	2.01	0
chrX	1375144	1376143	FBgn0024987	CG3056	+	0	0	7376	3683.2	2	0
chrX	8092227	8093226	FBgn0029996	CG2257	+	0	0	15184	7611.5	1.99	0
chr3R	13012089	13013088	FBgn0020496	CG7583	+	0	0	13626	6890.2	1.98	0
chrX	6353436	6354435	FBgn0029868	CG3446	+	0	0	27434	14186.6	1.93	0
chr2L	21308421	21309420	FBgn0000370	CG8669	+	0	0	13883	7273.8	1.91	0
chr2L	2898894	2899893	FBgn0041111	CG8817	+	0	0	6405	3397.3	1.89	0
chrX	12719950	12720949	FBgn0265523	CG4013	+	0	0	10858	5759.7	1.89	0
chrX	17485346	17486345	FBgn0263706	CG43658	+	0	0	14077	7513.1	1.87	0
chr3R	21853525	21854524	FBgn0015229	CG6575	+	0	0	22949	12490.9	1.84	0
chr3L	13226595	13227594	FBgn0023095	CG11282	+	0	0	13476	7413.9	1.82	0
chr3L	786257	787256	NA	NA	+	0	0	16631	9213.2	1.81	0
chr2L	8365504	8366503	FBgn0032029	CG17292	+	0	0	15910	8846.3	1.8	0
chr3R	21199073	21200072	FBgn0264357	CG17299	+	0	0	17182	9581.5	1.79	0
chrX	10364527	10365526	FBgn0028331	CG2221	+	0	0	16546	9416.7	1.76	0
chr2R	23427715	23428714	FBgn0034861	CG9815	+	0	0	9924	5665.6	1.75	0
chr3L	3082014	3083013	FBgn0035397	CG11486	+	0	0	15373	8871.1	1.73	0
chr3L	6962448	6963447	FBgn0035722	CG10075	+	0	0	51255	29767	1.72	0
chr3R	30276646	30277645	FBgn0267782	CR46113	+	0	0	8841	5136.1	1.72	0
chr3R	17705075	17706074	FBgn0261885	CG7467	+	0	0	12964	7583.1	1.71	0
chrX	15044800	15045838	FBgn0030603	CG5541	+	0	0	20752	12164.9	1.71	0
chr2R	14289945	14290944	FBgn0263397	CG8585	+	0	0	16001	9395.5	1.7	0
chr2L	20882697	20883696	FBgn0263996	CG43739	+	0	0	15832	9496.9	1.67	0
chr2R	6629962	6630961	FBgn0262736	CG3161	+	0	0	49678	29764.9	1.67	0
chr2L	9514217	9515216	FBgn0032120	CG33298	+	0	0	25202	15170.5	1.66	0
chr3R	11656263	11657262	FBgn0259227	CG42327	+	0	0	18414	11123.3	1.66	0
chr3L	787565	788564	NA	NA	+	0	0	17515	10702.5	1.64	0
chr3R	10145755	10146754	FBgn0086359	CG3953	+	0	0	8938	5564.2	1.61	0
chrX	13894010	13895009	FBgn0267033	CG45477	+	0	0	7856	4886.7	1.61	0
chr3L	14759337	14760336	FBgn0260233	CG42507	+	0	0	10682	6700.6	1.59	0
chr3L	20517505	20518504	FBgn0037009	CG5104	+	0	0	12254	7710	1.59	0
chr2R	18813203	18814208	FBgn0034394	CG15096	+	0	0	13973	9024.3	1.55	0
chrX	21589288	21590287	NA	NA	+	0	0	15216	9809.8	1.55	0
chr2R	10476483	10477640	FBgn0261862	CG12891	+	0	0	14600	9450.9	1.54	0
chr2L	11040939	11041938	FBgn0032330	CG31868	+	0	0	15296	9999.4	1.53	0
chr2R	24963720	24964719	FBgn0035088	CG3776	+	0	0	9586	6257.1	1.53	0
chrX	2353586	2354945	FBgn0003159	CG2841	+	0	0	56296	36860	1.53	0
chr2R	9427172	9428171	FBgn0033412	CG13955	+	0	0	10136	6647.3	1.52	0
chrX	6602839	6603968	FBgn0029881	CG3973	+	0	0	13241	8723.1	1.52	0
chr3R	17709201	17710200	FBgn0261885	CG7467	+	0	0	12597	8362.8	1.51	0
chr3L	9695283	9696282	FBgn0015321	CG8284	+	0	0	26701	18181.3	1.47	0
chr2R	6628889	6629888	FBgn0262736	CG3161	+	0	0	59202	40880.2	1.45	0
chr3L	19871387	19872386	FBgn0036913	CG8334	+	0	0	19508	13970	1.4	0
chr3R	23225675	23227088	FBgn0262975	CG43286	+	0	0	22397	16260.2	1.38	0
chr2L	8691701	8692700	FBgn0004914	CG9310	+	0	0	21912	15940	1.37	0
chr2R	7692289	7693350	FBgn0033212	CG1399	+	0	0	29364	21548.7	1.36	0
chr3L	3123635	3124634	FBgn0052273	CR32273	+	0	0	21313	15819.6	1.35	0
chr3R	20829426	20830425	FBgn0027493	CG17273	+	0	0	48175	39363.1	1.22	0
chr3R	9502618	9503617	FBgn0014380	CG9366	+	0	0	16257	12022.6	1.35	5.15e-294
chr3L	12074154	12075153	FBgn0284221	CG5661	+	0	0	6848	4255.8	1.61	1.58e-291
chr3L	3776560	3777559	FBgn0052264	CG32264	+	0	0	15707	11606.2	1.35	1.22e-285
chr2L	2977044	2978043	FBgn0031483	CG9641	+	0	0	6466	3995.4	1.62	1.57e-281
chr3L	13252457	13253456	FBgn0052119	CG32119	+	0	0	9233	6274.6	1.47	1.08e-266
chr3L	17535799	17536798	FBgn0259174	CG42279	+	0	0	3575	1900.7	1.88	2.78e-256
chr3L	8456163	8457162	FBgn0010825	CG6964	+	0	0	7210	4697	1.54	4.27e-253
chr3L	22834190	22835671	FBgn0027339	CG11352	+	0	0	15872	11971.6	1.33	1.09e-252
chr3L	5642332	5643525	FBgn0035625	CG5249	+	0	0	16029	12140.1	1.32	3.89e-248
chrX	1388316	1389350	FBgn0024985	CG11448	+	0	0	5495	3385.7	1.62	3.07e-242
chr2L	16298772	16299771	FBgn0028375	CG5876	+	0	0	3259	1722.7	1.89	1.13e-237
chr3L	9854284	9855283	FBgn0004390	CG6721	+	0	0	5247	3234.7	1.62	6.41e-231
chr3L	1100899	1101898	FBgn0004870	CG9097	+	0	0	9895	7020	1.41	4.02e-229
chrX	16598134	16599133	FBgn0015615	CG9802	+	0	0	5456	3434.5	1.59	2.4e-221
chr3R	5080981	5081980	FBgn0010313	CG2530	+	0	0	10376	7470	1.39	2.86e-221
chrX	9109139	9110138	FBgn0030089	CG9113	+	0	0	19059	15134.1	1.26	1.17e-206
chr3R	8810931	8811930	FBgn0037635	CG9837	+	0	0	8967	6386.2	1.4	1.65e-203
chr3L	3403521	3404520	FBgn0014388	CG1921	+	0	0	3509	2023.2	1.73	2.11e-196
chr2R	15931077	15932129	FBgn0034049	CG8291	+	0	0	16493	12963.5	1.27	1.62e-194
chr3R	11639212	11640211	FBgn0262081	CG42317	+	0	0	7889	5671.4	1.39	3.61e-170
chr3L	6569483	6570482	FBgn0042185	CG18769	+	0	0	5664	3823.3	1.48	7.1e-170
chr3R	20263329	20264814	FBgn0262582	CG43122	+	0	0	16477	13175.7	1.25	8.74e-169
chrX	19320153	19321170	FBgn0259834	CG8062	+	0	0	11241	8581.6	1.31	1.99e-165
chr3R	5610551	5611550	FBgn0019637	CG1433	+	0	0	8048	5902.6	1.36	2.21e-154
chr3L	3246334	3247521	FBgn0263617	CR43626	+	0	0	10350	7898.9	1.31	7.89e-153
chr3L	20732260	20733689	FBgn0264573	CR43945	+	0	0	21040	17480.4	1.2	3.33e-150
chr2R	18410986	18411985	FBgn0013983	CG5576	+	0	0	7071	5144.8	1.37	1.56e-142
chr2R	20129777	20130776	NA	NA	+	0	0	7246	5306.8	1.37	1.93e-140
chr3L	2150143	2151142	FBgn0052311	CG33484	+	0	0	8864	6708.6	1.32	6.18e-139
chr3R	5101903	5102902	NA	NA	+	0	0	5834	4123.8	1.41	9.34e-139
chr3L	6254715	6255714	FBgn0035696	CG10173	+	0	0	11073	8771.2	1.26	1.82e-123
chr3R	21856528	21857527	FBgn0015229	CG6575	+	0	0	16009	13242.1	1.21	4.49e-120
chr3R	5861746	5862745	FBgn0037391	CG2017	+	0	0	14126	11566.8	1.22	3.1e-117
chr2R	20162278	20164148	NA	NA	+	0	0	12319	10005.3	1.23	1.38e-110
chr3L	9676645	9677644	FBgn0016081	CG32045	+	0	0	4257	2964.8	1.44	4.92e-110
chr2R	9443434	9444433	FBgn0259234	CG42332	+	0	0	8349	6499.3	1.28	3.16e-107
chr3L	21024472	21025471	FBgn0037044	CG10585	+	0	0	8579	6752.3	1.27	3.54e-101
chr3R	11647558	11648557	FBgn0037926	CG10535	+	0	0	8868	7146.2	1.24	5.31e-86
chr3L	16149376	16150375	FBgn0036576	CG5151	+	0	0	8988	7304.5	1.23	8.11e-81
chr2R	15245175	15246174	FBgn0003328	NA	+	0	0	6939	5523.4	1.26	3.69e-75
chr3R	16245743	16246763	FBgn0040071	CG6889	+	0	0	8891	7362.8	1.21	6.91e-67
chrX	2505349	2506348	FBgn0284408	CG33950	+	0	0	8341	6931.8	1.2	1.08e-60
chr2R	7405757	7406756	FBgn0033166	CG11166	+	0	0	2143	1498.1	1.43	2.15e-55
chr2L	20715977	20716976	FBgn0266844	CR45306	+	0	0	4172	3383.5	1.23	2.45e-39
chrX	7229270	7230269	FBgn0029939	CG9650	+	0	0	3845	3182.9	1.21	3.49e-30
chr3L	22887448	22888519	FBgn0037203	CG11128	+	0	0	27530	21637.7	1.27	3.46e-323

## Sheet: merged_esg-dam(ctrl and Rad21-)
chr	start	end	condition
chr2L	128113	129290	Both
chr2L	321832	323093	Both
chr2L	857693	858821	Both
chr2L	866357	867516	Both
chr2L	15493482	15494568	Both
chr2L	16521923	16523491	Both
chr2L	20821824	20822824	Both
chr2R	7149477	7150627	Both
chr2R	7692288	7693350	Both
chr2R	8195541	8196692	Both
chr2R	10124870	10125894	Both
chr2R	10476482	10477640	Both
chr2R	10601886	10602950	Both
chr2R	10854702	10855702	Both
chr2R	11204643	11205643	Both
chr2R	12588818	12590178	Both
chr2R	12926082	12927388	Both
chr2R	13333318	13334354	Both
chr2R	13546148	13547183	Both
chr2R	13923872	13924971	Both
chr2R	14289944	14290944	Both
chr2R	15674993	15676243	Both
chr2R	15744263	15745379	Both
chr2R	16579574	16580574	Both
chr2R	16581978	16583315	Both
chr2R	16817911	16819080	Both
chr2R	17086517	17087517	Both
chr2R	17710392	17711868	Both
chr2R	21287993	21288993	Both
chr2R	21645965	21647735	Both
chr2R	21708512	21709512	Both
chr2R	22569584	22570584	Both
chr2R	23570786	23572038	Both
chr2R	24551702	24552702	Both
chr2R	24682191	24683390	Both
chr2R	24984990	24986767	Both
chr3L	71909	72909	Both
chr3L	648796	650633	Both
chr3L	765203	766721	Both
chr3L	781087	782087	Both
chr3L	1098263	1099269	Both
chr3L	1324738	1325955	Both
chr3L	3046154	3047154	Both
chr3L	3123634	3124634	Both
chr3L	3208464	3209629	Both
chr3L	3246333	3247521	Both
chr3L	5642331	5643525	Both
chr3L	6254714	6255714	Both
chr3L	7094496	7095496	Both
chr3L	8675617	8676617	Both
chr3L	8699076	8700195	Both
chr3L	9128120	9129147	Both
chr3L	9358024	9359073	Both
chr3L	9396398	9397398	Both
chr3L	9421061	9422166	Both
chr3L	9502038	9503855	Both
chr3L	9695282	9696282	Both
chr3L	12407455	12409316	Both
chr3L	13484713	13486238	Both
chr3L	14986898	14988042	Both
chr3L	17972075	17973075	Both
chr3L	19791667	19792667	Both
chr3L	20447691	20448953	Both
chr3L	20732259	20733689	Both
chr3L	21962522	21963528	Both
chr3L	22834189	22835671	Both
chr3R	4912438	4914278	Both
chr3R	4994919	4996160	Both
chr3R	5215761	5216761	Both
chr3R	5317833	5318833	Both
chr3R	5516928	5518159	Both
chr3R	8356958	8358386	Both
chr3R	9418136	9419488	Both
chr3R	9502617	9503617	Both
chr3R	9927641	9928876	Both
chr3R	10083873	10085441	Both
chr3R	10098035	10099039	Both
chr3R	10389918	10390918	Both
chr3R	11811750	11813285	Both
chr3R	13032421	13033421	Both
chr3R	15197119	15199007	Both
chr3R	16245742	16246763	Both
chr3R	16249576	16250576	Both
chr3R	16987008	16988008	Both
chr3R	18398702	18399702	Both
chr3R	20550335	20551557	Both
chr3R	20829425	20830425	Both
chr3R	21203654	21205488	Both
chr3R	21856527	21857527	Both
chr3R	21896516	21898147	Both
chr3R	23225674	23227088	Both
chr3R	23991851	23993093	Both
chr3R	24230296	24231701	Both
chr3R	29290823	29291991	Both
chr3R	30271507	30272546	Both
chrX	789697	790986	Both
chrX	1384774	1385804	Both
chrX	1388315	1389350	Both
chrX	2049548	2050548	Both
chrX	2121977	2122977	Both
chrX	2136168	2137296	Both
chrX	2193383	2194853	Both
chrX	2353585	2354945	Both
chrX	2457228	2458685	Both
chrX	3675067	3676616	Both
chrX	4323798	4325662	Both
chrX	4613236	4614334	Both
chrX	5744479	5745479	Both
chrX	6997481	6998481	Both
chrX	9192726	9194231	Both
chrX	9645383	9646647	Both
chrX	10773305	10774305	Both
chrX	11422993	11423993	Both
chrX	13305151	13306151	Both
chrX	13405428	13406547	Both
chrX	13640829	13641855	Both
chrX	15044799	15045838	Both
chrX	15070143	15071490	Both
chrX	15500965	15502809	Both
chrX	15787575	15788575	Both
chrX	15812496	15813496	Both
chrX	19320152	19321170	Both
chrX	19667787	19668794	Both
chrX	19752773	19753793	Both
chrX	20253424	20254574	Both
chrX	21064416	21065752	Both
chr2R	24749459	24750687	Both
chr3R	25739570	25740892	Both
chrX	19153731	19154731	Both
chrX	10739341	10741248	Both
chrX	16281498	16282706	Both
chr2R	12928193	12929554	Both
chr3L	8057632	8058743	Both
chr3R	10268506	10269684	Both
chr3R	23723544	23725505	Both
chrX	6859534	6860534	Both
chr3R	5764348	5765495	Both
chr2L	12720231	12721258	Both
chr3L	8691470	8692470	Both
chr2R	20162277	20164148	Both
chr3L	20784765	20785869	Both
chr3L	11169689	11170730	Both
chrX	10839173	10840971	Both
chr2L	7677094	7678605	Both
chr2L	15246293	15247293	Both
chrX	17878140	17879140	Both
chr2R	15931076	15932129	Both
chrX	6602838	6603968	Both
chr3L	22887447	22888519	Both
chr3R	12699961	12701351	Both
chrX	10718319	10719725	Both
chr2R	6132717	6133834	Both
chr3L	546897	548487	Both
chr2L	7973680	7974680	Both
chr3L	12078713	12079804	Both
chr2R	18813202	18814208	Both
chr3R	20263328	20264814	Both
chr2L	2199351	2200470	Both
chr2L	2175225	2176225	Both
chr2L	2177790	2178907	Both
chr2L	2750303	2751711	Both
chr2L	2863532	2864909	Both
chr2L	2987854	2988985	Both
chr2L	5977669	5979405	Both
chr2L	6683560	6684560	Both
chr2L	8534371	8535845	Both
chr2L	10752320	10753339	Both
chr2L	11065392	11066572	Both
chr2L	12589277	12590515	Both
chr3R	9956395	9958088	Both
chr3R	22525209	22526571	Both
chr3R	26917817	26919153	Both
chr2L	72348	73348	esg-Dam-only
chr2L	245233	246233	esg-Dam-only
chr2L	285838	286838	esg-Dam-only
chr2L	323369	324369	esg-Dam-only
chr2L	483319	484319	esg-Dam-only
chr2L	15484045	15485045	esg-Dam-only
chr2L	15745367	15746367	esg-Dam-only
chr2L	16283848	16284848	esg-Dam-only
chr2L	16888084	16889084	esg-Dam-only
chr2L	17388994	17389994	esg-Dam-only
chr2L	17448971	17449971	esg-Dam-only
chr2L	18146728	18147728	esg-Dam-only
chr2L	18561282	18562282	esg-Dam-only
chr2L	18819930	18820930	esg-Dam-only
chr2L	18829898	18830898	esg-Dam-only
chr2L	18995383	18996383	esg-Dam-only
chr2L	19139053	19140053	esg-Dam-only
chr2L	19155808	19156808	esg-Dam-only
chr2L	19410299	19411299	esg-Dam-only
chr2L	19432831	19433831	esg-Dam-only
chr2L	19947922	19948922	esg-Dam-only
chr2L	19967101	19968101	esg-Dam-only
chr2L	20757980	20758980	esg-Dam-only
chr2L	20792439	20793439	esg-Dam-only
chr2L	20882696	20883696	esg-Dam-only
chr2L	20890234	20891234	esg-Dam-only
chr2R	5982679	5983679	esg-Dam-only
chr2R	6022327	6023327	esg-Dam-only
chr2R	6121074	6122074	esg-Dam-only
chr2R	6124979	6125979	esg-Dam-only
chr2R	6141147	6142147	esg-Dam-only
chr2R	6145107	6146107	esg-Dam-only
chr2R	6178875	6179875	esg-Dam-only
chr2R	6502034	6503034	esg-Dam-only
chr2R	6537064	6538064	esg-Dam-only
chr2R	6548061	6549061	esg-Dam-only
chr2R	6628888	6629888	esg-Dam-only
chr2R	6650137	6651137	esg-Dam-only
chr2R	6715154	6716154	esg-Dam-only
chr2R	6787963	6788963	esg-Dam-only
chr2R	6992372	6993372	esg-Dam-only
chr2R	7045201	7046201	esg-Dam-only
chr2R	7060584	7061584	esg-Dam-only
chr2R	7254584	7255584	esg-Dam-only
chr2R	7407183	7408183	esg-Dam-only
chr2R	7450783	7451783	esg-Dam-only
chr2R	7457763	7458763	esg-Dam-only
chr2R	7491272	7492272	esg-Dam-only
chr2R	7499699	7500699	esg-Dam-only
chr2R	7533377	7534377	esg-Dam-only
chr2R	7566416	7567416	esg-Dam-only
chr2R	7614803	7615803	esg-Dam-only
chr2R	7718944	7719944	esg-Dam-only
chr2R	7758666	7759666	esg-Dam-only
chr2R	7782499	7783499	esg-Dam-only
chr2R	7802274	7803274	esg-Dam-only
chr2R	8148163	8149163	esg-Dam-only
chr2R	8610492	8611492	esg-Dam-only
chr2R	8653351	8654351	esg-Dam-only
chr2R	9139294	9140294	esg-Dam-only
chr2R	9148765	9149765	esg-Dam-only
chr2R	9413855	9414855	esg-Dam-only
chr2R	9587959	9588959	esg-Dam-only
chr2R	9826911	9827911	esg-Dam-only
chr2R	9834051	9835051	esg-Dam-only
chr2R	9839200	9840200	esg-Dam-only
chr2R	9856915	9857915	esg-Dam-only
chr2R	9890003	9891003	esg-Dam-only
chr2R	9928186	9929186	esg-Dam-only
chr2R	10129913	10130913	esg-Dam-only
chr2R	10164054	10165054	esg-Dam-only
chr2R	10271659	10272659	esg-Dam-only
chr2R	10276028	10277028	esg-Dam-only
chr2R	10538122	10539122	esg-Dam-only
chr2R	10645415	10646415	esg-Dam-only
chr2R	10649016	10650016	esg-Dam-only
chr2R	11191978	11192978	esg-Dam-only
chr2R	11193909	11194909	esg-Dam-only
chr2R	11266081	11267081	esg-Dam-only
chr2R	11631808	11632808	esg-Dam-only
chr2R	11637208	11638208	esg-Dam-only
chr2R	11659865	11660865	esg-Dam-only
chr2R	11716406	11717406	esg-Dam-only
chr2R	12173127	12174127	esg-Dam-only
chr2R	12343570	12344570	esg-Dam-only
chr2R	12951784	12952784	esg-Dam-only
chr2R	13232332	13233332	esg-Dam-only
chr2R	13233934	13234934	esg-Dam-only
chr2R	13337029	13338029	esg-Dam-only
chr2R	13448672	13449672	esg-Dam-only
chr2R	13853745	13854745	esg-Dam-only
chr2R	13895946	13896946	esg-Dam-only
chr2R	13925873	13926873	esg-Dam-only
chr2R	13936239	13937239	esg-Dam-only
chr2R	13978329	13979329	esg-Dam-only
chr2R	14025604	14026604	esg-Dam-only
chr2R	14333693	14334693	esg-Dam-only
chr2R	14481894	14482894	esg-Dam-only
chr2R	14486065	14487065	esg-Dam-only
chr2R	14927345	14928345	esg-Dam-only
chr2R	15123727	15124727	esg-Dam-only
chr2R	15130759	15131759	esg-Dam-only
chr2R	15246378	15247378	esg-Dam-only
chr2R	15356660	15357660	esg-Dam-only
chr2R	15530858	15531858	esg-Dam-only
chr2R	15558070	15559070	esg-Dam-only
chr2R	15768911	15769911	esg-Dam-only
chr2R	15816683	15817683	esg-Dam-only
chr2R	16018865	16019865	esg-Dam-only
chr2R	16104068	16105068	esg-Dam-only
chr2R	16196972	16197972	esg-Dam-only
chr2R	16211051	16212051	esg-Dam-only
chr2R	16385600	16386600	esg-Dam-only
chr2R	16587297	16588297	esg-Dam-only
chr2R	16666108	16667108	esg-Dam-only
chr2R	16783770	16784770	esg-Dam-only
chr2R	16832961	16833961	esg-Dam-only
chr2R	17100049	17101049	esg-Dam-only
chr2R	17406187	17407187	esg-Dam-only
chr2R	17543590	17544590	esg-Dam-only
chr2R	17800952	17801952	esg-Dam-only
chr2R	18150709	18151709	esg-Dam-only
chr2R	18503407	18504407	esg-Dam-only
chr2R	18610871	18611871	esg-Dam-only
chr2R	18620675	18621675	esg-Dam-only
chr2R	18776376	18777376	esg-Dam-only
chr2R	18800075	18801075	esg-Dam-only
chr2R	18802949	18803949	esg-Dam-only
chr2R	19137158	19138158	esg-Dam-only
chr2R	19394982	19395982	esg-Dam-only
chr2R	19462230	19463230	esg-Dam-only
chr2R	19467540	19468540	esg-Dam-only
chr2R	20111318	20112318	esg-Dam-only
chr2R	20128034	20129034	esg-Dam-only
chr2R	20320176	20321176	esg-Dam-only
chr2R	20534022	20535022	esg-Dam-only
chr2R	20834871	20835871	esg-Dam-only
chr2R	21032082	21033082	esg-Dam-only
chr2R	21048920	21049920	esg-Dam-only
chr2R	21082854	21083854	esg-Dam-only
chr2R	21144218	21145218	esg-Dam-only
chr2R	21250017	21251017	esg-Dam-only
chr2R	21312325	21313325	esg-Dam-only
chr2R	21361678	21362678	esg-Dam-only
chr2R	21379024	21380024	esg-Dam-only
chr2R	21541962	21542962	esg-Dam-only
chr2R	21548875	21549875	esg-Dam-only
chr2R	21553133	21554133	esg-Dam-only
chr2R	21606103	21607103	esg-Dam-only
chr2R	21611034	21612034	esg-Dam-only
chr2R	21633364	21634364	esg-Dam-only
chr2R	21699745	21700745	esg-Dam-only
chr2R	22244578	22245578	esg-Dam-only
chr2R	22300968	22301968	esg-Dam-only
chr2R	22324464	22325464	esg-Dam-only
chr2R	22389885	22390885	esg-Dam-only
chr2R	22542706	22543706	esg-Dam-only
chr2R	22561011	22562011	esg-Dam-only
chr2R	22591507	22592507	esg-Dam-only
chr2R	22667437	22668437	esg-Dam-only
chr2R	22669551	22670551	esg-Dam-only
chr2R	22681484	22682484	esg-Dam-only
chr2R	22804797	22805797	esg-Dam-only
chr2R	22828891	22829891	esg-Dam-only
chr2R	22998960	22999960	esg-Dam-only
chr2R	23383548	23384548	esg-Dam-only
chr2R	23668507	23669507	esg-Dam-only
chr2R	23717867	23718867	esg-Dam-only
chr2R	23725341	23726341	esg-Dam-only
chr2R	23745344	23746344	esg-Dam-only
chr2R	23845205	23846205	esg-Dam-only
chr2R	23932321	23933321	esg-Dam-only
chr2R	23978762	23979762	esg-Dam-only
chr2R	23981613	23982613	esg-Dam-only
chr2R	24131390	24132390	esg-Dam-only
chr2R	24187070	24188070	esg-Dam-only
chr2R	24540100	24541100	esg-Dam-only
chr2R	24553725	24554725	esg-Dam-only
chr2R	24677190	24678190	esg-Dam-only
chr2R	24685399	24686399	esg-Dam-only
chr2R	24687583	24688583	esg-Dam-only
chr2R	24767676	24768676	esg-Dam-only
chr2R	24882272	24883272	esg-Dam-only
chr2R	24900960	24901960	esg-Dam-only
chr2R	24927155	24928155	esg-Dam-only
chr2R	24944848	24945848	esg-Dam-only
chr2R	24979958	24980958	esg-Dam-only
chr2R	25000997	25001997	esg-Dam-only
chr2R	25188285	25189285	esg-Dam-only
chr3L	85849	86849	esg-Dam-only
chr3L	159575	160575	esg-Dam-only
chr3L	216942	217942	esg-Dam-only
chr3L	311580	312580	esg-Dam-only
chr3L	340394	341394	esg-Dam-only
chr3L	566426	567426	esg-Dam-only
chr3L	633010	634010	esg-Dam-only
chr3L	639833	640833	esg-Dam-only
chr3L	684976	685976	esg-Dam-only
chr3L	750042	751042	esg-Dam-only
chr3L	753252	754252	esg-Dam-only
chr3L	784377	785377	esg-Dam-only
chr3L	787564	788564	esg-Dam-only
chr3L	819690	820690	esg-Dam-only
chr3L	875311	876311	esg-Dam-only
chr3L	1030718	1031718	esg-Dam-only
chr3L	1202799	1203799	esg-Dam-only
chr3L	1204648	1205648	esg-Dam-only
chr3L	1318966	1319966	esg-Dam-only
chr3L	1347184	1348184	esg-Dam-only
chr3L	1638553	1639553	esg-Dam-only
chr3L	1726148	1727148	esg-Dam-only
chr3L	1740412	1741412	esg-Dam-only
chr3L	1885824	1886824	esg-Dam-only
chr3L	2417156	2418156	esg-Dam-only
chr3L	2569799	2570799	esg-Dam-only
chr3L	2770157	2771157	esg-Dam-only
chr3L	3036552	3037552	esg-Dam-only
chr3L	3051789	3052789	esg-Dam-only
chr3L	3082013	3083013	esg-Dam-only
chr3L	3165017	3166017	esg-Dam-only
chr3L	3178902	3179902	esg-Dam-only
chr3L	3197793	3198793	esg-Dam-only
chr3L	3238396	3239396	esg-Dam-only
chr3L	3302141	3303141	esg-Dam-only
chr3L	3307548	3308548	esg-Dam-only
chr3L	3349844	3350844	esg-Dam-only
chr3L	3396754	3397754	esg-Dam-only
chr3L	3411257	3412257	esg-Dam-only
chr3L	3544933	3545933	esg-Dam-only
chr3L	3776559	3777559	esg-Dam-only
chr3L	4070698	4071698	esg-Dam-only
chr3L	4103581	4104581	esg-Dam-only
chr3L	4170659	4171659	esg-Dam-only
chr3L	4221895	4222895	esg-Dam-only
chr3L	4226096	4227096	esg-Dam-only
chr3L	4410919	4411919	esg-Dam-only
chr3L	4542159	4543159	esg-Dam-only
chr3L	5184990	5185990	esg-Dam-only
chr3L	5567489	5568489	esg-Dam-only
chr3L	5656296	5657296	esg-Dam-only
chr3L	5800887	5801887	esg-Dam-only
chr3L	6610362	6611362	esg-Dam-only
chr3L	6947901	6948901	esg-Dam-only
chr3L	6977341	6978341	esg-Dam-only
chr3L	7131177	7132177	esg-Dam-only
chr3L	7344500	7345500	esg-Dam-only
chr3L	7360579	7361579	esg-Dam-only
chr3L	7530013	7531013	esg-Dam-only
chr3L	7865585	7866585	esg-Dam-only
chr3L	7911339	7912339	esg-Dam-only
chr3L	7961260	7962260	esg-Dam-only
chr3L	8096319	8097319	esg-Dam-only
chr3L	8288685	8289685	esg-Dam-only
chr3L	8347219	8348219	esg-Dam-only
chr3L	8425400	8426400	esg-Dam-only
chr3L	8458028	8459028	esg-Dam-only
chr3L	8545801	8546801	esg-Dam-only
chr3L	8550094	8551094	esg-Dam-only
chr3L	8701499	8702499	esg-Dam-only
chr3L	9372214	9373214	esg-Dam-only
chr3L	9614998	9615998	esg-Dam-only
chr3L	9671048	9672048	esg-Dam-only
chr3L	10682837	10683837	esg-Dam-only
chr3L	10897480	10898480	esg-Dam-only
chr3L	11045007	11046007	esg-Dam-only
chr3L	11080456	11081456	esg-Dam-only
chr3L	11209776	11210776	esg-Dam-only
chr3L	11213642	11214642	esg-Dam-only
chr3L	11352856	11353856	esg-Dam-only
chr3L	11777592	11778592	esg-Dam-only
chr3L	12084335	12085335	esg-Dam-only
chr3L	12487221	12488221	esg-Dam-only
chr3L	12490343	12491343	esg-Dam-only
chr3L	12500923	12501923	esg-Dam-only
chr3L	12533788	12534788	esg-Dam-only
chr3L	12798502	12799502	esg-Dam-only
chr3L	13232440	13233440	esg-Dam-only
chr3L	13254752	13255752	esg-Dam-only
chr3L	13259254	13260254	esg-Dam-only
chr3L	13476990	13477990	esg-Dam-only
chr3L	13488515	13489515	esg-Dam-only
chr3L	13862674	13863674	esg-Dam-only
chr3L	14106613	14107613	esg-Dam-only
chr3L	14207083	14208083	esg-Dam-only
chr3L	14364390	14365390	esg-Dam-only
chr3L	14751206	14752206	esg-Dam-only
chr3L	14757907	14758907	esg-Dam-only
chr3L	15234020	15235020	esg-Dam-only
chr3L	15597049	15598049	esg-Dam-only
chr3L	15974767	15975767	esg-Dam-only
chr3L	16153487	16154487	esg-Dam-only
chr3L	16159222	16160222	esg-Dam-only
chr3L	16484986	16485986	esg-Dam-only
chr3L	16698534	16699534	esg-Dam-only
chr3L	16748318	16749318	esg-Dam-only
chr3L	16799561	16800561	esg-Dam-only
chr3L	16955521	16956521	esg-Dam-only
chr3L	16969926	16970926	esg-Dam-only
chr3L	16988626	16989626	esg-Dam-only
chr3L	17000310	17001310	esg-Dam-only
chr3L	17622972	17623972	esg-Dam-only
chr3L	17662807	17663807	esg-Dam-only
chr3L	17756909	17757909	esg-Dam-only
chr3L	17950029	17951029	esg-Dam-only
chr3L	18002875	18003875	esg-Dam-only
chr3L	18011361	18012361	esg-Dam-only
chr3L	18015519	18016519	esg-Dam-only
chr3L	18104630	18105630	esg-Dam-only
chr3L	18272107	18273107	esg-Dam-only
chr3L	18756711	18757711	esg-Dam-only
chr3L	18771299	18772299	esg-Dam-only
chr3L	18868197	18869197	esg-Dam-only
chr3L	19168769	19169769	esg-Dam-only
chr3L	19173260	19174260	esg-Dam-only
chr3L	19631734	19632734	esg-Dam-only
chr3L	19812857	19813857	esg-Dam-only
chr3L	19896847	19897847	esg-Dam-only
chr3L	19906598	19907598	esg-Dam-only
chr3L	19945261	19946261	esg-Dam-only
chr3L	20187848	20188848	esg-Dam-only
chr3L	20197292	20198292	esg-Dam-only
chr3L	20385833	20386833	esg-Dam-only
chr3L	20398149	20399149	esg-Dam-only
chr3L	20509562	20510562	esg-Dam-only
chr3L	21204526	21205526	esg-Dam-only
chr3L	21252343	21253343	esg-Dam-only
chr3L	21934396	21935396	esg-Dam-only
chr3L	22001568	22002568	esg-Dam-only
chr3L	22004860	22005860	esg-Dam-only
chr3L	22267494	22268494	esg-Dam-only
chr3L	22463806	22464806	esg-Dam-only
chr3L	22671375	22672375	esg-Dam-only
chr3L	22774329	22775329	esg-Dam-only
chr3L	22823193	22824193	esg-Dam-only
chr3L	22870951	22871951	esg-Dam-only
chr3R	4462123	4463123	esg-Dam-only
chr3R	4469736	4470736	esg-Dam-only
chr3R	4649545	4650545	esg-Dam-only
chr3R	4989348	4990348	esg-Dam-only
chr3R	5229414	5230414	esg-Dam-only
chr3R	5571127	5572127	esg-Dam-only
chr3R	5653637	5654637	esg-Dam-only
chr3R	5658949	5659949	esg-Dam-only
chr3R	5670813	5671813	esg-Dam-only
chr3R	5736358	5737358	esg-Dam-only
chr3R	5793988	5794988	esg-Dam-only
chr3R	5843123	5844123	esg-Dam-only
chr3R	6644076	6645076	esg-Dam-only
chr3R	6812242	6813242	esg-Dam-only
chr3R	7089284	7090284	esg-Dam-only
chr3R	7540826	7541826	esg-Dam-only
chr3R	7906413	7907413	esg-Dam-only
chr3R	8112740	8113740	esg-Dam-only
chr3R	8120384	8121384	esg-Dam-only
chr3R	8353349	8354349	esg-Dam-only
chr3R	8927319	8928319	esg-Dam-only
chr3R	8939029	8940029	esg-Dam-only
chr3R	9033149	9034149	esg-Dam-only
chr3R	9048798	9049798	esg-Dam-only
chr3R	9054966	9055966	esg-Dam-only
chr3R	9225923	9226923	esg-Dam-only
chr3R	9528205	9529205	esg-Dam-only
chr3R	9572248	9573248	esg-Dam-only
chr3R	9627772	9628772	esg-Dam-only
chr3R	9703853	9704853	esg-Dam-only
chr3R	9769290	9770290	esg-Dam-only
chr3R	9987306	9988306	esg-Dam-only
chr3R	10209840	10210840	esg-Dam-only
chr3R	10282619	10283619	esg-Dam-only
chr3R	10391607	10392607	esg-Dam-only
chr3R	10862495	10863495	esg-Dam-only
chr3R	10885094	10886094	esg-Dam-only
chr3R	11216335	11217335	esg-Dam-only
chr3R	11235085	11236085	esg-Dam-only
chr3R	11565722	11566722	esg-Dam-only
chr3R	11647557	11648557	esg-Dam-only
chr3R	11669321	11670321	esg-Dam-only
chr3R	11758744	11759744	esg-Dam-only
chr3R	11962774	11963774	esg-Dam-only
chr3R	11967977	11968977	esg-Dam-only
chr3R	12360543	12361543	esg-Dam-only
chr3R	12365558	12366558	esg-Dam-only
chr3R	12430252	12431252	esg-Dam-only
chr3R	12643253	12644253	esg-Dam-only
chr3R	12647458	12648458	esg-Dam-only
chr3R	13814642	13815642	esg-Dam-only
chr3R	14069709	14070709	esg-Dam-only
chr3R	14289215	14290215	esg-Dam-only
chr3R	14295070	14296070	esg-Dam-only
chr3R	14298397	14299397	esg-Dam-only
chr3R	14473532	14474532	esg-Dam-only
chr3R	14679607	14680607	esg-Dam-only
chr3R	14723063	14724063	esg-Dam-only
chr3R	14738115	14739115	esg-Dam-only
chr3R	14810721	14811721	esg-Dam-only
chr3R	14817683	14818683	esg-Dam-only
chr3R	15091497	15092497	esg-Dam-only
chr3R	15115512	15116512	esg-Dam-only
chr3R	15268400	15269400	esg-Dam-only
chr3R	15341944	15342944	esg-Dam-only
chr3R	15834351	15835351	esg-Dam-only
chr3R	15995105	15996105	esg-Dam-only
chr3R	16005594	16006594	esg-Dam-only
chr3R	16049041	16050041	esg-Dam-only
chr3R	16071447	16072447	esg-Dam-only
chr3R	16205885	16206885	esg-Dam-only
chr3R	16223589	16224589	esg-Dam-only
chr3R	16231093	16232093	esg-Dam-only
chr3R	16234321	16235321	esg-Dam-only
chr3R	16305160	16306160	esg-Dam-only
chr3R	16331644	16332644	esg-Dam-only
chr3R	16348511	16349511	esg-Dam-only
chr3R	16355369	16356369	esg-Dam-only
chr3R	16981020	16982020	esg-Dam-only
chr3R	17007590	17008590	esg-Dam-only
chr3R	17146058	17147058	esg-Dam-only
chr3R	17964717	17965717	esg-Dam-only
chr3R	18167669	18168669	esg-Dam-only
chr3R	18252294	18253294	esg-Dam-only
chr3R	18279843	18280843	esg-Dam-only
chr3R	18449917	18450917	esg-Dam-only
chr3R	18747662	18748662	esg-Dam-only
chr3R	19152619	19153619	esg-Dam-only
chr3R	19250660	19251660	esg-Dam-only
chr3R	19321963	19322963	esg-Dam-only
chr3R	19879615	19880615	esg-Dam-only
chr3R	19905359	19906359	esg-Dam-only
chr3R	20542577	20543577	esg-Dam-only
chr3R	20563358	20564358	esg-Dam-only
chr3R	20781399	20782399	esg-Dam-only
chr3R	20790981	20791981	esg-Dam-only
chr3R	20984487	20985487	esg-Dam-only
chr3R	21127342	21128342	esg-Dam-only
chr3R	21194261	21195261	esg-Dam-only
chr3R	21246760	21247760	esg-Dam-only
chr3R	21348788	21349788	esg-Dam-only
chr3R	21615374	21616374	esg-Dam-only
chr3R	21719454	21720454	esg-Dam-only
chr3R	21740362	21741362	esg-Dam-only
chr3R	21869730	21870730	esg-Dam-only
chr3R	21948716	21949716	esg-Dam-only
chr3R	22367372	22368372	esg-Dam-only
chr3R	22411816	22412816	esg-Dam-only
chr3R	22450918	22451918	esg-Dam-only
chr3R	22596203	22597203	esg-Dam-only
chr3R	22633055	22634055	esg-Dam-only
chr3R	22749158	22750158	esg-Dam-only
chr3R	23047379	23048379	esg-Dam-only
chr3R	23345729	23346729	esg-Dam-only
chr3R	23518215	23519215	esg-Dam-only
chr3R	23729602	23730602	esg-Dam-only
chr3R	23782066	23783066	esg-Dam-only
chr3R	23898323	23899323	esg-Dam-only
chr3R	23938543	23939543	esg-Dam-only
chr3R	23940992	23941992	esg-Dam-only
chr3R	24319442	24320442	esg-Dam-only
chr3R	24348561	24349561	esg-Dam-only
chr3R	24620819	24621819	esg-Dam-only
chr3R	24629535	24630535	esg-Dam-only
chr3R	24702724	24703724	esg-Dam-only
chr3R	24786823	24787823	esg-Dam-only
chr3R	24798902	24799902	esg-Dam-only
chr3R	25023833	25024833	esg-Dam-only
chr3R	25027271	25028271	esg-Dam-only
chr3R	25051125	25052125	esg-Dam-only
chr3R	25056772	25057772	esg-Dam-only
chr3R	25292386	25293386	esg-Dam-only
chr3R	25328621	25329621	esg-Dam-only
chr3R	25736748	25737748	esg-Dam-only
chr3R	25996111	25997111	esg-Dam-only
chr3R	26009347	26010347	esg-Dam-only
chr3R	26020727	26021727	esg-Dam-only
chr3R	26030548	26031548	esg-Dam-only
chr3R	26121140	26122140	esg-Dam-only
chr3R	26228895	26229895	esg-Dam-only
chr3R	26555470	26556470	esg-Dam-only
chr3R	26876082	26877082	esg-Dam-only
chr3R	26978116	26979116	esg-Dam-only
chr3R	27133442	27134442	esg-Dam-only
chr3R	27238845	27239845	esg-Dam-only
chr3R	27605273	27606273	esg-Dam-only
chr3R	28571263	28572263	esg-Dam-only
chr3R	28623376	28624376	esg-Dam-only
chr3R	28857123	28858123	esg-Dam-only
chr3R	29156524	29157524	esg-Dam-only
chr3R	29214590	29215590	esg-Dam-only
chr3R	29255241	29256241	esg-Dam-only
chr3R	29287246	29288246	esg-Dam-only
chr3R	29458671	29459671	esg-Dam-only
chr3R	29492714	29493714	esg-Dam-only
chr3R	29774148	29775148	esg-Dam-only
chr3R	29776442	29777442	esg-Dam-only
chr3R	29779442	29780442	esg-Dam-only
chr3R	30021576	30022576	esg-Dam-only
chr3R	30100232	30101232	esg-Dam-only
chr3R	30292407	30293407	esg-Dam-only
chr3R	30449090	30450090	esg-Dam-only
chr3R	30466453	30467453	esg-Dam-only
chr3R	30498431	30499431	esg-Dam-only
chr3R	30802275	30803275	esg-Dam-only
chr3R	30916876	30917876	esg-Dam-only
chr3R	31062828	31063828	esg-Dam-only
chr3R	31067270	31068270	esg-Dam-only
chr3R	31195886	31196886	esg-Dam-only
chr3R	31221463	31222463	esg-Dam-only
chr3R	31322980	31323980	esg-Dam-only
chr3R	31580181	31581181	esg-Dam-only
chr3R	31672557	31673557	esg-Dam-only
chr3R	31689250	31690250	esg-Dam-only
chr3R	31713275	31714275	esg-Dam-only
chr3R	31718727	31719727	esg-Dam-only
chr3R	31721718	31722718	esg-Dam-only
chr3R	31724456	31725456	esg-Dam-only
chr3R	31726053	31727053	esg-Dam-only
chrX	521460	522460	esg-Dam-only
chrX	580264	581264	esg-Dam-only
chrX	636155	637155	esg-Dam-only
chrX	767149	768149	esg-Dam-only
chrX	769157	770157	esg-Dam-only
chrX	1050779	1051779	esg-Dam-only
chrX	1171837	1172837	esg-Dam-only
chrX	1177478	1178478	esg-Dam-only
chrX	1229164	1230164	esg-Dam-only
chrX	1239488	1240488	esg-Dam-only
chrX	1268841	1269841	esg-Dam-only
chrX	1276697	1277697	esg-Dam-only
chrX	1281581	1282581	esg-Dam-only
chrX	1346718	1347718	esg-Dam-only
chrX	1370430	1371430	esg-Dam-only
chrX	1380074	1381074	esg-Dam-only
chrX	1465893	1466893	esg-Dam-only
chrX	1577708	1578708	esg-Dam-only
chrX	1615806	1616806	esg-Dam-only
chrX	1619882	1620882	esg-Dam-only
chrX	1826260	1827260	esg-Dam-only
chrX	1940725	1941725	esg-Dam-only
chrX	1990109	1991109	esg-Dam-only
chrX	1995058	1996058	esg-Dam-only
chrX	2043599	2044599	esg-Dam-only
chrX	2069870	2070870	esg-Dam-only
chrX	2145717	2146717	esg-Dam-only
chrX	2180851	2181851	esg-Dam-only
chrX	2222013	2223013	esg-Dam-only
chrX	2317275	2318275	esg-Dam-only
chrX	2461506	2462506	esg-Dam-only
chrX	2465823	2466823	esg-Dam-only
chrX	2506404	2507404	esg-Dam-only
chrX	2589451	2590451	esg-Dam-only
chrX	2592695	2593695	esg-Dam-only
chrX	3136276	3137276	esg-Dam-only
chrX	3373473	3374473	esg-Dam-only
chrX	4574598	4575598	esg-Dam-only
chrX	4584249	4585249	esg-Dam-only
chrX	4606093	4607093	esg-Dam-only
chrX	4678361	4679361	esg-Dam-only
chrX	4706960	4707960	esg-Dam-only
chrX	5047077	5048077	esg-Dam-only
chrX	5517648	5518648	esg-Dam-only
chrX	5689737	5690737	esg-Dam-only
chrX	5886248	5887248	esg-Dam-only
chrX	5901080	5902080	esg-Dam-only
chrX	5976111	5977111	esg-Dam-only
chrX	6061788	6062788	esg-Dam-only
chrX	6284848	6285848	esg-Dam-only
chrX	6546437	6547437	esg-Dam-only
chrX	6551078	6552078	esg-Dam-only
chrX	6774794	6775794	esg-Dam-only
chrX	6777051	6778051	esg-Dam-only
chrX	6778965	6779965	esg-Dam-only
chrX	6800061	6801061	esg-Dam-only
chrX	6803835	6804835	esg-Dam-only
chrX	6804984	6805984	esg-Dam-only
chrX	6868216	6869216	esg-Dam-only
chrX	7230903	7231903	esg-Dam-only
chrX	7295833	7296833	esg-Dam-only
chrX	7299484	7300484	esg-Dam-only
chrX	7303473	7304473	esg-Dam-only
chrX	7308496	7309496	esg-Dam-only
chrX	7318733	7319733	esg-Dam-only
chrX	7578994	7579994	esg-Dam-only
chrX	7707258	7708258	esg-Dam-only
chrX	7938044	7939044	esg-Dam-only
chrX	7965423	7966423	esg-Dam-only
chrX	8242605	8243605	esg-Dam-only
chrX	8420820	8421820	esg-Dam-only
chrX	8507443	8508443	esg-Dam-only
chrX	8683462	8684462	esg-Dam-only
chrX	8890176	8891176	esg-Dam-only
chrX	8895382	8896382	esg-Dam-only
chrX	9060650	9061650	esg-Dam-only
chrX	9577853	9578853	esg-Dam-only
chrX	9584465	9585465	esg-Dam-only
chrX	9598791	9599791	esg-Dam-only
chrX	9641097	9642097	esg-Dam-only
chrX	10111574	10112574	esg-Dam-only
chrX	10220446	10221446	esg-Dam-only
chrX	10478352	10479352	esg-Dam-only
chrX	10581721	10582721	esg-Dam-only
chrX	10886794	10887794	esg-Dam-only
chrX	11339517	11340517	esg-Dam-only
chrX	11681803	11682803	esg-Dam-only
chrX	11695566	11696566	esg-Dam-only
chrX	11873088	11874088	esg-Dam-only
chrX	12735660	12736660	esg-Dam-only
chrX	13390554	13391554	esg-Dam-only
chrX	13403357	13404357	esg-Dam-only
chrX	13410513	13411513	esg-Dam-only
chrX	13625423	13626423	esg-Dam-only
chrX	13678855	13679855	esg-Dam-only
chrX	13811946	13812946	esg-Dam-only
chrX	13813441	13814441	esg-Dam-only
chrX	13814818	13815818	esg-Dam-only
chrX	14119323	14120323	esg-Dam-only
chrX	14483344	14484344	esg-Dam-only
chrX	14949864	14950864	esg-Dam-only
chrX	15048328	15049328	esg-Dam-only
chrX	15078622	15079622	esg-Dam-only
chrX	15453078	15454078	esg-Dam-only
chrX	15543120	15544120	esg-Dam-only
chrX	15592630	15593630	esg-Dam-only
chrX	15624876	15625876	esg-Dam-only
chrX	15702946	15703946	esg-Dam-only
chrX	15733095	15734095	esg-Dam-only
chrX	16278244	16279244	esg-Dam-only
chrX	16318727	16319727	esg-Dam-only
chrX	16405953	16406953	esg-Dam-only
chrX	16413978	16414978	esg-Dam-only
chrX	16421413	16422413	esg-Dam-only
chrX	16440558	16441558	esg-Dam-only
chrX	16572644	16573644	esg-Dam-only
chrX	16598133	16599133	esg-Dam-only
chrX	16643230	16644230	esg-Dam-only
chrX	17296415	17297415	esg-Dam-only
chrX	17624693	17625693	esg-Dam-only
chrX	17626714	17627714	esg-Dam-only
chrX	17826806	17827806	esg-Dam-only
chrX	17875952	17876952	esg-Dam-only
chrX	17880915	17881915	esg-Dam-only
chrX	18276014	18277014	esg-Dam-only
chrX	18510392	18511392	esg-Dam-only
chrX	18645646	18646646	esg-Dam-only
chrX	18653999	18654999	esg-Dam-only
chrX	18776952	18777952	esg-Dam-only
chrX	18783664	18784664	esg-Dam-only
chrX	18870767	18871767	esg-Dam-only
chrX	18972639	18973639	esg-Dam-only
chrX	19000822	19001822	esg-Dam-only
chrX	19179868	19180868	esg-Dam-only
chrX	19187771	19188771	esg-Dam-only
chrX	19244007	19245007	esg-Dam-only
chrX	19260651	19261651	esg-Dam-only
chrX	19305169	19306169	esg-Dam-only
chrX	19315327	19316327	esg-Dam-only
chrX	19353571	19354571	esg-Dam-only
chrX	19479614	19480614	esg-Dam-only
chrX	19500639	19501639	esg-Dam-only
chrX	19630850	19631850	esg-Dam-only
chrX	20481100	20482100	esg-Dam-only
chrX	21039272	21040272	esg-Dam-only
chrX	21377488	21378488	esg-Dam-only
chrX	21518711	21519711	esg-Dam-only
chr2R	18531924	18532924	esg-Dam-only
chr3R	24894529	24895529	esg-Dam-only
chr2R	18412413	18413413	esg-Dam-only
chr3R	9437792	9438792	esg-Dam-only
chr2L	20715976	20716976	esg-Dam-only
chr3L	17005319	17006319	esg-Dam-only
chr3R	15229209	15230209	esg-Dam-only
chr2R	24607143	24608143	esg-Dam-only
chr3R	21071431	21072431	esg-Dam-only
chr3R	25885501	25886501	esg-Dam-only
chrX	599117	600117	esg-Dam-only
chr2R	9430686	9431686	esg-Dam-only
chr3L	886428	887428	esg-Dam-only
chrX	18082559	18083559	esg-Dam-only
chrX	19565449	19566449	esg-Dam-only
chr3L	17009756	17010756	esg-Dam-only
chr3R	5087194	5088194	esg-Dam-only
chrX	13245366	13246366	esg-Dam-only
chr2L	6065931	6066931	esg-Dam-only
chr2R	7822796	7823796	esg-Dam-only
chr2R	11679473	11680473	esg-Dam-only
chr2R	12529812	12530812	esg-Dam-only
chr2L	15488517	15489517	esg-Dam-only
chr3R	16238666	16239666	esg-Dam-only
chrX	1170088	1171088	esg-Dam-only
chr2L	7992845	7993845	esg-Dam-only
chr2R	12437699	12438699	esg-Dam-only
chr2R	15999841	16000841	esg-Dam-only
chr2R	22180697	22181697	esg-Dam-only
chr3L	5808121	5809121	esg-Dam-only
chr2R	18627488	18628488	esg-Dam-only
chr3L	3044262	3045262	esg-Dam-only
chr3R	9392989	9393989	esg-Dam-only
chr3L	2256346	2257346	esg-Dam-only
chr3R	6405018	6406018	esg-Dam-only
chr2L	15912091	15913091	esg-Dam-only
chr3L	1320669	1321669	esg-Dam-only
chr3R	19909303	19910303	esg-Dam-only
chr2R	11196797	11197797	esg-Dam-only
chrX	1248208	1249208	esg-Dam-only
chrX	19665546	19666546	esg-Dam-only
chr3L	11525698	11526698	esg-Dam-only
chr3L	17604735	17605735	esg-Dam-only
chr3L	19870043	19871043	esg-Dam-only
chr2L	6822706	6823706	esg-Dam-only
chr3L	15235308	15236308	esg-Dam-only
chr3R	16446687	16447687	esg-Dam-only
chr3L	9360010	9361010	esg-Dam-only
chrX	21070109	21071109	esg-Dam-only
chr2R	9603719	9604719	esg-Dam-only
chrX	3871611	3872611	esg-Dam-only
chr3L	1516657	1517657	esg-Dam-only
chr3R	5672597	5673597	esg-Dam-only
chr3R	7912048	7913048	esg-Dam-only
chr4	504000	505000	esg-Dam-only
chr2R	8948341	8949341	esg-Dam-only
chrX	2141970	2142970	esg-Dam-only
chr3L	9509680	9510680	esg-Dam-only
chr3R	5263450	5264450	esg-Dam-only
chr2L	5296642	5297642	esg-Dam-only
chr3L	16003503	16004503	esg-Dam-only
chr2R	8152484	8153484	esg-Dam-only
chr3L	9630615	9631615	esg-Dam-only
chr2R	8722490	8723490	esg-Dam-only
chrX	21352320	21353320	esg-Dam-only
chr3L	8705247	8706247	esg-Dam-only
chrX	1183311	1184311	esg-Dam-only
chr3R	18915409	18916409	esg-Dam-only
chr2R	9609455	9610455	esg-Dam-only
chr3R	26226121	26227121	esg-Dam-only
chr2L	10514120	10515120	esg-Dam-only
chrX	6356309	6357309	esg-Dam-only
chrX	11390159	11391159	esg-Dam-only
chr2L	8130253	8131253	esg-Dam-only
chr2R	6531276	6532276	esg-Dam-only
chr3R	7121329	7122329	esg-Dam-only
chr2L	15629701	15630701	esg-Dam-only
chr3L	14555030	14556030	esg-Dam-only
chr2R	10735400	10736400	esg-Dam-only
chrX	1242041	1243041	esg-Dam-only
chrX	11135913	11136913	esg-Dam-only
chrX	10583928	10584928	esg-Dam-only
chr3R	29784117	29785117	esg-Dam-only
chr2L	8381492	8382492	esg-Dam-only
chr2R	8604453	8605453	esg-Dam-only
chrX	12666199	12667199	esg-Dam-only
chr2R	16128065	16129065	esg-Dam-only
chr3R	22624093	22625093	esg-Dam-only
chr2L	300674	301674	esg-Dam-only
chr2L	16255607	16256607	esg-Dam-only
chr2L	1116573	1117573	esg-Dam-only
chr2L	1118399	1119399	esg-Dam-only
chr2L	1447467	1448467	esg-Dam-only
chr2L	1460218	1461218	esg-Dam-only
chr2L	1722262	1723262	esg-Dam-only
chr2L	1885499	1886499	esg-Dam-only
chr2L	2146822	2147822	esg-Dam-only
chr2L	2165536	2166536	esg-Dam-only
chr2L	2167492	2168492	esg-Dam-only
chr2L	2179499	2180499	esg-Dam-only
chr2L	2371086	2372086	esg-Dam-only
chr2L	2769385	2770385	esg-Dam-only
chr2L	2887846	2888846	esg-Dam-only
chr2L	2968952	2969952	esg-Dam-only
chr2L	2993042	2994042	esg-Dam-only
chr2L	3057700	3058700	esg-Dam-only
chr2L	3107773	3108773	esg-Dam-only
chr2L	3362678	3363678	esg-Dam-only
chr2L	3477904	3478904	esg-Dam-only
chr2L	3770834	3771834	esg-Dam-only
chr2L	4328661	4329661	esg-Dam-only
chr2L	4378785	4379785	esg-Dam-only
chr2L	4475960	4476960	esg-Dam-only
chr2L	4888059	4889059	esg-Dam-only
chr2L	4894030	4895030	esg-Dam-only
chr2L	4980825	4981825	esg-Dam-only
chr2L	5096005	5097005	esg-Dam-only
chr2L	5237188	5238188	esg-Dam-only
chr2L	5292376	5293376	esg-Dam-only
chr2L	5805026	5806026	esg-Dam-only
chr2L	5877863	5878863	esg-Dam-only
chr2L	5987474	5988474	esg-Dam-only
chr2L	5997720	5998720	esg-Dam-only
chr2L	6045874	6046874	esg-Dam-only
chr2L	6080066	6081066	esg-Dam-only
chr2L	6086804	6087804	esg-Dam-only
chr2L	6178316	6179316	esg-Dam-only
chr2L	6341085	6342085	esg-Dam-only
chr2L	6342736	6343736	esg-Dam-only
chr2L	6561031	6562031	esg-Dam-only
chr2L	6785689	6786689	esg-Dam-only
chr2L	7013532	7014532	esg-Dam-only
chr2L	7047003	7048003	esg-Dam-only
chr2L	7082474	7083474	esg-Dam-only
chr2L	7495445	7496445	esg-Dam-only
chr2L	7522745	7523745	esg-Dam-only
chr2L	7789928	7790928	esg-Dam-only
chr2L	7812520	7813520	esg-Dam-only
chr2L	8157562	8158562	esg-Dam-only
chr2L	8416913	8417913	esg-Dam-only
chr2L	8701699	8702699	esg-Dam-only
chr2L	8704744	8705744	esg-Dam-only
chr2L	8734382	8735382	esg-Dam-only
chr2L	9012339	9013339	esg-Dam-only
chr2L	9064943	9065943	esg-Dam-only
chr2L	9613085	9614085	esg-Dam-only
chr2L	9619833	9620833	esg-Dam-only
chr2L	9705540	9706540	esg-Dam-only
chr2L	9782525	9783525	esg-Dam-only
chr2L	9784750	9785750	esg-Dam-only
chr2L	9918005	9919005	esg-Dam-only
chr2L	9938325	9939325	esg-Dam-only
chr2L	9986162	9987162	esg-Dam-only
chr2L	10003908	10004908	esg-Dam-only
chr2L	10009579	10010579	esg-Dam-only
chr2L	10662501	10663501	esg-Dam-only
chr2L	11039316	11040316	esg-Dam-only
chr2L	11045194	11046194	esg-Dam-only
chr2L	11970301	11971301	esg-Dam-only
chr2L	12365443	12366443	esg-Dam-only
chr2L	12481823	12482823	esg-Dam-only
chr2L	12530777	12531777	esg-Dam-only
chr2L	13056333	13057333	esg-Dam-only
chr2L	13373385	13374385	esg-Dam-only
chr2L	13837119	13838119	esg-Dam-only
chr2L	14355894	14356894	esg-Dam-only
chr2L	14402921	14403921	esg-Dam-only
chr2L	15314624	15315624	esg-Dam-only
chr2L	15478069	15479069	esg-Dam-only
chr2R	22537588	22538588	esg-Dam-only
chrX	12576981	12577981	esg-Dam-only
chr2L	13511676	13512676	esg-Dam-only
chr3L	8684703	8685703	esg-Dam-only
chr3L	5352347	5353347	esg-Dam-only
chr3R	5761715	5762715	esg-Dam-only
chr3L	17535798	17536798	esg-Dam-only
chr3L	19618527	19619527	esg-Dam-only
chr3R	22685800	22686800	esg-Dam-only
chrX	19497118	19498118	esg-Dam-only
chrX	3868275	3869275	esg-Dam-only
chr2R	22397867	22398867	esg-Dam-only
chr2R	21192937	21193937	esg-Dam-only
chr3R	16009916	16010916	esg-Dam-only
chr3R	11200300	11201300	esg-Dam-only
chr3L	15692201	15693201	esg-Dam-only
chr3R	17706639	17707639	esg-Dam-only
chr3R	26012127	26013127	esg-Dam-only
chr2R	7984768	7985768	esg-Dam-only
chr2R	21042396	21043396	esg-Dam-only
chr2R	6245197	6246197	esg-Dam-only
chr3R	30201726	30202726	esg-Dam-only
chr3L	9713872	9714872	esg-Dam-only
chr2L	15332615	15333615	esg-Dam-only
chr2L	18985050	18986050	esg-Dam-only
chr3R	14568007	14569007	esg-Dam-only
chr2R	25008081	25009081	esg-Dam-only
chr2L	5255898	5256898	esg-Dam-only
chr3L	15527519	15528519	esg-Dam-only
chr2L	3305689	3306689	esg-Dam-only
chr2L	20779815	20780815	esg-Dam-only
chr3R	17055173	17056173	esg-Dam-only
chr2L	481240	482240	esg-Dam/rad21RNAi-only
chr2L	2858110	2859110	esg-Dam/rad21RNAi-only
chr2L	3061623	3062623	esg-Dam/rad21RNAi-only
chr2L	5145388	5146388	esg-Dam/rad21RNAi-only
chr2L	6078502	6079502	esg-Dam/rad21RNAi-only
chr2L	6085569	6086569	esg-Dam/rad21RNAi-only
chr2L	6454690	6455690	esg-Dam/rad21RNAi-only
chr2L	9744538	9745538	esg-Dam/rad21RNAi-only
chr3R	30356000	30357000	esg-Dam/rad21RNAi-only
chrX	11440167	11441167	esg-Dam/rad21RNAi-only
chr3L	1728892	1729892	esg-Dam/rad21RNAi-only
chr2R	12994359	12995359	esg-Dam/rad21RNAi-only
chrX	17120461	17121461	esg-Dam/rad21RNAi-only
chr2L	221894	222894	esg-Dam/rad21RNAi-only
chrX	14808773	14809773	esg-Dam/rad21RNAi-only
chr3L	8833594	8834594	esg-Dam/rad21RNAi-only
chrX	2536188	2537188	esg-Dam/rad21RNAi-only
chr2L	14021540	14022540	esg-Dam/rad21RNAi-only
chr2R	17098933	17099933	esg-Dam/rad21RNAi-only
chr2L	19573907	19574907	esg-Dam/rad21RNAi-only
chrX	7004751	7005751	esg-Dam/rad21RNAi-only
chr3R	6434428	6435428	esg-Dam/rad21RNAi-only
chrX	19847961	19848961	esg-Dam/rad21RNAi-only
chr3R	27573230	27574230	esg-Dam/rad21RNAi-only
chr2R	6961604	6962604	esg-Dam/rad21RNAi-only
chr3R	18197766	18198766	esg-Dam/rad21RNAi-only
chr3R	11948757	11949757	esg-Dam/rad21RNAi-only
chr2L	14384138	14385138	esg-Dam/rad21RNAi-only
chr2L	9691004	9692004	esg-Dam/rad21RNAi-only
chr3L	17534584	17535584	esg-Dam/rad21RNAi-only
chr3L	17511580	17512580	esg-Dam/rad21RNAi-only
chr3R	13685147	13686147	esg-Dam/rad21RNAi-only
chr3L	12391955	12392955	esg-Dam/rad21RNAi-only
chr3L	19871386	19872386	esg-Dam/rad21RNAi-only
chrX	2430641	2431641	esg-Dam/rad21RNAi-only
chrX	8200406	8201406	esg-Dam/rad21RNAi-only
chr3R	21199072	21200072	esg-Dam/rad21RNAi-only
chr3L	5186579	5187579	esg-Dam/rad21RNAi-only
chrX	6353435	6354435	esg-Dam/rad21RNAi-only
chr3R	5080980	5081980	esg-Dam/rad21RNAi-only
chrX	17485345	17486345	esg-Dam/rad21RNAi-only
chr3L	5783172	5784172	esg-Dam/rad21RNAi-only
chr2R	22544661	22545661	esg-Dam/rad21RNAi-only
chrX	10731774	10732774	esg-Dam/rad21RNAi-only
chr2L	19157405	19158405	esg-Dam/rad21RNAi-only
chr2L	2977043	2978043	esg-Dam/rad21RNAi-only
chr2L	492669	493669	esg-Dam/rad21RNAi-only
chr2R	11889929	11890929	esg-Dam/rad21RNAi-only
chr2L	11040938	11041938	esg-Dam/rad21RNAi-only
chr3R	30330073	30331073	esg-Dam/rad21RNAi-only
chr4	506983	507983	esg-Dam/rad21RNAi-only
chr2L	20880577	20881577	esg-Dam/rad21RNAi-only
chr2R	15612708	15613708	esg-Dam/rad21RNAi-only
chr2L	328860	329860	esg-Dam/rad21RNAi-only
chr2L	21163890	21164890	esg-Dam/rad21RNAi-only
chrX	12719949	12720949	esg-Dam/rad21RNAi-only
chr2L	161753	162753	esg-Dam/rad21RNAi-only
chrX	2292969	2293969	esg-Dam/rad21RNAi-only
chr2L	9514216	9515216	esg-Dam/rad21RNAi-only
chr2R	8060004	8061004	esg-Dam/rad21RNAi-only
chr3R	9883592	9884592	esg-Dam/rad21RNAi-only
chr2R	14283328	14284328	esg-Dam/rad21RNAi-only
chr2L	10478291	10479291	esg-Dam/rad21RNAi-only
chr3L	8696429	8697429	esg-Dam/rad21RNAi-only
chr3R	26569820	26570820	esg-Dam/rad21RNAi-only
chr3L	16149375	16150375	esg-Dam/rad21RNAi-only
chr2L	552111	553111	esg-Dam/rad21RNAi-only
chr3R	21853524	21854524	esg-Dam/rad21RNAi-only
chr2R	22631511	22632511	esg-Dam/rad21RNAi-only
chr3R	5322833	5323833	esg-Dam/rad21RNAi-only
chrX	17147947	17148947	esg-Dam/rad21RNAi-only
chr2L	12504907	12505907	esg-Dam/rad21RNAi-only
chr2R	14008026	14009026	esg-Dam/rad21RNAi-only
chr2L	3343753	3344753	esg-Dam/rad21RNAi-only
chrX	15525378	15526378	esg-Dam/rad21RNAi-only
chrX	19296829	19297829	esg-Dam/rad21RNAi-only
chr3R	14649448	14650448	esg-Dam/rad21RNAi-only
chr3R	17065903	17066903	esg-Dam/rad21RNAi-only
chr2R	9427171	9428171	esg-Dam/rad21RNAi-only
chrX	12755929	12756929	esg-Dam/rad21RNAi-only
chr3R	18243159	18244159	esg-Dam/rad21RNAi-only
chr2L	4997512	4998512	esg-Dam/rad21RNAi-only
chrX	1828601	1829601	esg-Dam/rad21RNAi-only
chr3R	16933673	16934673	esg-Dam/rad21RNAi-only
chr3R	16008615	16009615	esg-Dam/rad21RNAi-only
chr3L	10354920	10355920	esg-Dam/rad21RNAi-only
chrM	3443	4443	esg-Dam/rad21RNAi-only
chr3R	23411304	23412304	esg-Dam/rad21RNAi-only
chr2L	20083392	20084392	esg-Dam/rad21RNAi-only
chr2R	16813624	16814624	esg-Dam/rad21RNAi-only
chr2R	10769501	10770501	esg-Dam/rad21RNAi-only
chrX	18970768	18971768	esg-Dam/rad21RNAi-only
chr3L	14759336	14760336	esg-Dam/rad21RNAi-only
chr3R	12086472	12087472	esg-Dam/rad21RNAi-only
chr3R	13012088	13013088	esg-Dam/rad21RNAi-only
chrX	11500949	11501949	esg-Dam/rad21RNAi-only
chr3L	8985599	8986599	esg-Dam/rad21RNAi-only
chr3L	2756054	2757054	esg-Dam/rad21RNAi-only
chr2L	5867225	5868225	esg-Dam/rad21RNAi-only
chr2L	9123947	9124947	esg-Dam/rad21RNAi-only
chr2L	12479822	12480822	esg-Dam/rad21RNAi-only
chr3R	22669763	22670763	esg-Dam/rad21RNAi-only
chr2L	1585928	1586928	esg-Dam/rad21RNAi-only
chrX	8092226	8093226	esg-Dam/rad21RNAi-only
chr3L	8456162	8457162	esg-Dam/rad21RNAi-only
chr3L	21894590	21895590	esg-Dam/rad21RNAi-only
chrX	3746427	3747427	esg-Dam/rad21RNAi-only
chr3L	13252456	13253456	esg-Dam/rad21RNAi-only
chrX	2321269	2322269	esg-Dam/rad21RNAi-only
chr2R	10558614	10559614	esg-Dam/rad21RNAi-only
chrX	1264989	1265989	esg-Dam/rad21RNAi-only
chr2R	18529158	18530158	esg-Dam/rad21RNAi-only
chr2L	5874519	5875519	esg-Dam/rad21RNAi-only
chrX	2505348	2506348	esg-Dam/rad21RNAi-only
chr2R	24642818	24643818	esg-Dam/rad21RNAi-only
chr2L	17472224	17473224	esg-Dam/rad21RNAi-only
chr2L	16321218	16322218	esg-Dam/rad21RNAi-only
chr2R	18767354	18768354	esg-Dam/rad21RNAi-only
chr3L	15534912	15535912	esg-Dam/rad21RNAi-only
chr3R	30281805	30282805	esg-Dam/rad21RNAi-only
chrX	9109138	9110138	esg-Dam/rad21RNAi-only
chr3R	29488497	29489497	esg-Dam/rad21RNAi-only
chrX	10364526	10365526	esg-Dam/rad21RNAi-only
chr3R	8844281	8845281	esg-Dam/rad21RNAi-only
chr3L	511608	512608	esg-Dam/rad21RNAi-only
chr3L	14648303	14649303	esg-Dam/rad21RNAi-only
chr3L	4354586	4355586	esg-Dam/rad21RNAi-only
chr2L	9227488	9228488	esg-Dam/rad21RNAi-only
chr3R	17713595	17714595	esg-Dam/rad21RNAi-only
chr3R	6815503	6816503	esg-Dam/rad21RNAi-only
chr2L	5888612	5889612	esg-Dam/rad21RNAi-only
chr3L	2798118	2799118	esg-Dam/rad21RNAi-only
chr2L	16298771	16299771	esg-Dam/rad21RNAi-only
chr3R	5610550	5611550	esg-Dam/rad21RNAi-only
chrX	62238	63238	esg-Dam/rad21RNAi-only
chrX	7200032	7201032	esg-Dam/rad21RNAi-only
chr3L	14363273	14364273	esg-Dam/rad21RNAi-only
chr2L	11526091	11527091	esg-Dam/rad21RNAi-only
chr2L	8365503	8366503	esg-Dam/rad21RNAi-only
chr2R	16163018	16164018	esg-Dam/rad21RNAi-only
chrX	13087723	13088723	esg-Dam/rad21RNAi-only
chr3L	8682810	8683810	esg-Dam/rad21RNAi-only
chr2R	17842545	17843545	esg-Dam/rad21RNAi-only
chr2L	13835463	13836463	esg-Dam/rad21RNAi-only
chr3R	21625393	21626393	esg-Dam/rad21RNAi-only
chr3L	11274406	11275406	esg-Dam/rad21RNAi-only
chrX	13894009	13895009	esg-Dam/rad21RNAi-only
chr3L	1585222	1586222	esg-Dam/rad21RNAi-only
chr2L	7525483	7526483	esg-Dam/rad21RNAi-only
chr2R	21480395	21481395	esg-Dam/rad21RNAi-only
chr3R	11757544	11758544	esg-Dam/rad21RNAi-only
chr2L	19951780	19952780	esg-Dam/rad21RNAi-only
chr2R	24678738	24679738	esg-Dam/rad21RNAi-only
chr3L	11294711	11295711	esg-Dam/rad21RNAi-only
chr3R	10379472	10380472	esg-Dam/rad21RNAi-only
chr3L	14756042	14757042	esg-Dam/rad21RNAi-only
chrX	19364452	19365452	esg-Dam/rad21RNAi-only
chr2R	7047915	7048915	esg-Dam/rad21RNAi-only
chr2R	11602207	11603207	esg-Dam/rad21RNAi-only
chr3L	9054862	9055862	esg-Dam/rad21RNAi-only
chrX	1614768	1615768	esg-Dam/rad21RNAi-only
chr2R	10022732	10023732	esg-Dam/rad21RNAi-only
chr2R	6142372	6143372	esg-Dam/rad21RNAi-only
chr2R	7529539	7530539	esg-Dam/rad21RNAi-only
chr3L	8582488	8583488	esg-Dam/rad21RNAi-only
chr2R	18410985	18411985	esg-Dam/rad21RNAi-only
chr2L	18622428	18623428	esg-Dam/rad21RNAi-only
chrX	15551681	15552681	esg-Dam/rad21RNAi-only
chr2R	22119581	22120581	esg-Dam/rad21RNAi-only
chr3R	15963206	15964206	esg-Dam/rad21RNAi-only
chr3L	3518353	3519353	esg-Dam/rad21RNAi-only
chr3L	3229878	3230878	esg-Dam/rad21RNAi-only
chrX	11119028	11120028	esg-Dam/rad21RNAi-only
chr2R	15245174	15246174	esg-Dam/rad21RNAi-only
chr3R	20556128	20557128	esg-Dam/rad21RNAi-only
chr2R	7405756	7406756	esg-Dam/rad21RNAi-only
chr2R	22135531	22136531	esg-Dam/rad21RNAi-only
chr3L	18889880	18890880	esg-Dam/rad21RNAi-only
chr2R	7253454	7254454	esg-Dam/rad21RNAi-only
chr3L	21171079	21172079	esg-Dam/rad21RNAi-only
chr2L	21308420	21309420	esg-Dam/rad21RNAi-only
chr2L	5797977	5798977	esg-Dam/rad21RNAi-only
chr3L	2150142	2151142	esg-Dam/rad21RNAi-only
chr2R	6506703	6507703	esg-Dam/rad21RNAi-only
chr2L	18458615	18459615	esg-Dam/rad21RNAi-only
chr2L	20311029	20312029	esg-Dam/rad21RNAi-only
chrX	19642685	19643685	esg-Dam/rad21RNAi-only
chrX	4672024	4673024	esg-Dam/rad21RNAi-only
chrX	21589287	21590287	esg-Dam/rad21RNAi-only
chr3R	9338444	9339444	esg-Dam/rad21RNAi-only
chr3R	11656262	11657262	esg-Dam/rad21RNAi-only
chr2R	20129776	20130776	esg-Dam/rad21RNAi-only
chr3L	12074153	12075153	esg-Dam/rad21RNAi-only
chr2R	10781581	10782581	esg-Dam/rad21RNAi-only
chr2L	10557881	10558881	esg-Dam/rad21RNAi-only
chr3R	8810930	8811930	esg-Dam/rad21RNAi-only
chr2L	8691700	8692700	esg-Dam/rad21RNAi-only
chrX	10109493	10110493	esg-Dam/rad21RNAi-only
chrX	900764	901764	esg-Dam/rad21RNAi-only
chr2R	9443433	9444433	esg-Dam/rad21RNAi-only
chr3L	18821194	18822194	esg-Dam/rad21RNAi-only
chr3L	13226594	13227594	esg-Dam/rad21RNAi-only
chr3R	16229727	16230727	esg-Dam/rad21RNAi-only
chr3R	26211714	26212714	esg-Dam/rad21RNAi-only
chr3L	22006563	22007563	esg-Dam/rad21RNAi-only
chr2L	3941850	3942850	esg-Dam/rad21RNAi-only
chr2R	22084874	22085874	esg-Dam/rad21RNAi-only
chrX	2301285	2302285	esg-Dam/rad21RNAi-only
chr3R	20836031	20837031	esg-Dam/rad21RNAi-only
chrX	1964793	1965793	esg-Dam/rad21RNAi-only
chrX	7229269	7230269	esg-Dam/rad21RNAi-only
chr2R	24963719	24964719	esg-Dam/rad21RNAi-only
chr3R	29781756	29782756	esg-Dam/rad21RNAi-only
chr3L	1100898	1101898	esg-Dam/rad21RNAi-only
chr2L	9510334	9511334	esg-Dam/rad21RNAi-only
chr2L	17376904	17377904	esg-Dam/rad21RNAi-only
chr3R	11639211	11640211	esg-Dam/rad21RNAi-only
chr2R	9880848	9881848	esg-Dam/rad21RNAi-only
chr3R	9873430	9874430	esg-Dam/rad21RNAi-only
chr3R	30276645	30277645	esg-Dam/rad21RNAi-only
chr3R	5041600	5042600	esg-Dam/rad21RNAi-only
chr2R	13953066	13954066	esg-Dam/rad21RNAi-only
chrX	18277292	18278292	esg-Dam/rad21RNAi-only
chr3R	5101902	5102902	esg-Dam/rad21RNAi-only
chr3L	4107359	4108359	esg-Dam/rad21RNAi-only
chr2L	12467145	12468145	esg-Dam/rad21RNAi-only
chr3R	10145754	10146754	esg-Dam/rad21RNAi-only
chrX	3186480	3187480	esg-Dam/rad21RNAi-only
chrX	3873396	3874396	esg-Dam/rad21RNAi-only
chr3R	17709200	17710200	esg-Dam/rad21RNAi-only
chr3L	21889349	21890349	esg-Dam/rad21RNAi-only
chrX	2288940	2289940	esg-Dam/rad21RNAi-only
chr3R	9592172	9593172	esg-Dam/rad21RNAi-only
chr2R	10324292	10325292	esg-Dam/rad21RNAi-only
chr2L	20906570	20907570	esg-Dam/rad21RNAi-only
chr3L	16409222	16410222	esg-Dam/rad21RNAi-only
chrX	4939097	4940097	esg-Dam/rad21RNAi-only
chrX	19669306	19670306	esg-Dam/rad21RNAi-only
chrX	57790	58790	esg-Dam/rad21RNAi-only
chr2L	6081760	6082760	esg-Dam/rad21RNAi-only
chr3L	9854283	9855283	esg-Dam/rad21RNAi-only
chr3R	14712879	14713879	esg-Dam/rad21RNAi-only
chrX	18092062	18093062	esg-Dam/rad21RNAi-only
chr2L	9133742	9134742	esg-Dam/rad21RNAi-only
chr3R	5861745	5862745	esg-Dam/rad21RNAi-only
chr3L	6569482	6570482	esg-Dam/rad21RNAi-only
chr3R	17705074	17706074	esg-Dam/rad21RNAi-only
chr2R	6672650	6673650	esg-Dam/rad21RNAi-only
chr2R	19205396	19206396	esg-Dam/rad21RNAi-only
chr2R	23427714	23428714	esg-Dam/rad21RNAi-only
chr3R	31071793	31072793	esg-Dam/rad21RNAi-only
chr2L	2898893	2899893	esg-Dam/rad21RNAi-only
chr3L	3403520	3404520	esg-Dam/rad21RNAi-only
chrX	1375143	1376143	esg-Dam/rad21RNAi-only
chr3L	17916963	17917963	esg-Dam/rad21RNAi-only
chr3R	10242146	10243146	esg-Dam/rad21RNAi-only
chr2L	19789446	19790446	esg-Dam/rad21RNAi-only
chrX	8419506	8420506	esg-Dam/rad21RNAi-only
chr2L	16268838	16269838	esg-Dam/rad21RNAi-only
chr2L	19064098	19065098	esg-Dam/rad21RNAi-only
chr2L	19186986	19187986	esg-Dam/rad21RNAi-only
chr2R	6629961	6630961	esg-Dam/rad21RNAi-only
chr2R	10871481	10872481	esg-Dam/rad21RNAi-only
chr2R	11633629	11634629	esg-Dam/rad21RNAi-only
chr2R	13585800	13586800	esg-Dam/rad21RNAi-only
chr2R	13927985	13928985	esg-Dam/rad21RNAi-only
chr2R	14085583	14086583	esg-Dam/rad21RNAi-only
chr2R	16381090	16382090	esg-Dam/rad21RNAi-only
chr2R	16589843	16590843	esg-Dam/rad21RNAi-only
chr2R	17597630	17598630	esg-Dam/rad21RNAi-only
chr2R	18330009	18331009	esg-Dam/rad21RNAi-only
chr2R	21713599	21714599	esg-Dam/rad21RNAi-only
chr3L	129550	130550	esg-Dam/rad21RNAi-only
chr3L	786256	787256	esg-Dam/rad21RNAi-only
chr3L	4102287	4103287	esg-Dam/rad21RNAi-only
chr3L	6711248	6712248	esg-Dam/rad21RNAi-only
chr3L	6962447	6963447	esg-Dam/rad21RNAi-only
chr3L	10679604	10680604	esg-Dam/rad21RNAi-only
chr3L	11245873	11246873	esg-Dam/rad21RNAi-only
chr3L	14004378	14005378	esg-Dam/rad21RNAi-only
chr3L	14272712	14273712	esg-Dam/rad21RNAi-only
chr3L	14780382	14781382	esg-Dam/rad21RNAi-only
chr3L	20517504	20518504	esg-Dam/rad21RNAi-only
chr3L	21024471	21025471	esg-Dam/rad21RNAi-only
chr3L	21413883	21414883	esg-Dam/rad21RNAi-only
chr3R	9351418	9352418	esg-Dam/rad21RNAi-only
chr3R	10387751	10388751	esg-Dam/rad21RNAi-only
chr3R	11648695	11649695	esg-Dam/rad21RNAi-only
chr3R	14287766	14288766	esg-Dam/rad21RNAi-only
chr3R	16278915	16279915	esg-Dam/rad21RNAi-only
chr3R	18396136	18397136	esg-Dam/rad21RNAi-only
chr3R	20544962	20545962	esg-Dam/rad21RNAi-only
chr3R	21608135	21609135	esg-Dam/rad21RNAi-only
chr3R	23220677	23221677	esg-Dam/rad21RNAi-only
chr3R	24653605	24654605	esg-Dam/rad21RNAi-only
chr3R	26549015	26550015	esg-Dam/rad21RNAi-only
chr3R	31222987	31223987	esg-Dam/rad21RNAi-only
chrM	8158	9158	esg-Dam/rad21RNAi-only
chrX	278351	279351	esg-Dam/rad21RNAi-only
chrX	655090	656090	esg-Dam/rad21RNAi-only
chrX	800652	801652	esg-Dam/rad21RNAi-only
chrX	1949543	1950543	esg-Dam/rad21RNAi-only
chrX	3371064	3372064	esg-Dam/rad21RNAi-only
chrX	3447108	3448108	esg-Dam/rad21RNAi-only
chrX	4563844	4564844	esg-Dam/rad21RNAi-only
chrX	7698606	7699606	esg-Dam/rad21RNAi-only
chrX	8520863	8521863	esg-Dam/rad21RNAi-only
chrX	9581141	9582141	esg-Dam/rad21RNAi-only
chrX	10087437	10088437	esg-Dam/rad21RNAi-only
chrX	10368780	10369780	esg-Dam/rad21RNAi-only
chrX	12752207	12753207	esg-Dam/rad21RNAi-only
chrX	13226256	13227256	esg-Dam/rad21RNAi-only
chrX	13277624	13278624	esg-Dam/rad21RNAi-only
chrX	13567965	13568965	esg-Dam/rad21RNAi-only
chrX	13993407	13994407	esg-Dam/rad21RNAi-only
chrX	15869840	15870840	esg-Dam/rad21RNAi-only
chrX	17300411	17301411	esg-Dam/rad21RNAi-only
chrX	19166565	19167565	esg-Dam/rad21RNAi-only
chrX	21313303	21314303	esg-Dam/rad21RNAi-only
chr2L	4372886	4373886	esg-Dam/rad21RNAi-only
chrX	3294067	3295067	esg-Dam/rad21RNAi-only
chr3L	9676644	9677644	esg-Dam/rad21RNAi-only
chrX	2590504	2591504	esg-Dam/rad21RNAi-only
chr3L	446698	447698	esg-Dam/rad21RNAi-only
chr2R	18689119	18690119	esg-Dam/rad21RNAi-only
chrX	1666426	1667426	esg-Dam/rad21RNAi-only
chr3L	17007244	17008244	esg-Dam/rad21RNAi-only
chrX	12661154	12662154	esg-Dam/rad21RNAi-only

## Sheet: idr_esg-dam (Rad21-) Peaks
chrom	start	end	FBID	symbol
chr2L	477267	486214	FBgn0267991	CR46258
chr2L	2195566	2204137	FBgn0085201	CG34172
chr2L	2856410	2860810	FBgn0031474	CG2991
chr2L	3061556	3062690	FBgn0283427	CG3523
chr2L	5144674	5147103	FBgn0261836	CG42768
chr2L	6077186	6080819	FBgn0031778	CR9162
chr2L	6084301	6087838	FBgn0266450	CG45074
chr2L	6453838	6456543	FBgn0031815	CG9526
chr2L	9743453	9746623	FBgn0028704	CG18660
chr2L	16266579	16272098	FBgn0002673	CG4965
chr2L	19063609	19065587	FBgn0032752	CG10702
chr2L	19185866	19189106	FBgn0267726	CG46059
chr2R	6627847	6633075	FBgn0042085	CG3274
chr2R	7689846	7695854	FBgn0033212	CG1399
chr2R	10475430	10478850	FBgn0261862	CG12891
chr2R	10870955	10873007	FBgn0050015	CG30015
chr2R	11627579	11640679	FBgn0033638	CG9005
chr2R	12586612	12592744	FBgn0022764	CG8815
chr2R	13584087	13588514	FBgn0027581	CG6191
chr2R	13927130	13929840	FBgn0013733	CG18076
chr2R	14083573	14088594	FBgn0259183	CG42287
chr2R	16380661	16382519	FBgn0266856	CR45317
chr2R	16589702	16590985	FBgn0034141	CG8311
chr2R	17597136	17599124	FBgn0034251	CG11423
chr2R	18328166	18332852	FBgn0285917	CG5580
chr2R	18811792	18815613	FBgn0010551	CG15081
chr2R	21287971	21289015	FBgn0016726	CG10071
chr2R	21712665	21715534	FBgn0050403	CG30403
chr3L	127236	132865	FBgn0266950	CR45401
chr3L	783687	789826	NA	NA
chr3L	4101266	4104309	FBgn0028484	CG14992
chr3L	6710687	6712809	NA	NA
chr3L	6961723	6964171	FBgn0035722	CG10075
chr3L	10676307	10683902	FBgn0010762	CG32067
chr3L	11243544	11249203	FBgn0265926	CR44715
chr3L	12075820	12082788	FBgn0284221	CG5661
chr3L	14002403	14007353	FBgn0036398	CG9007
chr3L	14271312	14275113	FBgn0001085	CG17697
chr3L	14779542	14782222	FBgn0036450	CG13472
chr3L	20516124	20519884	FBgn0037008	CG5047
chr3L	21023380	21026563	FBgn0037044	CG10585
chr3L	21412082	21416685	FBgn0261258	CG6014
chr3L	22833660	22836683	FBgn0266977	CG45428
chr3R	9350060	9353776	FBgn0086053	CR34682
chr3R	10387045	10389457	FBgn0259938	CG17100
chr3R	11647632	11650758	FBgn0037926	CG10535
chr3R	14285204	14291329	FBgn0285913	CG12207
chr3R	16275003	16283827	FBgn0250823	CG6963
chr3R	18395121	18398151	FBgn0028670	CG18617
chr3R	20542648	20548276	FBgn0016917	CG4257
chr3R	21603532	21613738	FBgn0283499	CG18402
chr3R	23219079	23223275	FBgn0262975	CG43286
chr3R	24653748	24654462	FBgn0039215	CG6695
chr3R	26547027	26552003	FBgn0267753	CR46084
chr3R	31221583	31225391	FBgn0263544	CR43529
chrM	6203	11113	NA	NA
chrX	277634	280068	FBgn0005427	CG3114
chrX	654169	657012	FBgn0025637	CG16983
chrX	800171	802134	FBgn0260855	CG7359
chrX	1387866	1389764	FBgn0024985	CG11448
chrX	1946556	1953530	FBgn0264562	CG43934
chrX	3368040	3375088	FBgn0266350	CR44999
chrX	3446219	3448997	FBgn0029657	CG12535
chrX	3673487	3678746	FBgn0023215	CG13316
chrX	4563122	4565567	FBgn0052773	CR32773
chrX	6601558	6605379	FBgn0029881	CG3973
chrX	7696271	7701941	FBgn0029504	CG12690
chrX	8520268	8522459	FBgn0264975	CG1634
chrX	9580465	9582818	FBgn0001186	CG3001
chrX	10086428	10089446	FBgn0030178	CG2974
chrX	10368147	10370414	FBgn0052679	CG32679
chrX	10738591	10742905	FBgn0265987	CR44766
chrX	12751590	12753825	FBgn0265830	CR44619
chrX	13225485	13228027	FBgn0004456	CG1771
chrX	13276683	13279565	FBgn0041210	CG1770
chrX	13566211	13570719	FBgn0284227	CG46311
chrX	13992753	13995061	FBgn0267033	CG45477
chrX	15043262	15047414	FBgn0030603	CG5541
chrX	15868817	15871863	FBgn0001092	CG8893
chrX	17298925	17302897	FBgn0030838	CG5445
chrX	17877403	17879877	FBgn0030881	CG12985
chrX	19166021	19168110	FBgn0261461	CG42274
chrX	21313065	21314541	FBgn0020369	CG1489
chr2R	12928316	12929071	FBgn0033782	CG3850
chr3L	9694293	9697272	FBgn0015321	CG8284
chr2L	4371863	4374909	FBgn0266903	CR45363
chrX	3292405	3296730	FBgn0000479	CG32498
chr3R	23722475	23727536	FBgn0002922	CG10250
chr2R	14289392	14291497	FBgn0263397	CG8585
chr3R	23225508	23227669	FBgn0262975	CG43286
chr3L	9674306	9679983	FBgn0016081	CG32045
chrX	2588036	2593973	FBgn0040375	CG13760
chr3L	445716	448680	FBgn0001316	CG17046
chr2R	18686281	18692957	FBgn0265625	CG44433
chrX	1666345	1667507	FBgn0000482	CG3093
chr3L	3121289	3126980	FBgn0052273	CR32273
chr3L	17003521	17011968	FBgn0036684	CG3764
chrX	12659620	12663688	FBgn0011837	CG4070
chrX	2193594	2195112	FBgn0023549	CG3456
chr3R	30351720	30361281	FBgn0010113	CG15532
chrX	11439580	11441755	FBgn0030300	CG1747
chr3R	16243360	16249125	FBgn0040071	CG6889
chr3L	1727392	1731392	FBgn0035264	CG2069
chrX	4321939	4326658	FBgn0040907	CG3712
chrX	10716946	10720693	FBgn0052676	CG32676
chr2R	12990291	12999427	FBgn0265623	CG3905
chrX	17118971	17122952	FBgn0260748	CG5004
chr3R	22523516	22528627	FBgn0038981	CG5346
chrX	10771979	10775632	FBgn0052672	CG32672
chr2L	218515	226274	FBgn0265153	CR44222
chrX	14808117	14810430	FBgn0003301	CG9533
chr3L	8832457	8835731	FBgn0052026	CG32026
chrX	2535628	2537749	FBgn0284408	CG33950
chr2L	14020973	14023108	FBgn0266892	CR45352
chrX	2120204	2124750	FBgn0004860	CG3895
chr2R	17097829	17101038	FBgn0010226	CG8938
chr3L	11169288	11171173	FBgn0264721	CR43989
chrX	19152776	19155687	FBgn0261461	CG42274
chr3L	779629	783545	NA	NA
chr2L	19570877	19577937	FBgn0005672	CG10334
chrX	7004073	7006430	FBgn0027108	CG4590
chr3R	20828712	20831139	FBgn0027493	CG17273
chr3R	6432294	6437562	FBgn0264495	CG42803
chrX	19846973	19849949	FBgn0031078	CG11943
chr3R	27568016	27579445	FBgn0027492	CG5643
chr2R	16579343	16580805	FBgn0034140	CG8317
chr2R	11201786	11208501	FBgn0003396	CG7734
chr2R	6961114	6963094	FBgn0066292	CG33350
chr3R	18196281	18200251	FBgn0038579	CG14313
chr3R	5214839	5217683	FBgn0259212	CG42312
chr3R	11948274	11950241	FBgn0051211	CG31211
chr2L	14383519	14385757	FBgn0020258	CG3478
chr2L	9690233	9692775	FBgn0000273	CG4379
chr3L	17531021	17539148	FBgn0259174	CG42279
chr3L	17510954	17513206	FBgn0036733	CG6322
chr3R	13684384	13686910	FBgn0038168	CG9591
chr3L	12389286	12395625	FBgn0036279	CG4357
chr3L	19870465	19873308	FBgn0262518	CG8287
chr3L	9126301	9130993	FBgn0011206	CG4760
chrX	9644884	9646882	FBgn0028341	CG32697
chr2L	15490427	15497537	FBgn0266831	CR45293
chrX	2430232	2432050	FBgn0001150	CG7952
chrX	8198824	8202989	FBgn0261873	CG32717
chr3R	21197701	21201443	FBgn0264357	CG17299
chr3L	5185569	5188590	FBgn0052423	CG32423
chrX	6352560	6355311	FBgn0029868	CG3446
chr3R	5078715	5084246	FBgn0010313	CG2530
chrX	17483829	17487861	FBgn0263706	CG43658
chr3L	5783362	5783983	FBgn0044419	CG33718
chr2R	22540951	22549371	FBgn0003175	CG4444
chr3L	13484195	13487282	FBgn0036373	CG10741
chr3R	10097432	10099638	FBgn0262419	CR42968
chrX	10729525	10735024	FBgn0052676	CG32676
chr2L	19155215	19160595	FBgn0010300	CG10719
chr2L	2975987	2979099	FBgn0031483	CG9641
chr2L	491797	494542	FBgn0267991	CR46258
chr2R	11889324	11891535	FBgn0033663	CG8983
chr2R	13545383	13547983	FBgn0033853	CG6145
chr2L	11040067	11042809	FBgn0032330	CG31868
chr3R	30328849	30332298	FBgn0010113	CG15532
chr4	504469	510498	FBgn0004607	CG1449
chr2R	12925619	12928157	FBgn0033782	CG3850
chr2L	20878017	20884137	FBgn0263996	CG43739
chr2R	15610651	15615765	FBgn0260429	CG42524
chr2L	328688	330033	FBgn0051921	CG31921
chr2L	21162731	21166049	FBgn0032924	CG9247
chrX	12718584	12722314	FBgn0265523	CG4013
chr2L	159793	164713	FBgn0053635	CG33635
chrX	2292440	2294499	FBgn0023526	CG2865
chr2L	9513535	9515898	FBgn0032120	CG33298
chr2R	8058596	8062413	FBgn0033252	CG12769
chr3R	9882427	9885758	FBgn0266389	CR45029
chrX	2352589	2355582	FBgn0003159	CG2841
chrX	9192992	9193460	FBgn0030100	CG12106
chr2R	14282797	14284859	FBgn0263397	CG8585
chr2L	10477586	10479997	FBgn0032256	CG6187
chr2R	6131219	6135449	FBgn0033063	CG14589
chr3L	8696034	8697824	NA	NA
chr3R	26567296	26573344	FBgn0263289	CG43398
chr3L	16149274	16150476	FBgn0036576	CG5151
chr2L	552450	552772	FBgn0005660	CG2914
chr3R	21852514	21855534	FBgn0015229	CG6575
chr2R	22631604	22632418	FBgn0053143	CG33143
chr3L	8691011	8692930	FBgn0265719	CR44526
chr3R	5320205	5326462	FBgn0013576	CG32464
chrX	17147121	17149773	FBgn0083041	CR34600
chr2L	12504156	12506659	FBgn0259176	CG42281
chrX	21064212	21065621	FBgn0031150	CG32513
chr2R	14007301	14009752	FBgn0002643	CG8118
chr2L	3342910	3345596	FBgn0020445	CG3327
chr2R	24748923	24751452	FBgn0050421	CG30421
chr2L	124505	132721	FBgn0001142	CG2718
chrX	15523298	15528458	FBgn0022710	CG9210
chrX	10838652	10840694	FBgn0003321	CG1664
chrX	1384042	1386506	FBgn0024986	CG3719
chrX	19296255	19298403	FBgn0031011	CG8034
chr2L	7676235	7678954	FBgn0264087	CG43756
chr3R	14648955	14650942	FBgn0086686	CG7832
chr3R	15195902	15199337	FBgn0038296	CG6752
chrX	2134474	2139119	FBgn0004861	CG18412
chr3R	17064163	17068644	FBgn0038474	CG5184
chr2R	9425867	9429475	FBgn0033413	CG8806
chrX	12754907	12757952	FBgn0020513	CG3989
chr2R	21645150	21649320	FBgn0034644	CG10082
chr3R	18242034	18245284	FBgn0020238	CG31196
chr2L	4995773	5000251	FBgn0053113	CG33113
chr3L	543201	551593	FBgn0267982	CR46249
chrX	1825906	1832297	FBgn0029590	CG14811
chr3R	26917132	26919503	FBgn0004510	CG6338
chr3R	16933292	16935055	FBgn0000015	CG11648
chr3R	16007839	16010391	FBgn0038391	CG10278
chr3L	10353218	10357623	FBgn0267668	CR46006
chrM	2148	5738	NA	NA
chr3R	23410226	23413383	FBgn0039078	CG4374
chr2L	20082106	20085678	FBgn0004374	CG10718
chr3L	22886778	22889260	FBgn0037203	CG11128
chr2R	16812561	16815687	FBgn0034160	CG5550
chr3R	11809845	11814655	FBgn0019624	CG14724
chrX	19318324	19323016	FBgn0259834	CG8062
chr2R	10767219	10772784	FBgn0053144	CG33144
chrX	18968672	18973864	FBgn0264090	CG43759
chr3L	14758833	14760840	FBgn0260233	CG42507
chr3R	21895295	21899999	FBgn0038917	CG6678
chr3R	12084473	12089471	FBgn0037989	CG14741
chr3R	13010941	13014236	FBgn0020496	CG7583
chrX	11500335	11502563	FBgn0052666	CG32666
chr3L	19790110	19794224	FBgn0261283	CG8522
chr3L	8984828	8987370	FBgn0263199	CG5288
chr3L	2755231	2757877	FBgn0052296	CG32296
chr2L	5864021	5871430	FBgn0031745	CG8965
chr2L	9121940	9126954	FBgn0052982	CG32982
chr2L	12475034	12485611	FBgn0259176	CG42281
chr3R	22667106	22673421	FBgn0266418	CG45058
chr3R	9417489	9419784	FBgn0261552	CG42670
chr3R	24228942	24232650	FBgn0039169	CG5669
chr2R	13922923	13925822	FBgn0013733	CG18076
chr2L	1586210	1586646	FBgn0261509	CG14351
chr2R	8194574	8197810	FBgn0053087	CG33087
chrX	8091117	8094335	FBgn0029995	CG2256
chr3L	763738	767668	FBgn0052481	CR32481
chr3L	8698441	8700712	NA	NA
chr3R	4910697	4916860	FBgn0265082	CG44193
chrX	20253215	20254934	FBgn0031099	CG17065
chr3L	8453982	8459343	FBgn0010825	CG6964
chr3R	30268479	30275613	FBgn0010113	CG15532
chr3L	21893467	21896713	FBgn0262737	CG7437
chrX	3744392	3749462	FBgn0283657	CG34412
chrX	15787058	15789092	FBgn0026374	CG8497
chr3L	13251310	13254602	FBgn0052119	CG32119
chr2R	10853723	10856682	FBgn0050015	CG30015
chrX	6996929	6999033	FBgn0027108	CG4590
chrX	15811566	15814426	FBgn0003345	CG8544
chrX	2320426	2323112	FBgn0040391	CG2854
chr3L	3245113	3248553	FBgn0263617	CR43626
chr2R	10557132	10561096	FBgn0263102	CG2368
chrX	1264208	1266771	FBgn0028550	CG11405
chr2R	18527051	18532265	FBgn0034356	CG10924
chr3R	4991176	5000145	FBgn0037292	CG2022
chr2L	5873747	5876291	FBgn0031745	CG8965
chrX	2503433	2508264	FBgn0284408	CG33950
chr2L	2748922	2753500	FBgn0031451	CG9961
chr3L	14986047	14988750	FBgn0002778	CG3297
chrX	15500722	15503896	FBgn0027287	CG33206
chr2R	24642106	24644531	FBgn0035043	CG4781
chr3R	9955422	9959755	FBgn0267336	CG34360
chr2L	17471755	17473693	FBgn0000183	CG6605
chrX	16281458	16282954	FBgn0000536	CG3525
chr3R	10083844	10086039	FBgn0266414	CR45054
chr3L	648795	649797	FBgn0035147	CG12030
chr2L	16320404	16323032	FBgn0014092	CG4278
chr2R	18764848	18770860	FBgn0050229	CR30229
chr3L	15534373	15536451	FBgn0262893	CG43248
chr3R	30281180	30283431	FBgn0010113	CG15532
chrX	9108733	9110544	FBgn0030089	CG9113
chr2R	16581410	16583546	FBgn0034140	CG8317
chr3R	20261020	20266636	FBgn0262582	CG43122
chr3R	29488159	29489836	FBgn0039666	CG11501
chrX	10363687	10366366	FBgn0028331	CG2221
chr2R	7149135	7151120	FBgn0003090	CG11084
chr3R	8842835	8846728	FBgn0262614	CG43140
chr3L	511236	512980	FBgn0001316	CG17046
chrX	6858075	6861994	FBgn0029915	CG14434
chr3R	5516781	5518075	FBgn0010399	CG2902
chr3L	20731437	20734942	FBgn0264573	CR43945
chr3L	14646725	14650882	FBgn0041604	CG32146
chr3L	4352813	4357360	FBgn0035533	CG15015
chr2L	9225283	9230693	FBgn0041092	CG13109
chr2L	12719190	12722327	FBgn0032455	CG5792
chr3R	17712347	17715843	FBgn0261885	CG7467
chr3R	6811649	6820358	FBgn0000003	CR32864
chrX	19667162	19669427	FBgn0004057	CG12529
chr3R	8356025	8359747	FBgn0037584	CG7963
chr2L	5887147	5891077	FBgn0265788	CR44577
chr3L	2795837	2801400	FBgn0263392	CG43444
chr2L	16298851	16299692	FBgn0028375	CG5876
chr2R	15674887	15676599	FBgn0266636	CR45143
chr3R	5610060	5612041	FBgn0019637	CG1433
chrX	61578	63898	NA	NA
chrX	2456500	2458957	FBgn0040388	CG32796
chrX	13640197	13642461	FBgn0030505	CG11172
chr2L	16520920	16525062	FBgn0032587	CG5953
chrX	7199189	7201875	FBgn0029939	CG9650
chr3L	14361324	14366222	FBgn0001085	CG17697
chr2L	11524306	11528876	FBgn0262683	CG43153
chr2L	8365215	8366792	FBgn0032029	CG17292
chr2R	16162433	16164604	FBgn0034083	CG8434
chr3L	17971612	17973538	FBgn0000568	CG8127
chr3L	8056126	8060138	FBgn0026263	CG7574
chrX	13086895	13089551	FBgn0261524	CG12244
chr3L	8681196	8685424	NA	NA
chr2R	17841603	17844487	FBgn0041585	CG11430
chr2L	13834511	13837415	FBgn0064115	CG33649
chr3R	21625532	21626255	FBgn0262434	CR42992
chr3R	9502038	9504197	FBgn0014380	CG9366
chrX	19752041	19754545	FBgn0031069	CG12703
chr3L	9501016	9505695	FBgn0267534	CR45874
chr3L	11274011	11275802	FBgn0265931	CR44720
chrX	13893356	13895663	FBgn0267033	CG45477
chr3L	1584654	1586791	FBgn0035237	CG13917
chrX	2049558	2050539	FBgn0025631	CG4322
chr3L	1098409	1099117	FBgn0004870	CG9097
chr2L	7524185	7527782	FBgn0264895	CG44086
chr2L	857752	858635	FBgn0262177	CR42884
chr2R	21478982	21482808	FBgn0010415	CG10497
chr2L	6682918	6685202	FBgn0031849	CG11327
chr3R	11756168	11759920	FBgn0017581	CG17342
chr2L	19950817	19953744	FBgn0263873	CG43720
chr2R	24677622	24680854	FBgn0035049	CG4859
chr3L	11294362	11296060	FBgn0036152	CG6175
chr3L	3208398	3209531	FBgn0035416	NA
chr3R	10378605	10381339	FBgn0020379	CG6312
chr3R	9927047	9929235	FBgn0267336	CG34360
chr3L	6253510	6256919	FBgn0035696	CG10173
chr3L	14754450	14758635	FBgn0260233	CG42507
chrX	19359513	19370391	FBgn0031016	CG12199
chr2R	7046809	7050021	FBgn0033136	CG12838
chr2R	11598700	11606715	FBgn0033636	CG10897
chr3L	9052792	9057932	FBgn0000116	CG32031
chrX	1613900	1616636	FBgn0283451	CG11491
chr3L	9357425	9359624	FBgn0085485	CG34456
chr2R	10021171	10025293	FBgn0033473	CG12128
chr2R	6139355	6146389	FBgn0011958	CR30304
chr2R	23569032	23573540	FBgn0015903	CG5393
chr2R	7528321	7531758	FBgn0033190	CG2137
chr3L	8581618	8584359	FBgn0262508	CG43078
chr3R	21856048	21858006	FBgn0015229	CG6575
chr3L	70541	74277	FBgn0262680	CR43150
chr2R	18409740	18413230	FBgn0013983	CG5576
chr3R	5316531	5320136	FBgn0013576	CG32464
chr2L	18621025	18624832	FBgn0032694	CG15162
chrX	15550692	15553670	FBgn0265453	CR44353
chr2R	22117471	22122691	FBgn0002715	CG5303
chr2R	17085900	17088134	FBgn0050460	CG30460
chr3R	15963190	15964223	FBgn0038388	CG4287
chr3R	16986249	16988768	FBgn0266748	CR45221
chr2L	865263	868451	FBgn0086031	CR34660
chr3L	12406942	12410690	FBgn0052103	CG32103
chrX	15069354	15071932	FBgn0264389	CG9053
chr3R	5764042	5765949	FBgn0027608	CG2082
chr3L	3045773	3047536	FBgn0052485	CG32485
chr3L	3516304	3521402	FBgn0005640	CG10579
chr3L	3229041	3231715	FBgn0035424	CG11505
chrX	11119094	11119962	FBgn0030266	CG11122
chr2R	15243750	15247599	FBgn0003328	NA
chr3R	20554101	20559155	FBgn0067782	CG33488
chr3R	25739170	25740970	FBgn0051092	CG31092
chr2R	24985303	24987231	FBgn0010435	CG2727
chr2R	7404399	7408114	FBgn0033166	CG11166
chr2R	22134398	22137664	FBgn0000008	CG6741
chr3L	18888169	18892591	FBgn0036821	CG3961
chr2R	7252207	7255701	FBgn0266818	CR45280
chr3L	21169583	21173576	FBgn0021760	CG32435
chr2L	21307358	21310483	FBgn0000370	CG8669
chr2L	5796329	5800626	FBgn0031741	CG11034
chr2R	15742548	15746978	FBgn0050089	CG30089
chr3L	2149513	2151771	FBgn0052311	CG33484
chr2R	6504257	6510149	FBgn0266620	CR45127
chr3L	7094552	7095441	FBgn0053556	CG33556
chr3R	10389466	10391371	FBgn0259938	CG17100
chr2L	18455299	18462932	FBgn0032680	CG10174
chr2L	20310770	20312289	FBgn0003475	CG10076
chr2R	21707572	21710452	FBgn0265962	CR44749
chrX	19642379	19643992	FBgn0031048	CG12237
chrX	11422876	11424110	FBgn0001145	CG1743
chrX	4671529	4673520	FBgn0262699	CG3000
chrX	21588827	21590748	NA	NA
chr3R	9337579	9340309	FBgn0262993	CR43301
chr3R	11655201	11658324	FBgn0037926	CG10535
chr3L	5641407	5644643	FBgn0035625	CG5249
chr3R	29290474	29292172	NA	NA
chr2R	20127567	20132986	FBgn0265847	CR44636
chr3L	12073833	12075473	FBgn0284221	CG5661
chr2R	10781055	10783107	FBgn0053144	CG33144
chr2L	10554719	10562043	FBgn0051721	CG31721
chr3R	8809835	8813025	FBgn0037635	CG9837
chr2L	8691154	8693247	FBgn0004914	CG9310
chrX	10107312	10112675	FBgn0083940	CG34104
chr2L	7973467	7974893	FBgn0085450	CG34421
chr2L	2177280	2179301	FBgn0000097	CG3166
chrX	900352	902177	FBgn0264449	CG43867
chr2R	9443188	9444679	FBgn0259234	CG42332
chr3L	18818519	18824870	FBgn0036814	CG14073
chr3L	13224497	13229692	FBgn0023095	CG11282
chr3R	16226701	16233753	FBgn0040071	CG6889
chr3L	21961922	21964134	FBgn0029091	CG7464
chr3R	26210204	26214225	FBgn0265379	CR44320
chr2R	17709570	17712214	FBgn0028494	CG6424
chr3L	22003201	22010925	NA	NA
chr2L	3940481	3944219	FBgn0051774	CG31774
chr2R	22084135	22086614	FBgn0034691	CG6562
chrX	2298155	2305415	FBgn0023526	CG2865
chr3L	9395902	9397895	FBgn0035983	CG4080
chr2L	2174523	2176927	FBgn0000097	CG3166
chr3L	20784031	20786707	FBgn0037022	CG11396
chr3R	20835316	20837746	FBgn0027493	CG17273
chrX	1964612	1965975	FBgn0264562	CG43934
chrX	7226954	7232585	FBgn0029939	CG9650
chr2L	8533940	8536751	FBgn0028394	CG17834
chr2R	24962552	24965887	FBgn0050424	CG30424
chr3R	29781144	29783368	FBgn0001297	CG33956
chr2L	322240	322947	FBgn0031248	CG11912
chr3L	1100553	1102244	FBgn0004870	CG9097
chr2L	9509557	9512112	FBgn0032120	CG33298
chr2L	17375620	17379188	FBgn0032633	CG6860
chr3R	11637525	11641897	FBgn0262081	CG42317
chr2R	9878993	9883703	FBgn0033463	CG1513
chr2R	24681025	24684358	FBgn0035049	CG4859
chr3L	20447360	20449546	FBgn0036993	CG5910
chr3R	9871899	9875961	FBgn0267336	CG34360
chr3R	30276337	30277953	FBgn0267782	CR46113
chr2R	13331460	13336248	FBgn0265104	CR44206
chr2L	11064571	11067213	FBgn0032330	CG31868
chr3R	5039641	5044560	NA	NA
chr2R	13952507	13954625	FBgn0050481	CG30481
chr2L	20820421	20824227	FBgn0067311	CG33321
chrX	789669	790726	FBgn0265662	CR44469
chrX	18275598	18279986	FBgn0053542	CG33542
chr3R	5101644	5103161	NA	NA
chr3L	4105546	4110172	FBgn0028484	CG14992
chr2L	12466072	12469219	FBgn0259176	CG42281
chrX	13404828	13407028	FBgn0030484	CG1681
chr3R	10143953	10148556	FBgn0086359	CG3953
chrX	3185969	3187991	FBgn0000479	CG32498
chrX	3872920	3874872	FBgn0265575	CG44402
chr3R	17708087	17711313	FBgn0261885	CG7467
chr3L	21887614	21892085	FBgn0264470	CR43878
chr3R	13032347	13033496	FBgn0003308	CG7642
chrX	2286754	2292127	FBgn0023526	CG2865
chr2L	12587737	12591818	FBgn0085424	CG34395
chr3R	9590587	9594758	FBgn0037720	CG8312
chr2R	10324219	10325366	FBgn0250822	CG34222
chr3R	18398327	18400078	FBgn0028670	CG18617
chr2L	20903195	20910945	FBgn0032901	CG9339
chr2R	20162192	20165104	NA	NA
chr3L	16407352	16412092	FBgn0028399	CG4672
chr2R	10123781	10126960	FBgn0284235	CG46319
chr2L	2987662	2989308	FBgn0025681	CG3558
chrX	4937803	4941391	FBgn0266000	CG44774
chrX	19669476	19670137	FBgn0004057	CG12529
chr2R	15929501	15933757	FBgn0034049	CG8291
chr3R	20549284	20552387	FBgn0067783	CG4241
chrX	57002	59579	NA	NA
chrX	5744381	5745577	FBgn0261383	CG3125
chr2L	6080870	6083650	FBgn0266450	CG45074
chr3L	9853611	9855955	FBgn0004390	CG6721
chr3L	9419110	9424012	FBgn0035989	CG3967
chr3L	8674991	8677244	FBgn0001168	CG6494
chr2L	10750285	10755356	FBgn0032297	CG17124
chr3R	14712256	14714502	FBgn0262127	CG33967
chr3R	23991065	23993637	FBgn0039137	CG13604
chr3R	10266800	10271213	FBgn0037802	CG6284
chrX	18092373	18092751	FBgn0030892	CG7206
chr2L	9132504	9135981	FBgn0052982	CG32982
chr3R	5860370	5864120	FBgn0037391	CG2017
chr3R	16249196	16250957	FBgn0040071	CG6889
chr3R	21202314	21207662	FBgn0264357	CG17299
chr3L	6568950	6571014	FBgn0263973	CG32397
chr3R	12699435	12701488	FBgn0038078	CG14391
chr2L	5976755	5981056	FBgn0000308	CG9553
chr3R	17703418	17707731	FBgn0261885	CG7467
chr2R	6672021	6674279	FBgn0033087	CG3194
chr2R	22568128	22572040	FBgn0260866	CG12489
chr2R	10599029	10605744	FBgn0263102	CG2368
chr2R	19203513	19208280	FBgn0263395	CG7097
chr2R	23427391	23429037	FBgn0034861	CG9815
chrX	13304742	13306560	FBgn0266376	CR45018
chr2L	2862578	2865486	FBgn0031476	CG8813
chr2L	15245797	15247789	FBgn0028862	CG15267
chr3R	31070400	31074186	FBgn0024288	CG15552
chr2L	2896740	2902046	FBgn0041111	CG8817
chr3L	1324838	1325638	FBgn0011361	CG9160
chr2R	16817661	16819499	FBgn0034160	CG5550
chr3L	3403321	3404720	FBgn0014388	CG1921
chrX	1375162	1376125	FBgn0024987	CG3056
chr2R	24551116	24553289	FBgn0035021	CG4622
chr3L	17916341	17918586	FBgn0036772	CG5290
chrX	4612561	4615108	FBgn0052773	CR32773
chr3R	10241932	10243361	FBgn0261928	CG42795
chr2L	19788114	19791778	FBgn0032821	CG10538
chrX	8418445	8421568	FBgn0261793	CG18009

## Sheet: idr_esg-dam (Control) Peaks
chrom	start	end	FBID	symbol
chr2L	70112	75584	FBgn0051973	CG31973
chr2L	128082	129499	FBgn0025683	CG3164
chr2L	244817	246650	FBgn0265149	CR44218
chr2L	285483	287193	FBgn0267996	CR46263
chr2L	321718	322947	FBgn0031248	CG11912
chr2L	323164	324575	FBgn0031248	CG11912
chr2L	481041	486598	FBgn0267991	CR46258
chr2L	857752	858890	FBgn0262177	CR42884
chr2L	865263	868770	FBgn0086031	CR34660
chr2L	1116655	1117492	FBgn0016926	CG4710
chr2L	1117719	1120080	FBgn0016926	CG4710
chr2L	1447270	1448665	NA	NA
chr2L	1459784	1461653	NA	NA
chr2L	1722272	1723252	FBgn0031359	CG18317
chr2L	1885491	1886507	FBgn0031374	CG7337
chr2L	2146808	2147837	FBgn0031392	CG7263
chr2L	2165612	2166461	FBgn0000097	CG3166
chr2L	2167228	2168756	FBgn0000097	CG3166
chr2L	2174523	2176927	FBgn0000097	CG3166
chr2L	2177280	2179534	FBgn0000097	CG3166
chr2L	2179589	2180409	FBgn0000097	CG3166
chr2L	2370958	2372214	FBgn0031420	CG9866
chr2L	2748922	2752684	FBgn0031451	CG9961
chr2L	2769364	2770406	FBgn0031459	CG2862
chr2L	2862578	2866240	FBgn0031476	CG8813
chr2L	2887737	2888956	FBgn0041111	CG8817
chr2L	2969081	2969824	FBgn0024920	CG3181
chr2L	2987400	2989308	FBgn0025681	CG3558
chr2L	2992848	2994236	FBgn0025681	CG3558
chr2L	3056278	3060122	FBgn0283427	CG3523
chr2L	3108045	3108501	FBgn0015600	CG9660
chr2L	3362396	3363960	FBgn0085423	CG34394
chr2L	3477342	3479467	FBgn0261560	CG8846
chr2L	3770389	3772279	FBgn0263843	CR43704
chr2L	4327354	4330968	FBgn0028482	CG16857
chr2L	4378923	4379647	FBgn0026319	CG3048
chr2L	4475897	4477024	FBgn0011603	CG15444
chr2L	4887754	4889365	FBgn0031644	CG15625
chr2L	4892746	4896315	FBgn0267280	CR45716
chr2L	4980768	4981883	FBgn0031664	CG8892
chr2L	5095885	5097125	FBgn0031681	CG31651
chr2L	5236487	5238890	FBgn0003716	CG14026
chr2L	5292104	5293648	FBgn0265956	CR44743
chr2L	5805001	5806051	FBgn0265786	CR44575
chr2L	5876407	5880319	FBgn0031745	CG8965
chr2L	5976755	5979584	FBgn0000308	CG9553
chr2L	5986766	5989182	FBgn0001941	CG9078
chr2L	5997097	5999343	FBgn0031759	CG9088
chr2L	6045250	6047498	FBgn0085208	CG34179
chr2L	6077186	6083947	FBgn0031778	CR9162
chr2L	6084301	6090308	FBgn0266450	CG45074
chr2L	6177682	6179950	FBgn0085409	CG34380
chr2L	6340629	6342542	FBgn0015623	CG11567
chr2L	6342651	6343822	FBgn0015623	CG11567
chr2L	6560253	6562810	FBgn0031829	CG9595
chr2L	6682918	6685202	FBgn0031849	CG11327
chr2L	6785275	6787104	FBgn0015776	CG9258
chr2L	7013691	7014374	FBgn0031879	CG9138
chr2L	7046907	7048099	FBgn0262872	CG43227
chr2L	7082639	7083310	FBgn0265822	CR44611
chr2L	7494886	7497004	FBgn0011283	CG6641
chr2L	7522542	7523949	FBgn0264895	CG44086
chr2L	7789630	7791227	FBgn0266072	CR44825
chr2L	7811724	7814317	FBgn0261800	CG7123
chr2L	8155942	8160183	FBgn0263256	CG43394
chr2L	8415912	8418914	FBgn0032042	CG13398
chr2L	8532991	8536751	FBgn0085470	CG34441
chr2L	8700088	8704311	FBgn0004914	CG9310
chr2L	8704438	8706051	FBgn0004914	CG9310
chr2L	8734136	8735628	FBgn0003209	CG12437
chr2L	9012355	9013323	FBgn0032089	CG9573
chr2L	9064561	9066325	FBgn0265676	CR44483
chr2L	9612027	9615144	FBgn0019809	CG3858
chr2L	9619919	9620748	FBgn0032135	CG3881
chr2L	9704516	9707565	FBgn0051710	CG31710
chr2L	9782358	9783692	FBgn0032147	CG4026
chr2L	9784191	9786309	FBgn0032149	CG4036
chr2L	9917261	9919749	FBgn0032157	CG5899
chr2L	9937768	9939883	FBgn0051712	CG31712
chr2L	9985664	9987660	FBgn0040965	CR13130
chr2L	10003966	10004851	FBgn0051875	CG31875
chr2L	10009482	10010677	FBgn0011584	CG4758
chr2L	10662155	10663847	FBgn0051871	CG31871
chr2L	10750322	10755356	FBgn0032297	CG17124
chr2L	11036824	11042809	FBgn0032330	CG31868
chr2L	11045002	11046387	FBgn0032330	CG31868
chr2L	11064571	11067573	FBgn0032330	CG31868
chr2L	11970155	11971448	FBgn0263019	CR43314
chr2L	12365509	12366378	FBgn0262475	CG43065
chr2L	12479936	12484711	FBgn0259176	CG42281
chr2L	12530245	12532310	FBgn0259176	CG42281
chr2L	12587737	12592294	FBgn0085424	CG34395
chr2L	13055134	13058532	FBgn0262160	CG9932
chr2L	13372794	13374976	FBgn0032511	CG9306
chr2L	13833987	13841251	FBgn0001961	CG8978
chr2L	14354967	14357822	FBgn0266145	CR44851
chr2L	14401574	14405269	FBgn0004858	CG4220
chr2L	15313919	15316329	NA	NA
chr2L	15478178	15478960	FBgn0003448	CG3956
chr2L	15483991	15485099	FBgn0020371	CG15257
chr2L	15493324	15494812	FBgn0002524	CG4162
chr2L	15745025	15746710	FBgn0266309	CR44974
chr2L	16282304	16286393	FBgn0040079	CG4132
chr2L	16521117	16523730	FBgn0032587	CG5953
chr2L	16887617	16889551	FBgn0260758	CG42556
chr2L	17389023	17389965	FBgn0020503	CG5020
chr2L	17448502	17450440	FBgn0032637	CG5050
chr2L	18145124	18149333	FBgn0032668	CG17681
chr2L	18560886	18562679	FBgn0085370	CG34341
chr2L	18819889	18820972	FBgn0032713	CG17323
chr2L	18830152	18830645	FBgn0015808	CG17320
chr2L	18995449	18996317	FBgn0046302	CG10650
chr2L	19137236	19141871	FBgn0010300	CG10719
chr2L	19155223	19157393	FBgn0010300	CG10719
chr2L	19410212	19411387	FBgn0041789	CG31794
chr2L	19431936	19434726	FBgn0032781	CG9987
chr2L	19946693	19950152	FBgn0263873	CG43720
chr2L	19967204	19967998	FBgn0042129	CG18806
chr2L	20758161	20758799	FBgn0011202	CG1768
chr2L	20792019	20793859	FBgn0032886	CG9328
chr2L	20820421	20824227	FBgn0067311	CG33321
chr2L	20882256	20884137	FBgn0263996	CG43739
chr2L	20889779	20891689	FBgn0263996	CG43739
chr2R	5981263	5985095	FBgn0264959	CG44128
chr2R	6022227	6023427	FBgn0033051	CG7863
chr2R	6119735	6123414	FBgn0000546	CG1765
chr2R	6124685	6126273	FBgn0000546	CG1765
chr2R	6139355	6143939	FBgn0011958	CR30304
chr2R	6144623	6146592	FBgn0011891	CR32837
chr2R	6178712	6180039	FBgn0040502	CG8343
chr2R	6500902	6504166	FBgn0267744	CR46075
chr2R	6536835	6538293	FBgn0264506	CR43905
chr2R	6547620	6549503	FBgn0086655	CG9397
chr2R	6625701	6633075	FBgn0042085	CG3274
chr2R	6649346	6651928	FBgn0033079	CG3174
chr2R	6714844	6716465	FBgn0033096	CG9428
chr2R	6787693	6789234	FBgn0085421	CG34392
chr2R	6991590	6994155	FBgn0042086	CG18816
chr2R	7044848	7046554	FBgn0033133	CG12841
chr2R	7060385	7061784	FBgn0033139	CG12837
chr2R	7149135	7150820	FBgn0003090	CG11084
chr2R	7251989	7258179	FBgn0266818	CR45280
chr2R	7407252	7408114	FBgn0033166	CG11166
chr2R	7450765	7451801	FBgn0050502	CG30502
chr2R	7457315	7459211	FBgn0025885	CG11143
chr2R	7491304	7492240	FBgn0263240	CG1621
chr2R	7499478	7500920	FBgn0261397	CG2146
chr2R	7533275	7534479	FBgn0033190	CG2137
chr2R	7565909	7567924	FBgn0050499	CG30499
chr2R	7613679	7616927	FBgn0033196	CG1358
chr2R	7688347	7697230	FBgn0033212	CG1399
chr2R	7718559	7720329	FBgn0042135	CG18812
chr2R	7758751	7759582	FBgn0266526	NA
chr2R	7782347	7783652	FBgn0263558	CR43543
chr2R	7802205	7803343	FBgn0033224	CG1553
chr2R	8147950	8149377	FBgn0010504	CG11546
chr2R	8194272	8197810	FBgn0053087	CG33087
chr2R	8610061	8611924	FBgn0267792	CG8643
chr2R	8653202	8654501	FBgn0003892	CG2411
chr2R	9139099	9140490	FBgn0260972	CG8057
chr2R	9148381	9150149	FBgn0050344	CG30344
chr2R	9412873	9415837	FBgn0016078	CG8804
chr2R	9587619	9589300	FBgn0261016	CG42600
chr2R	9826354	9828469	FBgn0033447	CG1625
chr2R	9832555	9836548	FBgn0033448	CG1623
chr2R	9839175	9840225	FBgn0033448	CG1623
chr2R	9856574	9858257	FBgn0027580	CG1516
chr2R	9889556	9891450	FBgn0033461	CG12923
chr2R	9927868	9929505	FBgn0011656	CG1429
chr2R	10123828	10126960	FBgn0284235	CG46319
chr2R	10129943	10130884	FBgn0284235	CG46319
chr2R	10162863	10166245	FBgn0265512	CG12214
chr2R	10270705	10273614	FBgn0033504	CG18408
chr2R	10275703	10277353	FBgn0033504	CG18408
chr2R	10475114	10478850	FBgn0261862	CG12891
chr2R	10537755	10539489	FBgn0263483	CR43598
chr2R	10601708	10603192	FBgn0263102	CG2368
chr2R	10645029	10646801	FBgn0033541	CG12934
chr2R	10648559	10650474	FBgn0033541	CG12934
chr2R	10853723	10856682	FBgn0050015	CG30015
chr2R	11191792	11193164	FBgn0003396	CG7734
chr2R	11193794	11195024	FBgn0003396	CG7734
chr2R	11201786	11208501	FBgn0003396	CG7734
chr2R	11265987	11267176	FBgn0033602	CG13222
chr2R	11630054	11634562	FBgn0033638	CG9005
chr2R	11634737	11640679	FBgn0033638	CG9005
chr2R	11659440	11661291	FBgn0011916	CR32844
chr2R	11715461	11718352	FBgn0033649	CG13194
chr2R	12172691	12174563	FBgn0286006	CR42931
chr2R	12342428	12345713	FBgn0033717	CG8839
chr2R	12585893	12592744	FBgn0022764	CG8815
chr2R	12925007	12928157	FBgn0033782	CG3850
chr2R	12950579	12953989	FBgn0265185	CG44250
chr2R	13232346	13233318	FBgn0033815	CG4676
chr2R	13233964	13234905	FBgn0033817	CG4688
chr2R	13333470	13334167	FBgn0265104	CR44206
chr2R	13336603	13338455	FBgn0265104	CR44206
chr2R	13446995	13451349	FBgn0013765	CG4832
chr2R	13545314	13547983	FBgn0033853	CG6145
chr2R	13853396	13855095	FBgn0033879	CG6543
chr2R	13894869	13898023	FBgn0013733	CG18076
chr2R	13923121	13925822	FBgn0013733	CG18076
chr2R	13925840	13926907	FBgn0013733	CG18076
chr2R	13935653	13937826	FBgn0013733	CG18076
chr2R	13978407	13979252	FBgn0033889	CG6701
chr2R	14024263	14027946	FBgn0002643	CG8118
chr2R	14289392	14291497	FBgn0263397	CG8585
chr2R	14333340	14335047	FBgn0085408	CG34379
chr2R	14481588	14483200	FBgn0267824	CG46146
chr2R	14484811	14488319	FBgn0267824	CG46146
chr2R	14927350	14928341	FBgn0027596	CG10249
chr2R	15118326	15130129	FBgn0015371	CG11798
chr2R	15130433	15132086	FBgn0015371	CG11798
chr2R	15246158	15247599	FBgn0003328	NA
chr2R	15356822	15357499	FBgn0034013	CG8166
chr2R	15530093	15532624	FBgn0019968	CG8183
chr2R	15556821	15560320	FBgn0034031	CG12963
chr2R	15674388	15676599	FBgn0266636	CR45143
chr2R	15742609	15747150	FBgn0050089	CG30089
chr2R	15768768	15770054	FBgn0265991	CG30084
chr2R	15816449	15817918	FBgn0265991	CG30084
chr2R	16019064	16019666	FBgn0034067	CG8399
chr2R	16103913	16105223	FBgn0014020	CG8416
chr2R	16196757	16198187	FBgn0262026	CG42837
chr2R	16210429	16212673	FBgn0034091	CG8448
chr2R	16385316	16386884	FBgn0262816	CG43187
chr2R	16579343	16580805	FBgn0034140	CG8317
chr2R	16581393	16584238	FBgn0034140	CG8317
chr2R	16587510	16588085	FBgn0034141	CG8311
chr2R	16666041	16667175	FBgn0024315	CG8098
chr2R	16783258	16785283	FBgn0034158	CG5522
chr2R	16817324	16819499	FBgn0034160	CG5550
chr2R	16832813	16834110	FBgn0263659	CR43650
chr2R	17085900	17088134	FBgn0050460	CG30460
chr2R	17098218	17102880	FBgn0010226	CG8938
chr2R	17405938	17407436	FBgn0034210	CG6568
chr2R	17543329	17544851	FBgn0028382	CG4886
chr2R	17709570	17713167	FBgn0028494	CG6424
chr2R	17800943	17801962	FBgn0266808	CR45270
chr2R	18150241	18152177	FBgn0034304	CG5742
chr2R	18503392	18504422	FBgn0034354	CG5224
chr2R	18610796	18611947	FBgn0034360	CG10927
chr2R	18620258	18622092	FBgn0266671	CG5341
chr2R	18776461	18777292	FBgn0034390	CG15093
chr2R	18799283	18801867	FBgn0265661	CR44468
chr2R	18801950	18804948	FBgn0265661	CR44468
chr2R	19137025	19138292	FBgn0000578	CG15112
chr2R	19394548	19396416	FBgn0267587	CR45925
chr2R	19461827	19463634	FBgn0260934	CG8201
chr2R	19466584	19469496	FBgn0260934	CG8201
chr2R	20110872	20112765	FBgn0004364	CG8896
chr2R	20126363	20130706	NA	NA
chr2R	20319419	20321934	FBgn0034501	CG13868
chr2R	20534257	20534788	FBgn0034513	CG13423
chr2R	20834761	20835981	FBgn0016984	CG9985
chr2R	21031123	21034041	FBgn0266641	CR45148
chr2R	21048745	21050096	FBgn0003391	CG3722
chr2R	21082518	21084191	FBgn0003748	CG9364
chr2R	21144278	21145158	FBgn0026582	CG9418
chr2R	21249947	21251088	FBgn0034606	CG18375
chr2R	21287971	21289015	FBgn0016726	CG10071
chr2R	21311915	21313736	FBgn0034618	CG9485
chr2R	21361955	21362401	FBgn0000395	CG15671
chr2R	21378427	21380622	FBgn0000395	CG15671
chr2R	21541273	21543651	FBgn0260477	CG30283
chr2R	21547910	21550841	FBgn0003731	CG10079
chr2R	21552367	21554899	FBgn0003731	CG10079
chr2R	21605526	21607681	FBgn0266643	CR45150
chr2R	21609097	21613972	FBgn0266643	CR45150
chr2R	21632399	21635329	FBgn0034643	CG10321
chr2R	21645150	21647780	FBgn0034644	CG10082
chr2R	21698530	21701960	FBgn0266346	CG17922
chr2R	21707572	21710452	FBgn0265962	CR44749
chr2R	22244232	22245925	FBgn0020307	CG5799
chr2R	22300980	22301957	FBgn0034718	CG3413
chr2R	22323367	22326562	FBgn0016053	CG32885
chr2R	22389930	22390841	FBgn0034723	CG13506
chr2R	22539826	22546586	FBgn0003175	CG4444
chr2R	22560871	22562152	FBgn0003175	CG4444
chr2R	22568128	22572040	FBgn0260866	CG12489
chr2R	22590310	22593704	FBgn0034739	CG3927
chr2R	22666614	22669260	FBgn0040658	CG13516
chr2R	22669417	22670685	FBgn0266807	CR45269
chr2R	22679850	22684119	FBgn0265983	CR44762
chr2R	22804362	22806233	FBgn0086408	CG3622
chr2R	22829042	22829740	FBgn0034782	CG12490
chr2R	22998793	23000128	FBgn0003900	CG2956
chr2R	23382891	23385205	FBgn0266011	CR44784
chr2R	23569032	23574045	FBgn0015903	CG5393
chr2R	23667927	23670088	FBgn0266377	CG45019
chr2R	23717913	23718822	FBgn0034898	CG18128
chr2R	23724371	23727311	FBgn0034898	CG18128
chr2R	23743803	23747886	FBgn0034899	CG13560
chr2R	23844955	23846456	FBgn0086659	CR33913
chr2R	23932449	23933194	FBgn0263006	CG3725
chr2R	23977831	23980694	FBgn0034948	CG3825
chr2R	23980781	23983445	FBgn0034948	CG3825
chr2R	24130365	24133416	FBgn0264297	CG43775
chr2R	24186531	24188610	FBgn0266083	CG3363
chr2R	24539857	24541344	FBgn0035021	CG4622
chr2R	24551116	24553289	FBgn0035021	CG4622
chr2R	24553301	24555150	FBgn0035021	CG4622
chr2R	24677014	24678366	FBgn0035049	CG4859
chr2R	24681423	24684358	FBgn0035049	CG4859
chr2R	24684618	24687180	FBgn0035049	CG4859
chr2R	24687757	24688409	FBgn0035049	CG4859
chr2R	24767338	24769015	FBgn0040666	CG12848
chr2R	24881965	24883580	FBgn0085442	CG34413
chr2R	24899724	24903197	FBgn0085434	CG34405
chr2R	24927151	24928159	FBgn0060296	CG15860
chr2R	24944618	24946079	FBgn0035082	CG2811
chr2R	24979014	24981903	FBgn0010435	CG2727
chr2R	24983749	24987231	FBgn0010435	CG2727
chr2R	25000602	25002392	FBgn0265434	CG15792
chr2R	25187652	25189919	FBgn0035094	CG9380
chr3L	70541	74277	FBgn0262680	CR43150
chr3L	84570	88128	NA	NA
chr3L	158645	161505	FBgn0035101	CG1212
chr3L	216918	217966	FBgn0035110	CG17143
chr3L	310394	313767	FBgn0284444	CG34264
chr3L	339943	341845	FBgn0035132	CG17061
chr3L	566362	567491	FBgn0035142	CG17090
chr3L	632882	634139	FBgn0263039	NA
chr3L	638765	641902	FBgn0263342	CR43423
chr3L	648795	651471	FBgn0035147	CG12030
chr3L	684489	686463	FBgn0035154	CG3344
chr3L	748673	752412	FBgn0035160	CG13897
chr3L	753319	754186	FBgn0035160	CG13897
chr3L	764774	767668	FBgn0052481	CR32481
chr3L	779629	783545	NA	NA
chr3L	783687	786068	NA	NA
chr3L	786303	789826	NA	NA
chr3L	818529	821851	FBgn0264475	CR43883
chr3L	874586	877036	FBgn0052479	CG32479
chr3L	1029669	1032768	FBgn0035181	CG9205
chr3L	1098409	1099129	FBgn0004870	CG9097
chr3L	1202516	1204082	FBgn0063667	CG32335
chr3L	1204095	1206202	FBgn0063667	CG32335
chr3L	1318149	1320783	FBgn0010246	CG9155
chr3L	1324871	1326039	FBgn0011361	CG9160
chr3L	1346338	1349031	FBgn0035213	CG2199
chr3L	1637618	1640488	FBgn0035247	CG13929
chr3L	1725744	1727552	FBgn0027594	CG2086
chr3L	1738447	1743378	FBgn0035266	CG7995
chr3L	1885722	1886927	FBgn0000109	CG18315
chr3L	2416713	2418599	FBgn0266696	CG45186
chr3L	2569519	2571080	FBgn0010909	CG16973
chr3L	2770403	2770912	FBgn0035371	CG9977
chr3L	3036572	3037532	FBgn0035388	CG2162
chr3L	3045773	3047536	FBgn0052485	CG32485
chr3L	3051265	3053313	FBgn0052485	CG32485
chr3L	3080625	3084401	FBgn0035397	CG11486
chr3L	3121289	3126980	FBgn0052273	CR32273
chr3L	3164922	3166112	FBgn0035407	CG14962
chr3L	3178734	3180071	FBgn0035410	CG14964
chr3L	3197191	3199395	FBgn0001233	CG1242
chr3L	3208398	3209861	FBgn0035416	NA
chr3L	3238560	3239232	FBgn0035425	CG17746
chr3L	3245489	3248553	FBgn0263617	CR43626
chr3L	3302157	3303125	FBgn0035432	CG17723
chr3L	3306742	3309354	FBgn0035432	CG17723
chr3L	3349008	3351681	FBgn0004167	CG12008
chr3L	3396724	3397785	NA	NA
chr3L	3410768	3412747	FBgn0262260	CR42967
chr3L	3544678	3546189	FBgn0005640	CG10579
chr3L	3776068	3778050	FBgn0052264	CG32264
chr3L	4070101	4072296	FBgn0016013	CG14993
chr3L	4103853	4104309	FBgn0028484	CG14992
chr3L	4170002	4172316	FBgn0261274	CG1333
chr3L	4221539	4223251	FBgn0263110	CG43367
chr3L	4226264	4226929	FBgn0052252	CR32252
chr3L	4408784	4414054	FBgn0035542	CG11347
chr3L	4541385	4543934	FBgn0035558	CG11357
chr3L	5184698	5186282	FBgn0052423	CG32423
chr3L	5567723	5568256	FBgn0015766	CG10596
chr3L	5640544	5645118	FBgn0035625	CG5249
chr3L	5655668	5657924	FBgn0035626	CG17334
chr3L	5800541	5802234	FBgn0035638	CG10541
chr3L	6253510	6256919	FBgn0035696	CG10173
chr3L	6609678	6612046	FBgn0024177	CG10125
chr3L	6947873	6948930	FBgn0035719	CG14821
chr3L	6976851	6978831	FBgn0001104	CG10060
chr3L	7094552	7095441	FBgn0053556	CG33556
chr3L	7130285	7133070	FBgn0035742	CG8629
chr3L	7344536	7345464	FBgn0035767	CG8596
chr3L	7360718	7361440	FBgn0035770	CG8588
chr3L	7530080	7530947	FBgn0028582	CG8532
chr3L	7865769	7866402	FBgn0016694	CG17888
chr3L	7910978	7912701	FBgn0052368	CG32368
chr3L	7960006	7963515	NA	NA
chr3L	8096304	8097334	FBgn0035833	CG7565
chr3L	8288633	8289738	FBgn0027569	CG7207
chr3L	8347376	8348062	FBgn0035879	CG7112
chr3L	8424920	8426881	FBgn0020224	CG7037
chr3L	8455445	8461611	FBgn0010825	CG6964
chr3L	8544568	8548035	FBgn0260442	CG6831
chr3L	8549305	8551883	FBgn0260442	CG6831
chr3L	8674991	8677244	FBgn0001168	CG6494
chr3L	8698662	8700728	NA	NA
chr3L	8701033	8702965	NA	NA
chr3L	9128310	9128931	FBgn0011206	CG4760
chr3L	9357522	9359624	FBgn0085485	CG34456
chr3L	9372205	9373223	FBgn0001229	CG4190
chr3L	9395902	9397895	FBgn0035983	CG4080
chr3L	9419110	9424222	FBgn0035989	CG3967
chr3L	9501016	9504060	FBgn0036007	CG3424
chr3L	9614414	9616583	FBgn0267348	CG3322
chr3L	9671013	9672084	FBgn0016081	CG32045
chr3L	9694293	9697272	FBgn0015321	CG8284
chr3L	10682416	10684258	FBgn0010762	CG32067
chr3L	10896497	10899463	FBgn0036111	CG6391
chr3L	11044718	11046297	FBgn0266594	CR45119
chr3L	11080341	11081571	FBgn0020412	CG6297
chr3L	11209102	11211450	FBgn0061469	CG6190
chr3L	11211985	11216299	FBgn0261553	CG42671
chr3L	11351462	11355250	FBgn0266786	CR45251
chr3L	11777390	11778794	FBgn0262291	CR42998
chr3L	12083740	12085930	FBgn0036246	CG17154
chr3L	12405220	12410690	FBgn0036282	CG14122
chr3L	12486903	12488539	FBgn0036288	CG10660
chr3L	12489890	12491797	FBgn0036288	CG10660
chr3L	12500718	12502129	FBgn0036289	CG10657
chr3L	12533373	12535204	FBgn0036300	CG10688
chr3L	12797781	12800224	FBgn0260945	CG10967
chr3L	13232130	13233751	FBgn0023095	CG11282
chr3L	13255002	13255502	FBgn0023095	CG11282
chr3L	13257431	13262077	FBgn0023095	CG11282
chr3L	13476574	13478407	FBgn0086708	CG32130
chr3L	13484195	13486231	FBgn0036373	CG10741
chr3L	13487748	13490282	FBgn0036373	CG10741
chr3L	13862480	13863869	FBgn0036381	CG8745
chr3L	14105395	14108831	FBgn0036411	CG7345
chr3L	14206427	14208739	FBgn0013718	CG33991
chr3L	14362968	14366813	FBgn0001085	CG17697
chr3L	14751159	14752254	FBgn0260233	CG42507
chr3L	14757982	14758832	FBgn0260233	CG42507
chr3L	14985918	14989166	FBgn0002778	CG3297
chr3L	15233894	15235147	FBgn0029114	CG6890
chr3L	15596476	15598623	FBgn0036518	CG32149
chr3L	15974871	15975663	FBgn0000212	CG5942
chr3L	16152556	16155418	FBgn0036576	CG5151
chr3L	16156770	16162674	FBgn0036576	CG5151
chr3L	16483372	16487600	FBgn0004569	CG4531
chr3L	16698066	16700002	FBgn0063485	CG3849
chr3L	16748313	16749324	NA	NA
chr3L	16799834	16800288	FBgn0021768	CG9710
chr3L	16955353	16956689	FBgn0010352	CG11661
chr3L	16969754	16971098	FBgn0261547	CG42665
chr3L	16988683	16989569	FBgn0261547	CG42665
chr3L	16999308	17002312	FBgn0036684	CG3764
chr3L	17620749	17626196	FBgn0036740	CG6259
chr3L	17662354	17664260	FBgn0036746	CG6064
chr3L	17756030	17758789	FBgn0052181	CG32181
chr3L	17949477	17951582	FBgn0000568	CG8127
chr3L	17971612	17973538	FBgn0000568	CG8127
chr3L	18001907	18004843	FBgn0086081	CR34710
chr3L	18010214	18013508	FBgn0000568	CG8127
chr3L	18015154	18016884	FBgn0000568	CG8127
chr3L	18103985	18106276	FBgn0002901	CG7347
chr3L	18271014	18274201	NA	NA
chr3L	18755721	18758702	FBgn0001078	CG4059
chr3L	18770886	18772712	FBgn0001078	CG4059
chr3L	18867866	18869529	FBgn0267572	CR45912
chr3L	19168871	19169667	FBgn0016797	CG9739
chr3L	19173533	19173988	FBgn0016797	CG9739
chr3L	19630214	19634255	FBgn0036896	CG8789
chr3L	19790110	19794224	FBgn0261283	CG8522
chr3L	19812804	19813911	FBgn0013799	CG8567
chr3L	19894924	19899770	FBgn0052218	CR32218
chr3L	19906429	19907768	FBgn0036915	CG7757
chr3L	19944496	19947026	FBgn0004852	CG7978
chr3L	20187066	20189630	FBgn0036945	CG6981
chr3L	20196139	20199445	FBgn0262022	CG42833
chr3L	20384683	20387984	FBgn0027565	CG5498
chr3L	20397665	20399633	FBgn0028978	CG5408
chr3L	20446837	20449546	FBgn0036993	CG5910
chr3L	20509630	20510495	FBgn0052425	CG32425
chr3L	20730576	20734942	FBgn0264573	CR43945
chr3L	21204244	21205809	FBgn0037057	CG10512
chr3L	21251886	21253800	FBgn0004865	CG18023
chr3L	21934704	21935089	FBgn0037140	CG7442
chr3L	21961910	21964134	FBgn0029091	CG7464
chr3L	22001242	22002894	NA	NA
chr3L	22003201	22007520	NA	NA
chr3L	22266611	22269378	FBgn0025702	CG11489
chr3L	22463117	22465495	FBgn0037163	CG11440
chr3L	22669383	22674368	FBgn0262249	CR42956
chr3L	22773930	22775728	FBgn0052451	CG32451
chr3L	22822003	22825384	FBgn0027339	CG11352
chr3L	22833660	22835719	FBgn0027339	CG11352
chr3L	22870106	22872796	FBgn0037200	CG11109
chr3R	4462344	4462903	FBgn0051522	CG31522
chr3R	4469099	4471374	FBgn0051523	CG31523
chr3R	4649255	4650835	FBgn0265038	CR44155
chr3R	4910697	4915180	FBgn0265082	CG44193
chr3R	4988788	4990909	FBgn0263343	CR43424
chr3R	4991176	4999663	FBgn0037292	CG2022
chr3R	5214839	5217683	FBgn0259212	CG42312
chr3R	5229401	5230428	FBgn0037301	CG12005
chr3R	5316531	5320136	FBgn0013576	CG32464
chr3R	5516781	5518538	FBgn0010399	CG2902
chr3R	5570322	5572932	FBgn0023023	CG1411
chr3R	5653592	5654682	FBgn0264902	CR44093
chr3R	5658884	5660014	FBgn0264902	CR44093
chr3R	5670641	5671985	FBgn0037363	CG1347
chr3R	5735637	5738080	FBgn0037369	CG2100
chr3R	5793794	5795182	FBgn0037376	CG2051
chr3R	5841850	5845397	FBgn0037389	CR10991
chr3R	6643624	6645529	FBgn0010355	CG17603
chr3R	6808983	6816502	FBgn0026162	CR31490
chr3R	7088102	7091466	FBgn0040670	CG14612
chr3R	7540854	7541798	FBgn0015570	CG2505
chr3R	7906567	7907259	FBgn0037530	CG2943
chr3R	8111332	8115149	FBgn0243512	CG7850
chr3R	8120297	8121472	FBgn0037549	CG7878
chr3R	8352536	8355162	FBgn0261108	CG7331
chr3R	8355170	8359747	FBgn0037584	CG7963
chr3R	8927123	8928515	FBgn0262614	CG43140
chr3R	8939031	8940028	FBgn0037643	CG11963
chr3R	9032904	9034394	FBgn0037657	CG11990
chr3R	9047523	9051073	FBgn0037659	CG11033
chr3R	9052528	9058404	FBgn0014018	CG11992
chr3R	9225433	9227414	FBgn0266706	CR45196
chr3R	9417489	9420487	FBgn0261552	CG42670
chr3R	9502038	9504197	FBgn0014380	CG9366
chr3R	9527948	9529462	FBgn0000244	CG9379
chr3R	9570793	9574703	FBgn0037714	CG9396
chr3R	9627460	9629085	FBgn0037721	CG9427
chr3R	9703414	9705293	FBgn0051352	CG31352
chr3R	9769230	9770350	FBgn0037751	CG8484
chr3R	9927047	9929705	FBgn0267336	CG34360
chr3R	9987298	9988315	FBgn0267336	CG34360
chr3R	10082708	10086039	FBgn0266414	CR45054
chr3R	10097440	10099638	FBgn0262419	CR42968
chr3R	10209534	10211147	FBgn0025879	CG6281
chr3R	10281818	10284421	FBgn0011970	CR31396
chr3R	10389466	10391371	FBgn0259938	CG17100
chr3R	10391818	10392396	FBgn0259938	CG17100
chr3R	10862013	10863978	FBgn0037845	CG14694
chr3R	10883912	10887276	FBgn0037856	CG4674
chr3R	11215904	11217766	FBgn0086472	CG6684
chr3R	11235241	11235930	FBgn0051441	CG31441
chr3R	11565046	11567399	FBgn0263316	CG14709
chr3R	11647632	11648483	FBgn0037926	CG10535
chr3R	11668711	11670932	FBgn0037930	CG14715
chr3R	11756623	11761866	FBgn0017581	CG17342
chr3R	11810915	11814655	FBgn0019624	CG14724
chr3R	11962443	11964105	FBgn0000147	CG3068
chr3R	11966846	11970108	FBgn0037970	CG12201
chr3R	12360465	12361621	FBgn0038016	CG10042
chr3R	12365522	12366595	FBgn0042206	CG18548
chr3R	12429675	12431829	FBgn0086134	CG5266
chr3R	12642246	12645261	FBgn0038070	CG6753
chr3R	12645280	12650637	FBgn0038070	CG6753
chr3R	13032347	13033496	FBgn0003308	CG7642
chr3R	13814806	13815479	FBgn0263650	CR43641
chr3R	14069963	14070456	FBgn0038197	CG3143
chr3R	14288101	14291329	FBgn0285913	CG12207
chr3R	14294413	14296728	FBgn0285913	CG12207
chr3R	14296947	14300847	FBgn0285913	CG12207
chr3R	14472898	14475166	FBgn0285955	CG34389
chr3R	14679447	14680767	FBgn0265140	CG7649
chr3R	14722963	14724164	FBgn0262127	CG33967
chr3R	14737461	14739769	FBgn0011217	CG7425
chr3R	14810907	14811536	FBgn0266756	CG44012
chr3R	14817353	14819014	FBgn0266756	CG44012
chr3R	15091212	15092783	FBgn0038286	CG6966
chr3R	15114239	15117786	FBgn0261859	CG42788
chr3R	15197678	15199337	FBgn0038296	CG6752
chr3R	15267444	15270357	FBgn0263740	CG43665
chr3R	15342034	15342854	FBgn0038321	CG6218
chr3R	15834310	15835393	FBgn0003227	CG31293
chr3R	15994890	15996321	FBgn0003507	CG3992
chr3R	16004464	16007724	FBgn0038391	CG10278
chr3R	16048772	16050311	FBgn0038395	CG10407
chr3R	16071610	16072285	FBgn0038397	CG10185
chr3R	16204963	16207807	FBgn0267200	CR45640
chr3R	16223100	16225079	FBgn0267203	CR45643
chr3R	16230070	16233116	FBgn0040071	CG6889
chr3R	16234169	16235474	FBgn0040071	CG6889
chr3R	16243469	16249057	FBgn0040071	CG6889
chr3R	16249196	16250957	FBgn0040071	CG6889
chr3R	16305038	16306283	FBgn0038412	CG6898
chr3R	16330321	16333968	FBgn0040271	CG6725
chr3R	16348484	16349538	FBgn0027095	CG7013
chr3R	16355479	16356259	FBgn0038420	CG10311
chr3R	16981022	16982018	FBgn0015008	CG8953
chr3R	16986249	16988768	FBgn0266748	CR45221
chr3R	17007730	17008451	FBgn0038466	CG8907
chr3R	17145220	17147896	FBgn0264291	CG12265
chr3R	17963763	17966671	FBgn0263995	CG43738
chr3R	18166135	18170204	FBgn0038569	CG7218
chr3R	18252185	18253403	FBgn0263757	CG43662
chr3R	18279157	18281530	FBgn0038597	CG8064
chr3R	18398327	18400078	FBgn0028670	CG18617
chr3R	18449984	18450850	FBgn0004652	CG14307
chr3R	18747370	18748954	FBgn0024329	CG7717
chr3R	19152496	19153742	FBgn0002962	CG5637
chr3R	19249573	19252747	FBgn0038694	CG5217
chr3R	19320454	19324472	FBgn0000463	CG3619
chr3R	19879180	19881051	FBgn0038742	CG4703
chr3R	19904727	19906991	FBgn0266407	CR45047
chr3R	20542044	20544111	FBgn0016917	CG4257
chr3R	20549284	20552830	FBgn0067782	CG33488
chr3R	20563252	20564465	FBgn0038803	CG5191
chr3R	20780397	20783402	FBgn0038826	CG17838
chr3R	20790279	20792683	FBgn0038826	CG17838
chr3R	20828712	20831139	FBgn0027493	CG17273
chr3R	20983101	20986874	FBgn0263400	CG43446
chr3R	21126903	21128781	FBgn0038860	CG10825
chr3R	21192659	21196863	FBgn0264357	CG17299
chr3R	21202314	21205994	FBgn0264357	CG17299
chr3R	21246773	21247748	FBgn0038874	CG5911
chr3R	21346773	21351804	FBgn0038881	CG16791
chr3R	21614969	21616779	FBgn0264826	CR44034
chr3R	21719255	21720654	FBgn0051176	CG31176
chr3R	21740249	21741475	FBgn0261060	CG42608
chr3R	21856048	21858006	FBgn0015229	CG6575
chr3R	21869650	21870810	FBgn0051174	CG31174
chr3R	21895401	21898631	FBgn0038917	CG6678
chr3R	21948057	21950375	FBgn0264490	CG18389
chr3R	22367001	22368743	FBgn0038950	CG5382
chr3R	22411646	22412986	FBgn0261279	CG42250
chr3R	22449383	22453453	FBgn0085405	CG34376
chr3R	22595404	22598002	FBgn0051158	CG31158
chr3R	22632022	22635088	FBgn0266418	CG45058
chr3R	22749279	22750038	FBgn0051139	CG31139
chr3R	23047259	23048499	FBgn0041225	CG31280
chr3R	23224679	23227669	FBgn0262975	CG43286
chr3R	23345807	23346652	FBgn0264326	CG6768
chr3R	23518232	23519199	FBgn0039081	CG4370
chr3R	23729255	23730949	FBgn0065098	CR33682
chr3R	23781210	23783922	FBgn0039120	CG10198
chr3R	23898352	23899295	FBgn0016754	CG13598
chr3R	23938124	23939963	FBgn0039129	CG5338
chr3R	23940340	23942644	FBgn0001098	CG5320
chr3R	23991065	23994122	FBgn0039137	CG13604
chr3R	24229752	24232650	FBgn0039169	CG5669
chr3R	24319147	24320738	FBgn0267762	CR46093
chr3R	24348377	24349746	FBgn0039187	CG6454
chr3R	24620335	24622303	FBgn0263490	CG34100
chr3R	24629338	24630733	FBgn0046685	CG31127
chr3R	24702337	24704111	FBgn0003429	CG10693
chr3R	24786409	24788238	FBgn0039225	CG6892
chr3R	24798668	24800137	FBgn0039226	CG18410
chr3R	25022855	25025811	FBgn0015240	CG11783
chr3R	25026840	25028702	FBgn0039259	CG11781
chr3R	25051138	25052112	FBgn0039266	CG11791
chr3R	25056029	25058515	FBgn0051111	CG31111
chr3R	25292195	25293578	FBgn0051102	CG31102
chr3R	25328456	25329787	FBgn0039328	CG10675
chr3R	25735850	25738647	FBgn0267771	CR46102
chr3R	25995805	25997418	FBgn0015269	CG8318
chr3R	26009319	26010375	FBgn0002578	CG8342
chr3R	26020721	26021734	FBgn0002592	CG6104
chr3R	26030457	26031639	FBgn0002632	CG8354
chr3R	26120025	26123256	FBgn0051324	CG31324
chr3R	26228502	26230288	FBgn0265379	CR44320
chr3R	26554826	26557114	FBgn0263289	CG43398
chr3R	26875557	26877608	FBgn0004903	CG6354
chr3R	26978177	26979056	FBgn0039467	CG14253
chr3R	27131681	27136204	FBgn0039492	CG6051
chr3R	27239094	27239596	FBgn0005696	CG5923
chr3R	27604872	27606675	FBgn0039530	CG5586
chr3R	28568782	28574744	NA	NA
chr3R	28622253	28625500	FBgn0039590	CG10011
chr3R	28856003	28859244	FBgn0264324	CG31048
chr3R	29156464	29157584	FBgn0039644	CG11897
chr3R	29214420	29215760	FBgn0029176	CG11901
chr3R	29255370	29256112	FBgn0003525	CG1395
chr3R	29286970	29288522	NA	NA
chr3R	29290474	29292508	NA	NA
chr3R	29457391	29460951	FBgn0264792	CR44022
chr3R	29492801	29493628	FBgn0039666	CG11501
chr3R	29773662	29775634	FBgn0001297	CG33956
chr3R	29775981	29777904	FBgn0001297	CG33956
chr3R	29779587	29780298	FBgn0001297	CG33956
chr3R	30021588	30022564	FBgn0267780	CR46111
chr3R	30099927	30101537	FBgn0266411	CG45051
chr3R	30268401	30275613	FBgn0010113	CG15532
chr3R	30291459	30294355	FBgn0010113	CG15532
chr3R	30448606	30450574	FBgn0039771	CG15538
chr3R	30465844	30468062	FBgn0039774	CG1471
chr3R	30498414	30499449	FBgn0039780	CG9728
chr3R	30801830	30803720	FBgn0011739	CG12072
chr3R	30916934	30917819	FBgn0264833	CR44041
chr3R	31062577	31064079	FBgn0002413	CG2048
chr3R	31066359	31069181	FBgn0024288	CG15552
chr3R	31195360	31197412	FBgn0051004	CG31004
chr3R	31221382	31222544	FBgn0263544	CR43529
chr3R	31323237	31323724	FBgn0085376	CG34347
chr3R	31579796	31581567	FBgn0003268	CG1569
chr3R	31671986	31674129	FBgn0039863	CG1815
chr3R	31688593	31690907	FBgn0267124	CR45564
chr3R	31712220	31715331	FBgn0003870	CG1856
chr3R	31718653	31719802	FBgn0003870	CG1856
chr3R	31721044	31723393	FBgn0003870	CG1856
chr3R	31724084	31725829	FBgn0003870	CG1856
chr3R	31725982	31727125	FBgn0003870	CG1856
chrX	520253	523668	FBgn0023535	CG18104
chrX	578881	582647	FBgn0000108	CG7727
chrX	635624	637686	FBgn0020381	CG7486
chrX	766419	768880	FBgn0086666	CR33918
chrX	769413	769902	FBgn0027343	CG16785
chrX	789606	791366	FBgn0265662	CR44469
chrX	1050786	1051773	FBgn0040398	CG14629
chrX	1171628	1173046	FBgn0040364	CG11378
chrX	1176283	1179674	FBgn0040363	CG11384
chrX	1228873	1230455	FBgn0261444	CG3638
chrX	1239298	1240679	FBgn0026876	CG11403
chrX	1264369	1274313	FBgn0028550	CG11405
chrX	1276102	1278293	FBgn0028550	CG11405
chrX	1281142	1283021	FBgn0025642	CG32812
chrX	1345990	1348447	FBgn0024366	CG11409
chrX	1370188	1371673	FBgn0029573	CG14770
chrX	1378844	1382305	FBgn0023169	CG3051
chrX	1384042	1386566	FBgn0024986	CG3719
chrX	1387937	1389764	FBgn0024985	CG11448
chrX	1465362	1467424	FBgn0029580	CG14778
chrX	1577667	1578749	FBgn0283451	CG11491
chrX	1614113	1618499	FBgn0283451	CG11491
chrX	1619712	1621053	FBgn0283451	CG11491
chrX	1825906	1827615	FBgn0029590	CG14811
chrX	1939947	1942503	FBgn0023520	CG3857
chrX	1990078	1991140	FBgn0264562	CG43934
chrX	1995126	1995991	FBgn0264562	CG43934
chrX	2043700	2044499	FBgn0003964	CG4380
chrX	2049558	2050539	FBgn0025631	CG4322
chrX	2069509	2071231	FBgn0025628	CG4199
chrX	2120204	2124750	FBgn0004860	CG3895
chrX	2134474	2138863	FBgn0004861	CG18412
chrX	2145313	2147122	FBgn0004654	CG3724
chrX	2180796	2181907	FBgn0040899	CG17776
chrX	2192654	2195112	FBgn0023549	CG3456
chrX	2220738	2224288	FBgn0029606	CG14052
chrX	2316971	2318580	FBgn0003079	CG2845
chrX	2352589	2356301	FBgn0003159	CG2841
chrX	2456522	2459849	FBgn0040388	CG32796
chrX	2461231	2462782	FBgn0040388	CG32796
chrX	2465621	2467025	FBgn0040388	CG32796
chrX	2505544	2508264	FBgn0284408	CG33950
chrX	2588036	2591867	FBgn0040375	CG13760
chrX	2592417	2593973	FBgn0001404	CG9659
chrX	3136600	3136952	FBgn0004647	CG3936
chrX	3372921	3375025	FBgn0266350	CR44999
chrX	3675212	3675923	FBgn0023215	CG13316
chrX	4323667	4326658	FBgn0002707	CG3697
chrX	4574161	4576036	FBgn0029717	CG12684
chrX	4583902	4585596	FBgn0052773	CR32773
chrX	4605187	4607999	FBgn0052773	CR32773
chrX	4612365	4615108	FBgn0052773	CR32773
chrX	4677158	4680565	FBgn0262699	CG3000
chrX	4707014	4707906	FBgn0029722	CG7024
chrX	5046005	5049149	FBgn0003028	CG6824
chrX	5517450	5518846	FBgn0267074	CR45518
chrX	5689969	5690505	FBgn0000394	CG12410
chrX	5744381	5745577	FBgn0261383	CG3125
chrX	5884515	5888982	FBgn0029819	CG3016
chrX	5900207	5902953	FBgn0029821	CG4020
chrX	5975865	5977358	FBgn0029830	CG14447
chrX	6061421	6063155	FBgn0029836	CG5928
chrX	6285016	6285681	FBgn0029856	CG11700
chrX	6546140	6547735	FBgn0085446	CG34417
chrX	6551081	6552075	FBgn0085446	CG34417
chrX	6774591	6775998	FBgn0003390	CG3135
chrX	6776060	6779042	FBgn0003390	CG3135
chrX	6779190	6779741	FBgn0003390	CG3135
chrX	6800153	6800970	FBgn0029903	CG4532
chrX	6803624	6805047	FBgn0029903	CG4532
chrX	6805094	6805875	FBgn0029903	CG4532
chrX	6868021	6869411	FBgn0029915	CG14434
chrX	6996929	6999033	FBgn0027108	CG4590
chrX	7230221	7232585	FBgn0029939	CG9650
chrX	7295829	7296837	FBgn0029941	CG1677
chrX	7299570	7300399	FBgn0265457	CR44357
chrX	7303405	7304542	FBgn0029941	CG1677
chrX	7308503	7309489	FBgn0029941	CG1677
chrX	7318460	7320006	FBgn0029944	CG2079
chrX	7578883	7580106	NA	NA
chrX	7706611	7708906	FBgn0029504	CG12690
chrX	7937176	7939913	FBgn0029980	CG10778
chrX	7964397	7967450	FBgn0003656	CG2212
chrX	8242246	8243965	FBgn0030026	CG10964
chrX	8419988	8422652	FBgn0261793	CG18009
chrX	8506992	8508894	FBgn0053181	CG33181
chrX	8682619	8685305	FBgn0030056	CG11284
chrX	8888871	8892481	FBgn0011661	CG10701
chrX	8895208	8896557	FBgn0011661	CG10701
chrX	9059764	9062537	FBgn0030077	CG15365
chrX	9192992	9194470	FBgn0030100	CG12106
chrX	9576609	9580097	FBgn0259741	CG42395
chrX	9583242	9586688	FBgn0001186	CG3001
chrX	9596949	9601633	FBgn0030141	CG3002
chrX	9640350	9642844	FBgn0028341	CG32697
chrX	9644803	9647492	FBgn0028341	CG32697
chrX	10110759	10113389	FBgn0083940	CG34104
chrX	10220407	10221486	FBgn0040941	CG15308
chrX	10478238	10479466	FBgn0261710	CG17255
chrX	10581754	10582689	FBgn0085443	CG34414
chrX	10771979	10775632	FBgn0052672	CG32672
chrX	10886710	10887879	FBgn0267177	CR45617
chrX	11338774	11341260	FBgn0085377	CG34348
chrX	11422876	11424110	FBgn0001145	CG1743
chrX	11681769	11682838	FBgn0030323	CG2371
chrX	11695809	11696323	FBgn0011754	CG1830
chrX	11873066	11874110	FBgn0030346	CG11802
chrX	12735271	12737050	FBgn0265523	CG4013
chrX	13304742	13306560	FBgn0266376	CR45018
chrX	13390254	13391854	FBgn0265831	CR44620
chrX	13403183	13404531	FBgn0030484	CG1681
chrX	13404828	13407267	FBgn0030484	CG1681
chrX	13410265	13411762	FBgn0030485	CG1998
chrX	13624308	13627538	FBgn0030504	CG2691
chrX	13640197	13642513	FBgn0030505	CG11172
chrX	13678639	13680071	FBgn0030511	CG11158
chrX	13812202	13812690	FBgn0030528	CG11095
chrX	13813286	13814597	FBgn0030529	CG10997
chrX	13814796	13815840	FBgn0030529	CG10997
chrX	14118373	14121273	FBgn0011983	CR32609
chrX	14483191	14484498	FBgn0030569	CG9411
chrX	14950044	14950685	FBgn0000535	CG10952
chrX	15043262	15047336	FBgn0030603	CG5541
chrX	15048524	15049132	FBgn0030603	CG5541
chrX	15069354	15072626	FBgn0264389	CG9053
chrX	15077625	15080619	FBgn0053178	CG33178
chrX	15453243	15453914	FBgn0040285	CG9195
chrX	15499035	15503896	FBgn0027287	CG33206
chrX	15543040	15544200	FBgn0022710	CG9210
chrX	15591681	15594580	FBgn0030662	CG9220
chrX	15624361	15626392	FBgn0003463	CG9224
chrX	15702626	15704266	FBgn0030670	CG9245
chrX	15732658	15734532	FBgn0026666	CG8198
chrX	15787058	15789092	FBgn0026374	CG8497
chrX	15811566	15814426	FBgn0003345	CG8544
chrX	16277540	16279948	FBgn0000536	CG3525
chrX	16317823	16320632	FBgn0004432	CG9916
chrX	16405587	16407320	FBgn0030746	CG9981
chrX	16413290	16415666	FBgn0030748	CG4394
chrX	16420222	16423604	FBgn0026575	CG32575
chrX	16440276	16441841	FBgn0030753	CG4420
chrX	16571121	16575168	FBgn0267912	CG9819
chrX	16597491	16599775	FBgn0015615	CG9802
chrX	16642942	16644519	FBgn0261791	CG9742
chrX	17295070	17298761	FBgn0030838	CG5445
chrX	17624135	17626251	FBgn0030850	CG8408
chrX	17626617	17627811	FBgn0030853	CG5703
chrX	17826739	17827874	FBgn0030870	CG6398
chrX	17875540	17877364	FBgn0259168	CG42273
chrX	17879892	17882939	FBgn0030881	CG12985
chrX	18275598	18277430	FBgn0053542	CG33542
chrX	18510425	18511359	FBgn0265598	CG44425
chrX	18645017	18647275	FBgn0027335	CG6606
chrX	18654179	18654819	FBgn0030944	CG6617
chrX	18776000	18778904	FBgn0030955	CG6891
chrX	18783075	18785254	FBgn0030956	CG18259
chrX	18870210	18872324	FBgn0085430	CG34401
chrX	18972414	18973864	FBgn0264090	CG43759
chrX	19000195	19002449	FBgn0264090	CG43759
chrX	19179402	19181335	FBgn0030992	CG33253
chrX	19188070	19188473	FBgn0030993	CG7635
chrX	19244026	19244988	FBgn0031005	CG7890
chrX	19259908	19262394	FBgn0040068	CG7893
chrX	19304710	19306629	FBgn0031012	CG8051
chrX	19315157	19316498	FBgn0259834	CG8062
chrX	19317911	19323393	FBgn0259834	CG8062
chrX	19352420	19355723	FBgn0086778	CG32538
chrX	19479594	19480635	FBgn0052533	CG32533
chrX	19500611	19501668	FBgn0027621	CG3400
chrX	19630540	19632161	FBgn0087008	CG12238
chrX	19667162	19669412	FBgn0004057	CG12529
chrX	19752041	19754505	FBgn0031069	CG12703
chrX	20253680	20254168	FBgn0031098	CG17068
chrX	20479544	20483657	FBgn0031118	CG1412
chrX	21038567	21040977	FBgn0025814	CG1742
chrX	21064507	21065997	FBgn0031150	CG32513
chrX	21377214	21378763	FBgn0003423	CG1417
chrX	21518753	21519670	FBgn0266457	CR45082
chr2R	18531785	18533063	FBgn0034356	CG10924
chr2R	24748923	24750995	FBgn0050421	CG30421
chr3R	24894564	24895495	FBgn0051121	CG31121
chr3R	25739225	25741560	FBgn0066101	CG31094
chrX	19152776	19155687	FBgn0261461	CG42274
chr2R	18410779	18415048	FBgn0013983	CG5576
chr3R	9437057	9439528	FBgn0261552	CG42670
chrX	10738591	10741092	FBgn0265987	CR44766
chrX	16280397	16283599	FBgn0000536	CG3525
chr2L	20716083	20716869	FBgn0014859	CG1864
chr2R	12928334	12929774	FBgn0033782	CG3850
chr3L	8056348	8060138	FBgn0026263	CG7574
chr3L	17003521	17008118	FBgn0036684	CG3764
chr3R	15228895	15230523	FBgn0085345	CG34316
chr2R	24607392	24607894	FBgn0035039	CG3608
chr3R	21071542	21072320	FBgn0038851	CG5737
chr3R	25885049	25886953	FBgn0028717	CG17367
chrX	598509	600725	FBgn0025633	CG13366
chr2R	9430287	9432086	FBgn0017558	CG8808
chr3L	885925	887931	FBgn0263476	CR43591
chrX	18082006	18084112	FBgn0030890	CG7536
chrX	19565381	19566517	FBgn0000257	CG12230
chr3L	17008123	17012390	FBgn0036684	CG3764
chr3R	5086042	5089347	FBgn0010313	CG2530
chr3R	10268336	10270032	FBgn0262617	CG43143
chrX	13245020	13246713	FBgn0004456	CG1771
chr2L	6065784	6067079	FBgn0266449	CG9159
chr2R	7822848	7823745	FBgn0003082	CG11205
chr2R	11678355	11681591	FBgn0044020	CG8998
chr2R	12529681	12530943	FBgn0011592	CG8581
chr2L	15488101	15489934	FBgn0266831	CR45293
chr3R	16238218	16240115	FBgn0040071	CG6889
chr3R	23722475	23725614	FBgn0002922	CG10250
chrX	1169968	1171209	FBgn0040364	CG11378
chr2L	7991557	7995134	FBgn0031970	CG7227
chr2R	12437235	12439163	FBgn0033738	CG8830
chrX	6858075	6861994	FBgn0029915	CG14434
chr2R	15998992	16001691	FBgn0020236	CG8322
chr2R	22178845	22183550	FBgn0034708	CG5625
chr3L	5806939	5810303	FBgn0035639	CG5537
chr3R	5764042	5765654	FBgn0027608	CG2082
chr2R	18627599	18628377	FBgn0266671	CG5341
chr3L	3044241	3045284	FBgn0052484	CG32484
chr3R	9392109	9394869	FBgn0000723	CG8874
chr2L	12719135	12722327	FBgn0032455	CG5792
chr3L	2255686	2258006	FBgn0015359	CG2034
chr3L	8691011	8692930	FBgn0265719	CR44526
chr3R	6404698	6406338	FBgn0037443	CG1021
chr2L	15911101	15914082	FBgn0032577	CG13244
chr2R	20161481	20164074	NA	NA
chr3L	20784031	20786499	FBgn0037022	CG11396
chr3L	1320881	1321457	FBgn0010246	CG9155
chr3L	11169100	11171278	FBgn0264721	CR43989
chr3R	19908895	19910711	FBgn0038746	CG4510
chr2R	11195758	11198837	FBgn0003396	CG7734
chrX	1247925	1249491	FBgn0028550	CG11405
chrX	10838652	10842291	FBgn0003321	CG1664
chrX	19665442	19666651	FBgn0031054	CG14216
chr3L	11525085	11527312	FBgn0259481	CG11711
chr3L	17602313	17608158	FBgn0000567	CG32180
chr3L	19868210	19872877	FBgn0262518	CG8287
chr2L	6821050	6825363	FBgn0051632	CG31632
chr2L	7676550	7679661	FBgn0264087	CG43756
chr3L	15235298	15236319	FBgn0029114	CG6890
chr2L	15245797	15247789	FBgn0028862	CG15267
chrX	17877403	17879877	FBgn0030881	CG12985
chr2R	15929395	15933757	FBgn0034049	CG8291
chr3R	16446272	16448102	FBgn0038428	CG14894
chrX	6601297	6605379	FBgn0029881	CG3973
chr3L	9359791	9361230	FBgn0085485	CG34456
chrX	21069975	21071243	FBgn0031150	CG32513
chr2R	9603970	9604469	FBgn0261016	CG42600
chr3L	22885912	22889982	FBgn0037203	CG11128
chrX	3871727	3872496	FBgn0265575	CG44402
chr3L	1515732	1518582	FBgn0261243	CG1009
chr3R	12699121	12702582	FBgn0038078	CG14391
chr3R	5672393	5673802	FBgn0037363	CG1347
chr3R	7911276	7913821	FBgn0037530	CG2943
chr4	501374	507627	FBgn0004607	CG1449
chrX	10717422	10721029	FBgn0052676	CG32676
chr2R	8946562	8951121	FBgn0027607	CG8230
chr2R	6130985	6135449	FBgn0033063	CG14589
chr3L	544381	551593	FBgn0267982	CR46249
chr2L	7973467	7974893	FBgn0085450	CG34421
chrX	2141629	2143311	FBgn0004861	CG18412
chr3L	9509176	9511184	FBgn0036008	CG3408
chr3R	5261672	5266229	FBgn0264785	CG44015
chr2L	5295136	5299149	FBgn0267294	CR45730
chr3L	16001752	16006255	FBgn0036557	CG5904
chr2R	8149789	8156179	FBgn0264877	CR44068
chr3L	12075639	12082788	FBgn0284221	CG5661
chr3L	9630740	9631491	FBgn0036019	CG14176
chr2R	8720968	8725012	FBgn0005695	CG8411
chrX	21351675	21353966	FBgn0015527	CG1685
chr3L	8704074	8707421	NA	NA
chrX	1182618	1185005	FBgn0040361	CG14627
chr3R	18913489	18918329	FBgn0261113	CG17836
chr2R	9609286	9610624	FBgn0033437	CG12926
chr3R	26225462	26227781	FBgn0265379	CR44320
chr2L	10513266	10515974	FBgn0010398	CG6098
chrX	6355756	6357862	FBgn0261955	CG3861
chrX	11389915	11391404	FBgn0001624	CG1725
chr2L	8128642	8132864	FBgn0031987	CG12375
chr2R	6529639	6533914	FBgn0264506	CR43905
chr3R	7120792	7122867	FBgn0261238	CG1070
chr2L	15629330	15631073	FBgn0028945	CG7631
chr3L	14554959	14556101	FBgn0266117	CR44843
chr2R	10733822	10737979	FBgn0033544	CG7220
chr2R	18811804	18815613	FBgn0010551	CG15081
chrX	1242296	1242787	FBgn0026876	CG11403
chrX	11135883	11136944	FBgn0030269	CG18292
chrX	10583397	10585459	FBgn0085443	CG34414
chr3R	20261717	20266911	FBgn0262582	CG43122
chr3R	29780353	29788881	FBgn0001297	CG33956
chr2L	8381339	8382645	FBgn0032036	CG13384
chr2R	8601367	8608540	FBgn0267792	CG8643
chrX	12664024	12669375	FBgn0011837	CG4070
chr2R	16126560	16130571	FBgn0086676	CG8428
chr3R	22622411	22626775	FBgn0263451	CR43474
chr2L	299861	302487	FBgn0004611	CG4574
chr2L	2195803	2204137	FBgn0085201	CG34172
chr2L	16253941	16258274	FBgn0284225	CG46309
chr2R	22536544	22539632	FBgn0003175	CG4444
chrX	12576564	12578399	FBgn0030400	CG11138
chr2L	13509575	13514777	FBgn0023407	CG9239
chr3L	8679760	8690647	FBgn0265719	CR44526
chr3L	5351488	5354207	FBgn0052420	CR32420
chr3R	5760896	5763534	FBgn0266672	CG2095
chr3L	17531021	17541576	FBgn0259174	CG42279
chr3L	19618647	19619408	FBgn0260655	CG8793
chr3R	22684337	22688263	FBgn0046114	CG4919
chrX	19494788	19500449	FBgn0027621	CG3400
chrX	3866869	3870681	FBgn0019661	CR32777
chr2R	22396331	22400404	FBgn0034724	CG3624
chr2R	21193146	21193728	FBgn0034602	CG15658
chr3R	16007839	16012994	FBgn0038391	CG10278
chr3R	11198697	11202903	FBgn0261808	CG31299
chr3R	9954094	9959696	FBgn0267336	CG34360
chr3L	15689976	15695426	FBgn0085481	CG34452
chr3R	22522791	22528627	FBgn0038981	CG5346
chr3R	17703418	17710861	FBgn0261885	CG7467
chr3R	26011403	26013851	FBgn0266400	CR45040
chr3R	26917294	26920013	FBgn0004510	CG6338
chr2R	7983646	7986891	FBgn0033246	CG11198
chr2R	21039955	21045837	NA	NA
chr2R	6244798	6246596	FBgn0033075	NA
chr3R	30198593	30205859	FBgn0000094	CG1361
chr3L	9712631	9716114	FBgn0045823	CG16707
chr2L	15331916	15334314	FBgn0001981	CG3758
chr2L	18984595	18986506	FBgn0032734	CG15169
chr3R	14566900	14570115	FBgn0051313	CG31313
chr2R	25005544	25011618	FBgn0004055	CG3533
chr2L	5255892	5256904	FBgn0003716	CG14026
chr3L	15527415	15528623	FBgn0053986	CG33986
chr2L	3301220	3311158	FBgn0031518	CG3277
chr2L	20778980	20781650	FBgn0000251	CG1759
chr3R	17053194	17058153	FBgn0020493	CG5201
